# Supplementary material for: Molecular basis for substrate specificity of the Phactr1/PP1 phosphatase holoenzyme
Source: eLife. 2020 Sep 25;9:e61509. doi: 10.7554/eLife.61509 (PMC7599070; doi:10.7554/eLife.61509)
Supplement: Supplementary file 1. — (A, B) SILAC phosphoproteomics in NIH3T3 cells. (A) NIH3T3 cells expressing doxycycline-inducible Phactr1XXX, Phactr1XXXΔC or vector alone were cultured in R0K0 or R10K8 SILAC media, protein expression induced with doxycycline, and cell lysates analysed by MS proteomics. Phosphorylation sites are annotated with dephosphorylation score, raw H/L values listed. (B) 1D enrichment analysis of Gene Ontology terms and kinase motifs based on the dataset from A, table A. Terms with Benjamini-Hochberg FDR < 0.02 are shown. Gene Ontology Biological Process terms are in bold and those with positive mean value are reported in Figure 3B. (C-E) Wildtype (WT) or Phactr1-null (KO) cortical and hippocampal neurons DIV10 were treated with DMSO vehicle, CD or LB for 30' and then analysed by TMT phosphoproteomics in MS2 and MS3 modes. Reporter ion intensities were normalised using Z-score function. (C) Raw and Z-score values for MS2 mode. (D) Raw and Z-score values for MS3 mode. (E) t-test was applied to (DMSO - CD) differences in WT neurons vs KO neurons. Phosphorylation sites are described and annotated with t-test difference and significance. [file elife-61509-supp1.xlsx]

## Sheet: Notes
Supplementary File 1. Table S1. Proteomics data supporting experiments in the main text
Sheets A,B - SILAC phosphoproteomics experiment in NIH3T3 cells
	NIH3T3 cells expressing doxycyclin-inducible Phactr1XXX, Phactr1XXXDC or vector alone were cultured in R0K0 or R10K8 SILAC media, protein expression induced with doxycyclin, and cell lysates analysed by MS proteomics.
A. Dephosphorylation, 3T3 cells	Phosphorylation sites are annotated with dephosphorylation score, raw H/L values listed. log2(dephosphorylation score) = 0.25*[log2(2H/1L)+log2(3H/1L)+log2(2L/1H)+log2(3L/1H)]
B. GO analysis, 3T3 cells	1D enrichment analysis of Gene Ontology terms and kinase motifs based on the dataset from Table S1A. Terms with Benjamini-Hochberg FDR < 0.02 are shown. Gene Ontology Biological Process terms are in bold. Positively enriched terms are reported on Figure 3B.
Sheets C, D, E - TMT phosphoproteomics experiments in cultured primary neurons
	Phactr1-/- (KO) or Phactr1+/+ (WT) cortical and hippocampal neurons DIV10 were treated with DMSO vehicle, CD or LB for 30' and were analysed by TMT phosphoproteomics in MS2 and MS3 modes. Reporter ion intensities were normalized using Z-score function.
C. MS2 raw data, neurons	Raw and Z-score values for MS2 mode.
D. MS3 raw data, neurons	Raw and Z-score values for MS3 mode.
E. Dephosphorylarion, neurons	t-test was applied to (DMSO - CD) differences in WT neurons vs KO neurons. Phosphorylation sites are described and annotated with t-test difference and significance.

## Sheet: A. Dephosphorylation, 3T3 cells
Gene names	Protein names	Amino acid	Position	SILAC score	-8	-7	-6	-5	-4	-3	-2	-1	0	1	2	3	4	5	6	7	8	Sequence window	Proteins	Positions	Motifs	Phospho (STY) Probabilities	Score for localization	Localization probability	log2(2H/1L)	log2(3H/1L)	log2(2L/1H)	log2(3L/1H)	log2(dephosphorylation score)	Peptide intensity (log10)	Score	Charge	m/z	Mass error [ppm]
Baiap2	Brain-specific angiogenesis inhibitor 1-associated protein 2	S	455	7.91836	S	L	Q	Q	G	K	S	S	S	T	G	N	L	L	D	K	D	GSDRLHMSLQQGKSSSTGNLLDKDDLALPPP	B1AZ47;Q8BKX1;Q3UKP6;B1AZ46;B1AZ43;B1AZ45	455;455;455;455;455;415	MDC1 BRCT domain binding motif;PKA kinase substrate motif;PKC kinase substrate motif;Plk1 PBD domain binding motif	SSS(0.999)T(0.001)GNLLDK	135.81	0.998935	2.36025	3.52206	2.68446	3.37405	2.9852	7.94832	143.94	2	551.245	-0.032829
Eif4b	Eukaryotic translation initiation factor 4B	S	497	5.91122	S	N	P	P	A	R	S	Q	S	S	D	T	E	Q	P	S	P	NAWVKRSSNPPARSQSSDTEQPSPTSGGGKV	Q3TSY9;Q3UGC0;Q8BGD9;Q3TLQ9;Q3TDD8;Q922K6	497;497;497;497;497;249	14-3-3 domain binding motif;Calmodulin-dependent protein kinase II substrate motif;Casein kinase I substrate motif;Casein kinase II substrate motif;PKA kinase substrate motif;PKC kinase substrate motif	S(0.006)QS(0.994)SDTEQPSPTSGGGK	247.64	0.993555	0.339365	1.33354	NaN	6.01746	2.56346	7.93045	255.59	2	865.349	-0.1739
Mtap1b	Microtubule-associated protein 1B;MAP1 light chain LC1	T	1945	5.61988	E	I	T	E	K	T	T	R	T	P	E	E	G	G	Y	S	Y	EDGGYTCEITEKTTRTPEEGGYSYEISEKTT	B2RQQ5;P14873	1945;1945	Casein kinase II substrate motif;Growth associated histone HI kinase substrate motif;GSK-3, ERK1, ERK2, CDK5 substrate motif;PKA kinase substrate motif;WW domain binding motif	T(0.041)T(0.041)RT(0.917)PEEGGYSYEISEK	130.4	0.917188	2.14094	2.87094	2.54153	2.40874	2.49054	7.60455	147.09	3	676.293	0.98328
Plekho2	Pleckstrin homology domain-containing family O member 2	S	395	5.07063	S	Q	F	H	P	R	S	S	S	L	G	D	L	L	R	E	S	LPFSDLPSQFHPRSSSLGDLLRESPQHPRLP	Q8K124	395	14-3-3 domain binding motif;Calmodulin-dependent protein kinase II substrate motif;Casein kinase II substrate motif;MDC1 BRCT domain binding motif;Phosphorylase kinase substrate motif;PKA kinase substrate motif;PKC kinase substrate motif;Plk1 PBD domain binding motif;Pyruvate dehydrogenase kinase substrate motif	SSS(0.999)LGDLLR	140.78	0.999481	2.01482	2.70017	NaN	2.31151	2.34217	7.2577	172.17	2	514.245	-0.3005
Ndrg1	Protein NDRG1	S	2	4.90976	_	_	_	_	_	_	_	M	S	R	E	L	H	D	V	D	L	______________MSRELHDVDLAEVKPLV	B7ZWC0;Q3TD08;Q545R3;Q62433;Q3TSR4;E9Q514;E9Q3F9;E9Q5I8;E9Q7V2;E9Q147;E9Q7G8;E9PZC7;E9Q0J8;E9PVF3	2;2;2;2;2;2;2;2;2;2;2;2;2;2	Casein kinase II substrate motif	S(1)RELHDVDLAEVKPLVEK	75.3	1	2.63965	2.81174	1.43557	NaN	2.29565	7.51783	125.73	3	733.707	0.6648
Spna2	Spectrin alpha chain, brain	S	1031	4.38443	K	L	D	P	A	Q	S	A	S	R	E	N	L	L	E	E	Q	VPAAYVKKLDPAQSASRENLLEEQGSIALRQ	E9Q447;A3KGU7;B2RXX6;B9EKJ1;P16546;A3KGU5;B7ZWK3	1031;1031;1031;1031;1031;1031;1031	Casein kinase II substrate motif	LDPAQS(0.021)AS(0.979)RENLLEEQGSIALR	160.27	0.979107	0.220454	3.13849	2.35203	2.81858	2.13239	8.05843	161.35	3	826.406	0.13825
Spna2	Spectrin alpha chain, brain	S	1029	4.38394	V	K	K	L	D	P	A	Q	S	A	S	R	E	N	L	L	E	GFVPAAYVKKLDPAQSASRENLLEEQGSIAL	E9Q447;A3KGU7;B2RXX6;B9EKJ1;P16546;A3KGU5;B7ZWK3	1029;1029;1029;1029;1029;1029;1029	Casein kinase II substrate motif	LDPAQS(0.892)AS(0.108)RENLLEEQGSIALR	152.32	0.892024	2.47147	1.11203	2.35292	2.59248	2.13223	8.03145	161.35	3	826.406	0.058515
Cd2ap	CD2-associated protein	S	458	4.18616	E	Q	L	P	V	R	P	K	S	V	D	L	D	A	F	V	A	SKPKLDPEQLPVRPKSVDLDAFVARNSKETD	B2RRE8;Q9JLQ0	458;458	14-3-3 domain binding motif;Calmodulin-dependent protein kinase II substrate motif;Phosphorylase kinase substrate motif;PKA kinase substrate motif;PKC kinase substrate motif	S(1)VDLDAFVAR	175.48	1	2.00159	2.09414	2.09758	2.06921	2.06563	7.61223	186.17	2	586.771	-0.35102
Ahnak		S	5525	4.12452	K	S	S	K	A	S	L	G	S	L	E	G	E	V	E	A	E	SGSKGDLKSSKASLGSLEGEVEAEASSPKGK	E9Q616;Q8VDN3;E9Q1H8;Q6UIL4	5525;893;606;546	Casein kinase II substrate motif	AS(1)LGS(1)LEGEVEAEAS(0.052)S(0.948)PKGK	207.97	1	1.93885	1.9768	2.13581	2.12545	2.04423	9.24679	302.66	2	1093.44	0.25297
Ahnak		T	4342	3.94413	K	G	P	K	L	D	I	D	T	P	D	I	D	I	H	G	P	KGPKVDIKGPKLDIDTPDIDIHGPEGKLKGP	E9Q616;A0PJF4	4342;421	b-Adrenergic Receptor kinase substrate motif;Casein kinase I substrate motif;GSK-3, ERK1, ERK2, CDK5 substrate motif;WW domain binding motif	LDIDT(1)PDIDIHGPEGK	148.52	1	0.754545	NaN	2.60982	2.57476	1.97971	7.08625	148.52	3	605.612	0.31218
Clasp1	CLIP-associating protein 1	S	1194	3.84412	A	I	E	K	F	S	F	R	S	Q	E	D	L	N	E	P	I	SLRGVTEAIEKFSFRSQEDLNEPIKRDGKKD	E9QKH0;B2RY22;Q80TV8;E9Q6L0;E9QNY9;A5D6Q8	1194;1110;1193;1126;1184;1118	ATM kinase substrate motif;Casein kinase II substrate motif;DNA dependent Protein kinase substrate motif;Pyruvate dehydrogenase kinase substrate motif	FS(0.001)FRS(0.999)QEDLNEPIKR	178.51	0.999266	1.67753	2.08879	1.9295	2.07479	1.94265	7.87519	190.55	3	649.31	0.047472
Ahnak		S	136	3.72353	T	K	I	K	P	R	L	R	S	E	D	G	V	E	G	D	L	DYQRIYTTKIKPRLRSEDGVEGDLGETQSRT	E9Q616;Q8BRB8	136;136	14-3-3 domain binding motif;Calmodulin-dependent protein kinase II substrate motif;G protein-coupled receptor kinase 1 substrate motif;MAPKAPK1 kinase substrate motif;PKA kinase substrate motif;PKC kinase substrate motif	LRS(1)EDGVEGDLGETQSR	190.91	1	1.89406	1.51531	2.05463	2.12268	1.89667	9.10792	285.46	2	964.423	0.4351
Tpd52l2	Tumor protein D54	T	186	3.58092	M	P	V	M	R	N	S	A	T	F	K	S	F	E	D	R	V	SIRHSISMPVMRNSATFKSFEDRVGTIKSKV	A2AUD5;A2AUD6;Q9CYZ2;Q3TAI4;Q8BKP1;Q3TUJ9;Q9CZ22	186;177;177;163;157;143;177	AMP-activated protein kinase substrate motif;Casein kinase I substrate motif;Casein kinase II substrate motif;PKA kinase substrate motif;PKC kinase substrate motif	NS(0.002)AT(0.977)FKS(0.021)FEDR	120.84	0.976575	2.36513	0.493852	2.662	NaN	1.84033	7.51538	120.84	2	691.293	0.52865
Tpd52l2	Tumor protein D54	S	189	3.47864	M	R	N	S	A	T	F	K	S	F	E	D	R	V	G	T	I	HSISMPVMRNSATFKSFEDRVGTIKSKVVGG	A2AUD5;A2AUD6;Q9CYZ2;Q3TAI4;Q8BKP1;Q3TUJ9;Q9CZ22	189;180;180;166;160;146;180	Casein kinase II substrate motif;Pyruvate dehydrogenase kinase substrate motif	NSATFKS(1)FEDR	153.23	0.999996	2.64108	0.344601	2.42546	1.78294	1.79852	8.00677	153.23	2	691.293	-0.16499
Plec	Plectin	T	3889	3.46535	F	R	G	L	R	K	Q	I	T	V	E	E	L	V	R	S	Q	SDARKLTFRGLRKQITVEELVRSQVMDEATA	E9QMZ5;E9QN87;Q9QXS1;E9QPE8;E9QK43;E9QQ00;Q6S385;E9QL05;E9PY96;Q6S387;E9QLJ5;Q6S393;E9QKX4;Q6S392;E9Q153;Q6S388;E9QK01;Q6S390;E9Q3W4	3889;4037;4037;4032;3935;3896;3896;3894;3889;3889;3880;3880;3867;3867;3857;3857;3795;3795;3732	AMP-activated protein kinase substrate motif;Calmodulin-dependent protein kinase II substrate motif;Casein kinase II substrate motif;Chk1 kinase substrate motif;PKA kinase substrate motif;PKC kinase substrate motif	KQIT(1)VEELVR	152.16	1	2.13425	1.0481	2.16301	1.82664	1.793	8.11183	164.88	2	647.842	-0.28541
Ahnak		S	1283	3.41825	L	P	K	A	D	L	D	V	S	G	P	K	V	D	I	D	V	AEGPEVSLPKADLDVSGPKVDIDVPDVNIEG	E9Q616;F7BRM2;Q6UL10;A0PJF4;Q8BKS2;A0JLR7	1283;1018;1593;77;51;260		ADLDVS(1)GPK	120.87	1	1.28475	NaN	2.09659	1.93843	1.77326	8.03104	147.24	2	491.218	0.4559
Mllt4	Afadin	S	1282	3.3352	I	A	I	Q	R	V	T	R	S	Q	E	E	L	R	E	E	K	TESNHSSIAIQRVTRSQEELREEKVYQLERH	E9Q9C3;E9Q316;Q9QZQ1;E9Q852;E9PYX7	1282;1276;1275;1261;1275	ATM kinase substrate motif;Casein kinase II substrate motif;DNA dependent Protein kinase substrate motif	S(1)QEELREEK	59.116	1	1.45833	1.70903	1.93258	1.85116	1.73777	8.04567	110.35	2	614.266	0.58132
Layn	Layilin	S	299	3.25623	V	Y	N	V	I	R	K	Q	S	E	A	D	L	A	E	P	R	ENSPNLDVYNVIRKQSEADLAEPRPDLKNIS	Q8C351;A4QPF5	299;299	14-3-3 domain binding motif;AMP-activated protein kinase substrate motif;Calmodulin-dependent protein kinase I substrate motif;Calmodulin-dependent protein kinase II substrate motif;Calmodulin-dependent protein kinase IV substrate motif;Casein kinase II substrate motif;Chk1 kinase substrate motif;G protein-coupled receptor kinase 1 substrate motif;HMGCoA Reductase kinase substrate motif;PKA kinas…	KQS(1)EADLAEPRPDLK	62.813	1	1.46436	0.835277	2.21571	2.29747	1.7032	7.69067	76.728	3	592.956	-0.62569
Gapvd1	GTPase-activating protein and VPS9 domain-containing protein 1	S	902	3.20945	P	E	R	L	V	R	S	R	S	S	D	I	V	S	S	V	R	FKQRHSYPERLVRSRSSDIVSSVRRPMSDPS	Q6PAR5;F6X819;F7ADS7;F7ADQ2;F7ADT6	902;739;739;340;19	14-3-3 domain binding motif;AMP-activated protein kinase substrate motif;Calmodulin-dependent protein kinase I substrate motif;Calmodulin-dependent protein kinase II substrate motif;Calmodulin-dependent protein kinase IV substrate motif;Chk1 kinase substrate motif;HMGCoA Reductase kinase substrate motif;PKA kinase substrate motif;PKC kinase substrate motif	S(0.001)RS(0.987)S(0.012)DIVSSVR	107.82	0.98662	1.60003	NaN	1.68029	1.76665	1.68232	7.31664	129.01	2	636.801	-0.55026
Pcm1	Pericentriolar material 1 protein	S	1729	3.1867	R	I	L	E	G	D	H	G	S	P	A	G	E	I	D	D	E	SYAKEAKRILEGDHGSPAGEIDDEDKDKDET	B2RSW8;Q9R0L6	1729;1729	Casein kinase I substrate motif;ERK1,2 kinase substrate motif;GSK-3, ERK1, ERK2, CDK5 substrate motif;WW domain binding motif	ILEGDHGS(1)PAGEIDDEDKDKDETETVK	47.728	0.999798	1.45265	1.86215	1.71071	1.66273	1.67206	7.94272	47.728	4	756.332	-0.009521
Ahnak		T	4950	3.14091	P	K	V	Q	A	N	L	D	T	P	D	I	N	I	E	G	P	IEGNLKGPKVQANLDTPDINIEGPEAKIKAP	E9Q616;Q8VDN3;F7BRM2;Q6UL10;A0PJF4;E9Q1H8;Q8BKS2	4950;318;2077;2079;1029;33;411	b-Adrenergic Receptor kinase substrate motif;GSK-3, ERK1, ERK2, CDK5 substrate motif;WW domain binding motif	VQANLDT(1)PDINIEGPEAK	146.25	1	1.09214	NaN	1.89105	1.97036	1.65118	7.37046	206.49	2	1002.47	1.6169
Ctnnd1	Catenin delta-1	T	869	3.12594	S	S	H	S	Y	D	D	S	T	L	P	L	I	D	R	N	Q	NNASRSQSSHSYDDSTLPLIDRNQKSDKKPD	E9Q8Z8;E9Q8Z6;E9Q8Z5;P30999;G3X9V2;E9Q904;E9Q901;E9Q903;D3Z2H2;E9Q8Z9;E9Q8Z4;E9Q905;E9Q907;E9Q906;D3Z7H6;E9Q986;D3Z2H7	869;863;863;869;863;815;809;815;815;809;799;768;762;762;768;762;540	Casein kinase I substrate motif;MDC1 BRCT domain binding motif;Plk1 PBD domain binding motif	SQSSHSYDDS(0.002)T(0.998)LPLIDR	144.27	0.99824	0.767231	1.21437	2.1442	2.45135	1.64429	7.49798	145.9	3	667.625	0.10323
Dclk1		S	352	3.07147	Q	R	D	L	Y	R	P	L	S	S	D	D	L	D	S	V	G	SPGSLRKQRDLYRPLSSDDLDSVGDSV____	Q3UGP0;Q80VB6;Q8VDT3;A8IP62	352;352;352;45	14-3-3 domain binding motif;Calmodulin-dependent protein kinase I substrate motif;Calmodulin-dependent protein kinase II substrate motif;Calmodulin-dependent protein kinase IV substrate motif;Casein kinase II substrate motif;Chk1 kinase substrate motif;PKA kinase substrate motif;PKC kinase substrate motif;Pyruvate dehydrogenase kinase substrate motif	DLYRPLS(0.969)S(0.031)DDLDSVGDSV	205.21	0.968665	0.754289	2.01596	1.75224	1.95322	1.61893	8.16038	220.59	2	1016.94	0.21781
Bmp2k	BMP-2-inducible protein kinase	S	927	2.94732	P	F	S	V	S	A	S	K	S	E	S	K	E	D	V	F	G	FGSTPFQPFSVSASKSESKEDVFGLVPFEEI	Q91Z96	927	Casein kinase II substrate motif;G protein-coupled receptor kinase 1 substrate motif;MAPKAPK2 kinase substrate motif	S(0.5)ES(0.5)KEDVFGLVPFEEITGSQQQQK	106.23	0.5	1.09484	1.57114	1.91953	1.65209	1.5594	7.35885	106.23	3	930.767	0.32452
Bmp2k	BMP-2-inducible protein kinase	S	929	2.94732	S	V	S	A	S	K	S	E	S	K	E	D	V	F	G	L	V	STPFQPFSVSASKSESKEDVFGLVPFEEITG	Q91Z96	929	b-Adrenergic Receptor kinase substrate motif;Casein kinase II substrate motif;MAPKAPK2 kinase substrate motif;PKA kinase substrate motif;PKC kinase substrate motif;Pyruvate dehydrogenase kinase substrate motif	S(0.5)ES(0.5)KEDVFGLVPFEEITGSQQQQK	106.23	0.5	1.09484	1.57114	1.91953	1.65209	1.5594	7.35885	106.23	3	930.767	0.32452
Palld	Palladin	S	1009	2.88446	L	E	R	S	P	V	D	E	S	G	D	E	V	Q	D	P	D	ISEIEYRLERSPVDESGDEVQDPDVPVENAT	Q9ET54;Q8C306;D3Z1J5	1009;159;53	b-Adrenergic Receptor kinase substrate motif;Casein kinase II substrate motif	S(0.085)PVDES(0.915)GDEVQDPDVPVENATAPFFEMK	92.817	0.915198	1.33039	NaN	1.68905	1.56546	1.5283	7.19312	92.817	3	1043.78	0.16296
Dclk1		S	353	2.74767	R	D	L	Y	R	P	L	S	S	D	D	L	D	S	V	G	D	PGSLRKQRDLYRPLSSDDLDSVGDSV_____	Q3UGP0;Q80VB6;Q8VDT3;A8IP62	353;353;353;46	MDC1 BRCT domain binding motif;Plk1 PBD domain binding motif	DLYRPLS(0.074)S(0.926)DDLDSVGDSV	207.76	0.926429	1.65324	1.66253	1.05886	NaN	1.45821	7.86287	207.76	2	1016.94	0.33597
Snx7	Sorting nexin-7	T	351	2.73467	M	K	R	R	D	Q	I	Q	T	E	L	D	S	K	V	E	A	SEMLVGVMKRRDQIQTELDSKVEALTYKKAD	F8WI30;Q5M8N3;Q9CY18;F6RSR4;F7D3B8;Q3TC10	351;293;293;343;268;293	Casein kinase II substrate motif;G protein-coupled receptor kinase 1 substrate motif	DQIQT(1)ELDSKVEALTYKK	70.197	0.999544	1.24744	1.31261	1.64792	1.5975	1.45137	8.33975	70.197	3	730.363	0.23012
Cfl2	Cofilin-2	S	3	2.71637	_	_	_	_	_	_	M	A	S	G	V	T	V	N	D	E	V	_____________MASGVTVNDEVIKVFNDM	P45591;Q3UHW9	3;3	Casein kinase I substrate motif;Casein kinase II substrate motif	AS(1)GVTVNDEVIK	213.99	1	1.52817	-0.75013	2.62087	2.36781	1.44168	8.12597	213.99	2	677.319	0.14425
Cfl1	Cofilin-1	S	3	2.71086	_	_	_	_	_	_	M	A	S	G	V	A	V	S	D	G	V	_____________MASGVAVSDGVIKVFNDM	F8WGL3;P18760;Q544Y7;Q9CX22;E9Q1T2	3;3;3;3;3		AS(1)GVAVSDGVIK	171.76	1	1.52492	-0.77221	2.68001	2.32229	1.43875	9.36803	198.16	2	612.797	0.84693
Tbc1d15	TBC1 domain family member 15	S	205	2.66927	C	Q	N	K	S	L	S	Q	S	F	E	N	L	L	D	E	P	SRTLLVNCQNKSLSQSFENLLDEPAYGLIQK	Q4TVN0;Q9CXF4	205;205	Casein kinase II substrate motif;MAPKAPK2 kinase substrate motif	S(0.042)LS(0.042)QS(0.916)FENLLDEPAYGLIQK	69.122	0.915504	0.580049	1.58852	1.89658	1.60064	1.41645	7.31137	238.07	2	1166.56	-1.5964
Anln	Actin-binding protein anillin	S	653	2.62373	R	T	R	V	P	R	A	E	S	A	D	S	L	G	S	E	D	PKPGKFQRTRVPRAESADSLGSEDRDLLYSI	Q8K298	653	14-3-3 domain binding motif;b-Adrenergic Receptor kinase substrate motif;Calmodulin-dependent protein kinase I substrate motif;Calmodulin-dependent protein kinase II substrate motif;Calmodulin-dependent protein kinase IV substrate motif;Casein kinase I substrate motif;Casein kinase II substrate motif;Chk1 kinase substrate motif;PKA kinase substrate motif;PKC kinase substrate motif	AES(1)ADSLGSEDRDLLYSIDAYR	94.542	0.999902	0.858299	1.4653	1.55123	1.69166	1.39162	7.0032	99.838	3	842.706	0.13704
Dclk1		S	358	2.61384	P	L	S	S	D	D	L	D	S	V	G	D	S	V	_	_	_	KQRDLYRPLSSDDLDSVGDSV__________	Q3UGP0;Q80VB6;Q8VDT3;A8IP62	358;358;358;51	b-Adrenergic Receptor kinase substrate motif;Casein kinase I substrate motif;Casein kinase II substrate motif;G protein-coupled receptor kinase 1 substrate motif;GSK3 kinase substrate motif;Pyruvate dehydrogenase kinase substrate motif	DLYRPLSSDDLDS(1)VGDSV	125.77	0.999957	0.54745	2.00371	NaN	1.60735	1.38617	7.54225	125.77	2	1016.94	-2.7172
Smap	Small acidic protein	S	17	2.59316	P	H	G	V	K	R	S	A	S	P	D	D	D	L	G	S	S	SAARESHPHGVKRSASPDDDLGSSNWEAADL	Q9R0P4;D6RI64	17;17	14-3-3 domain binding motif;Calmodulin-dependent protein kinase II substrate motif;Calmodulin-dependent protein kinase IV substrate motif;Casein kinase II substrate motif;Chk1 kinase substrate motif;ERK1,2 kinase substrate motif;GSK-3, ERK1, ERK2, CDK5 substrate motif;PKA kinase substrate motif;PKC kinase substrate motif;Pyruvate dehydrogenase kinase substrate motif;WW domain binding motif	S(0.106)AS(0.894)PDDDLGSSNWEAADLGNEERK	115.76	0.894139	1.39193	1.37373	1.11057	1.6226	1.37471	8.83379	288.57	3	881.7	0.58723
Bud13	BUD13 homolog	T	144	2.52929	P	P	R	K	A	R	H	D	T	P	D	P	S	P	P	R	K	HDTPDTSPPRKARHDTPDPSPPRKARHDTPD	Q8R149	144	b-Adrenergic Receptor kinase substrate motif;Calmodulin-dependent protein kinase II substrate motif;G protein-coupled receptor kinase 1 substrate motif;GSK-3, ERK1, ERK2, CDK5 substrate motif;PKC kinase substrate motif;WW domain binding motif	HDT(1)PDPS(1)PPR	132.86	1	NaN	1.34301	1.33475	1.33843	1.33873	7.39354	132.86	2	639.731	-0.52316
Ccdc88a	Girdin	S	1822	2.5061	A	E	G	T	T	R	R	T	S	I	H	D	F	L	S	K	D	ASSVISTAEGTTRRTSIHDFLSKDSRLPVSV	Q5SNZ0;E9Q052;Q6ZPV9	1822;707;676	14-3-3 domain binding motif;Aurora-A kinase substrate motif;Calmodulin-dependent protein kinase II substrate motif;Casein kinase II substrate motif;PAK2 kinase substrate motif;Phosphorylase kinase substrate motif;PKA kinase substrate motif;PKC epsilon kinase substrate motif;PKC kinase substrate motif;Pyruvate dehydrogenase kinase substrate motif	RT(0.032)S(0.968)IHDFLSK	78.488	0.96813	1.44663	0.500394	1.88316	1.47161	1.32545	7.34639	86.803	3	428.543	0.014254
Dstn	Destrin	S	3	2.48905	_	_	_	_	_	_	M	A	S	G	V	Q	V	A	D	E	V	_____________MASGVQVADEVCRIFYDM	Q4FK36;Q9R0P5	3;3		AS(1)GVQVADEVCR	178	1	1.12974	-0.854805	2.61352	2.37392	1.3156	8.94565	195.89	2	706.797	0.61596
Hdac4	Histone deacetylase 4	S	629	2.41554	H	R	P	L	S	R	A	Q	S	S	P	A	S	A	T	F	P	IPVSFGSHRPLSRAQSSPASATFPMSVQEPP	Q6NZM9	629	14-3-3 domain binding motif;Calmodulin-dependent protein kinase II substrate motif;Calmodulin-dependent protein kinase IV substrate motif;Chk1 kinase substrate motif;G protein-coupled receptor kinase 1 substrate motif;GSK3 kinase substrate motif;MAPKAPK2 kinase substrate motif;PKA kinase substrate motif;PKC kinase substrate motif	AQS(0.996)S(0.004)PASATFPMSVQEPPTKPR	86.182	0.996121	0.265797	NaN	-0.0765591	3.62781	1.27235	7.77937	86.182	3	798.71	-0.28776
Smap	Small acidic protein	S	15	2.41436	S	H	P	H	G	V	K	R	S	A	S	P	D	D	D	L	G	_MSAARESHPHGVKRSASPDDDLGSSNWEAA	Q9R0P4;D6RI64	15;15	Casein kinase II substrate motif;PKA kinase substrate motif;PKC kinase substrate motif	S(0.867)AS(0.133)PDDDLGSSNWEAADLGNEER	247.64	0.866653	1.36396	1.33674	1.26892	1.11694	1.27164	8.65777	288.57	3	839.001	0.16476
Exoc1		S	448	2.40549	S	K	K	F	G	L	H	G	S	S	G	K	L	T	G	S	T	MTGTSKESKKFGLHGSSGKLTGSTSSLNKLS	Q3U1G4;Q5PPR2	448;448		FGLHGS(0.999)S(0.001)GK	72.2	0.998999	1.08038	1.06205	1.47983	1.44305	1.26633	7.91347	147.62	2	485.213	0.15275
Rbm8a	RNA-binding protein 8A	S	56	2.36305	A	R	M	R	E	D	Y	D	S	V	E	Q	D	G	D	E	P	GSKEGSRARMREDYDSVEQDGDEPGPQRSVE	Q9CWZ3	56	b-Adrenergic Receptor kinase substrate motif;Casein kinase I substrate motif;Casein kinase II substrate motif	MREDY(0.114)DS(0.886)VEQDGDEPGPQR	88.755	0.8863	1.08604	1.48207	0.940783	1.45372	1.24065	7.41964	120.41	3	768.302	0.56942
Ahnak2		T	540	2.35663	P	Q	V	Q	G	D	L	K	T	P	D	L	S	V	Q	L	P	VEADVAPPQVQGDLKTPDLSVQLPSADLELK	E9PYB0;F7CVJ5	540;174	Casein kinase I substrate motif;G protein-coupled receptor kinase 1 substrate motif;Growth associated histone HI kinase substrate motif;GSK-3, ERK1, ERK2, CDK5 substrate motif;WW domain binding motif	VEADVAPPQVQGDLKT(0.999)PDLS(0.001)VQLPSADLELK	108.05	0.999395	1.29408	1.46069	0.863704	1.32844	1.23673	8.39389	116.24	3	1118.24	0.059941
Rapgef2	Rap guanine nucleotide exchange factor 2	S	1037	2.29577	K	K	P	V	K	S	E	T	S	P	V	A	P	R	A	G	P	LPKNPGDKKPVKSETSPVAPRAGPQQKVQPQ	Q6NXI4;Q8CHG7;E9QNQ4	1037;1022;1020	ERK1,2 kinase substrate motif;G protein-coupled receptor kinase 1 substrate motif;GSK-3, ERK1, ERK2, CDK5 substrate motif;PKA kinase substrate motif;WW domain binding motif	SET(0.004)S(0.996)PVAPR	155.15	0.996221	-0.420048	NaN	2.03641	1.98057	1.19898	7.36579	155.15	2	512.229	0.83815
Rdbp	Negative elongation factor E	S	115	2.25716	F	Q	P	F	Q	R	S	M	S	A	D	E	D	L	Q	E	P	EKGPVPTFQPFQRSMSADEDLQEPSRRPQRK	P19426;Q3UIA1;G3UY39	115;115;115	14-3-3 domain binding motif;Calmodulin-dependent protein kinase II substrate motif;Calmodulin-dependent protein kinase IV substrate motif;Casein kinase II substrate motif;PKA kinase substrate motif;PKC kinase substrate motif	S(0.001)MS(0.999)ADEDLQEPSR	222.42	0.999309	1.08188	1.42471	0.955732	1.23572	1.17451	7.79601	222.42	2	780.798	0.25004
Dnmt1	Cytosine-specific methyltransferase	S	138	2.24947	R	K	P	R	G	P	R	R	S	K	S	D	S	D	T	L	F	NRSPRSRRKPRGPRRSKSDSDTLFETSPSSV	Q3UHZ3;Q3UWN4	138;20	Casein kinase II substrate motif;G protein-coupled receptor kinase 1 substrate motif;GSK3 kinase substrate motif;PKA kinase substrate motif;PKC kinase substrate motif;Pyruvate dehydrogenase kinase substrate motif	S(0.856)KS(0.144)DS(0.001)DTLFETSPSSVATR	78.451	0.855503	1.26795	1.29172	0.949087	NaN	1.16959	7.01127	87.411	2	1047.96	-0.46545
Ahnak2		S	544	2.21612	G	D	L	K	T	P	D	L	S	V	Q	L	P	S	A	D	L	VAPPQVQGDLKTPDLSVQLPSADLELKAGQV	E9PYB0;F7CVJ5	544;178	G protein-coupled receptor kinase 1 substrate motif	VEADVAPPQVQGDLKT(0.069)PDLS(0.931)VQLPS(0.001)ADLELK	60.419	0.930685	NaN	1.53744	1.16773	0.738939	1.14804	7.35292	63.291	4	838.929	-0.10352
Pfkl	6-phosphofructokinase, liver type	S	775	2.21452	E	H	V	T	R	R	T	L	S	I	D	K	G	F	_	_	_	DYVSGELEHVTRRTLSIDKGF__________	P12382;Q8CD98	775;460	14-3-3 domain binding motif;Calmodulin-dependent protein kinase II substrate motif;Phosphorylase kinase substrate motif;PKA kinase substrate motif;PKC kinase substrate motif;ZIP kinase substrate motif	TLS(1)IDKGF	107.83	0.999902	NaN	1.38444	0.798818	1.25774	1.147	7.63719	107.83	2	480.726	-0.14894
Pdcd4	Programmed cell death protein 4	T	93	2.19758	V	R	S	G	V	A	V	P	T	S	P	K	G	R	L	L	D	SDNGSEAVRSGVAVPTSPKGRLLDRRSRSGK	Q61823	93	DNA dependent Protein kinase substrate motif	SGVAVPT(0.5)S(0.5)PKGR	118.51	0.5	0.882839	4.15348	0.115597	-0.608242	1.13592	8.18398	118.51	2	618.311	-1.0635
Raver1	Ribonucleoprotein PTB-binding 1	T	23	2.17037	P	E	A	E	A	E	A	E	T	P	E	T	V	D	R	R	A	THRPPLSPEAEAEAETPETVDRRAPEQELPP	Q9CW46	23	b-Adrenergic Receptor kinase substrate motif;Casein kinase I substrate motif;GSK-3, ERK1, ERK2, CDK5 substrate motif;WW domain binding motif	AADVSVTHRPPLS(1)PEAEAEAET(0.992)PET(0.008)VDR	123.52	0.992219	1.22385	1.04956	1.00078	1.19757	1.11794	7.744	123.52	3	1059.47	-0.089639
Ppp1r12a	Protein phosphatase 1 regulatory subunit 12A;Protein phosphatase 1 regulatory subunit 12B	S	693	2.16333	R	Q	A	R	Q	S	R	R	S	T	Q	G	V	T	L	T	D	SQRKARSRQARQSRRSTQGVTLTDLQEAEKT	Q9DBR7;Q3TS88;A6H644;Q8BG95;F6UIT9	693;170;644;644;50	PKA kinase substrate motif;PKC kinase substrate motif	RS(0.702)T(0.298)QGVTLTDLQEAEK	192.32	0.702296	NaN	0.120883	1.6439	1.57497	1.11325	7.47738	192.32	3	619.298	-0.36291
Dock7	Dedicator of cytokinesis protein 7	S	898	2.14956	N	L	N	R	S	R	S	L	S	N	S	N	P	D	I	S	G	AVRPASLNLNRSRSLSNSNPDISGTPTSPDD	Q8R1A4;A2A9M5;E9PX48;A2AW79;F6ZJ55;A2AW80	898;898;898;165;183;182	14-3-3 domain binding motif;Akt kinase substrate motif;Calmodulin-dependent protein kinase II substrate motif;Casein kinase II substrate motif;G protein-coupled receptor kinase 1 substrate motif;MAPKAPK1 kinase substrate motif;MAPKAPK2 kinase substrate motif;PKA kinase substrate motif;PKC kinase substrate motif	S(0.315)RS(0.798)LS(0.798)NS(0.088)NPDISGTPTSPDDEVR	118.36	0.798451	1.16909	0.900413	1.15082	1.19585	1.10404	7.63557	255.58	3	864.36	0.46993
Rfc1	Replication factor C subunit 1	S	258	2.13785	K	I	K	K	A	R	K	D	S	E	E	G	E	E	S	F	S	ALLDEEPKIKKARKDSEEGEESFSSVQDDLS	G3UXL4;Q5U4B1;G3X8Z6;P35601;G3UWX1;E9PX26;Q3UJT6;Q61944;Q3UVT8	258;244;244;244;244;244;244;186;244	14-3-3 domain binding motif;b-Adrenergic Receptor kinase substrate motif;Calmodulin-dependent protein kinase II substrate motif;Casein kinase II substrate motif;G protein-coupled receptor kinase 1 substrate motif;MAPKAPK1 kinase substrate motif;PKA kinase substrate motif;PKC epsilon kinase substrate motif;PKC kinase substrate motif	KDS(1)EEGEESFSSVQDDLSK	141.15	1	1.1137	1.23921	NaN	0.935558	1.09616	7.38977	147.17	2	1098.45	2.2193
Cast	Calpastatin	S	444	2.13424	P	E	E	T	S	K	S	L	S	E	S	E	L	I	G	E	L	GKPLLPEPEETSKSLSESELIGELSADFDRS	P51125;Q8CE80;Q8CE04;Q8C281;Q8CB83;Q921U7;Q3TTN2	444;410;361;342;342;342;87	Casein kinase II substrate motif;G protein-coupled receptor kinase 1 substrate motif;MAPKAPK2 kinase substrate motif;PKA kinase substrate motif;PKC kinase substrate motif	S(0.153)LS(0.836)ES(0.012)ELIGELSADFDR	190.83	0.835553	NaN	1.06178	0.873873	1.34553	1.09373	7.12195	251.13	2	974.433	-0.23999
Cep170	Centrosomal protein of 170 kDa	S	1104	2.10637	A	R	L	G	E	A	S	D	S	E	L	A	D	A	D	K	A	RTSLLRRARLGEASDSELADADKASVASEVS	Q6A065;H7BX26	1104;1104	b-Adrenergic Receptor kinase substrate motif;G protein-coupled receptor kinase 1 substrate motif	ARLGEAS(0.202)DS(0.798)ELADADK	81.346	0.798129	0.359634	-0.168398	3.03304	NaN	1.07476	7.66024	83.213	2	864.378	-1.2826
Wdhd1	WD repeat and HMG-box DNA-binding protein 1	T	819	2.07461	E	K	A	A	E	L	A	E	T	Q	S	E	E	E	K	E	E	KLSELAAEKAAELAETQSEEEKEEDFREKLN	E9QPB3;P59328	819;819	b-Adrenergic Receptor kinase substrate motif;Casein kinase II substrate motif	AAELAET(0.839)QS(0.161)EEEKEEDFREK	80.316	0.839289	0.984334	1.13836	1.00642	1.08225	1.05284	8.06744	109.04	3	816.687	0.019587
Ppp1r12a	Protein phosphatase 1 regulatory subunit 12A;Protein phosphatase 1 regulatory subunit 12B	T	694	2.07109	Q	A	R	Q	S	R	R	S	T	Q	G	V	T	L	T	D	L	QRKARSRQARQSRRSTQGVTLTDLQEAEKTI	Q9DBR7;Q3TS88;A6H644;Q8BG95;F6UIT9	694;171;645;645;51	Calmodulin-dependent protein kinase II substrate motif;Casein kinase I substrate motif;G protein-coupled receptor kinase 1 substrate motif;MAPKAPK2 kinase substrate motif;MDC1 BRCT domain binding motif;PAK2 kinase substrate motif;PKA kinase substrate motif;PKC kinase substrate motif;Plk1 PBD domain binding motif	RS(0.031)T(0.969)QGVTLTDLQEAEK	141.83	0.968747	0.674822	0.0710762	1.94259	1.51309	1.05039	8.15552	193.59	2	928.443	0.75451
Vim	Vimentin	S	83	2.05242	P	G	V	R	L	L	Q	D	S	V	D	F	S	L	A	D	A	VRLRSSVPGVRLLQDSVDFSLADAINTEFKN	P20152;Q3U6S1;Q3UAX1;Q5FWJ3;E9PZV5;Q3TFD9;Q3UD36;Q3V2S4;Q3TWV0;A4IF59;A2AKJ2	83;83;83;83;70;83;22;83;83;83;83	b-Adrenergic Receptor kinase substrate motif;Casein kinase I substrate motif;G protein-coupled receptor kinase 1 substrate motif;GSK3 kinase substrate motif	LLQDS(1)VDFSLADAINTEFK	258.87	1	0.476122	NaN	1.44454	1.19133	1.03733	7.2948	268.45	2	1103.52	0.10758
Slk	STE20-like serine/threonine-protein kinase	S	340	2.02937	P	I	P	A	N	K	R	A	S	S	D	L	S	I	A	S	S	EEAENALPIPANKRASSDLSIASSEEDKLSQ	O54988;A2RRK3	340;340	Casein kinase I substrate motif;G protein-coupled receptor kinase 1 substrate motif;GSK3 kinase substrate motif;PAK2 kinase substrate motif;PKA kinase substrate motif;PKC kinase substrate motif	RAS(0.997)S(0.003)DLSIASSEEDK	180.8	0.996804	NaN	-0.0451635	1.60995	1.4983	1.02103	7.2244	224.59	2	837.865	-0.14589
Ahnak		S	2656	2.00795	L	P	N	A	D	L	D	V	S	G	P	K	V	D	I	D	V	GPEVDVSLPNADLDVSGPKVDIDVPDVNIEG	E9Q616;F7BRM2;A0JLR7	2656;1591;260		GEGPEVDVSLPNADLDVS(1)GPK	221.8	1	0.753177	1.0695	1.06879	1.13144	1.00572	7.55241	249.24	2	1088	1.3609
Zyx	Zyxin	S	144	2.00321	P	Q	P	R	E	K	V	C	S	I	D	L	E	I	D	S	L	EAPTQLPPQPREKVCSIDLEIDSLSSLLDDM	Q3TCR9;Q62523;Q8CBM0;Q8CD55;E9Q625	144;144;144;88;144	Phosphorylase kinase substrate motif;PKA kinase substrate motif;PKC kinase substrate motif	VCS(1)IDLEIDSLSSLLDDMTK	257.1	1	0.907583	0.395392	1.70397	NaN	1.00232	7.13621	257.1	2	1167.53	0.65771
Ccdc6	Coiled-coil domain-containing protein 6	S	237	1.99785	D	Q	P	V	S	A	P	P	S	P	R	D	I	S	M	E	I	RILQEKLDQPVSAPPSPRDISMEIDSPENMM	D3YZP9	237	Casein kinase II substrate motif;DNA dependent Protein kinase substrate motif;ERK1,2 kinase substrate motif;Growth associated histone HI kinase substrate motif;GSK-3, ERK1, ERK2, CDK5 substrate motif;MAPKAPK2 kinase substrate motif;PKA kinase substrate motif;PKC kinase substrate motif;Pyruvate dehydrogenase kinase substrate motif;WW domain binding motif	LDQPVS(1)APPS(1)PR	130.11	1	0.040121	-0.249771	0.276957	3.92649	0.99845	8.03117	142.26	2	712.305	-0.5018
Ahnak		S	2000	1.98871	L	E	G	E	L	K	G	P	S	V	D	V	E	V	P	D	V	MDVTVPKLEGELKGPSVDVEVPDVDLECPDA	E9Q616	2000	DNA dependent Protein kinase substrate motif;Phosphorylase kinase substrate motif;PKA kinase substrate motif;PKC kinase substrate motif	LEGELKGPS(1)VDVEVPDVDLECPDAK	103.03	1	1.07403	1.60322	0.863992	0.426083	0.991829	8.34653	154.7	3	930.765	0.43947
Wdhd1	WD repeat and HMG-box DNA-binding protein 1	S	821	1.9879	A	A	E	L	A	E	T	Q	S	E	E	E	K	E	E	D	F	SELAAEKAAELAETQSEEEKEEDFREKLNAG	E9QPB3;P59328	821;821	BARD1 BRCT domain binding motif;Casein kinase I substrate motif;Casein kinase II substrate motif;G protein-coupled receptor kinase 1 substrate motif	AAELAET(0.007)QS(0.993)EEEKEEDFREK	111.33	0.992713	1.13737	0.960363	0.834159	1.0331	0.991248	8.31319	111.33	3	816.687	0.23445
Dock7	Dedicator of cytokinesis protein 7	S	896	1.97506	S	L	N	L	N	R	S	R	S	L	S	N	S	N	P	D	I	RSAVRPASLNLNRSRSLSNSNPDISGTPTSP	Q8R1A4;A2A9M5;E9PX48;A2AW79;F6ZJ55;A2AW80	896;896;896;163;181;180	14-3-3 domain binding motif;Calmodulin-dependent protein kinase II alpha substrate motif;Calmodulin-dependent protein kinase II substrate motif;Calmodulin-dependent protein kinase IV substrate motif;Casein kinase II substrate motif;Chk1 kinase substrate motif;G protein-coupled receptor kinase 1 substrate motif;GSK3 kinase substrate motif;Phosphorylase kinase substrate motif;PKA kinase substrate m…	S(0.315)RS(0.798)LS(0.798)NS(0.088)NPDISGTPTSPDDEVR	118.36	0.798451	1.16909	0.575215	0.987446	1.19585	0.9819	7.64704	255.58	3	864.36	0.46993
Epb4.1l3		T	477	1.95173	Q	T	N	L	I	T	T	V	T	P	E	K	K	A	E	E	E	ATTKGISQTNLITTVTPEKKAEEERVEEEDR	A7YY80;D0VYV7;E9PV52;Q8BGK4;F8WH44;D0VYV6;E9QN88	495;495;495;495;477;477;477	Cdc2 kinase substrate motif;CDK1,2,4,6 kinase substrate motif;CDK5 kinase substrate motif;GSK-3, ERK1, ERK2, CDK5 substrate motif;WW domain binding motif	GISQTNLITTVT(1)PEK	183.65	0.999996	0.948526	0.758474	1.30187	0.850142	0.964753	8.08625	183.65	2	841.424	-0.18301
Basp1	Brain acid soluble protein 1	S	92	1.91757	A	P	K	A	E	P	E	K	S	E	G	A	A	E	E	Q	P	AAAAKEEAPKAEPEKSEGAAEEQPEPAPAPE	Q91XV3	92	G protein-coupled receptor kinase 1 substrate motif	AEPEKS(1)EGAAEEQPEPAPAPEQEAAAPGPAAGGEAPK	98.367	1	1.03309	0.839395	0.992604	0.892018	0.939276	7.82729	98.367	3	1215.88	0.1096
Rab11fip1	Rab11 family-interacting protein 1	S	358	1.91529	F	R	R	K	H	L	F	S	S	T	E	N	L	A	A	R	S	NSPSPQGFRRKHLFSSTENLAARSPKEPGEG	E9Q8L9;Q9D620	358;358	Casein kinase II substrate motif;MDC1 BRCT domain binding motif;Plk1 PBD domain binding motif	HLFS(0.003)S(0.962)T(0.035)ENLAAR	148.41	0.962135	NaN	0.875623	0.792332	1.14474	0.937566	7.53323	148.41	2	713.33	-0.44656
Arhgef2	Rho guanine nucleotide exchange factor 2	S	959	1.91259	S	S	R	L	S	P	P	H	S	P	R	D	F	T	R	M	Q	TGSEEEVSSRLSPPHSPRDFTRMQDIPEETE	Q60875;H3BKH9;H3BJ40;H3BJ45;H3BJX8;H3BJU7	959;957;944;942;942;930	Casein kinase II substrate motif;ERK1,2 kinase substrate motif;Growth associated histone HI kinase substrate motif;GSK-3, ERK1, ERK2, CDK5 substrate motif;MAPKAPK2 kinase substrate motif;PKA kinase substrate motif;PKC kinase substrate motif;Pyruvate dehydrogenase kinase substrate motif;WW domain binding motif	LQDSSDPDT(0.017)GS(0.017)EEEVS(0.157)S(0.748)RLS(0.065)PPHS(0.996)PR	76.049	0.995907	1.53356	1.39138	NaN	-0.11836	0.935529	7.71646	76.049	3	990.411	0.54853
Sptbn1	Spectrin beta chain, brain 1	T	2327	1.90965	T	P	A	S	S	R	A	Q	T	L	P	T	S	V	V	T	I	TSASTQSTPASSRAQTLPTSVVTITSESSPG	Q62261;Q8BQ35;Q8R1C2	2327;461;96	Calmodulin-dependent protein kinase II substrate motif;Casein kinase I substrate motif;G protein-coupled receptor kinase 1 substrate motif;MAPKAPK2 kinase substrate motif;PKC kinase substrate motif	AQT(0.999)LPTSVVTITSESSPGKR	44.183	0.998542	0.675726	0.344942	1.34722	1.36535	0.933308	7.43675	88.565	3	713.695	0.64192
Tjp1	Tight junction protein ZO-1	S	617	1.88695	S	S	K	R	N	L	R	K	S	R	E	D	L	S	A	Q	P	WRFRGLRSSKRNLRKSREDLSAQPVQTKFPA	B9EHJ3;P39447	617;617	Casein kinase II substrate motif;PKA kinase substrate motif;PKC kinase substrate motif;Pyruvate dehydrogenase kinase substrate motif	S(1)REDLSAQPVQTK	105.89	0.999972	1.12386	0.637193	0.865122	1.03804	0.916054	7.98859	127.56	2	769.864	-0.95072
Thrap3	Thyroid hormone receptor-associated protein 3	S	572	1.86972	A	Q	V	N	V	R	M	D	S	F	D	E	D	L	A	R	P	SFSITREAQVNVRMDSFDEDLARPSGLLAQE	A2AJI4;Q569Z6;Q8BZN7;Q91VL2	572;572;572;186	14-3-3 domain binding motif;b-Adrenergic Receptor kinase substrate motif;Calmodulin-dependent protein kinase II substrate motif;Casein kinase II substrate motif;MAPKAPK2 kinase substrate motif;PKA kinase substrate motif;PKC kinase substrate motif	MDS(1)FDEDLARPSGLLAQER	65.887	0.999987	NaN	1.86362	0.666485	0.178355	0.90282	7.36434	81.346	3	749.331	-0.39869
Vim	Vimentin	S	430	1.86611	N	L	R	E	T	N	L	E	S	L	P	L	V	D	T	H	S	LPTFSSLNLRETNLESLPLVDTHSKRTLLIK	P20152;Q3U6S1;Q3UAX1;Q5FWJ3;E9PZV5;Q3TFD9;Q3UD36;Q3V2S4;Q3TWV0	430;430;430;430;417;430;369;430;430	b-Adrenergic Receptor kinase substrate motif	ET(0.168)NLES(0.828)LPLVDT(0.003)HS(0.001)K	46.797	0.827734	1.3352	-0.0915099	1.4564	NaN	0.900031	7.43001	55.588	3	588.28	0.14704
Cald1		T	478	1.86028	A	S	G	T	P	N	K	E	T	A	G	L	K	V	G	V	S	SVFSAPSASGTPNKETAGLKVGVSSRINEWL	E9QA16;Q8VCQ8;E9QA15;D3Z6I7;E9Q0M9;Q3UGC3	478;472;710;496;476;329	b-Adrenergic Receptor kinase substrate motif;PKA kinase substrate motif;PKC kinase substrate motif	GSVFSAPS(0.009)AS(0.01)GT(0.042)PNKET(0.94)AGLK	77.221	0.939668	0.96997	-0.755259	2.47185	NaN	0.89552	7.49752	81.428	3	696	-0.42698
Pak1	Serine/threonine-protein kinase PAK 1	T	229	1.83966	I	S	P	T	E	N	N	T	T	P	P	D	A	L	T	R	N	RDVATSPISPTENNTTPPDALTRNTEKQKKK	G5E884;O88643	229;230	Casein kinase II substrate motif;G protein-coupled receptor kinase 1 substrate motif;GSK-3, ERK1, ERK2, CDK5 substrate motif;WW domain binding motif	DVATSPISPTENNTT(1)PPDALTR	221.51	0.99995	1.00547	0.669208	1.03434	0.808741	0.87944	8.15746	244.71	2	1189.05	0.61844
Ddx54	ATP-dependent RNA helicase DDX54	S	74	1.8365	S	F	P	T	S	E	C	V	S	D	V	E	P	D	T	R	E	GPGRALPSFPTSECVSDVEPDTREMVRAQNK	Q8CD14;F8WIL7;Q8CD39;Q8K4L0	74;74;74;74	Casein kinase I substrate motif;Casein kinase II substrate motif;G protein-coupled receptor kinase 1 substrate motif;MAPKAPK2 kinase substrate motif	ALPSFPTSECVS(1)DVEPDTR	272.71	1	2.55976	1.41986	-0.374177	-0.0976109	0.876959	8.39926	272.71	2	1093.97	-0.8811
Npm1	Nucleophosmin	S	4	1.82605	_	_	_	_	_	M	E	D	S	M	D	M	D	M	S	P	L	____________MEDSMDMDMSPLRPQNYLF	Q5SQB7;Q5U438;Q61937;Q5SQB5;Q9DAY9;Q5SQB0;Q3U536;Q8BSZ3;Q3UDA7	4;4;4;4;4;4;4;4;4	b-Adrenergic Receptor kinase substrate motif	MEDS(1)MDMDMSPLRPQNYLFGCELK	154.7	1	0.647453	0.884559	0.940285	1.0026	0.868724	9.14696	189.51	3	1026.41	-0.11358
Fermt2	Fermitin family homolog 2	S	159	1.81887	K	K	K	K	L	D	D	Q	S	E	D	E	A	L	E	L	E	PRDPTKKKKKKLDDQSEDEALELEGPLIMPG	F8WGQ4;Q3TLE2;Q8CIB5	159;159;159	BARD1 BRCT domain binding motif;Casein kinase I substrate motif;Casein kinase II substrate motif;G protein-coupled receptor kinase 1 substrate motif	KLDDQS(1)EDEALELEGPLIMPGSGSIYSSPGLYSK	95.993	1	0.205643	1.14587	1.02779	1.07285	0.863039	7.34323	107.29	3	1235.91	0.63971
Pea15	Astrocytic phosphoprotein PEA-15	S	116	1.80202	Y	K	D	I	I	R	Q	P	S	E	E	E	I	I	K	L	A	RIPSAKKYKDIIRQPSEEEIIKLAPPPKKA_	Q62048	116	14-3-3 domain binding motif;AMP-activated protein kinase substrate motif;BARD1 BRCT domain binding motif;Calmodulin-dependent protein kinase I substrate motif;Calmodulin-dependent protein kinase II substrate motif;Calmodulin-dependent protein kinase IV substrate motif;Casein kinase II substrate motif;Chk1 kinase substrate motif;DNA dependent Protein kinase substrate motif;G protein-coupled recept…	DIIRQPS(1)EEEIIK	100.77	1	1.20508	1.28297	0.818808	0.0915868	0.849612	8.46587	119.46	2	825.411	-0.012001
Hdgfrp2	Hepatoma-derived growth factor-related protein 2	S	450	1.78722	K	V	E	R	T	R	K	R	S	E	G	L	S	L	E	R	K	KPRARPVKVERTRKRSEGLSLERKGEKKKEP	Q3UMU9;D6CHX5	450;397	14-3-3 domain binding motif;Akt kinase substrate motif;Calmodulin-dependent protein kinase II substrate motif;Casein kinase I substrate motif;G protein-coupled receptor kinase 1 substrate motif;GSK3 kinase substrate motif;MAPKAPK1 kinase substrate motif;PKA kinase substrate motif;PKC epsilon kinase substrate motif;PKC kinase substrate motif	RS(1)EGLSLER	134.99	0.999993	0.506399	-0.0198284	1.52679	1.33752	0.837719	7.71053	134.99	2	563.766	-0.37894
Ssfa2	Sperm-specific antigen 2 homolog	S	465	1.77655	N	I	M	T	Q	Q	K	D	S	F	E	M	E	E	V	Q	S	LTIPSIRNIMTQQKDSFEMEEVQSTEGEAPH	Q922B9;A2AQD5;A2AQD6;Q3TEM8	465;465;465;465	b-Adrenergic Receptor kinase substrate motif;Casein kinase II substrate motif;PKA kinase substrate motif;PKC kinase substrate motif	DS(1)FEMEEVQSTEGEAPHVPATCQLSLAK	74.838	0.999996	1.79227	NaN	0.292422	0.402531	0.829075	7.09538	102.03	3	1057.46	0.95208
Vim	Vimentin	T	426	1.76778	F	S	S	L	N	L	R	E	T	N	L	E	S	L	P	L	V	ISLPLPTFSSLNLRETNLESLPLVDTHSKRT	P20152;Q3U6S1;Q3UAX1;Q5FWJ3;E9PZV5;Q3TFD9;Q3UD36;Q3V2S4;Q3TWV0	426;426;426;426;413;426;365;426;426	b-Adrenergic Receptor kinase substrate motif;Casein kinase I substrate motif;Casein kinase II substrate motif;G protein-coupled receptor kinase 1 substrate motif;PKA kinase substrate motif;PKC kinase substrate motif	ET(0.829)NLES(0.169)LPLVDT(0.002)HSK	55.437	0.82902	1.04509	-0.0777717	1.4547	0.865726	0.821938	7.53046	57.616	3	588.28	0.29198
Ctnnd1	Catenin delta-1	S	349	1.7668	Q	H	E	R	G	S	L	A	S	L	D	S	L	R	K	G	M	YYWAPLAQHERGSLASLDSLRKGMPPPSNWR	E9Q8Z8;E9Q8Z6;E9Q8Z5;P30999;G3X9V2;E9Q904;E9Q901;E9Q903;D3Z2H2;E9Q8Z9;E9Q8Z4;E9Q905;E9Q907;E9Q906;D3Z7H6;E9Q986;Q3TPD1;D3Z2H7;Q3UF77	349;349;349;349;349;295;295;295;295;295;285;248;248;248;248;248;349;26;85	Casein kinase I substrate motif;Casein kinase II substrate motif	GSLAS(1)LDS(1)LRK	128.71	1	0.909811	1.25912	-0.560324	1.67595	0.82114	7.88973	128.71	2	653.794	-0.32273
Rab11fip1		S	881	1.75185	L	P	S	I	P	E	V	A	S	D	D	E	R	V	D	E	V	IADLSLSLPSIPEVASDDERVDEVGDGGKAE	E9Q8L9	881	BARD1 BRCT domain binding motif;Casein kinase I substrate motif;Casein kinase II substrate motif	SPIIADLSLSLPSIPEVAS(1)DDERVDEVGDGGK	150.36	0.999983	0.788602	0.936892	0.701154	NaN	0.808883	7.8959	160.88	3	1120.87	-0.46389
Eif3b	Eukaryotic translation initiation factor 3 subunit B	S	141	1.75044	E	N	G	E	A	D	E	P	S	F	S	D	P	E	D	F	V	EAEPRALENGEADEPSFSDPEDFVDDVSEEE	Q8CIJ3;E9PX78;Q8JZQ9	141;141;141	Casein kinase I substrate motif;Casein kinase II substrate motif;DNA dependent Protein kinase substrate motif;G protein-coupled receptor kinase 1 substrate motif;Pyruvate dehydrogenase kinase substrate motif	ALENGEADEPS(1)FS(1)DPEDFVDDVS(1)EEELLGDVLK	96.598	1	0.675906	0.961623	NaN	0.785627	0.807719	7.42506	163.09	3	1283.84	-0.10268
Zranb2	Zinc finger Ran-binding domain-containing protein 2	S	198	1.7466	L	S	K	Y	N	L	D	A	S	E	E	E	D	S	N	K	K	EDEDDADLSKYNLDASEEEDSNKKKSNRRSR	D3Z4T9;B2RRT9;D3Z4U0;Q9R020;E9PUD0	198;188;198;188;151	BARD1 BRCT domain binding motif;Casein kinase II substrate motif;G protein-coupled receptor kinase 1 substrate motif	YNLDAS(1)EEEDSNKK	221.37	1	0.833416	0.821384	0.77253	0.790859	0.804547	8.75831	252.38	2	861.349	-0.32908
Hmgn1	Non-histone chromosomal protein HMG-14	S	87	1.74184	E	T	E	N	Q	S	P	A	S	E	E	E	K	E	A	K	S	ELPAENGETENQSPASEEEKEAKSD______	P18608;Q8CEW1;D3Z607	87;87;77	BARD1 BRCT domain binding motif;Casein kinase II substrate motif;G protein-coupled receptor kinase 1 substrate motif	QADVADQQTTELPAENGET(0.002)ENQS(0.013)PAS(0.985)EEEK	118.9	0.985207	0.663846	0.578794	1.05772	0.902093	0.800614	8.20914	124.09	3	1109.13	-0.035883
Ahnak2		S	134	1.72659	K	M	P	K	F	K	M	P	S	F	G	V	S	A	P	G	K	AAKDSKFKMPKFKMPSFGVSAPGKPSLEASL;VAKDSKFKMPKFKMPSFGVSAPGKPSLEASL	E9PYB0;F7CVJ5;F7DBB3	503;137;134	DNA dependent Protein kinase substrate motif;DNA dependent Protein kinase substrate motif;G protein-coupled receptor kinase 1 substrate motif;G protein-coupled receptor kinase 1 substrate motif;GSK3 kinase substrate motif;GSK3 kinase substrate motif;PKA kinase substrate motif;PKA kinase substrate motif;PKC kinase substrate motif;PKC kinase substrate motif	MPS(1)FGVSAPGKPSLEASLEVGAPK	157.68	1	1.18422	1.13199	0.492769	0.342726	0.787924	8.33504	157.68	3	812.734	-0.35685
Ahnak		S	5512	1.72257	S	P	E	A	S	I	S	G	S	K	G	D	L	K	S	S	K	GKGGVTGSPEASISGSKGDLKSSKASLGSLE	E9Q616;Q8VDN3;E9Q1H8;Q6UIL4;Q8CGE7	5512;880;593;533;521	Casein kinase II substrate motif;MAPKAPK2 kinase substrate motif;Pyruvate dehydrogenase kinase substrate motif	GGVTGS(1)PEASISGS(1)K	238.69	0.999997	0.92691	0.480472	0.9015	0.829357	0.78456	9.139	239.22	2	747.3	-0.0058625
Ehd2	EH domain-containing protein 2	S	438	1.72067	A	I	E	D	G	E	E	G	S	E	D	D	A	E	W	V	V	VERGPDEAIEDGEEGSEDDAEWVVTKDKSKY	Q8BH64;Q8R2X0	438;338	Casein kinase I substrate motif;Casein kinase II substrate motif;G protein-coupled receptor kinase 1 substrate motif;Pyruvate dehydrogenase kinase substrate motif	MGPFVERGPDEAIEDGEEGS(1)EDDAEWVVTK	156.69	1	0.936515	0.851279	0.686406	0.657696	0.782974	9.10884	239.02	3	1130.47	0.3012
Ahnak		S	5522	1.71465	G	D	L	K	S	S	K	A	S	L	G	S	L	E	G	E	V	ASISGSKGDLKSSKASLGSLEGEVEAEASSP	E9Q616;Q8VDN3;E9Q1H8;Q6UIL4	5522;890;603;543	Casein kinase I substrate motif;Casein kinase II substrate motif;MAPKAPK2 kinase substrate motif;PKA kinase substrate motif;PKC kinase substrate motif	AS(1)LGS(1)LEGEVEAEAS(0.052)S(0.948)PKGK	207.97	1	0.568324	0.86576	0.878268	0.79932	0.777918	8.90398	302.66	2	1093.44	0.25297
Grlf1	Rho GTPase-activating protein 35	S	1179	1.71281	Y	R	T	S	F	S	V	G	S	D	D	E	L	G	P	I	R	RLGRFASYRTSFSVGSDDELGPIRKKEEDQA	B2RTN5;Q91YM2;Q3TSU7;Q3UVZ8;Q5U612;F7CQQ6	1179;1179;1179;308;94;89	BARD1 BRCT domain binding motif;Casein kinase II substrate motif	TSFSVGS(1)DDELGPIR	205.78	0.999999	0.45038	0.755999	0.986159	0.912918	0.776364	7.73048	237.46	2	830.367	0.6281
Serbp1	Plasminogen activator inhibitor 1 RNA-binding protein	S	306	1.71002	K	K	G	F	V	L	H	K	S	K	S	E	E	A	H	A	E	EGADGQWKKGFVLHKSKSEEAHAEDSVMDHH	Q3UEI6;Q3UJK2;Q9CY58;Q3UMP4	306;312;327;321	Casein kinase II substrate motif	S(0.838)KS(0.154)EEAHAEDS(0.008)VMDHHFR	39.685	0.837748	0.43808	1.79851	0.389508	0.469949	0.774011	7.86088	77.959	5	439.183	-0.17272
Traf3ip1	TRAF3-interacting protein 1	S	409	1.70573	P	P	R	V	K	R	Q	E	S	T	E	T	L	V	V	D	R	PGSARPAPPRVKRQESTETLVVDRSGSGKTV	Q149C2	409	14-3-3 domain binding motif;AMP-activated protein kinase substrate motif;b-Adrenergic Receptor kinase substrate motif;Calmodulin-dependent protein kinase I substrate motif;Calmodulin-dependent protein kinase II substrate motif;Calmodulin-dependent protein kinase IV substrate motif;Casein kinase I substrate motif;Casein kinase II substrate motif;Chk1 kinase substrate motif;PKA kinase substrate mot…	RQES(0.984)T(0.015)ET(0.002)LVVDR	165.16	0.983641	0.500292	NaN	1.62981	0.181068	0.770391	7.43327	165.16	2	756.856	0.02383
Cdk14	Cyclin-dependent kinase 14	S	78	1.70123	K	V	R	V	Q	R	T	Q	S	T	F	D	P	F	E	K	P	DTIPEDKKVRVQRTQSTFDPFEKPANQVKRV	O35495;Q8BFX6;Q8BQ67;E9Q435;Q9D4N7;E9PVC7;Q6NVF8;Q8BN81;Q8C411;E9Q9M2;D6RHB2;D3YV23	78;78;78;78;78;60;32;32;32;108;32;32	14-3-3 domain binding motif;Calmodulin-dependent protein kinase II substrate motif;Calmodulin-dependent protein kinase IV substrate motif;Casein kinase II substrate motif;Chk1 kinase substrate motif;G protein-coupled receptor kinase 1 substrate motif;PKA kinase substrate motif;PKC kinase substrate motif;Pyruvate dehydrogenase kinase substrate motif	T(0.002)QS(0.997)T(0.001)FDPFEKPANQVK	163.45	0.996904	0.681944	NaN	1.09486	0.522924	0.766577	7.65218	229.4	2	958.943	-0.29601
Sqstm1	Sequestosome-1	S	334	1.69923	E	Q	M	E	S	G	N	C	S	G	G	D	D	D	W	T	H	ESVGQPEEQMESGNCSGGDDDWTHLSSKEVD	Q64337	334	Casein kinase II substrate motif;MAPKAPK2 kinase substrate motif;Pyruvate dehydrogenase kinase substrate motif	IALESVGQPEEQMES(0.004)GNCS(0.989)GGDDDWT(0.001)HLS(0.003)S(0.003)K	104.14	0.988559	0.724563	0.88323	0.680336	0.771397	0.764881	8.67919	104.14	3	1148.47	-0.5145
Ppfia1		S	242	1.69635	N	G	K	R	S	S	D	G	S	L	S	H	E	D	L	A	K	QESAPSTNGKRSSDGSLSHEDLAKVLELQEV	B8QI33;B2RXQ2;B2RXW8	242;242;242	Casein kinase II substrate motif;MAPKAPK2 kinase substrate motif	RS(0.021)S(0.977)DGS(0.988)LS(0.014)HEDLAK	92.264	0.987591	0.781821	0.712199	0.829742	0.725971	0.762433	7.93169	99.413	3	554.557	-0.60031
Pkn2	Serine/threonine-protein kinase N2	S	582	1.69366	P	P	A	P	P	R	A	S	S	L	G	E	T	D	E	S	S	FDLEPEPPPAPPRASSLGETDESSELRVLDI	Q8BWW9;G3UZM9;G3UXH4;F6TJL1	582;566;534;558	14-3-3 domain binding motif;Calmodulin-dependent protein kinase II substrate motif;Casein kinase II substrate motif;G protein-coupled receptor kinase 1 substrate motif;MDC1 BRCT domain binding motif;Phosphorylase kinase substrate motif;PKA kinase substrate motif;PKC kinase substrate motif;Plk1 PBD domain binding motif	AS(0.091)S(0.909)LGETDESSELR	121.32	0.908653	0.725436	0.711407	0.704089	0.899641	0.760143	7.44235	121.32	2	780.825	0.30821
Ppfia1		S	239	1.68927	P	S	T	N	G	K	R	S	S	D	G	S	L	S	H	E	D	NHEQESAPSTNGKRSSDGSLSHEDLAKVLEL	B8QI33;B2RXQ2;B2RXW8	239;239;239	Casein kinase I substrate motif;Casein kinase II substrate motif;MDC1 BRCT domain binding motif;PAK2 kinase substrate motif;PKA kinase substrate motif;PKC kinase substrate motif;Plk1 PBD domain binding motif	RSS(1)DGS(0.907)LS(0.093)HEDLAK	99.413	0.999648	0.829444	0.712199	0.836089	0.647852	0.756396	8.06043	177	2	831.332	0.30071
Svil	Supervillin	T	407	1.68808	R	R	M	N	A	R	Y	Q	T	Q	P	V	T	L	G	E	V	NRIDVRQRRMNARYQTQPVTLGEVEQVQSGK	E3VVQ8;E9Q983;E9Q3Z5;Q8K4L3;Q8K4L2;E9PVA9	407;407;697;811;811;811	Calmodulin-dependent protein kinase II substrate motif;Casein kinase I substrate motif;G protein-coupled receptor kinase 1 substrate motif;PKC kinase substrate motif	YQT(1)QPVTLGEVEQVQSGK	197.28	1	0.695103	-0.0813543	1.49208	0.915718	0.755386	8.04552	275.2	2	1035.99	0.076527
Baiap2	Brain-specific angiogenesis inhibitor 1-associated protein 2	S	367	1.68736	N	K	T	L	P	R	S	S	S	M	A	A	G	L	E	R	N	NSYATTENKTLPRSSSMAAGLERNGRMRVKA	B1AZ47;Q8BKX1;Q3UKP6;B1AZ46;B1AZ43;B1AZ45	367;367;367;367;367;327	14-3-3 domain binding motif;Calmodulin-dependent protein kinase II alpha substrate motif;Calmodulin-dependent protein kinase II substrate motif;Calmodulin-dependent protein kinase IV substrate motif;Chk1 kinase substrate motif;MDC1 BRCT domain binding motif;PKA kinase substrate motif;PKC kinase substrate motif;Plk1 PBD domain binding motif	SS(0.002)S(0.998)MAAGLER	99.531	0.997843	0.655993	0.76757	0.660703	0.934814	0.75477	8.06262	141.58	2	552.723	-0.089938
Pdcd4	Programmed cell death protein 4	S	94	1.68523	R	S	G	V	A	V	P	T	S	P	K	G	R	L	L	D	R	DNGSEAVRSGVAVPTSPKGRLLDRRSRSGKG	Q61823	94	ERK1,2 kinase substrate motif;Growth associated histone HI kinase substrate motif;GSK-3, ERK1, ERK2, CDK5 substrate motif;PKA kinase substrate motif;PKC kinase substrate motif;WW domain binding motif	S(0.005)GVAVPT(0.028)S(0.967)PK	34.179	0.967152	0.882839	4.15348	-1.4163	-0.608242	0.752945	8.2381	118.51	2	511.75	-0.21961
Ctnnd1	Catenin delta-1	S	268	1.67039	Q	P	Q	V	R	V	G	G	S	S	V	D	L	H	R	F	H	RQDVYGPQPQVRVGGSSVDLHRFHPEPYGLE	E9Q8Z8;E9Q8Z6;E9Q8Z5;P30999;G3X9V2;E9Q904;E9Q901;E9Q903;D3Z2H2;E9Q8Z9;E9Q8Z4;E9Q905;E9Q907;E9Q906;D3Z7H6;E9Q986;Q3TPD1;Q3UF77	268;268;268;268;268;214;214;214;214;214;204;167;167;167;167;167;268;4	AMP-activated protein kinase substrate motif;Casein kinase II substrate motif;Pyruvate dehydrogenase kinase substrate motif	VGGS(1)SVDLHR	186.17	0.999574	0.752235	-0.41348	1.2952	1.32677	0.740181	8.21176	186.17	2	553.753	0.34596
Nedd4	E3 ubiquitin-protein ligase;E3 ubiquitin-protein ligase NEDD4	S	309	1.66337	A	F	T	T	R	R	Q	I	S	E	D	V	D	G	P	D	N	MQLQAQRAFTTRRQISEDVDGPDNRESPENW	B2RSC8;P46935;Q3TUU1	309;309;309	14-3-3 domain binding motif;Calmodulin-dependent protein kinase II substrate motif;G protein-coupled receptor kinase 1 substrate motif;PKA kinase substrate motif;PKC kinase substrate motif;ZIP kinase substrate motif	RQIS(1)EDVDGPDNR	136.26	1	0.419755	0.823097	0.769502	0.924098	0.734113	7.29201	136.26	2	790.839	-0.74347
Tjp2	Tight junction protein ZO-2	S	988	1.66239	A	R	S	Q	N	R	E	D	S	F	D	Y	S	K	S	N	L	FKPEPPKARSQNREDSFDYSKSNLPATAGSE	Q9Z0U1	988	14-3-3 domain binding motif;b-Adrenergic Receptor kinase substrate motif;Calmodulin-dependent protein kinase II substrate motif;Casein kinase II substrate motif;G protein-coupled receptor kinase 1 substrate motif;GSK3 kinase substrate motif;PKA kinase substrate motif;PKC epsilon kinase substrate motif;PKC kinase substrate motif	SQNREDS(1)FDYSK	121.82	0.999841	0.966726	0.796764	0.834519	0.335026	0.733259	7.50326	124.2	2	778.307	-0.70099
Clasp1	CLIP-associating protein 1	S	633	1.66112	S	A	A	A	L	P	P	G	S	Y	A	S	L	G	R	I	R	SGSPAFSSAAALPPGSYASLGRIRTRRQSSG	E9QKH0;B2RY22;Q80TV8;E9QNY9;A5D6Q8	633;633;633;633;633	Casein kinase I substrate motif;Casein kinase II substrate motif	VSSSSGSPAFSSAAALPPGS(0.975)Y(0.012)AS(0.013)LGR	74.444	0.974917	NaN	0.525868	0.676734	0.993867	0.732156	7.59063	89.663	3	831.055	-1.0324
Kiaa1468	LisH domain and HEAT repeat-containing protein KIAA1468	S	180	1.65655	G	G	Q	L	N	R	A	G	S	I	S	T	L	D	S	L	D	EPSTTSGGGQLNRAGSISTLDSLDFARYSDD	Q148V7;G3X9J4;E9QM90	180;180;180	14-3-3 domain binding motif;Calmodulin-dependent protein kinase I substrate motif;Calmodulin-dependent protein kinase II alpha substrate motif;Calmodulin-dependent protein kinase II substrate motif;Calmodulin-dependent protein kinase IV substrate motif;Casein kinase I substrate motif;Casein kinase II substrate motif;Chk1 kinase substrate motif;Phosphorylase kinase substrate motif;PKA kinase subst…	AGS(0.994)IS(0.006)TLDSLDFAR	136.63	0.993993	0.761881	0.599699	NaN	0.822962	0.728181	7.1329	169.02	2	766.853	-0.55009
Cit	Citron Rho-interacting kinase	S	2029	1.65547	R	T	E	L	R	R	D	K	S	P	G	R	P	L	E	R	E	RYRDREGRTELRRDKSPGRPLEREKSPGRML	E9QPY8;D3YU89;E9QL53;P49025;D3Z1U0;E9QPZ0;F6SBR5	2029;2014;1999;1999;1972;1957;1586	14-3-3 domain binding motif;Calmodulin-dependent protein kinase II substrate motif;Calmodulin-dependent protein kinase IV substrate motif;Cdc2 kinase substrate motif;CDK kinase substrate motif;CDK1,2,4,6 kinase substrate motif;Chk1 kinase substrate motif;CLK1 kinase substrate motif;ERK1,2 kinase substrate motif;G protein-coupled receptor kinase 1 substrate motif;Growth associated histone HI kinas…	DKS(1)PGRPLER	92.19	1	NaN	0.513086	1.06425	0.604389	0.727243	7.12811	92.19	2	617.801	0.81675
Mtap1b	Microtubule-associated protein 1B;MAP1 light chain LC1	Y	1405	1.65515	P	L	L	G	S	E	S	P	Y	E	D	F	L	S	A	D	S	LSPLRSPPLLGSESPYEDFLSADSKVLGRRS	B2RQQ5;P14873	1405;1405	ALK kinase substrate motif;Src kinase substrate motif	VLS(0.061)PLRS(0.93)PPLLGS(0.011)ES(0.073)PY(0.914)EDFLS(0.01)ADS(0.001)K	100.04	0.914188	1.5592	0.614851	0.00682564	NaN	0.726958	7.48926	135.64	3	988.794	0.71438
Eif4b	Eukaryotic translation initiation factor 4B	T	500	1.64029	P	A	R	S	Q	S	S	D	T	E	Q	P	S	P	T	S	G	VKRSSNPPARSQSSDTEQPSPTSGGGKVAAV	Q3TSY9;Q3UGC0;Q8BGD9;Q3TLQ9;Q3TDD8;Q922K6	500;500;500;500;500;252	b-Adrenergic Receptor kinase substrate motif;G protein-coupled receptor kinase 1 substrate motif	S(0.012)QS(0.328)S(0.328)DT(0.328)EQPS(0.004)PTSGGGK	70.197	0.328019	-2.17202	-1.73889	NaN	6.05275	0.713947	7.0735	70.197	2	865.349	0.0035292
Nfix	Nuclear factor 1;Nuclear factor 1;Nuclear factor 1;Nuclear factor 1;Nuclear factor 1 X-type	S	285	1.63546	T	S	S	T	K	R	P	K	S	I	D	D	S	E	M	E	S	SITSPPSTSSTKRPKSIDDSEMESPVDDVFY	F6VBN9;Q5CZY4;E9PUH7;D3YZ00;P70257	285;285;272;280;280	14-3-3 domain binding motif;Calmodulin-dependent protein kinase II substrate motif;Casein kinase II substrate motif;G protein-coupled receptor kinase 1 substrate motif;GSK3 kinase substrate motif;Phosphorylase kinase substrate motif;PKA kinase substrate motif;PKC kinase substrate motif;Pyruvate dehydrogenase kinase substrate motif	S(0.984)IDDS(0.016)EMESPVDDVFYPGTGR	88.329	0.984156	0.617863	0.820649	0.850324	0.549937	0.709693	7.66467	153.83	2	1198.49	0.29349
Nfix	Nuclear factor 1	S	271	1.63546	S	T	S	T	K	R	P	K	S	I	D	D	S	E	M	E	S	RSITSPPSTSTKRPKSIDDSEMESPVDDVFY	Q3TYK3	271	14-3-3 domain binding motif;Calmodulin-dependent protein kinase II substrate motif;Casein kinase II substrate motif;G protein-coupled receptor kinase 1 substrate motif;GSK3 kinase substrate motif;Phosphorylase kinase substrate motif;PKA kinase substrate motif;PKC kinase substrate motif;Pyruvate dehydrogenase kinase substrate motif	S(0.984)IDDS(0.016)EMESPVDDVFYPGTGR	88.329	0.984156	0.617863	0.820649	0.850324	0.549937	0.709693	7.66467	153.83	2	1198.49	0.29349
Epb4.1l3		S	451	1.6341	S	K	R	Y	T	M	S	R	S	L	D	G	E	V	G	T	G	PYFERSSSKRYTMSRSLDGEVGTGQYATTKG	F8WH44;D0VYV6;E9QN88	451;451;451		S(1)LDGEVGTGQYATTK	161.95	1	NaN	0.798341	0.585107	0.742048	0.708499	7.43214	219.23	2	803.853	-0.57234
Cdc42ep1	Cdc42 effector protein 1	S	368	1.62549	G	V	L	P	Q	V	H	G	S	W	E	S	L	N	E	D	W	DARRELAGVLPQVHGSWESLNEDWSTPPASV	Q91W92	368	Casein kinase I substrate motif;Casein kinase II substrate motif	ELAGVLPQVHGS(0.983)WES(0.017)LNEDWSTPPASVR	74.123	0.982766	NaN	1.03203	0.404172	0.666416	0.700873	7.39578	90.062	3	1047.83	-0.74041
Srrt	Serrate RNA effector molecule homolog	T	543	1.62285	Q	L	W	A	S	E	P	G	T	P	P	V	P	T	S	L	P	HTLDDRTQLWASEPGTPPVPTSLPSQNPILK	Q99MR6	543	Casein kinase I substrate motif;ERK1,2 kinase substrate motif;G protein-coupled receptor kinase 1 substrate motif;GSK3, Erk1, Erk2 and CDK5 kinase motif;GSK-3, ERK1, ERK2, CDK5 substrate motif;MAPKAPK2 kinase substrate motif;WW domain binding motif	TQLWASEPGT(1)PPVPTSLPSQNPILK	107.94	0.999941	0.668119	0.676719	0.802361	0.646903	0.698525	8.30477	128.38	2	1369.69	0.1165
Srrm2	Serine/arginine repetitive matrix protein 2	S	1984	1.62145	P	A	I	R	R	R	S	R	S	R	T	P	L	L	P	R	K	RSRSRTPPAIRRRSRSRTPLLPRKRSRSRSP	Q8BTI8	1984	14-3-3 domain binding motif;Akt kinase substrate motif;Calmodulin-dependent protein kinase II substrate motif;Casein kinase II substrate motif;MAPKAPK1 kinase substrate motif;PKA kinase substrate motif;PKC kinase substrate motif;ZIP kinase substrate motif	S(1)RT(1)PLLPR	105.2	1	-0.0337615	2.26198	0.264339	0.296563	0.697281	8.40362	111.94	2	550.257	0.22992
Srrm2	Serine/arginine repetitive matrix protein 2	T	1986	1.62145	I	R	R	R	S	R	S	R	T	P	L	L	P	R	K	R	S	RSRTPPAIRRRSRSRTPLLPRKRSRSRSPLA	Q8BTI8	1986	Akt kinase substrate motif;Calmodulin-dependent protein kinase II substrate motif;G protein-coupled receptor kinase 1 substrate motif;Growth associated histone HI kinase substrate motif;GSK-3, ERK1, ERK2, CDK5 substrate motif;MAPKAPK2 kinase substrate motif;PKC kinase substrate motif;WW domain binding motif	S(1)RT(1)PLLPR	105.2	1	-0.0337615	2.26198	0.264339	0.296563	0.697281	8.40362	111.94	2	550.257	0.22992
Nrd1	Nardilysin	S	85	1.61681	L	A	R	L	G	A	D	E	S	E	E	E	G	R	S	F	S	DLGESGRLARLGADESEEEGRSFSNVGDPEI	A2A9Q2;A2A9Q1;Q8BHG1;A6PWC3;Q8R320	85;85;85;85;85	b-Adrenergic Receptor kinase substrate motif;BARD1 BRCT domain binding motif;Casein kinase II substrate motif;G protein-coupled receptor kinase 1 substrate motif	LGADES(1)EEEGR	163.99	1	0.594549	0.854075	0.70416	0.619803	0.693147	7.93078	163.99	2	636.243	0.27765
Zfp36l2	Zinc finger protein 36, C3H1 type-like 1	S	564	1.60801	R	L	P	I	F	S	R	L	S	I	S	D	D	_	_	_	_	PSLDPGRRLPIFSRLSISDD___________;PTLDNSRRLPIFSRLSISDD___________	Q3TU59;B9EIF6;Q3TCE3;P23950;Q543H2;Q91YI7	564;480;480;334;334;334	Casein kinase II substrate motif;Casein kinase II substrate motif;PKA kinase substrate motif;PKA kinase substrate motif;PKC kinase substrate motif;PKC kinase substrate motif;Pyruvate dehydrogenase kinase substrate motif;Pyruvate dehydrogenase kinase substrate motif	LPIFSRLS(1)ISDD	136.63	0.999771	0.530271	0.213876	0.899937	1.09702	0.685277	8.03298	136.63	2	721.85	0.78457
Trim28	Transcription intermediary factor 1-beta	S	471	1.60748	P	H	V	S	G	M	K	R	S	R	S	G	E	G	E	V	S	DPYSSAEPHVSGMKRSRSGEGEVSGLLRKVP	Q5EBP9;Q62318;Q3UDN8	471;471;268	Casein kinase II substrate motif;PKA kinase substrate motif;PKC kinase substrate motif	S(0.9)RS(0.1)GEGEVSGLLR	91.62	0.900188	NaN	0.848157	0.546856	0.659381	0.684798	7.53074	101.39	3	476.228	0.23863
Ddx21	Nucleolar RNA helicase 2	S	155	1.60248	L	K	N	G	L	S	Q	P	S	E	E	E	A	D	I	P	K	AGEKSPKLKNGLSQPSEEEADIPKPKKMKKG	Q3ULC7;Q6PCP0;Q9JIK5	155;155;155	BARD1 BRCT domain binding motif;Casein kinase II substrate motif;DNA dependent Protein kinase substrate motif;G protein-coupled receptor kinase 1 substrate motif	NGLSQPS(1)EEEADIPKPK	123.29	1	0.642193	0.750263	0.796335	0.532449	0.68031	7.62427	123.29	3	640.298	0.096294
Serbp1	Plasminogen activator inhibitor 1 RNA-binding protein	S	308	1.6011	G	F	V	L	H	K	S	K	S	E	E	A	H	A	E	D	S	ADGQWKKGFVLHKSKSEEAHAEDSVMDHHFR	Q3UEI6;Q3UJK2;Q9CY58;Q3UMP4	308;314;329;323	Calmodulin-dependent protein kinase II substrate motif;Casein kinase II substrate motif;Chk1 kinase substrate motif;G protein-coupled receptor kinase 1 substrate motif;PKA kinase substrate motif;PKC kinase substrate motif	S(0.034)KS(0.966)EEAHAEDSVMDHHFR	78.324	0.966396	0.442652	1.71936	0.154121	0.400111	0.67906	8.53453	81.448	3	736.632	-0.03815
Ppfibp1	Liprin-beta-1	S	403	1.60093	K	L	P	T	K	P	E	T	S	F	E	E	G	D	G	R	A	VETCEKPKLPTKPETSFEEGDGRAILGAAAE	Q3U417;Q8C8U0;B2KFS3;Q3UJ84;F6S1C4;B2KFS2	403;403;35;403;96;35	Casein kinase II substrate motif;PKA kinase substrate motif	LPT(0.001)KPET(0.185)S(0.814)FEEGDGR	77.221	0.813866	NaN	0.873971	0.59342	0.569351	0.678914	7.44188	77.221	3	581.593	-0.11281
Reps1	RalBP1-associated Eps domain-containing protein 1	S	561	1.59637	Q	P	S	H	S	R	S	S	S	L	D	M	N	R	T	F	A	PPPPPRPQPSHSRSSSLDMNRTFAVTTGQQQ	O54916;E9Q632;F6R6F1	561;534;521	14-3-3 domain binding motif;Calmodulin-dependent protein kinase II substrate motif;MAPKAPK2 kinase substrate motif;MDC1 BRCT domain binding motif;Phosphorylase kinase substrate motif;PKA kinase substrate motif;PKC kinase substrate motif;Plk1 PBD domain binding motif	SSS(1)LDMNR	94.309	0.999901	0.740971	0.354001	0.929418	NaN	0.674797	7.1447	108.47	2	495.192	-0.18337
Sh3kbp1		S	183	1.59491	L	R	E	T	T	G	S	E	S	D	G	G	D	S	S	S	T	EQLSKSSLRETTGSESDGGDSSSTKSEGANG	Q3TA88;B1AVE8;E9Q0C1;B1AZ85	183;146;146;124	b-Adrenergic Receptor kinase substrate motif	SSLRETTGS(0.001)ES(0.999)DGGDSSSTK	137.32	0.998616	0.914029	NaN	0.625022	0.481384	0.673478	7.07225	232.69	2	1034.42	0.52135
Fn1	Fibronectin;Anastellin	S	1918	1.58807	D	V	Q	A	D	R	D	D	S	R	E	_	_	_	_	_	_	IECFMPLDVQADRDDSRE_____________	Q3UHR1;G5E8B8;P11276;G5E8M2;Q3UGY5;Q3UHL6;G3X9J7;Q3TCF1;B9EHT6;Q3UH17;B7ZNJ1;Q3UZF9;Q8R3F3;Q99KD0	1918;2475;2475;2384;2384;2359;2294;2294;2269;2264;2174;1053;808;214	14-3-3 domain binding motif;b-Adrenergic Receptor kinase substrate motif;Calmodulin-dependent protein kinase II substrate motif;Casein kinase II substrate motif;PKA kinase substrate motif;PKC kinase substrate motif	TNTNVNCPIECFMPLDVQADRDDS(1)RE	159.67	1	1.16376	1.13599	0.271165	0.0981966	0.667278	8.56975	162.32	3	1059.44	-0.085296
Srrm2	Serine/arginine repetitive matrix protein 2	S	1628	1.58731	K	S	R	T	A	R	R	G	S	R	S	S	I	E	P	K	T	SSPEHAPKSRTARRGSRSSIEPKTKSHTPPR	Q8BTI8	1628	14-3-3 domain binding motif;Calmodulin-dependent protein kinase II substrate motif;Casein kinase I substrate motif;Casein kinase II substrate motif;PAK2 kinase substrate motif;PKA kinase substrate motif;PKC epsilon kinase substrate motif;PKC kinase substrate motif	RGS(0.997)RS(0.562)S(0.441)IEPK	105.99	0.996831	0.734048	0.585636	NaN	0.680058	0.666581	8.41061	105.99	2	638.776	0.14008
Luzp1	Leucine zipper protein 1	S	703	1.58713	S	S	G	R	E	K	P	D	S	D	D	D	L	D	I	E	S	LRCRVIKSSGREKPDSDDDLDIESFVTAKLV	B7ZW89;B2RQ68;Q8R4U7;Q6KAP6	703;660;660;298	b-Adrenergic Receptor kinase substrate motif;Casein kinase II substrate motif;PKA kinase substrate motif;PKC kinase substrate motif;Pyruvate dehydrogenase kinase substrate motif	EKPDS(1)DDDLDIESFVTAK	115.5	1	0.658097	0.718351	0.727403	0.561814	0.666416	8.36018	186.97	3	701.972	-0.069108
Eif3b	Eukaryotic translation initiation factor 3 subunit B	S	143	1.58224	G	E	A	D	E	P	S	F	S	D	P	E	D	F	V	D	D	EPRALENGEADEPSFSDPEDFVDDVSEEELL	Q8CIJ3;E9PX78;Q8JZQ9	143;143;143	Casein kinase II substrate motif	ALENGEADEPS(1)FS(1)DPEDFVDDVS(1)EEELLGDVLK	96.598	1	0.238665	0.961623	NaN	0.785627	0.661971	8.21917	163.09	3	1283.84	-0.10268
Eif3b	Eukaryotic translation initiation factor 3 subunit B	S	153	1.58224	P	E	D	F	V	D	D	V	S	E	E	E	L	L	G	D	V	DEPSFSDPEDFVDDVSEEELLGDVLKDRPQE	Q8CIJ3;E9PX78;Q8JZQ9	153;153;153	BARD1 BRCT domain binding motif;Casein kinase I substrate motif;Casein kinase II substrate motif;G protein-coupled receptor kinase 1 substrate motif	ALENGEADEPS(1)FS(1)DPEDFVDDVS(1)EEELLGDVLK	96.598	1	0.238665	0.961623	NaN	0.785627	0.661971	8.1422	163.09	3	1283.84	-0.10268
Cdk14	Cyclin-dependent kinase 14	S	134	1.57922	S	P	K	F	G	K	A	D	S	Y	E	K	L	E	K	L	G	SSPSSPTSPKFGKADSYEKLEKLGEGSYATV	O35495;Q8BFX6;Q8BQ67;E9Q435;Q9D4N7;E9PVC7;Q6NVF8;Q8BN81;Q8C411	134;134;134;134;134;116;88;88;88	b-Adrenergic Receptor kinase substrate motif;Calmodulin-dependent protein kinase II substrate motif;Casein kinase II substrate motif;PKA kinase substrate motif;PKC kinase substrate motif	ADS(1)YEKLEK	98.902	0.99999	0.818605	0.427606	0.731422	NaN	0.659211	7.84449	126.83	2	581.755	0.20447
Grlf1	Rho GTPase-activating protein 35	S	1176	1.57219	F	A	S	Y	R	T	S	F	S	V	G	S	D	D	E	L	G	RCTRLGRFASYRTSFSVGSDDELGPIRKKEE	B2RTN5;Q91YM2;Q3TSU7;Q3UVZ8;Q5U612;F7CQQ6	1176;1176;1176;305;91;86	Casein kinase I substrate motif;Casein kinase II substrate motif	T(0.056)S(0.056)FS(0.508)VGS(0.38)DDELGPIR	108.59	0.507887	0.45038	0.597507	0.910448	NaN	0.652778	7.31488	108.59	2	830.367	-0.41671
Chmp2b	Charged multivesicular body protein 2b	S	199	1.56992	A	S	T	S	K	A	T	I	S	D	E	E	I	E	R	Q	L	AARSLPSASTSKATISDEEIERQLKALGVD_	Q8BJF9	199	BARD1 BRCT domain binding motif;Casein kinase II substrate motif;PKA kinase substrate motif	ATIS(1)DEEIER	141.37	0.999965	0.853277	0.664119	0.589898	0.495471	0.650691	8.0493	149.69	2	621.766	0.0024562
Spink5		T	122	1.56842	S	D	T	S	S	V	C	G	T	D	G	K	T	Y	R	S	R	DGDFICPSDTSSVCGTDGKTYRSRCELCAEN	Q148R4;Q5K5D4;Q8BM23;Q8BM18;Q3TRK5	122;122;122;122;122	G protein-coupled receptor kinase 1 substrate motif;MAPKAPK2 kinase substrate motif	KDGDFICPSDTSSVCGT(1)DGK	69.765	0.999913	-2.5438	-1.59222	2.63792	4.09535	0.649309	8.14383	69.765	2	1113.44	-0.68021
Ddx21	Nucleolar RNA helicase 2	S	107	1.5674	E	P	L	E	K	Q	A	D	S	E	T	K	E	I	I	T	E	KTSKKKKEPLEKQADSETKEIITEEPSEEEA	Q3ULC7;Q6PCP0;Q9JIK5;Q9CWZ5	107;107;107;88	b-Adrenergic Receptor kinase substrate motif;Casein kinase II substrate motif;G protein-coupled receptor kinase 1 substrate motif;PKA kinase substrate motif	QADS(0.988)ET(0.011)KEIITEEPSEEEADMPKPK	46.847	0.988465	0.603217	0.409581	0.725375	0.855327	0.648375	8.52456	46.847	4	728.576	0.25952
Mprip	Myosin phosphatase Rho-interacting protein	S	538	1.56382	R	E	R	R	R	E	G	R	S	K	T	F	D	W	A	E	F	EQKKSRARERRREGRSKTFDWAEFRPIQQAL	P97434;F6RND9;Q5SWZ6;Q5SWZ5;F6S5I0;E9PZ80;Q8C8T6;Q8CBS0	538;524;524;502;349;61;502;332	Casein kinase I substrate motif;Casein kinase II substrate motif	S(0.966)KT(0.034)FDWAEFRPIQQALAQER	88.283	0.966454	0.71984	NaN	0.783117	0.432279	0.645079	7.40334	99.11	4	626.055	0.19204
Fnbp1	Formin-binding protein 1	S	296	1.56109	T	Q	P	M	K	R	T	V	S	D	N	S	L	S	S	S	K	DIEFEDYTQPMKRTVSDNSLSSSKEGKPELR	Q80TY0;A2AQ41;D3YYV4;A2AQ45;A2AQ42;A2AQ44;A2AQ43	296;296;295;296;296;296;296	14-3-3 domain binding motif;AMP-activated protein kinase substrate motif;Calmodulin-dependent protein kinase I substrate motif;Calmodulin-dependent protein kinase II substrate motif;Calmodulin-dependent protein kinase IV substrate motif;Casein kinase I substrate motif;Casein kinase II substrate motif;Chk1 kinase substrate motif;PKA kinase substrate motif;PKC kinase substrate motif	TVS(1)DNSLSSSK	115.91	0.999981	0.0792927	0.174534	NaN	1.67383	0.642553	7.16578	115.91	2	602.758	0.060949
Pi4kb	Phosphatidylinositol 4-kinase beta	S	440	1.55099	E	N	R	I	R	S	T	R	S	V	E	N	L	P	E	C	G	SVPARIPENRIRSTRSVENLPECGITHEQRA	E9Q8A3;Q8BKC8;D6RI80	440;428;96	AMP-activated protein kinase substrate motif;Casein kinase II substrate motif	S(1)VENLPECGITHEQR	114.55	1	0.592445	0.635894	0.571665	0.73274	0.633186	7.624	114.55	2	924.901	-0.071045
Eif4g1	Eukaryotic translation initiation factor 4 gamma 1	S	1211	1.54883	P	E	G	L	R	K	A	A	S	L	T	E	D	R	G	R	D	SRERPSQPEGLRKAASLTEDRGRDPVKREAT	Q6NZJ6;E9PVC5;E9Q9E1;E9PVC6;E9Q298;Q6PD42;Q8K0J8;Q8R2V4	1211;1205;1204;1164;441;434;253;90	Calmodulin-dependent protein kinase II substrate motif;Casein kinase II substrate motif;Chk1 kinase substrate motif;Phosphorylase kinase substrate motif;PKA kinase substrate motif;PKC kinase substrate motif	AAS(0.999)LT(0.001)EDR	96.113	0.999463	1.2233	0.662844	NaN	0.00740562	0.631183	7.30997	96.113	2	471.7	-0.038079
Bms1		T	806	1.54678	H	K	G	K	P	G	P	D	T	Q	S	E	D	I	E	E	E	DLETGDVHKGKPGPDTQSEDIEEEEVKEETD	Q6ZQH0;Q6PGF5;Q3V0N4;Q8K0N8;Q3UYW7	806;803;803;457;803	b-Adrenergic Receptor kinase substrate motif;Casein kinase II substrate motif	GKPGPDT(0.798)QS(0.201)EDIEEEEVKEET(0.002)DPSEEESAR	52.347	0.797628	0.561888	0.492109	0.296403	1.16666	0.629266	7.65645	73.865	3	1142.81	-0.045783
Ube4b	Ubiquitin conjugation factor E4 B	S	101	1.53716	E	G	V	S	S	L	S	S	S	P	S	N	S	L	E	T	Q	AHRSQSSEGVSSLSSSPSNSLETQSQSLSRS	Q80TU3;E9Q664;B2KFK2;Q6NWW1;Q9ES00;G3UZD6;B2KFK1;Q3V426;G3UZM6	101;88;88;88;88;88;88;88;88	Casein kinase I substrate motif;Casein kinase II substrate motif;ERK1,2 kinase substrate motif;G protein-coupled receptor kinase 1 substrate motif;GSK3 kinase substrate motif;GSK-3, ERK1, ERK2, CDK5 substrate motif;MAPKAPK2 kinase substrate motif;MDC1 BRCT domain binding motif;Plk1 PBD domain binding motif;WW domain binding motif	SQSSEGVS(0.041)S(0.047)LS(0.041)S(0.041)S(0.821)PS(0.008)NS(0.002)LETQSQSLSR	86.131	0.820583	0.498149	0.341417	0.777962	0.863546	0.620268	7.64453	117.61	3	946.088	0.032371
Ccnyl1		S	352	1.53346	R	A	A	M	R	R	S	L	S	A	D	N	F	I	G	I	Q	DKYKDLCRAAMRRSLSADNFIGIQRSNAILS	D3YUJ3;E9Q226	352;276	14-3-3 domain binding motif;AMP-activated protein kinase substrate motif;Calmodulin-dependent protein kinase I substrate motif;Calmodulin-dependent protein kinase II substrate motif;Calmodulin-dependent protein kinase IV substrate motif;Chk1 kinase substrate motif;PKA kinase substrate motif;PKC kinase substrate motif;ZIP kinase substrate motif	SLS(1)ADNFIGIQR	201.3	0.999961	0.611267	0.32435	0.874878	0.656672	0.616792	8.11381	205.28	2	700.832	-0.32831
Melk	Maternal embryonic leucine zipper kinase	S	521	1.53104	K	K	G	T	N	V	F	G	S	L	E	R	G	L	D	K	V	HMEDTPKKKGTNVFGSLERGLDKVLTALTRN	Q3TJF3;Q3TU15;Q5U440;Q61846	521;521;521;521	Casein kinase II substrate motif	GTNVFGS(1)LER	108.58	1	0.769264	0.836005	0.382607	0.470189	0.614516	7.69214	108.58	2	580.261	-0.48934
Chmp3	Charged multivesicular body protein 3	S	200	1.52496	E	P	A	G	A	M	A	A	S	E	E	G	E	E	E	E	D	TDALPEPEPAGAMAASEEGEEEEDEEDLEAM	Q9CQ10	200	Casein kinase II substrate motif;G protein-coupled receptor kinase 1 substrate motif	VTDALPEPEPAGAMAAS(1)EEGEEEEDEEDLEAMQSR	114.79	1	0.550507	1.03808	0.241731	0.604762	0.608771	7.73469	135.57	3	1281.19	-0.3841
Bmp2k	BMP-2-inducible protein kinase	S	908	1.52434	R	P	L	P	A	R	P	R	S	V	D	I	F	G	S	T	P	PAVGPDARPLPARPRSVDIFGSTPFQPFSVS	Q91Z96	908	14-3-3 domain binding motif;Calmodulin-dependent protein kinase II substrate motif;Phosphorylase kinase substrate motif;PKA kinase substrate motif;PKC kinase substrate motif	S(1)VDIFGSTPFQPFSVSASK	164.18	1	0.930548	1.03005	0.938487	-0.46634	0.608187	7.31269	195.03	2	1040.98	-0.52781
Map4	Microtubule-associated protein 4;Microtubule-associated protein	S	506	1.51982	E	F	N	N	V	T	P	L	S	E	E	E	V	T	S	V	K	LPETKVAEFNNVTPLSEEEVTSVKDMSPSAE	P27546;E9QPW8	506;506	BARD1 BRCT domain binding motif;Casein kinase II substrate motif;G protein-coupled receptor kinase 1 substrate motif	VAEFNNVTPLS(1)EEEVTSVK	188.07	0.999983	0.602742	0.818114	0.452965	0.541765	0.603896	7.43205	253.36	2	1086.51	0.29251
Srrm2	Serine/arginine repetitive matrix protein 2	S	1305	1.51649	V	S	E	V	N	T	G	F	S	P	E	V	K	E	E	L	N	EFKNSGPVSEVNTGFSPEVKEELNGSFLNQT	Q8BTI8	1305	Casein kinase II substrate motif;ERK1,2 kinase substrate motif;GSK-3, ERK1, ERK2, CDK5 substrate motif;WW domain binding motif	NSGPVSEVNTGFS(1)PEVK	185.71	0.999994	NaN	1.12208	0.463012	0.217122	0.600737	7.51151	210.29	2	914.412	-0.23793
Eif5b	Eukaryotic translation initiation factor 5B	S	114	1.51158	K	T	S	F	D	E	N	D	S	E	E	L	E	D	K	D	S	KKGQKGKKTSFDENDSEELEDKDSKSKKTAR	Q05D44	114	b-Adrenergic Receptor kinase substrate motif;Casein kinase I substrate motif;Casein kinase II substrate motif;G protein-coupled receptor kinase 1 substrate motif	TSFDENDS(1)EELEDKDSK	248.46	1	0.688225	0.720191	0.463211	0.512596	0.596056	8.99334	284.98	2	1034.4	-0.097777
Trim28	Transcription intermediary factor 1-beta	S	473	1.50685	V	S	G	M	K	R	S	R	S	G	E	G	E	V	S	G	L	YSSAEPHVSGMKRSRSGEGEVSGLLRKVPRV	Q5EBP9;Q62318;Q3UDN8	473;473;270	14-3-3 domain binding motif;Calmodulin-dependent protein kinase II substrate motif;Calmodulin-dependent protein kinase IV substrate motif;Casein kinase II substrate motif;Chk1 kinase substrate motif;PKA kinase substrate motif;PKC kinase substrate motif;ZIP kinase substrate motif	SRS(1)GEGEVSGLLR	145.69	0.999985	0.325847	0.57056	0.743666	0.726066	0.591535	7.98329	146.88	2	713.838	-0.11821
Nbas		S	2269	1.50345	S	A	V	T	K	V	N	D	S	N	C	D	Q	E	L	L	S	AMALEQISAVTKVNDSNCDQELLSLLVDARL	E9Q411;Q6GQV6;Q80XK8;Q6PGH6;Q3UJX6;Q80X24	2269;1779;1622;1236;817;198	b-Adrenergic Receptor kinase substrate motif;Casein kinase II substrate motif;PKA kinase substrate motif;Pyruvate dehydrogenase kinase substrate motif	VNDS(1)NCDQELLSLLVDAR	120.56	0.999976	0.678523	0.7589	0.327421	NaN	0.588281	7.32064	120.56	2	1070.98	-1.4633
Mgea5	Bifunctional protein NCOAT;Protein O-GlcNAcase;Histone acetyltransferase	S	364	1.5033	Q	I	K	L	E	N	E	G	S	D	E	D	I	E	T	D	V	EDSTVSIQIKLENEGSDEDIETDVLYSPQMA	Q9EQQ9;Q05CX1;Q9CU60	364;364;110	Casein kinase II substrate motif;Pyruvate dehydrogenase kinase substrate motif	LENEGS(1)DEDIETDVLYSPQMALK	125.06	0.999999	0.472384	0.647729	NaN	0.644285	0.588132	7.57397	125.06	2	1338.59	0.29553
Necap2	Adaptin ear-binding coat-associated protein 2	S	181	1.50132	G	T	P	R	A	R	P	T	S	A	G	G	L	S	L	L	P	RKKEGAAGTPRARPTSAGGLSLLPPPPGGKS	A2AA82;Q3TBZ6;Q9D1J1	181;181;181	14-3-3 domain binding motif;Akt kinase substrate motif;Calmodulin-dependent protein kinase II substrate motif;MAPKAPK1 kinase substrate motif;PKA kinase substrate motif;PKC kinase substrate motif	ARPT(0.082)S(0.917)AGGLS(0.001)LLPPPPGGK	114.21	0.917436	NaN	-0.48916	1.41012	0.837738	0.586233	7.09513	114.21	2	926.988	0.12937
Marcks	Myristoylated alanine-rich C-kinase substrate	S	163	1.49967	K	S	F	K	L	S	G	F	S	F	K	K	S	K	K	E	S	KKRFSFKKSFKLSGFSFKKSKKESGEGAEAE	P26645	163	G protein-coupled receptor kinase 1 substrate motif;GSK3 kinase substrate motif;PKA kinase substrate motif;PKC kinase substrate motif	LS(1)GFS(1)FKK	54.343	1	1.06447	-0.431015	1.09237	0.61277	0.584649	9.30001	136.5	2	537.227	-0.02055
Srrm2	Serine/arginine repetitive matrix protein 2	S	1338	1.49905	E	Q	S	R	S	S	R	R	S	S	S	E	L	S	P	E	V	DPSVDMKEQSRSSRRSSSELSPEVVEKVGLF	Q8BTI8	1338	Casein kinase II substrate motif;MAPKAPK2 kinase substrate motif;PKA kinase substrate motif;PKC kinase substrate motif	S(0.026)S(0.028)RRS(0.915)S(0.81)S(0.22)ELS(1)PEVVEK	98.543	0.915483	0.432532	0.537246	0.846298	0.520128	0.584051	8.0484	105.79	3	672.941	-0.19247
Cdk14	Cyclin-dependent kinase 14	S	24	1.49709	M	K	K	L	R	R	T	L	S	E	S	F	S	R	I	A	L	PAEKIGKMKKLRRTLSESFSRIALKKEDTTF	O35495;Q8BFX6;Q8BQ67;E9Q435;Q9D4N7	24;24;24;24;24	14-3-3 domain binding motif;Calmodulin-dependent protein kinase II substrate motif;Calmodulin-dependent protein kinase IV substrate motif;Casein kinase II substrate motif;Chk1 kinase substrate motif;G protein-coupled receptor kinase 1 substrate motif;GSK3 kinase substrate motif;PKA kinase substrate motif;PKC kinase substrate motif;ZIP kinase substrate motif	TLS(1)ESFSR	94.692	0.999905	0.724388	-0.893732	1.41358	1.08439	0.582157	7.29824	121.36	2	503.716	-0.20359
Dennd4c		S	1020	1.49416	L	Q	P	T	P	E	P	Q	S	P	T	E	P	P	A	W	G	SAIVSKHLQPTPEPQSPTEPPAWGSSIVKVP	A2AJX5;A6H8H2;E9Q449;Q3U2K9;F6WXD7;A2AJX6	1020;971;1020;1020;198;197	Casein kinase I substrate motif;Casein kinase II substrate motif;ERK1,2 kinase substrate motif;G protein-coupled receptor kinase 1 substrate motif;GSK-3, ERK1, ERK2, CDK5 substrate motif;WW domain binding motif	HLQPTPEPQS(0.992)PT(0.008)EPPAWGSSIVK	114.9	0.991607	0.211635	0.0180643	2.09511	-0.00748264	0.579332	8.22391	118.54	3	855.079	-0.22803
Ctps	CTP synthase 1	S	562	1.49408	Y	L	Q	K	G	C	R	L	S	P	R	D	T	Y	S	D	R	SVGRLPHYLQKGCRLSPRDTYSDRSGSSSPD	B1AS53;P70698	562;562	Casein kinase I substrate motif;Casein kinase II substrate motif;ERK1,2 kinase substrate motif;G protein-coupled receptor kinase 1 substrate motif;Growth associated histone HI kinase substrate motif;GSK-3, ERK1, ERK2, CDK5 substrate motif;PKA kinase substrate motif;PKC kinase substrate motif;Pyruvate dehydrogenase kinase substrate motif;WW domain binding motif	GCRLS(1)PR	77.662	1	0.218719	0.00690831	2.25092	-0.1595	0.579262	8.58394	109.29	2	463.207	-0.040636
Srrm2	Serine/arginine repetitive matrix protein 2	S	2646	1.49209	S	L	R	D	S	R	S	L	S	Y	S	P	V	E	R	R	Q	SPRKPIDSLRDSRSLSYSPVERRQPSPQPSP	Q8BTI8	2646	14-3-3 domain binding motif;Calmodulin-dependent protein kinase II substrate motif;Casein kinase II substrate motif;MAPKAPK2 kinase substrate motif;PKA kinase substrate motif;PKC kinase substrate motif	SLS(1)YS(1)PVER	131.13	0.999958	0.48419	-0.00183338	0.963447	0.86352	0.577331	8.32052	131.13	2	599.233	0.061307
Tfip11	Tuftelin-interacting protein 11;Tuftelin-interacting protein 11;Tuftelin-interacting protein 11	S	99	1.49086	A	E	E	A	D	S	E	D	S	D	A	E	E	K	P	V	K	AGLKKGAAEEADSEDSDAEEKPVKQEDFPKD	Q3TTV6;Q9ERA6;Q3UGE9;Q3TPF9	99;99;99;99	b-Adrenergic Receptor kinase substrate motif;Casein kinase II substrate motif	GAAEEADS(1)EDS(1)DAEEKPVKQEDFPK	106.42	1	-0.0360672	1.68921	0.260083	0.391361	0.576147	8.39009	139.11	3	961.049	0.50045
Ddx21	Nucleolar RNA helicase 2	S	118	1.48614	K	E	I	I	T	E	E	P	S	E	E	E	A	D	M	P	K	KQADSETKEIITEEPSEEEADMPKPKKMKKG	Q3ULC7;Q6PCP0;Q9JIK5;Q9CWZ5	118;118;118;99	BARD1 BRCT domain binding motif;Casein kinase I substrate motif;Casein kinase II substrate motif;DNA dependent Protein kinase substrate motif;G protein-coupled receptor kinase 1 substrate motif	QADSETKEIITEEPS(1)EEEADMPKPK	117.38	1	0.472488	0.472696	0.66326	0.677818	0.571565	9.37676	242.16	3	976.43	0.20135
Marcks	Myristoylated alanine-rich C-kinase substrate	S	138	1.48484	K	A	E	D	G	A	A	P	S	P	S	S	E	T	P	K	K	ASSTSSPKAEDGAAPSPSSETPKKKKKRFSF	P26645;Q05BL6	138;138	Casein kinase I substrate motif;Casein kinase II substrate motif;DNA dependent Protein kinase substrate motif;ERK1,2 kinase substrate motif;GSK-3, ERK1, ERK2, CDK5 substrate motif;WW domain binding motif	AEDGAAPS(0.956)PS(0.034)S(0.01)ETPK	140.46	0.956005	0.915636	0.377402	0.842646	0.145557	0.57031	8.2242	179.1	2	762.317	0.02069
Ahnak		T	5590	1.48456	K	H	G	K	L	K	F	G	T	F	G	G	L	G	S	K	S	AGGDAKGKHGKLKFGTFGGLGSKSKGHYEVT	E9Q616;Q8VDN3;E9Q1H8;Q6UIL4;Q8CGE7	5590;958;671;611;599	AMP-activated protein kinase substrate motif;PKA kinase substrate motif;PKC kinase substrate motif	FGT(1)FGGLGSK	128.31	1	-0.19413	-0.305913	1.33537	1.44481	0.570035	7.97728	128.31	2	525.736	-0.17524
Epb4.1l3		S	428	1.48074	T	Q	A	Q	T	R	R	A	S	A	L	I	D	R	P	A	P	KFRYSGRTQAQTRRASALIDRPAPYFERSSS	A7YY80;D0VYV7;E9PV52;Q8BGK4;F8WH44;D0VYV6;E9QN88	428;428;428;428;428;428;428	14-3-3 domain binding motif;Calmodulin-dependent protein kinase II substrate motif;PAK2 kinase substrate motif;PKA kinase substrate motif;PKC epsilon kinase substrate motif;PKC kinase substrate motif	RAS(1)ALIDRPAPYFER	87.088	1	0.679334	-0.0624447	1.05562	0.592745	0.566314	8.38281	91.401	3	614.64	0.45249
Srrm2	Serine/arginine repetitive matrix protein 2	S	1631	1.47957	T	A	R	R	G	S	R	S	S	I	E	P	K	T	K	S	H	EHAPKSRTARRGSRSSIEPKTKSHTPPRRRS	Q8BTI8	1631	Casein kinase II substrate motif;MDC1 BRCT domain binding motif;PKA kinase substrate motif;PKC kinase substrate motif;Plk1 PBD domain binding motif	RGS(0.166)RS(0.838)S(0.995)IEPK	51.445	0.995298	0.594549	0.516822	NaN	0.584176	0.565182	7.98805	103.79	3	426.186	0.60558
Srrm2	Serine/arginine repetitive matrix protein 2	S	1630	1.4733	R	T	A	R	R	G	S	R	S	S	I	E	P	K	T	K	S	PEHAPKSRTARRGSRSSIEPKTKSHTPPRRR	Q8BTI8	1630	Casein kinase II substrate motif;G protein-coupled receptor kinase 1 substrate motif	RGS(0.994)RS(0.981)S(0.025)IEPK	92.939	0.981311	0.315566	0.585636	NaN	0.77596	0.559054	8.37254	105.99	2	638.776	0.27631
Prrx1	Paired mesoderm homeobox protein 1	S	21	1.47198	P	A	L	G	G	R	L	D	S	P	G	N	L	D	T	L	Q	GHVLERQPALGGRLDSPGNLDTLQAKKNFSV	P63013;G3UZ44	21;21	14-3-3 domain binding motif;b-Adrenergic Receptor kinase substrate motif;Calmodulin-dependent protein kinase II substrate motif;ERK1,2 kinase substrate motif;GSK-3, ERK1, ERK2, CDK5 substrate motif;PKA kinase substrate motif;PKC kinase substrate motif;WW domain binding motif	LDS(1)PGNLDTLQAK	97.86	0.999998	NaN	0.026021	0.719899	0.927359	0.55776	6.80892	99.747	2	726.343	0.49279
Nolc1		T	611	1.46976	Q	A	K	K	V	K	L	E	T	P	N	T	F	P	K	R	K	ADEATTPQAKKVKLETPNTFPKRKKGERRAS	Q6ZQK6;E9Q5C9;Q3TKZ9;Q3UI16;Q3U6W2;Q8CE21;E9PVC9;Q3UBB6	611;610;609;609;608;608;608;608	AMP-activated protein kinase substrate motif;b-Adrenergic Receptor kinase substrate motif;Casein kinase I substrate motif;GSK-3, ERK1, ERK2, CDK5 substrate motif;PKA kinase substrate motif;PKC kinase substrate motif;WW domain binding motif	LET(1)PNT(1)FPK	69.352	1	0.709379	0.574634	0.614028	0.324274	0.555579	7.46181	99.844	2	603.746	-0.52847
Larp1b		S	60	1.46677	L	D	G	P	T	E	N	I	S	E	D	E	A	Q	S	S	S	KENREAKLDGPTENISEDEAQSSSQRKRANK	Q8BVS5;Q8R3F0;Q3TQS1	60;60;60	BARD1 BRCT domain binding motif;Casein kinase I substrate motif;Casein kinase II substrate motif;G protein-coupled receptor kinase 1 substrate motif	LDGPTENIS(1)EDEAQSSSQR	167.28	0.999999	-0.855275	0.462157	NaN	2.05104	0.552641	7.71113	167.28	2	1071.94	-1.2453
Ssfa2	Sperm-specific antigen 2 homolog	S	90	1.46571	D	C	R	T	P	L	G	A	S	L	D	E	Q	S	S	G	T	KIAIWLKDCRTPLGASLDEQSSGTPKGVLVR	Q922B9;A2AQD5;A2AQD6;Q3TEM8	90;90;90;90	Casein kinase II substrate motif	TPLGAS(1)LDEQSSGTPK	164.94	0.999999	0.743041	-0.0952809	0.890947	0.667699	0.551601	7.88996	186.15	2	834.38	0.058826
40057	Septin-9	S	30	1.46213	P	T	G	P	A	L	K	R	S	F	E	V	E	E	I	E	P	RLRRLADPTGPALKRSFEVEEIEPPNSTPPR	Q80UG5;A2A6U3	30;12	Casein kinase II substrate motif;PKA kinase substrate motif;PKC kinase substrate motif	RS(1)FEVEEIEPPNSTPPR	70.529	0.999999	0.732226	0.868213	0.4308	0.161056	0.548074	7.61297	70.529	3	688.653	-0.22317
Hdlbp	Vigilin	S	31	1.46032	Q	I	K	V	A	T	L	N	S	E	E	E	N	D	P	P	T	RSGLVPQQIKVATLNSEEENDPPTYKDAFPP	Q3U4Z7;Q3V1M8;Q8VDJ3;Q8BX68	31;31;31;31	BARD1 BRCT domain binding motif;Casein kinase II substrate motif;G protein-coupled receptor kinase 1 substrate motif	VATLNS(1)EEENDPPTYKDAFPPLPEK	129.51	0.999979	0.458697	0.493032	0.582447	0.650975	0.546288	8.28153	219.06	3	961.111	-0.19124
Ahnak		S	5617	1.45884	D	E	A	G	K	L	Q	G	S	G	V	S	L	A	S	K	K	YEVTGSDDEAGKLQGSGVSLASKKSRLSSSS	E9Q616;Q8VDN3;E9Q1H8;Q6UIL4;Q8CGE7	5617;985;698;638;626	Casein kinase I substrate motif;Casein kinase II substrate motif;PKA kinase substrate motif	LQGS(1)GVSLASK	92.8	0.999671	0.602647	0.787349	0.470789	0.318488	0.544818	7.46412	98.676	2	563.779	-0.58149
Ahctf1	Protein ELYS	S	1218	1.45724	T	P	L	A	S	P	S	L	S	P	G	R	S	L	T	P	P	LRSGFRTTPLASPSLSPGRSLTPPFRVKETR	Q8CJF7	1218	Casein kinase I substrate motif;Cdc2 kinase substrate motif;CDK kinase substrate motif;CDK1,2,4,6 kinase substrate motif;ERK1,2 kinase substrate motif;G protein-coupled receptor kinase 1 substrate motif;GSK3 kinase substrate motif;GSK-3, ERK1, ERK2, CDK5 substrate motif;MAPKAPK2 kinase substrate motif;WW domain binding motif	TTPLAS(0.002)PS(0.003)LS(0.996)PGR	120.87	0.995567	0.65764	0.393197	0.60821	0.513893	0.543235	7.58922	120.87	2	682.335	0.10761
Ranbp2	E3 SUMO-protein ligase RanBP2;Putative peptidyl-prolyl cis-trans isomerase	S	2117	1.45455	K	S	A	L	S	P	S	K	S	P	A	K	L	N	Q	S	G	TGFNFSFKSALSPSKSPAKLNQSGASVGTDE	Q9ERU9	2117	Cdc2 kinase substrate motif;CDK kinase substrate motif;CDK1,2,4,6 kinase substrate motif;ERK1,2 kinase substrate motif;Growth associated histone HI kinase substrate motif;GSK-3, ERK1, ERK2, CDK5 substrate motif;MAPKAPK2 kinase substrate motif;WW domain binding motif	S(0.005)ALS(0.995)PSKS(1)PAK	120.77	0.999939	0.508327	1.24537	NaN	-0.131985	0.540572	7.4807	132.31	2	616.77	-1.3266
Mphosph8	M-phase phosphoprotein 8	S	51	1.45382	K	G	T	V	A	V	G	D	S	E	E	D	G	E	D	V	F	EEKDAATKGTVAVGDSEEDGEDVFEVERILD	Q3TYA6;Q9JJB4;Q3ULG7;Q3UX18;Q9CU16	51;36;51;51;51	b-Adrenergic Receptor kinase substrate motif;Casein kinase II substrate motif;G protein-coupled receptor kinase 1 substrate motif;Pyruvate dehydrogenase kinase substrate motif	GTVAVGDS(1)EEDGEDVFEVER	270	1	0.571531	0.680594	0.35583	0.551437	0.539848	7.96296	270	2	1109.95	-0.20601
Sash1	SAM and SH3 domain-containing protein 1	S	829	1.4391	E	P	V	E	S	W	P	R	S	H	S	L	D	D	L	Q	G	CETLEGPEPVESWPRSHSLDDLQGDADVGKN	F8VQK5;P59808;Q6ZQ46	829;829;677	Casein kinase II substrate motif;MAPKAPK2 kinase substrate motif	S(0.934)HS(0.066)LDDLQGDADVGK	85.42	0.934028	0.664574	0.478299	0.652924	0.304879	0.525169	7.4962	105	3	546.233	-0.077343
Pdlim2	PDZ and LIM domain protein 2	S	205	1.43536	L	H	S	P	G	R	P	S	S	P	R	F	S	S	L	D	L	DSAVRVLLHSPGRPSSPRFSSLDLEEDSEVF	Q8R1G6;E9Q996	205;205	14-3-3 domain binding motif;Calmodulin-dependent protein kinase II substrate motif;Casein kinase I substrate motif;ERK1,2 kinase substrate motif;G protein-coupled receptor kinase 1 substrate motif;Growth associated histone HI kinase substrate motif;GSK3 kinase substrate motif;GSK-3, ERK1, ERK2, CDK5 substrate motif;MDC1 BRCT domain binding motif;PKA kinase substrate motif;PKC kinase substrate mot…	VLLHS(1)PGRPS(0.063)S(0.937)PR	122.08	0.937118	0.594357	0.311038	0.597933	0.582318	0.521411	8.05216	122.08	3	521.58	0.097321
Eif3b	Eukaryotic translation initiation factor 3 subunit B	T	81	1.43507	A	T	S	P	A	A	S	P	T	P	Q	S	A	E	R	S	P	AQSEEETATSPAASPTPQSAERSPSQEPSAP	Q8CIJ3;E9PX78;Q8JZQ9	81;81;81	Casein kinase I substrate motif;Casein kinase II substrate motif;DNA dependent Protein kinase substrate motif;G protein-coupled receptor kinase 1 substrate motif;GSK-3, ERK1, ERK2, CDK5 substrate motif;WW domain binding motif	PAAQS(0.007)EEET(0.021)AT(0.215)S(0.72)PAAS(0.043)PT(0.966)PQS(0.029)AER	70.699	0.965836	NaN	1.13921	0.040408	0.383736	0.521117	7.70308	106.32	3	858.353	-0.091942
Nedd4	E3 ubiquitin-protein ligase;E3 ubiquitin-protein ligase NEDD4	T	287	1.42967	R	P	S	P	D	D	D	L	T	D	E	D	N	D	D	M	Q	SRRTQWKRPSPDDDLTDEDNDDMQLQAQRAF	B2RSC8;P46935;Q3TUU1	287;287;287	Casein kinase I substrate motif;Casein kinase II substrate motif	RPSPDDDLT(1)DEDNDDMQLQAQR	121.84	1	0.640714	0.644133	0.436393	0.341482	0.51568	8.9151	184.15	2	1335.53	-0.43055
Ahnak		T	496	1.42418	K	M	K	G	A	K	V	K	T	P	E	M	I	I	Q	K	P	ATGGLEGKMKGAKVKTPEMIIQKPKISMQDV	E9Q616;F7BRM2;Q6UL10;Q8BRB8	496;231;231;496	Growth associated histone HI kinase substrate motif;GSK-3, ERK1, ERK2, CDK5 substrate motif;PKA kinase substrate motif;PKC kinase substrate motif;WW domain binding motif	VKT(1)PEMIIQKPK	39.016	1	0.527971	0.597412	0.313549	0.601606	0.510134	7.81075	124.62	3	503.27	-0.87916
Epb4.1l3		S	468	1.42341	Q	Y	A	T	T	K	G	I	S	Q	T	N	L	I	T	T	V	AAEVGTGQYATTKGISQTNLITTVTPEKKAE;DGEVGTGQYATTKGISQTNLITTVTPEKKAE	A7YY80;D0VYV7;E9PV52;Q8BGK4;F8WH44;D0VYV6;E9QN88	486;486;486;486;468;468;468	ATM kinase substrate motif;ATM kinase substrate motif;Casein kinase II substrate motif;Casein kinase II substrate motif;DNA dependent Protein kinase substrate motif;DNA dependent Protein kinase substrate motif;PKA kinase substrate motif;PKA kinase substrate motif;PKC kinase substrate motif;PKC kinase substrate motif	GIS(0.998)QT(0.002)NLITTVTPEK	148.2	0.997704	0.336855	0.179766	0.945082	0.575701	0.509351	7.5178	193.27	2	841.424	0.35601
Ahnak		S	5607	1.4187	K	G	H	Y	E	V	T	G	S	D	D	E	A	G	K	L	Q	GGLGSKSKGHYEVTGSDDEAGKLQGSGVSLA	E9Q616;Q8VDN3;E9Q1H8;Q6UIL4;Q8CGE7	5607;975;688;628;616	BARD1 BRCT domain binding motif;Casein kinase II substrate motif;G protein-coupled receptor kinase 1 substrate motif	GHYEVTGS(1)DDEAGK	145.29	1	0.361993	0.356482	0.60084	0.698951	0.504566	9.73452	227	3	515.535	0.30576
Clasp1	CLIP-associating protein 1	S	795	1.41792	N	A	M	R	V	L	S	T	S	T	D	L	E	A	A	V	A	GRIPGSVNAMRVLSTSTDLEAAVADALKKPV	E9QKH0;B2RY22;Q80TV8;E9Q6L0	795;750;794;766		VLS(0.001)T(0.027)S(0.945)T(0.027)DLEAAVADALK	231.77	0.945442	0.214871	0.430392	0.615685	0.754139	0.503772	7.81971	231.77	2	892.44	-0.55304
Tnks1bp1	182 kDa tankyrase-1-binding protein	S	1290	1.4158	N	M	A	P	G	A	G	C	S	P	G	E	P	R	E	L	G	TPDLGLRNMAPGAGCSPGEPRELGVGQVDWG	B9EKJ7;P58871	1290;1290	Casein kinase II substrate motif;ERK1,2 kinase substrate motif;G protein-coupled receptor kinase 1 substrate motif;GSK-3, ERK1, ERK2, CDK5 substrate motif;WW domain binding motif	NMAPGAGCS(1)PGEPR	123.14	1	0.46728	0.642101	0.546035	0.351074	0.501622	7.99306	149.52	2	748.787	-0.92441
Cald1		S	263	1.41552	P	S	R	S	G	G	R	A	S	G	D	K	E	A	E	G	A	QTENAFSPSRSGGRASGDKEAEGAPQVEAGK	E9QA16;Q8VCQ8;E9QA15;D3Z6I7;E9Q0M9;Q3UGC3;F6QLP8;F6T2Z7;F7CVG0;Q8VD79;F6ZAW1;F6RGN9	263;257;495;281;261;114;143;306;305;305;133;89	PKA kinase substrate motif;PKC kinase substrate motif	S(0.02)GGRAS(0.98)GDKEAEGAPQVEAGK	118.44	0.980475	0.393087	0.0501883	0.854179	0.707878	0.501333	8.0461	135.3	2	1040.97	-0.42668
Cobll1	Cordon-bleu protein-like 1	T	319	1.41521	R	P	S	F	T	R	S	N	T	I	S	K	P	Y	I	S	N	TPLVSKHRPSFTRSNTISKPYISNTLPSDAP	E9QPU9;Q3UMF0;B1AZ14;B1AZ15;D3Z6S2;B1AZ10;B1AZ11;B1AZ26	319;319;287;287;269;287;286;320	Calmodulin-dependent protein kinase II alpha substrate motif;Calmodulin-dependent protein kinase II substrate motif;Calmodulin-dependent protein kinase IV substrate motif;G protein-coupled receptor kinase 1 substrate motif;PKC kinase substrate motif	S(0.043)NT(0.954)ISKPY(0.002)IS(0.001)NTLPSDAPK	109.44	0.953958	-0.0279397	NaN	0.958252	0.572737	0.501017	7.63995	217.73	3	705.012	-0.14524
Abi1	Abl interactor 1	T	178	1.41426	T	L	S	R	T	N	P	P	T	Q	K	P	P	S	P	P	V	NQPARTGTLSRTNPPTQKPPSPPVSGRGTLG	B7ZCT9;Q8CBW3;B7ZCU0;Q3TJ64;Q3TJR5;B7ZCU3;B7ZCU4;Q6AXD3;Q3TMI0;Q3TPY5;Q3UAH6;B7ZCU5;B7ZCU2;B7ZCU1;Q3UBL3	178;178;178;173;173;178;178;173;173;173;173;178;178;173;49	DNA dependent Protein kinase substrate motif;G protein-coupled receptor kinase 1 substrate motif;PKA kinase substrate motif;PKC kinase substrate motif	T(0.015)NPPT(0.981)QKPPS(0.018)PPVS(0.083)GRGT(0.903)LGR	48.907	0.980741	NaN	0.0402613	1.54979	-0.0899048	0.500049	7.99528	81.448	3	768.701	-0.63454
Cobll1	Cordon-bleu protein-like 1	T	304	1.41321	E	Q	T	A	S	A	P	A	T	P	L	V	S	K	H	R	P	QRSKKKREQTASAPATPLVSKHRPSFTRSNT	E9QPU9;Q3UMF0;B1AZ14;B1AZ15;D3Z6S2;B1AZ10;B1AZ11;B1AZ26	304;304;272;272;254;272;271;305	ERK1,2 kinase substrate motif;G protein-coupled receptor kinase 1 substrate motif;GSK3, Erk1, Erk2 and CDK5 kinase motif;GSK-3, ERK1, ERK2, CDK5 substrate motif;MAPKAPK2 kinase substrate motif;WW domain binding motif	EQT(0.011)AS(0.989)APAT(1)PLVSK	198.51	1	0.638398	-0.230364	0.440303	1.14759	0.498981	7.86396	200.67	2	780.341	-0.18659
Dennd1a	DENN domain-containing protein 1A	S	592	1.41176	L	Q	P	L	G	Q	A	K	S	L	E	D	L	R	A	P	K	SLDVEAPLQPLGQAKSLEDLRAPKDLREQPG	Q8K382;E9Q596;F8WJG6;Q5DTW3;A2ALU3	592;448;421;421;198	Casein kinase II substrate motif;Pyruvate dehydrogenase kinase substrate motif	S(1)LEDLRAPK	65.842	1	0.611833	0.569102	NaN	0.311542	0.497493	6.98476	91.961	2	554.774	-0.061679
Peak1	Pseudopodium-enriched atypical kinase 1	S	1410	1.41086	K	A	E	D	G	T	E	D	S	E	E	E	G	K	A	E	T	EDPDAPEKAEDGTEDSEEEGKAETLGGNPEP	Q69Z38	1410	b-Adrenergic Receptor kinase substrate motif;BARD1 BRCT domain binding motif;Casein kinase II substrate motif;G protein-coupled receptor kinase 1 substrate motif	LLPWEDPDAPEKAEDGT(0.068)EDS(0.932)EEEGK	46.569	0.932075	-0.218414	-0.546835	1.19317	1.55839	0.496578	7.92062	67.11	3	956.066	0.38534
Gps1		S	18	1.40513	A	S	S	S	A	S	D	L	S	R	S	P	A	H	S	R	S	GSPAPSSASSSASDLSRSPAHSRSDLRPGTA	G3UXW9	18	Casein kinase II substrate motif;G protein-coupled receptor kinase 1 substrate motif	GSPAPSSASSSAS(0.024)DLS(0.574)RS(0.382)PAHS(0.02)R	101.17	0.57364	0.437441	1.06212	NaN	-0.0274372	0.490708	7.30003	101.17	3	760.34	0.68694
Impact	Protein IMPACT	S	137	1.40505	K	T	E	E	V	E	V	E	S	E	E	D	P	I	L	E	H	PDPDVKKKTEEVEVESEEDPILEHPPENPVK	O55091	137	b-Adrenergic Receptor kinase substrate motif;Casein kinase I substrate motif;Casein kinase II substrate motif;G protein-coupled receptor kinase 1 substrate motif;Pyruvate dehydrogenase kinase substrate motif	TEEVEVES(1)EEDPILEHPPENPVK	182.7	1	0.630499	0.648741	0.292917	0.390321	0.490619	8.45829	182.7	3	909.076	-0.92401
Pygo2		T	301	1.40496	S	S	S	G	R	G	G	G	T	P	D	A	N	S	L	A	P	NQPSFPPSSSGRGGGTPDANSLAPPGKAGGG	Q80V76;Q3V113;Q80V05	301;264;234	GSK-3, ERK1, ERK2, CDK5 substrate motif;WW domain binding motif	GGGT(1)PDANSLAPPGK	138.05	1	0.65361	0.729879	0.336828	0.241799	0.490529	8.06595	157.47	2	709.819	0.22195
Ahnak		T	5502	1.40403	K	S	K	G	K	G	G	V	T	G	S	P	E	A	S	I	S	MPKHIFSKSKGKGGVTGSPEASISGSKGDLK	E9Q616;Q8VDN3;E9Q1H8;Q6UIL4;Q8CGE7	5502;870;583;523;511	PKA kinase substrate motif	GGVT(0.949)GS(0.051)PEAS(0.803)IS(0.216)GS(0.981)KGDLK	159.13	0.949108	0.365245	0.786931	0.191244	0.614867	0.489572	8.9842	159.13	2	993.897	0.10319
40057	Septin-9	T	42	1.40297	E	E	I	E	P	P	N	S	T	P	P	R	R	V	Q	T	P	LKRSFEVEEIEPPNSTPPRRVQTPLLRATVA	Q80UG5;A2A6U3	42;24	Cdc2 kinase substrate motif;CDK1,2,4,6 kinase substrate motif;Growth associated histone HI kinase substrate motif;GSK-3, ERK1, ERK2, CDK5 substrate motif;MDC1 BRCT domain binding motif;Plk1 PBD domain binding motif;WW domain binding motif	SFEVEEIEPPNS(0.114)T(0.886)PPRR	55.213	0.885758	0.85599	NaN	0.388733	0.220732	0.488485	7.5236	69.92	3	688.653	-0.036031
Atxn2l	Ataxin-2-like protein	S	562	1.39879	Q	F	K	L	Q	P	S	S	S	P	E	T	G	L	D	P	F	ELRKFGAQFKLQPSSSPETGLDPFPSRILKE	Q7TQH0;Q3TGG2;E9Q5Q0;Q3TYH7	562;476;442;442	Casein kinase I substrate motif;Casein kinase II substrate motif;ERK1,2 kinase substrate motif;GSK-3, ERK1, ERK2, CDK5 substrate motif;MDC1 BRCT domain binding motif;Plk1 PBD domain binding motif;WW domain binding motif	LQPSS(0.04)S(0.959)PET(0.001)GLDPFPSR	139.7	0.958624	0.353097	0.621149	0.344666	0.617808	0.48418	8.04708	201.61	2	947.933	-0.69092
Pdha1	Pyruvate dehydrogenase E1 component subunit alpha, somatic form, mitochondrial	S	295	1.39615	Y	R	Y	H	G	H	S	M	S	D	P	G	V	S	Y	R	T	ILMELQTYRYHGHSMSDPGVSYRTREEIQEV	P35486;Q3UFJ3	295;295		YHGHS(0.036)MS(0.964)DPGVSYR	120.53	0.963566	0.413486	-0.236384	0.927825	0.820871	0.481449	8.15467	120.53	3	558.224	0.34553
Huwe1	E3 ubiquitin-protein ligase HUWE1	T	1905	1.3952	L	P	A	P	R	G	S	G	T	A	S	D	D	E	F	E	N	NCCIRIALPAPRGSGTASDDEFENLRIKGPN	A2AFQ0;Q4JG03;Q7TMY8	1905;1905;1905	Casein kinase II substrate motif	GS(0.022)GT(0.965)AS(0.013)DDEFENLR	131.13	0.964871	0.55817	0.476434	0.474953	0.412347	0.480476	7.95452	131.13	2	789.309	0.31321
Ahnak		S	5566	1.3895	D	E	R	E	F	S	A	P	S	T	P	T	G	T	L	E	F	HRSNSFSDEREFSAPSTPTGTLEFAGGDAKG	E9Q616;Q8VDN3;E9Q1H8;Q6UIL4;Q8CGE7	5566;934;647;587;575	Casein kinase I substrate motif;Casein kinase II substrate motif;DNA dependent Protein kinase substrate motif	S(0.339)NS(0.465)FS(0.196)DEREFS(0.015)APS(0.96)T(0.024)PTGTLEFAGGDAK	111.38	0.959991	0.246104	0.49917	0.462177	0.690801	0.474563	8.71385	137.21	3	1022.42	0.12876
Smarcad1	SWI/SNF-related matrix-associated actin-dependent regulator of chromatin subfamily A containing DEAD/H box 1	S	144	1.38894	P	S	V	T	R	R	N	D	S	S	E	L	E	D	L	S	E	DEESHDLPSVTRRNDSSELEDLSELEDLKDA	Q04692;Q3UYR6;Q3UGK6	144;144;144	14-3-3 domain binding motif;b-Adrenergic Receptor kinase substrate motif;Calmodulin-dependent protein kinase II substrate motif;Casein kinase II substrate motif;PKA kinase substrate motif;PKC kinase substrate motif;ZIP kinase substrate motif	RNDS(1)S(1)ELEDLSELEDLKDAK	137.24	1	1.41932	-0.498831	-0.736821	1.71227	0.473985	7.56034	188.04	3	822.682	0.75824
Smarcad1	SWI/SNF-related matrix-associated actin-dependent regulator of chromatin subfamily A containing DEAD/H box 1	S	145	1.38894	S	V	T	R	R	N	D	S	S	E	L	E	D	L	S	E	L	EESHDLPSVTRRNDSSELEDLSELEDLKDAK	Q04692;Q3UYR6;Q3UGK6	145;145;145	Casein kinase II substrate motif;G protein-coupled receptor kinase 1 substrate motif;MDC1 BRCT domain binding motif;Plk1 PBD domain binding motif	RNDS(1)S(1)ELEDLSELEDLKDAK	137.24	1	1.41932	-0.498831	-0.736821	1.71227	0.473985	7.63533	188.04	3	822.682	0.75824
Huwe1	E3 ubiquitin-protein ligase HUWE1	S	1907	1.38679	A	P	R	G	S	G	T	A	S	D	D	E	F	E	N	L	R	CIRIALPAPRGSGTASDDEFENLRIKGPNAV	A2AFQ0;Q4JG03;Q7TMY8	1907;1907;1907	BARD1 BRCT domain binding motif;Casein kinase II substrate motif;MAPKAPK2 kinase substrate motif	GSGTAS(1)DDEFENLR	232.78	0.999988	0.532766	0.502942	0.491085	0.360194	0.471746	8.37188	232.78	2	789.309	0.28103
Ubap2l	Ubiquitin-associated protein 2-like	S	625	1.38482	T	Q	T	R	R	Y	P	S	S	I	S	S	S	P	Q	K	D	PLYEQRSTQTRRYPSSISSSPQKDLTQAKNG	Q80X50;E9Q9Q3;Q8BJ53;Q812D5;Q812D4;E9PZA1;Q3TSB0;Q80U73	625;605;605;605;605;101;9;126	Casein kinase I substrate motif;Casein kinase II substrate motif;G protein-coupled receptor kinase 1 substrate motif;GSK3 kinase substrate motif;MDC1 BRCT domain binding motif;Plk1 PBD domain binding motif	RYPS(0.02)S(0.945)IS(0.527)S(0.403)S(0.105)PQK	103.79	0.94538	0.25882	-0.351719	0.920052	1.05164	0.469698	7.97761	139.34	2	748.813	0.17837
Dock7	Dedicator of cytokinesis protein 7	S	1420	1.38443	R	S	R	G	Q	L	E	R	S	P	S	G	S	A	F	G	S	ARQEMVRRSRGQLERSPSGSAFGSQENLRWR	Q8R1A4;A2A9M5;E9PX48;A2A9M4;Q3U806	1420;1420;1390;17;1	Casein kinase I substrate motif;Casein kinase II substrate motif;ERK1,2 kinase substrate motif;G protein-coupled receptor kinase 1 substrate motif;Growth associated histone HI kinase substrate motif;GSK3 kinase substrate motif;GSK-3, ERK1, ERK2, CDK5 substrate motif;WW domain binding motif	S(0.966)PS(0.034)GSAFGSQENLR	140.8	0.966097	0.654069	-0.396973	0.79616	0.823907	0.469291	7.73542	147.7	2	758.825	0.43406
Mtap4	Microtubule-associated protein;Microtubule-associated protein;Microtubule-associated protein 4;Microtubule-associated protein;Microtubule-associated protein;Microtubule-associated protein;Microtubule-associated protein	S	1046	1.38439	E	K	A	Q	A	K	V	G	S	L	D	N	V	G	H	L	P	SQKLNFKEKAQAKVGSLDNVGHLPAGGAVKT	E9PZ43;E9PWC0;P27546;E9QPW8;E9QKJ8;F6V4Z1;F6XPV7	855;824;1046;1008;824;18;13	Phosphorylase kinase substrate motif;PKA kinase substrate motif;PKC kinase substrate motif	VGS(1)LDNVGHLPAGGAVK	159.77	1	0.617487	0.631337	0.274774	0.353395	0.469248	8.57977	160.67	2	835.917	0.021899
Ranbp1	Ran-specific GTPase-activating protein	S	7	1.38103	_	_	M	A	A	A	K	D	S	H	E	D	H	D	T	S	T	_________MAAAKDSHEDHDTSTENADESN	P34022;Q3U6M5	7;7	b-Adrenergic Receptor kinase substrate motif;Casein kinase II substrate motif;PKA kinase substrate motif;PKC kinase substrate motif;Pyruvate dehydrogenase kinase substrate motif	DS(0.929)HEDHDT(0.726)S(0.158)T(0.158)ENADES(0.029)NHDPQFEPIVSLPEQEIK	77.984	0.929161	0.290542	-0.00313409	0.596732	0.978833	0.465743	8.01102	77.984	4	1013.16	0.36509
Sash1	SAM and SH3 domain-containing protein 1	S	831	1.37755	V	E	S	W	P	R	S	H	S	L	D	D	L	Q	G	D	A	TLEGPEPVESWPRSHSLDDLQGDADVGKNVP	F8VQK5;P59808;Q6ZQ46	831;831;679	14-3-3 domain binding motif;Calmodulin-dependent protein kinase II substrate motif;Casein kinase II substrate motif;Phosphorylase kinase substrate motif;PKA kinase substrate motif;PKC kinase substrate motif;Pyruvate dehydrogenase kinase substrate motif	SHS(1)LDDLQGDADVGK	204.47	0.999982	0.57657	0.320889	0.61072	0.340258	0.462109	8.139	204.47	2	818.846	0.67855
Ctnnb1	Catenin beta-1	S	675	1.37672	P	Q	D	Y	K	K	R	L	S	V	E	L	T	S	S	L	F	FRMSEDKPQDYKKRLSVELTSSLFRTEPMAW	Q02248;Q3UZT7;Q80VE7;F7CRC6	675;675;448;134	Aurora-A kinase substrate motif;Casein kinase II substrate motif;G protein-coupled receptor kinase 1 substrate motif;PAK2 kinase substrate motif;Phosphorylase kinase substrate motif;Pim1 kinase substrate sequence;PKA kinase substrate motif;PKC kinase substrate motif	RLS(1)VELTSSLFR	179.55	0.999996	0.507922	0.16954	0.901527	0.265934	0.461231	7.57566	179.55	2	744.385	0.45659
Srrm2	Serine/arginine repetitive matrix protein 2	T	2350	1.3765	A	Y	D	R	V	S	G	R	T	S	P	L	M	L	D	R	A	SPRVPLSAYDRVSGRTSPLMLDRARSRTPPS	Q8BTI8	2350		VS(0.002)GRT(0.991)S(0.007)PLMLDR	107.82	0.990983	0.128557	0.628354	0.0302655	1.05682	0.460999	8.55311	125.73	2	706.342	-0.0098279
Eif3j	Eukaryotic translation initiation factor 3 subunit J	S	16	1.37629	A	A	A	A	A	A	G	D	S	D	S	W	D	A	D	T	F	MAAAAAAAAAAAAGDSDSWDADTFSMEDPVR	Q66JS6	16	b-Adrenergic Receptor kinase substrate motif;Casein kinase II substrate motif	AAAAAAAAAAAAGDS(0.995)DS(0.005)WDADTFSMEDPVRK	201.29	0.995436	0.350271	0.505281	0.379526	0.608056	0.460784	9.15119	217.86	3	1044.78	0.35299
Eaf1	ELL-associated factor 1	S	165	1.3737	T	S	P	L	K	D	N	P	S	P	E	P	Q	L	D	D	I	KPPAGPKTSPLKDNPSPEPQLDDIKRELRAE	Q9D4C5	165	Casein kinase I substrate motif;Casein kinase II substrate motif;DNA dependent Protein kinase substrate motif;ERK1,2 kinase substrate motif;GSK-3, ERK1, ERK2, CDK5 substrate motif;PKA kinase substrate motif;WW domain binding motif	T(0.5)S(0.5)PLKDNPS(1)PEPQLDDIKR	106.62	1	0.441483	0.245252	0.600402	0.54515	0.458072	8.36496	107.34	3	770.685	0.43957
Cdk2	Cyclin-dependent kinase 2;Cyclin-dependent kinase 3;Cyclin-dependent kinase 1	T	14	1.37003	K	V	E	K	I	G	E	G	T	Y	G	V	V	Y	K	A	K	__MENFQKVEKIGEGTYGVVYKAKNKLTGEV	P97377;Q3U307;Q3UGB9;Q80YP0;Q3U6X7;P11440;Q99JW7;D3Z2T9	14;14;14;14;14;14;12;14		IGEGT(1)Y(1)GVVYK	140.08	1	NaN	-0.206678	1.06945	0.499851	0.454208	7.86655	200.93	2	673.277	-0.18213
Tenc1	Tensin-like C1 domain-containing phosphatase	S	455	1.36871	T	E	P	A	V	R	W	D	S	Y	E	N	F	N	Q	H	H	VSVDYNTTEPAVRWDSYENFNQHHEDSVDGA	Q8CGB6	455	14-3-3 domain binding motif;AMP-activated protein kinase substrate motif;b-Adrenergic Receptor kinase substrate motif;Calmodulin-dependent protein kinase II substrate motif;Casein kinase II substrate motif;HMGCoA Reductase kinase substrate motif;PKA kinase substrate motif;PKC kinase substrate motif	WDS(0.766)Y(0.209)ENFNQHHEDS(0.025)VDGALAHTR	41.798	0.765723	0.506297	0.614757	0.237405	NaN	0.45282	7.85845	68.88	4	702.791	-0.84084
Nap1l1	Nucleosome assembly protein 1-like 1	T	89	1.36584	E	R	L	D	G	L	V	D	T	P	T	G	Y	I	E	S	L	QILAALQERLDGLVDTPTGYIESLPKVVKRR	E9PW66;P28656;Q8BSH9;Q3TF41	89;62;62;62	b-Adrenergic Receptor kinase substrate motif;GSK-3, ERK1, ERK2, CDK5 substrate motif;WW domain binding motif	LDGLVDT(0.928)PT(0.072)GYIESLPK	80.382	0.927956	-0.125746	0.485736	0.989363	NaN	0.449784	7.07646	130.36	2	949.463	-0.8876
Nap1l1	Nucleosome assembly protein 1-like 1	S	37	1.36515	A	D	I	D	N	K	E	Q	S	E	L	D	Q	D	L	E	D	IWSSYKMADIDNKEQSELDQDLEDVEEVEEE	E9PW66;P28656;Q8BSH9;Q3TF41	37;10;10;10	Casein kinase II substrate motif;G protein-coupled receptor kinase 1 substrate motif;PKA kinase substrate motif;PKC kinase substrate motif;Pyruvate dehydrogenase kinase substrate motif	ADIDNKEQS(1)ELDQDLEDVEEVEEEETGEETKIK	149.04	1	0.376068	0.0261627	0.697055	0.696938	0.449056	8.41734	186.84	3	1319.91	0.040124
Tnks1bp1	182 kDa tankyrase-1-binding protein	S	887	1.36419	D	W	E	F	G	K	R	A	S	V	S	T	N	Q	D	T	D	TRDASLQDWEFGKRASVSTNQDTDENDQELG	B9EKJ7;P58871	887;887	Aurora-A kinase substrate motif;Calmodulin-dependent protein kinase II substrate motif;Casein kinase I substrate motif;Casein kinase II substrate motif;PAK2 kinase substrate motif;Phosphorylase kinase substrate motif;PKA kinase substrate motif;PKC kinase substrate motif	RAS(0.96)VS(0.032)T(0.008)NQDTDENDQELGMK	152.89	0.960428	0.319155	-0.306591	0.980626	0.798968	0.44804	7.93113	165.66	3	773.325	0.19944
Mprip	Myosin phosphatase Rho-interacting protein	T	540	1.36279	R	R	R	E	G	R	S	K	T	F	D	W	A	E	F	R	P	KKSRARERRREGRSKTFDWAEFRPIQQALAQ	P97434;F6RND9;Q5SWZ6;Q5SWZ5;F6S5I0;E9PZ80;Q8C8T6;Q8CBS0	540;526;526;504;351;63;504;334	Calmodulin-dependent protein kinase II substrate motif;G protein-coupled receptor kinase 1 substrate motif;PKC kinase substrate motif	S(0.025)KT(0.975)FDWAEFRPIQQALAQER	124.4	0.974962	0.484911	0.0219061	0.763954	0.515501	0.446568	8.33518	142.79	3	834.404	-0.53745
Svil	Supervillin	S	260	1.36261	T	E	A	R	A	R	Y	P	S	G	S	E	I	P	V	V	E	PGDSPLPTEARARYPSGSEIPVVEDEEKVDE	E3VVQ8;E9Q983;E9Q3Z5;Q8K4L3;Q8K4L2	260;260;550;632;632	14-3-3 domain binding motif;Akt kinase substrate motif;Calmodulin-dependent protein kinase II substrate motif;Casein kinase II substrate motif;DNA dependent Protein kinase substrate motif;MAPKAPK1 kinase substrate motif;PKA kinase substrate motif;PKC kinase substrate motif	YPS(0.999)GS(0.001)EIPVVEDEEKVDER	146.15	0.998878	0.471552	0.172231	0.646812	0.494902	0.446374	8.45676	202.44	3	753.002	0.33187
Nab2	NGFI-A-binding protein 2	S	171	1.36142	P	L	E	L	G	E	K	L	S	P	L	P	G	G	P	G	A	RSFSPKSPLELGEKLSPLPGGPGAGDPRIWP	Q61127;Q3TYF1;Q3U247;E9Q7A4	171;171;171;171	Casein kinase I substrate motif;ERK1,2 kinase substrate motif;GSK-3, ERK1, ERK2, CDK5 substrate motif;PKA kinase substrate motif;PKC kinase substrate motif;WW domain binding motif	LS(1)PLPGGPGAGDPR	84.859	1	0.390998	0.232292	0.766946	0.390226	0.445116	7.85687	96.773	2	685.827	-0.16413
Tenc1	Tensin-like C1 domain-containing phosphatase	S	832	1.35921	H	S	P	R	A	G	S	V	S	P	G	S	P	P	Y	L	Q	GYPSPGAHSPRAGSVSPGSPPYLQPRKLGYE	Q8CGB6	832	Casein kinase I substrate motif;Casein kinase II substrate motif;ERK1,2 kinase substrate motif;G protein-coupled receptor kinase 1 substrate motif;GSK-3, ERK1, ERK2, CDK5 substrate motif;WW domain binding motif	AGS(0.047)VS(0.953)PGSPPYLQPR	102.08	0.953168	0.679964	0.440846	0.207494	NaN	0.442768	7.15622	103.01	2	796.877	0.33906
Ddx42	ATP-dependent RNA helicase DDX42	Y	183	1.35864	E	E	E	E	D	N	L	E	Y	D	S	D	G	N	P	I	A	PTAGVVQEEEEDNLEYDSDGNPIAPSKKIID	Q810A7	183	EGFR kinase substrate motif;FRIP PTB domain binding motif;Src kinase substrate motif;TC-PTP phosphatase substrate motif	YMAENPTAGVVQEEEEDNLEY(0.861)DS(0.139)DGNPIAPSKK	133.44	0.860883	0.0710762	1.21263	0.320072	0.164868	0.442162	8.52825	133.44	3	1245.87	-0.14148
Cdc42ep1	Cdc42 effector protein 1	S	207	1.3557	N	P	E	L	R	R	S	D	S	L	L	S	F	R	F	D	L	FPSEPTPNPELRRSDSLLSFRFDLDLGPSLL	Q91W92	207	14-3-3 domain binding motif;AMP-activated protein kinase substrate motif;b-Adrenergic Receptor kinase substrate motif;Calmodulin-dependent protein kinase I substrate motif;Calmodulin-dependent protein kinase II alpha substrate motif;Calmodulin-dependent protein kinase II substrate motif;Calmodulin-dependent protein kinase IV substrate motif;Casein kinase I substrate motif;Casein kinase II substra…	RSDS(1)LLSFR	130.1	0.999994	0.748976	0.0861043	0.5003	0.420781	0.43904	7.72048	164.64	2	580.777	-0.13804
Uso1	General vesicular transport factor p115	S	940	1.35445	H	P	V	E	E	E	D	E	S	G	D	Q	E	D	D	D	D	SKLKDLGHPVEEEDESGDQEDDDDEIDDGDK	Q9Z1Z0	940	b-Adrenergic Receptor kinase substrate motif;Casein kinase I substrate motif	LKDLGHPVEEEDES(1)GDQEDDDDEIDDGDKDQDI	63.625	1	0.484087	0.437654	0.458029	0.371068	0.437709	9.47141	153.27	4	953.126	0.58345
Eif3b	Eukaryotic translation initiation factor 3 subunit B	S	68	1.35418	V	R	A	K	P	A	A	Q	S	E	E	E	T	A	T	S	P	EAGPEPEVRAKPAAQSEEETATSPAASPTPQ	Q8CIJ3;E9PX78;Q8JZQ9	68;68;68	BARD1 BRCT domain binding motif;Casein kinase II substrate motif;G protein-coupled receptor kinase 1 substrate motif	AKPAAQS(0.993)EEET(0.035)AT(0.197)S(0.773)PAAS(0.914)PT(0.081)PQS(0.007)AER	82.336	0.993192	1.11263	-0.12477	0.88454	-0.122739	0.437416	8.73458	100.44	3	951.386	-0.045802
Fnbp4	Formin-binding protein 4	S	440	1.35232	G	D	G	S	V	S	G	S	S	P	R	S	D	I	S	Q	P	ELRALEEGDGSVSGSSPRSDISQPASQDGVR	Q6ZQ03	440	Casein kinase I substrate motif;Casein kinase II substrate motif;ERK1,2 kinase substrate motif;Growth associated histone HI kinase substrate motif;GSK-3, ERK1, ERK2, CDK5 substrate motif;MDC1 BRCT domain binding motif;PKA kinase substrate motif;PKC kinase substrate motif;Plk1 PBD domain binding motif;WW domain binding motif	ALEEGDGSVSGS(0.007)S(0.993)PR	169.67	0.99266	0.549521	0.654252	0.27181	0.266177	0.43544	7.36346	169.67	2	764.32	-1.5362
Matr3	Matrin-3	S	194	1.3516	E	K	R	H	F	R	R	D	S	F	D	D	R	G	P	S	L	VPRDDWEEKRHFRRDSFDDRGPSLNPVLDYD	Q6ZQ61;Q3TTX0;Q4FJT0;Q5BL18;Q8K310;Q9R0U5	194;188;188;188;188;188	14-3-3 domain binding motif;b-Adrenergic Receptor kinase substrate motif;Calmodulin-dependent protein kinase II substrate motif;Casein kinase II substrate motif;PAK2 kinase substrate motif;PKA kinase substrate motif;PKC epsilon kinase substrate motif;PKC kinase substrate motif;Pyruvate dehydrogenase kinase substrate motif	RDS(0.999)FDDRGPS(0.001)LNPVLDYDHGSR	116.38	0.999137	0.418136	0.305912	0.373851	0.640771	0.434667	8.91483	121.62	3	866.717	-0.22918
Srrm2	Serine/arginine repetitive matrix protein 2	S	1646	1.35113	S	H	T	P	P	R	R	R	S	S	R	S	S	P	E	L	T	SIEPKTKSHTPPRRRSSRSSPELTRKARVSR	Q8BTI8	1646	14-3-3 domain binding motif;Calmodulin-dependent protein kinase II substrate motif;Casein kinase I substrate motif;Casein kinase II substrate motif;G protein-coupled receptor kinase 1 substrate motif;GSK3 kinase substrate motif;PAK2 kinase substrate motif;PKA kinase substrate motif;PKC epsilon kinase substrate motif;PKC kinase substrate motif	S(0.72)S(0.244)RS(0.12)S(0.914)PELT(0.002)R	58.723	0.720228	0.294077	NaN	0.436881	0.571557	0.434172	7.59351	75.968	2	640.258	-0.17374
Ahnak		S	5510	1.35077	T	G	S	P	E	A	S	I	S	G	S	K	G	D	L	K	S	SKGKGGVTGSPEASISGSKGDLKSSKASLGS	E9Q616;Q8VDN3;E9Q1H8;Q6UIL4;Q8CGE7	5510;878;591;531;519	Casein kinase II substrate motif	GGVT(0.812)GS(0.188)PEAS(1)IS(0.981)GS(0.019)KGDLK	132.78	0.981271	0.998701	0.500802	-0.473319	0.708962	0.433787	8.64046	221.6	2	993.897	0.21541
Sh3kbp1	SH3 domain-containing kinase-binding protein 1	S	230	1.34787	K	P	I	K	L	R	P	R	S	I	E	V	E	N	D	F	L	FGDIFKDKPIKLRPRSIEVENDFLPVEKTIG	Q3TA88;B1AVE8;A2AG61;Q8R550;E9Q0C1;B1AZ85	230;193;274;274;193;171	14-3-3 domain binding motif;Calmodulin-dependent protein kinase II substrate motif;Casein kinase II substrate motif;MAPKAPK1 kinase substrate motif;p70 Ribosomal S6 kinase substrate motif;Phosphorylase kinase substrate motif;PKA kinase substrate motif;PKC kinase substrate motif	S(1)IEVENDFLPVEK	211.12	1	0.449218	-0.157367	0.852954	0.577918	0.430681	8.50865	285.19	2	799.871	-0.21729
Ahnak		T	159	1.34763	T	I	T	V	T	R	R	V	T	A	Y	T	V	D	V	T	G	LGETQSRTITVTRRVTAYTVDVTGREGVKDI	E9Q616;Q8BRB8	159;159	AMP-activated protein kinase substrate motif;Calmodulin-dependent protein kinase I substrate motif;Calmodulin-dependent protein kinase II substrate motif;Calmodulin-dependent protein kinase IV substrate motif;Casein kinase I substrate motif;Chk1 kinase substrate motif;Dual specificity protein phosphatase 6 substrate motif;PAK2 kinase substrate motif;PKA kinase substrate motif;PKC kinase substrate…	RVT(1)AYTVDVTGR	143.28	0.999999	1.25779	-0.177164	-0.123799	0.764861	0.430423	7.69503	156.67	2	709.345	-0.69494
Dnajc21		S	283	1.3465	Y	E	K	E	F	G	D	G	S	D	E	N	E	V	E	D	Q	LQEMEARYEKEFGDGSDENEVEDQEPRNGLD	E9Q8D0;F6QYD2;Q3URP7	283;132;100	Casein kinase II substrate motif	YEKEFGDGS(1)DENEVEDQEPR	223.18	1	0.666848	0.462367	0.297733	0.289898	0.429211	8.49282	249.14	2	1226.48	0.31457
Dclk1	Serine/threonine-protein kinase DCLK1	S	32	1.3445	G	S	R	V	N	G	L	P	S	P	T	H	S	A	H	C	S	KAQRYSRGSRVNGLPSPTHSAHCSFYRTRTL	Q8CHG1;Q9JLM8;A3KN70;Q9JLM7;Q8BRN4;Q3UGP0;Q80VB6;Q8VDT3	84;32;32;32;32;32;32;32	Casein kinase I substrate motif;Casein kinase II substrate motif;DNA dependent Protein kinase substrate motif;ERK1,2 kinase substrate motif;G protein-coupled receptor kinase 1 substrate motif;GSK3 kinase substrate motif;GSK-3, ERK1, ERK2, CDK5 substrate motif;WW domain binding motif	VNGLPS(0.943)PT(0.974)HS(0.046)AHCS(0.019)FY(0.018)R	60.918	0.942892	0.349365	NaN	0.522033	0.409796	0.427065	7.29583	64.203	3	697.283	-0.33882
Smn1	Survival motor neuron protein	S	25	1.34076	L	F	R	R	G	T	G	Q	S	D	D	S	D	I	W	D	D	SEQEDTVLFRRGTGQSDDSDIWDDTALIKAY	P97801;Q3UMN7;Q549F9;Q5PXT3	25;25;25;25	Casein kinase I substrate motif;Casein kinase II substrate motif	RGTGQS(1)DDS(1)DIWDDTALIK	174.86	0.999971	0.251083	0.896078	0.106886	0.438151	0.423049	7.74924	174.86	2	1126.96	0.55973
Cdk18	Cyclin-dependent kinase 18	S	109	1.33697	L	T	R	M	S	R	R	A	S	L	S	D	I	G	F	G	K	NPGLPKPLTRMSRRASLSDIGFGKLETYVKL	Q04899;Q0VDL6	109;109	14-3-3 domain binding motif;AMP-activated protein kinase substrate motif;Aurora-A kinase substrate motif;Calmodulin-dependent protein kinase I substrate motif;Calmodulin-dependent protein kinase II alpha substrate motif;Calmodulin-dependent protein kinase II substrate motif;Calmodulin-dependent protein kinase IV substrate motif;Casein kinase II substrate motif;Chk1 kinase substrate motif;MAPKAPK2…	RAS(1)LSDIGFGK	130.72	0.999871	0.727005	-0.560941	0.927743	0.58208	0.418972	8.07041	130.72	2	615.798	-0.14839
Cdc42ep1	Cdc42 effector protein 1	S	121	1.3337	S	P	I	I	K	N	A	I	S	L	P	Q	L	N	Q	A	T	SPAPPPISPIIKNAISLPQLNQATYDSLVMG	Q91W92	121	AMP-activated protein kinase substrate motif;PKA kinase substrate motif	NAIS(1)LPQLNQATYDSLVMGK	138.49	1	0.572114	0.0710762	0.507603	0.51095	0.415436	8.09216	240.26	3	753.696	-0.57344
Ppp1r2	Protein phosphatase inhibitor 2	S	122	1.33346	K	Y	R	T	R	E	Q	E	S	S	G	E	E	D	N	D	L	AAEGSEPKYRTREQESSGEEDNDLSPEEREK	Q9DCL8;D3Z3A0;Q9CT86	122;122;81	b-Adrenergic Receptor kinase substrate motif;Casein kinase I substrate motif;Casein kinase II substrate motif	EQES(1)S(1)GEEDNDLSPEER	75.018	1	0.590722	0.333424	0.392402	0.344154	0.415175	8.54676	252.23	2	1055.36	0.26734
Ppp1r2	Protein phosphatase inhibitor 2	S	123	1.33346	Y	R	T	R	E	Q	E	S	S	G	E	E	D	N	D	L	S	AEGSEPKYRTREQESSGEEDNDLSPEEREKK	Q9DCL8;D3Z3A0;Q9CT86	123;123;82	Casein kinase II substrate motif;MDC1 BRCT domain binding motif;Plk1 PBD domain binding motif	EQES(1)S(1)GEEDNDLSPEER	75.018	1	0.590722	0.333424	0.392402	0.344154	0.415175	8.5311	252.23	2	1055.36	0.26734
Marcks	Myristoylated alanine-rich C-kinase substrate	S	113	1.33298	E	A	E	P	A	E	P	S	S	P	A	A	E	A	E	G	A	AADKEAAEAEPAEPSSPAAEAEGASASSTSS	P26645;Q05BL6	113;113	Casein kinase I substrate motif;ERK1,2 kinase substrate motif;GSK-3, ERK1, ERK2, CDK5 substrate motif;MDC1 BRCT domain binding motif;Plk1 PBD domain binding motif;WW domain binding motif	DEAAAATEPGAGAADKEAAEAEPAEPS(0.255)S(0.745)PAAEAEGASASSTSSPK	86.884	0.745209	1.06343	-0.607001	0.927304	0.274878	0.414654	7.72575	89.111	3	1407.94	0.11602
Rsl1d1		T	373	1.33268	P	Q	L	V	P	I	G	E	T	P	D	K	E	N	V	K	M	EECEEAIPQLVPIGETPDKENVKMQENITGK	Q3UL54;Q8K235;Q3TH37;Q3TS64;Q8BVY0;Q3TLJ3;E9Q0A1;Q3TAJ5;Q3TGI9;Q3TN25	373;360;360;360;360;360;294;294;294;294	b-Adrenergic Receptor kinase substrate motif;Cdc2 kinase substrate motif;CDK1,2,4,6 kinase substrate motif;CDK5 kinase substrate motif;GSK-3, ERK1, ERK2, CDK5 substrate motif;WW domain binding motif	VTEECEEAIPQLVPIGET(1)PDKENVK	137.23	1	0.444455	0.267715	0.355627	0.589529	0.414331	7.99862	137.23	3	968.791	0.26276
Epb4.1l3		S	733	1.33167	E	S	T	S	V	G	S	I	S	P	G	G	A	K	L	E	I	ESSTVRVESTSVGSISPGGAKLEISTKEVPV	A7YY80;D0VYV7;E9PV52;F8WH44;D0VYV6;Q8BT38;A7MCX4;E9QN88	751;687;687;962;786;213;85;733	ERK1,2 kinase substrate motif;G protein-coupled receptor kinase 1 substrate motif;GSK-3, ERK1, ERK2, CDK5 substrate motif;WW domain binding motif	VESTSVGSIS(1)PGGAK	176.69	0.999881	0.493032	0.122606	0.702844	0.33448	0.413241	8.26352	212.72	2	728.34	0.11984
Bin1	Myc box-dependent-interacting protein 1	S	296	1.33129	N	A	P	E	K	G	N	K	S	P	S	P	P	P	D	G	S	VKAQPSDNAPEKGNKSPSPPPDGSPAATPEI	O08539;Q6P1B9	296;265	Casein kinase II substrate motif;ERK1,2 kinase substrate motif;G protein-coupled receptor kinase 1 substrate motif;Growth associated histone HI kinase substrate motif;GSK-3, ERK1, ERK2, CDK5 substrate motif;PKA kinase substrate motif;WW domain binding motif	GNKS(0.996)PS(0.996)PPPDGS(0.008)PAATPEIR	57.936	0.99578	0.335826	0.944484	0.0805913	0.290409	0.412828	8.00979	109.07	3	712.312	0.37047
Frmd6	FERM domain-containing protein 6	S	544	1.32917	T	S	T	D	R	H	S	L	S	L	D	D	I	R	L	Y	Q	TICRKPKTSTDRHSLSLDDIRLYQKDFLRIA	Q8C0V9	544	Casein kinase II substrate motif;Pyruvate dehydrogenase kinase substrate motif	HSLS(1)LDDIR	132.17	0.999991	0.131853	NaN	0.509019	0.590701	0.410524	7.4592	132.17	2	568.261	0.19608
Epb4.1l3		S	451	1.32804	S	K	R	Y	T	M	S	R	S	L	D	G	A	S	V	S	E	PYFERSSSKRYTMSRSLDGASVSENHEIYMK	A7YY80;D0VYV7;E9PV52;Q8BGK4	451;451;451;451	G protein-coupled receptor kinase 1 substrate motif	S(1)LDGASVSENHEIYMK	160.47	1	-0.404496	0.245374	0.838822	0.957496	0.409299	7.77042	160.47	2	938.395	-0.99293
Ctnnd1	Catenin delta-1	S	230	1.32781	P	G	G	S	D	N	Y	G	S	L	S	R	V	T	R	I	E	RHYEDGYPGGSDNYGSLSRVTRIEERYRPSM	E9Q8Z8;E9Q8Z6;E9Q8Z5;P30999;G3X9V2;E9Q904;E9Q901;E9Q903;D3Z2H2;E9Q8Z9;E9Q8Z4;E9Q905;E9Q907;E9Q906;D3Z7H6;E9Q986;Q3TPD1	230;230;230;230;230;176;176;176;176;176;166;129;129;129;129;129;230	Casein kinase II substrate motif	HYEDGYPGGSDNYGS(1)LSR	198.1	0.999701	0.363227	-0.568923	0.90893	0.932967	0.40905	8.44237	257.37	2	1027.4	0.0076025
Sdpr	Serum deprivation-response protein	T	368	1.32554	A	V	G	S	N	A	D	L	T	I	E	E	D	E	E	E	E	ARRGNNSAVGSNADLTIEEDEEEEPVALQQA	Q63918	368	Casein kinase II substrate motif;Plk1 kinase substrate motif	RGNNS(1)AVGS(1)NADLT(1)IEEDEEEEPVALQQAQQVR	108.19	1	0.0387171	0.233643	-0.152638	1.5066	0.40658	9.05896	159.59	4	959.907	0.23834
Tenc1	Tensin-like C1 domain-containing phosphatase	Y	483	1.32464	R	G	P	L	D	G	S	P	Y	A	Q	V	Q	R	V	P	R	DGALAHTRGPLDGSPYAQVQRVPRQTPPAPS	Q8CGB6	483	Csk SH2 domain binding motif;JAK2 kinase substrate motif;Src kinase substrate motif	GPLDGSPY(1)AQVQR	182.71	1	NaN	0.527671	0.387921	0.301195	0.405596	7.61983	188.91	2	734.335	-0.43197
Ptrf	Polymerase I and transcript release factor	T	304	1.32438	R	D	K	L	R	K	S	F	T	P	D	H	V	V	Y	A	R	REKLKTSRDKLRKSFTPDHVVYARSKTAVYK	O54724	304	AMP-activated protein kinase substrate motif;Calmodulin-dependent protein kinase II substrate motif;Chk1 kinase substrate motif;GSK-3, ERK1, ERK2, CDK5 substrate motif;PKA kinase substrate motif;PKC kinase substrate motif;WW domain binding motif	S(0.001)FT(0.999)PDHVVYAR	73.887	0.999457	0.326652	-0.0456399	0.934924	NaN	0.405312	7.91648	83.137	3	457.875	0.53744
Bnip2	BCL2/adenovirus E1B 19 kDa protein-interacting protein 2	S	195	1.32425	T	T	E	V	I	R	K	G	S	I	T	E	Y	T	A	T	E	DDLPKPKTTEVIRKGSITEYTATEEKGDGRR	Q3TWC8;Q3TTX3;G5E8U9;Q9D632;O54940;Q91VL0	195;192;114;114;114;114	14-3-3 domain binding motif;Calmodulin-dependent protein kinase II alpha substrate motif;Calmodulin-dependent protein kinase II substrate motif;Calmodulin-dependent protein kinase IV substrate motif;Casein kinase II substrate motif;Chk1 kinase substrate motif;Phosphorylase kinase substrate motif;PKA kinase substrate motif;PKC epsilon kinase substrate motif;PKC kinase substrate motif	KGS(1)ITEYTATEEK	219.23	0.999996	0.444773	-0.141032	0.620335	0.696634	0.405177	8.40861	241.08	2	768.845	-0.26686
Nedd4l	E3 ubiquitin-protein ligase NEDD4-like;E3 ubiquitin-protein ligase;E3 ubiquitin-protein ligase;E3 ubiquitin-protein ligase	S	477	1.32339	Q	I	R	R	P	R	S	L	S	S	P	T	V	T	L	S	A	NNHLVEPQIRRPRSLSSPTVTLSAPLEGAKD	Q8CFI0;E9PXB7;Q3TQK9;F7AT14;G3X9H8	477;449;369;330;328	14-3-3 domain binding motif;Akt kinase substrate motif;Calmodulin-dependent protein kinase II substrate motif;Casein kinase I substrate motif;Casein kinase II substrate motif;MAPKAPK1 kinase substrate motif;PKA kinase substrate motif;PKC kinase substrate motif	S(0.042)LS(0.953)S(0.004)PTVTLSAPLEGAK	204.63	0.953468	0.447949	-0.496875	0.789038	0.876837	0.404237	7.82901	220.34	2	869.437	-0.37615
Cast	Calpastatin	T	479	1.32124	K	K	S	N	D	T	S	Q	T	P	P	G	E	T	V	P	R	KPSTPAEKKSNDTSQTPPGETVPRASMCSIR	P51125;Q8CE80;Q8CE04;Q8C281;Q8CB83;Q921U7;Q3TTN2	479;445;396;377;377;377;122	GSK-3, ERK1, ERK2, CDK5 substrate motif;WW domain binding motif	SNDTSQT(1)PPGETVPR	258.9	1	0.497842	0.445303	0.550782	0.113645	0.401893	8.67709	258.9	2	833.359	0.12474
Tcf20	Transcription factor 20	S	603	1.32003	N	E	A	P	R	L	S	T	S	P	A	T	R	D	E	A	A	SPTQGAQNEAPRLSTSPATRDEAASPGAKDT	B9EHJ7;Q9EPQ8;E9QKY7;Q80U46	603;603;603;341	Casein kinase I substrate motif;Casein kinase II substrate motif;ERK1,2 kinase substrate motif;GSK-3, ERK1, ERK2, CDK5 substrate motif;WW domain binding motif	LS(0.02)T(0.117)S(0.855)PAT(0.364)RDEAAS(0.644)PGAK	52.823	0.855423	0.192068	1.17907	-0.169412	NaN	0.400574	7.21838	141.36	3	606.927	0.48818
Kif20a	Kinesin-like protein KIF20A	S	7	1.31955	_	_	M	S	H	R	I	L	S	P	P	A	G	L	L	S	D	_________MSHRILSPPAGLLSDEDVVDSP	P97329	7	14-3-3 domain binding motif;Calmodulin-dependent protein kinase II substrate motif;ERK1,2 kinase substrate motif;GSK-3, ERK1, ERK2, CDK5 substrate motif;PKA kinase substrate motif;PKC kinase substrate motif;WW domain binding motif	ILS(1)PPAGLLS(1)DEDVVDS(1)PILESTAADLR	122.73	1	0.408603	0.534361	NaN	0.257166	0.400043	6.65296	133.57	3	1045.14	0.11184
Kif20a	Kinesin-like protein KIF20A	S	14	1.31955	L	S	P	P	A	G	L	L	S	D	E	D	V	V	D	S	P	__MSHRILSPPAGLLSDEDVVDSPILESTAA	P97329	14	Casein kinase II substrate motif;Pyruvate dehydrogenase kinase substrate motif	ILS(1)PPAGLLS(1)DEDVVDS(1)PILESTAADLR	122.73	1	0.408603	0.534361	NaN	0.257166	0.400043	6.65296	133.57	3	1045.14	0.11184
Kif20a	Kinesin-like protein KIF20A	S	21	1.31955	L	S	D	E	D	V	V	D	S	P	I	L	E	S	T	A	A	LSPPAGLLSDEDVVDSPILESTAADLRSVVR	P97329	21	b-Adrenergic Receptor kinase substrate motif;ERK1,2 kinase substrate motif;GSK-3, ERK1, ERK2, CDK5 substrate motif;WW domain binding motif	ILS(1)PPAGLLS(1)DEDVVDS(1)PILESTAADLR	122.73	0.999965	0.408603	0.534361	NaN	0.257166	0.400043	6.65296	133.57	3	1045.14	0.11184
Tnks1bp1	182 kDa tankyrase-1-binding protein	S	429	1.31744	S	S	L	A	Q	R	R	F	S	E	G	V	L	Q	P	P	S	GHTESRPSSLAQRRFSEGVLQPPSQDQEKLG	B9EKJ7;P58871	429;429	14-3-3 domain binding motif;Calmodulin-dependent protein kinase II substrate motif;G protein-coupled receptor kinase 1 substrate motif;PAK2 kinase substrate motif;PKA kinase substrate motif;PKC epsilon kinase substrate motif;PKC kinase substrate motif	RFS(1)EGVLQPPSQDQEK	135.98	1	0.459851	0.140909	0.438601	0.551606	0.397742	7.61007	159.69	2	962.944	0.20415
Srsf11		S	484	1.31572	V	S	P	K	T	K	E	C	S	V	E	K	G	V	G	D	L	EKRPTEAVSPKTKECSVEKGVGDLRESKVNG	E9Q6E5;Q3UIX4;Q8BV04;B7ZNC5;Q3URV9;F6XR65;Q3UUW4	484;449;396;349;199;197;186	Casein kinase II substrate motif;Phosphorylase kinase substrate motif;PKA kinase substrate motif;PKC kinase substrate motif	T(0.014)KECS(0.986)VEKGVGDLR	62.287	0.985991	0.798507	0.0712136	0.364273	0.349438	0.395858	7.43295	86.291	3	553.259	-0.22509
Ahnak		S	5377	1.315	E	W	K	G	P	Q	V	S	S	S	L	N	L	D	T	S	K	SVKGSGVEWKGPQVSSSLNLDTSKLAGNLHF	E9Q616;Q8VDN3;A0PJF4;E9Q1H8;Q6UIL4;Q8BKS2;Q8CGE7	5377;745;1456;460;398;838;386	MDC1 BRCT domain binding motif;Plk1 PBD domain binding motif	GPQVSS(0.65)S(0.35)LNLDTSK	170.61	0.649899	-1.00468	NaN	0.867463	1.3224	0.395059	7.02436	170.61	2	756.851	0.14787
Cald1		S	258	1.31449	E	N	A	F	S	P	S	R	S	G	G	R	A	S	G	D	K	THKLKQTENAFSPSRSGGRASGDKEAEGAPQ	E9QA16;Q8VCQ8;E9QA15;D3Z6I7;E9Q0M9;Q3UGC3;F6QLP8;F6T2Z7;F7CVG0;Q8VD79;F6ZAW1;F6RGN9	258;252;490;276;256;109;138;301;300;300;128;84	G protein-coupled receptor kinase 1 substrate motif;MAPKAPK2 kinase substrate motif	S(0.898)GGRAS(0.102)GDKEAEGAPQVEAGK	91.416	0.897917	0.41684	0.173895	NaN	0.592789	0.394508	7.59637	149.62	3	694.315	0.18678
Hnrnpa1	Heterogeneous nuclear ribonucleoprotein A1	S	2	1.31373	_	_	_	_	_	_	_	M	S	K	S	E	S	P	K	E	P	______________MSKSESPKEPEQLRKLF	P49312;Q3TFB1;Q3TIK8;Q3U7F3;Q5EBP8;Q3UK83	2;2;2;2;2;2	Casein kinase II substrate motif;G protein-coupled receptor kinase 1 substrate motif;GSK3 kinase substrate motif	S(0.993)KS(0.487)ES(0.52)PKEPEQLR	114.59	0.993262	0.528571	0.25544	0.572222	0.218447	0.39367	7.82865	149.36	2	858.866	0.10062
Ubr5	E3 ubiquitin-protein ligase UBR5	S	1549	1.31325	R	N	P	Q	Q	R	R	I	S	Q	S	Q	P	V	R	G	R	SQSSYIIRNPQQRRISQSQPVRGRDEEQDDI	E9Q2H1;Q80TP3	1549;1543	14-3-3 domain binding motif;ATM kinase substrate motif;Calmodulin-dependent protein kinase II substrate motif;Casein kinase II substrate motif;DNA dependent Protein kinase substrate motif;G protein-coupled receptor kinase 1 substrate motif;PAK2 kinase substrate motif;PKA kinase substrate motif;PKC epsilon kinase substrate motif;PKC kinase substrate motif	RIS(1)QSQPVR	198.32	0.999987	NaN	0.323889	0.371665	0.483884	0.393146	7.28903	198.32	2	575.79	-0.70882
Sdpr	Serum deprivation-response protein	S	218	1.31094	R	D	E	E	A	L	E	D	S	A	E	E	K	M	E	E	S	SSDDELPRDEEALEDSAEEKMEESRAEKIKR	Q63918	218	b-Adrenergic Receptor kinase substrate motif;Casein kinase II substrate motif	S(0.007)LEET(0.007)LHNVDLS(0.997)S(0.989)DDELPRDEEALEDS(1)AEEK	104.89	1	0.0391384	0.131985	0.710095	0.681168	0.390596	8.91327	194.23	4	939.376	0.49732
Srrm2	Serine/arginine repetitive matrix protein 2	S	1339	1.31077	Q	S	R	S	S	R	R	S	S	S	E	L	S	P	E	V	V	PSVDMKEQSRSSRRSSSELSPEVVEKVGLFS	Q8BTI8	1339	14-3-3 domain binding motif;Calmodulin-dependent protein kinase II substrate motif;Casein kinase II substrate motif;G protein-coupled receptor kinase 1 substrate motif;GSK3 kinase substrate motif;MAPKAPK2 kinase substrate motif;MDC1 BRCT domain binding motif;PAK2 kinase substrate motif;PKA kinase substrate motif;PKC epsilon kinase substrate motif;PKC kinase substrate motif;Plk1 PBD domain binding…	RS(0.001)S(0.998)S(0.002)ELS(1)PEVVEK	220.28	0.997913	0.227371	0.286408	0.502526	0.545361	0.390416	8.82736	226.72	2	803.842	-0.0080379
Vim	Vimentin	S	39	1.30856	V	T	T	S	T	R	T	Y	S	L	G	S	A	L	R	P	S	PSSNRSYVTTSTRTYSLGSALRPSTSRSLYS	P20152;Q3U6S1;Q3UAX1;Q5FWJ3;E9PZV5;Q3TFD9;Q3V2S4;Q3TWV0;A4IF59;A2AKJ2	39;39;39;39;26;39;39;39;39;39	14-3-3 domain binding motif;Calmodulin-dependent protein kinase II substrate motif;Casein kinase I substrate motif;Casein kinase II substrate motif;G protein-coupled receptor kinase 1 substrate motif;Phosphorylase kinase substrate motif;PKA kinase substrate motif;PKC kinase substrate motif	TYS(0.999)LGS(0.001)ALRPSTSR	131.96	0.999292	0.0851526	0.0211954	0.847933	0.597627	0.387977	8.40035	135.23	2	788.38	-0.34766
Hexim1	Protein HEXIM1	S	103	1.30736	E	D	L	S	T	G	G	A	S	P	S	A	E	G	E	P	M	GEKGQNGEDLSTGGASPSAEGEPMSESLVQP	Q8R409	103	Casein kinase II substrate motif;ERK1,2 kinase substrate motif;GSK-3, ERK1, ERK2, CDK5 substrate motif;WW domain binding motif	GQNGEDLS(0.001)T(0.034)GGAS(0.912)PS(0.053)AEGEPMSESLVQPGHDSEATK	115.72	0.912349	-0.230008	0.145612	0.264876	1.36613	0.386653	7.96146	115.72	3	1212.85	-0.48901
Matr3	Matrin-3	S	201	1.306	D	S	F	D	D	R	G	P	S	L	N	P	V	L	D	Y	D	EKRHFRRDSFDDRGPSLNPVLDYDHGSRSQE	Q6ZQ61;Q3TTX0;Q4FJT0;Q5BL18;Q8K310;Q9R0U5	201;195;195;195;195;195	14-3-3 domain binding motif;Calmodulin-dependent protein kinase II substrate motif;DNA dependent Protein kinase substrate motif;MAPKAPK2 kinase substrate motif;Phosphorylase kinase substrate motif;PKA kinase substrate motif;PKC kinase substrate motif	RDS(0.005)FDDRGPS(0.995)LNPVLDYDHGSR	102.07	0.994585	0.30147	0.281431	NaN	0.572565	0.385156	8.65224	134.28	3	866.717	0.44445
Phldb1	Pleckstrin homology-like domain family B member 1	S	445	1.30587	T	R	T	L	Q	P	P	E	S	P	R	L	G	R	R	G	L	FSDGLAATRTLQPPESPRLGRRGLDSMRELP	D3Z0X5;D3Z4N0;Q6PDH0;E9PWB1;F6RUK9	445;445;445;445;190	b-Adrenergic Receptor kinase substrate motif;ERK1,2 kinase substrate motif;Growth associated histone HI kinase substrate motif;GSK-3, ERK1, ERK2, CDK5 substrate motif;PKA kinase substrate motif;PKC kinase substrate motif;WW domain binding motif	TLQPPES(1)PR	93.623	1	0.416624	NaN	0.216652	0.521763	0.385013	7.26862	93.623	2	552.758	-0.40981
Ankrd17	Ankyrin repeat domain-containing protein 17;Mucin-20	S	1705	1.30161	P	N	G	K	L	T	V	A	S	P	K	R	G	P	K	R	E	GPSPLSSPNGKLTVASPKRGPKREEGWKEVV	Q99NH0;E9QKG6;E9PUF1;Q8BUE7	1705;1454;618;618	Cdc2 kinase substrate motif;CDK kinase substrate motif;CDK1,2,4,6 kinase substrate motif;ERK1,2 kinase substrate motif;Growth associated histone HI kinase substrate motif;GSK-3, ERK1, ERK2, CDK5 substrate motif;PKA kinase substrate motif;PKC kinase substrate motif;WW domain binding motif	LTVAS(1)PK	89.047	1	2.61918	-0.345931	-0.179638	-0.572405	0.380301	7.59882	96.143	2	398.204	-0.0066405
Eml3	Echinoderm microtubule-associated protein-like 3	S	177	1.29705	Q	K	L	S	R	K	A	A	S	S	A	N	L	L	L	R	S	SPSERPRQKLSRKAASSANLLLRSGSTESRG	Q8VC03	177	PKA kinase substrate motif;PKC kinase substrate motif	KAAS(0.989)S(0.011)ANLLLR	99.069	0.989476	0.512783	-0.0463399	0.543551	0.490943	0.375234	7.61697	138.02	2	612.329	-0.10839
Ttc15	Trafficking protein particle complex subunit 12	S	309	1.29671	L	T	A	P	V	G	E	K	S	P	D	S	T	S	P	S	Y	VPEKLSSLTAPVGEKSPDSTSPSYSTRMDRS	Q3UGE1;Q8K2L8;Q8C0C3;Q8BUB5;Q3TB00	309;309;309;309;309	Casein kinase I substrate motif;Casein kinase II substrate motif;ERK1,2 kinase substrate motif;G protein-coupled receptor kinase 1 substrate motif;Growth associated histone HI kinase substrate motif;GSK-3, ERK1, ERK2, CDK5 substrate motif;WW domain binding motif	LSSLTAPVGEKS(0.988)PDS(0.003)T(0.003)S(0.003)PS(0.001)YS(0.001)T(0.001)R	83.423	0.988006	0.457962	0.521855	0.361342	0.158284	0.374861	7.62929	102.39	3	816.383	-0.10436
Ndrg1	Protein NDRG1	S	330	1.29638	R	L	M	R	S	R	T	A	S	G	S	S	V	T	S	L	E	MPSASMTRLMRSRTASGSSVTSLEGTRSRSH	B7ZWC0;Q3TD08;Q545R3;Q62433;Q3TSR4	330;330;330;330;330	14-3-3 domain binding motif;Akt kinase substrate motif;Calmodulin-dependent protein kinase II substrate motif;Casein kinase I substrate motif;Casein kinase II substrate motif;MAPKAPK1 kinase substrate motif;MAPKAPK2 kinase substrate motif;PKA kinase substrate motif;PKC kinase substrate motif	SRT(1)AS(0.999)GSSVTSLEGTR	166.65	0.999345	0.672742	-0.229974	0.588791	0.466377	0.374484	8.51505	198.22	2	878.369	-0.73746
Ahnak		S	2566	1.29379	M	N	I	K	A	P	K	I	S	M	P	D	I	D	L	N	L	PKFKMPEMNIKAPKISMPDIDLNLKGPKVKG	E9Q616;F7BRM2;Q6UL10;A0PJF4;A0JLR7	2566;1501;1503;579;170	Casein kinase II substrate motif;PKA kinase substrate motif;PKC kinase substrate motif;Pyruvate dehydrogenase kinase substrate motif	IS(1)MPDIDLNLKGPK	124.43	1	0.49774	-0.227793	0.844873	NaN	0.371606	7.4371	124.43	2	810.907	-0.73826
Pdlim2	PDZ and LIM domain protein 2	S	199	1.29182	S	A	V	R	V	L	L	H	S	P	G	R	P	S	S	P	R	GHSSPSDSAVRVLLHSPGRPSSPRFSSLDLE	Q8R1G6;E9Q996	199;199	Cdc2 kinase substrate motif;CDK kinase substrate motif;CDK1,2,4,6 kinase substrate motif;ERK1,2 kinase substrate motif;G protein-coupled receptor kinase 1 substrate motif;GSK-3, ERK1, ERK2, CDK5 substrate motif;WW domain binding motif	VLLHS(1)PGRPS(0.949)S(0.051)PR	124.84	0.999999	0.00432164	0.397913	0.543404	0.53199	0.369407	8.50248	124.84	2	781.866	0.058662
Ahnak		T	5567	1.29142	E	R	E	F	S	A	P	S	T	P	T	G	T	L	E	F	A	RSNSFSDEREFSAPSTPTGTLEFAGGDAKGK	E9Q616;Q8VDN3;E9Q1H8;Q6UIL4;Q8CGE7	5567;935;648;588;576	Casein kinase I substrate motif;ERK1,2 kinase substrate motif;G protein-coupled receptor kinase 1 substrate motif;GSK3, Erk1, Erk2 and CDK5 kinase motif;GSK-3, ERK1, ERK2, CDK5 substrate motif;MAPKAPK2 kinase substrate motif;MDC1 BRCT domain binding motif;Plk1 PBD domain binding motif;WW domain binding motif	S(0.652)NS(0.275)FS(0.19)DEREFS(0.871)APS(0.024)T(0.988)PTGTLEFAGGDAK	114.61	0.987918	0.631337	0.0628125	0.782571	-0.000865332	0.368964	8.41872	188.24	3	1049.08	0.51483
Lmna	Prelamin-A/C;Lamin-A/C	S	17	1.29052	A	T	R	S	G	A	Q	A	S	S	T	P	L	S	P	T	R	ETPSQRRATRSGAQASSTPLSPTRITRLQEK	B3RH23;P48678;Q3U733;B3RH24;Q3U7I5;Q3UCU3;D3YUF7	17;17;85;17;17;17;17	Casein kinase II substrate motif	SGAQAS(0.955)S(0.044)TPLSPTR	165.66	0.955497	0.316725	-0.189927	0.669694	0.675304	0.367949	8.12885	165.66	2	720.33	0.99422
Dock7	Dedicator of cytokinesis protein 7	S	452	1.28926	R	R	S	L	E	R	T	T	S	G	D	D	A	C	N	L	T	RNSSLVGRRSLERTTSGDDACNLTSFRPATL	Q8R1A4;A2A9M5;E9PX48	452;452;452	14-3-3 domain binding motif;Calmodulin-dependent protein kinase II substrate motif;Calmodulin-dependent protein kinase IV substrate motif;Casein kinase II substrate motif;Chk1 kinase substrate motif;G protein-coupled receptor kinase 1 substrate motif;PKA kinase substrate motif;PKC kinase substrate motif;Pyruvate dehydrogenase kinase substrate motif	T(0.037)T(0.168)S(0.794)GDDACNLTSFRPATLTVANFFK	90.907	0.794305	NaN	0.339821	0.209261	0.55055	0.366544	7.61478	95.414	3	938.765	-0.49243
Ahnak		S	116	1.28295	S	R	S	S	E	V	V	L	S	G	D	D	E	D	Y	Q	R	WTHEVFSSRSSEVVLSGDDEDYQRIYTTKIK	E9Q616;Q8BRB8	116;116	Casein kinase II substrate motif;Pyruvate dehydrogenase kinase substrate motif	SSEVVLS(1)GDDEDYQR	249.47	1	0.15549	0.330329	0.373757	0.578262	0.35946	9.27007	262.25	2	889.859	0.20304
Sdpr	Serum deprivation-response protein	S	359	1.2819	K	S	A	R	R	G	N	N	S	A	V	G	S	N	A	D	L	GSAEDAEKSARRGNNSAVGSNADLTIEEDEE	Q63918	359	G protein-coupled receptor kinase 1 substrate motif;GSK3 kinase substrate motif	RGNNS(1)AVGS(1)NADLT(1)IEEDEEEEPVALQQAQQVR	108.19	1	-0.392232	-0.636593	1.23206	1.22989	0.35828	9.31794	166.22	4	959.907	0.23834
Dennd4c		S	720	1.27923	R	L	D	L	K	L	F	D	S	P	Q	K	L	K	L	C	F	YSYTYFPRLDLKLFDSPQKLKLCFNRHPPGS	A2AJX5;A6H8H2;E9Q449;Q3U2K9	720;720;720;720	AMP-activated protein kinase substrate motif;b-Adrenergic Receptor kinase substrate motif;Cdc2 kinase substrate motif;CDK kinase substrate motif;CDK1,2,4,6 kinase substrate motif;ERK1,2 kinase substrate motif;GSK-3, ERK1, ERK2, CDK5 substrate motif;PKA kinase substrate motif;WW domain binding motif	LFDS(1)PQKLK	75.739	1	NaN	-0.0277485	0.438229	0.655331	0.35527	7.51089	120.57	2	578.294	0.13335
Nsfl1c	NSFL1 cofactor p47	S	116	1.2786	I	V	G	P	P	R	K	K	S	P	N	E	L	V	D	D	L	SERSGQQIVGPPRKKSPNELVDDLFKGAKEH	Q3UVN5;Q9CZ44;Q3KQQ1;A2AT02	116;114;113;114	14-3-3 domain binding motif;Calmodulin-dependent protein kinase II substrate motif;Casein kinase II substrate motif;ERK1,2 kinase substrate motif;Growth associated histone HI kinase substrate motif;GSK-3, ERK1, ERK2, CDK5 substrate motif;PKA kinase substrate motif;PKC epsilon kinase substrate motif;PKC kinase substrate motif;WW domain binding motif	KS(1)PNELVDDLFK	175.8	1	0.513086	0.475293	0.242482	0.187411	0.354568	8.90829	194.94	2	742.855	0.019554
Thrap3	Thyroid hormone receptor-associated protein 3	S	924	1.27815	P	K	W	A	H	D	K	F	S	G	E	E	G	E	I	E	D	FRKSSTSPKWAHDKFSGEEGEIEDDESGTEN	A2AJI4;Q569Z6;Q3U503;Q80VM0	924;924;243;34	Casein kinase I substrate motif;Casein kinase II substrate motif;PKA kinase substrate motif;PKC kinase substrate motif	WAHDKFS(1)GEEGEIEDDES(0.807)GT(0.193)ENREEK	104.07	1	0.385155	0.78073	0.159492	0.0908643	0.35406	9.19056	191.09	3	1061.74	0.14808
Pum1	Pumilio homolog 1	S	710	1.27765	T	G	S	G	S	R	R	D	S	L	T	G	S	S	D	L	Y	TAVANSNTGSGSRRDSLTGSSDLYKRTSSSL	B1ASF2;Q3UR00;Q80U78;Q3TQ21;B1ASF3;Q3U4T5;Q3TTW5;E9Q6M7;Q3UHW0	710;710;710;709;709;615;613;467;467	14-3-3 domain binding motif;Aurora-A kinase substrate motif;b-Adrenergic Receptor kinase substrate motif;Calmodulin-dependent protein kinase II substrate motif;Casein kinase II substrate motif;G protein-coupled receptor kinase 1 substrate motif;GSK3 kinase substrate motif;MAPKAPK2 kinase substrate motif;PAK2 kinase substrate motif;Phosphorylase kinase substrate motif;PKA kinase substrate motif;PK…	RDS(1)LTGSSDLYK	136.63	0.999694	0.315914	-0.438131	0.90809	0.628096	0.353492	8.35149	156	2	711.319	0.1725
Tnks1bp1	182 kDa tankyrase-1-binding protein	S	1657	1.27665	A	K	L	R	S	R	N	R	S	A	E	E	G	E	V	T	E	LSPSALKAKLRSRNRSAEEGEVTESKSSQKE	B9EKJ7;P58871	1657;1657	14-3-3 domain binding motif;Akt kinase substrate motif;Calmodulin-dependent protein kinase II substrate motif;Casein kinase II substrate motif;MAPKAPK1 kinase substrate motif;MAPKAPK2 kinase substrate motif;PKA kinase substrate motif;PKC kinase substrate motif	NRS(1)AEEGEVTESK	154.07	1	0.293724	0.434988	0.279091	0.401635	0.35236	8.38753	252.38	3	505.882	-0.1404
Nck1	Cytoplasmic protein NCK1	S	85	1.27589	I	G	K	V	K	R	K	P	S	V	P	D	T	A	S	P	A	NLKDTLGIGKVKRKPSVPDTASPADDSFVDP	Q99M51;Q8BH99	85;21	14-3-3 domain binding motif;Calmodulin-dependent protein kinase II alpha substrate motif;Calmodulin-dependent protein kinase II substrate motif;Calmodulin-dependent protein kinase IV substrate motif;Casein kinase II substrate motif;Chk1 kinase substrate motif;DNA dependent Protein kinase substrate motif;G protein-coupled receptor kinase 1 substrate motif;Phosphorylase kinase substrate motif;Pim1 …	RKPS(1)VPDTASPADDSFVDPGER	148.2	0.999734	0.0659858	-0.0502335	0.650907	0.739372	0.351508	8.02723	148.2	3	808.367	-0.072809
Tcf20	Transcription factor 20	S	587	1.27584	C	G	A	S	E	K	A	G	S	S	P	T	Q	G	A	Q	N	SSDTTYKCGASEKAGSSPTQGAQNEAPRLST	B9EHJ7;Q9EPQ8;E9QKY7;Q80U46	587;587;587;325	Casein kinase I substrate motif;Casein kinase II substrate motif;PKA kinase substrate motif;PKC kinase substrate motif	AGS(0.589)S(0.411)PTQGAQNEAPR	163.56	0.589354	0.118493	0.0540844	0.0580373	1.17518	0.351447	7.79562	163.56	2	775.833	-0.38758
Sh3pxd2a	SH3 and PX domain-containing protein 2A	S	993	1.27524	S	C	A	L	R	R	N	E	S	L	T	A	T	D	S	L	R	PPKDNNLSCALRRNESLTATDSLRGVRRNSS	O89032	993	14-3-3 domain binding motif;b-Adrenergic Receptor kinase substrate motif;Calmodulin-dependent protein kinase II alpha substrate motif;Calmodulin-dependent protein kinase II substrate motif;Calmodulin-dependent protein kinase IV substrate motif;Casein kinase II substrate motif;Chk1 kinase substrate motif;Doublecortin kinase-1 kinase substrate motif;G protein-coupled receptor kinase 1 substrate mot…	RNES(0.999)LTATDSLR	67.416	0.999214	0.262914	-0.0907415	0.40152	0.829383	0.350769	7.65595	107.51	2	721.835	0.21067
Ptpn21	Tyrosine-protein phosphatase non-receptor type 21	S	538	1.27482	R	R	P	V	V	G	A	V	S	V	P	E	L	T	N	V	Q	PYPYPAERRPVVGAVSVPELTNVQLQAQDYP	G5E8J4;Q4KML9;Q62136;Q05DI4;Q7TMG1	538;538;538;538;120	Casein kinase II substrate motif	RPVVGAVS(0.997)VPELT(0.003)NVQLQAQDYPAPNIMR	94.594	0.997457	0.0257376	-0.0765237	0.802588	0.649367	0.350292	7.98926	121.58	3	1086.88	-0.68839
Plec	Plectin	S	4241	1.27443	S	G	N	A	G	G	F	R	S	R	S	S	S	V	G	S	S	TEFADMLSGNAGGFRSRSSSVGSSSSYPISS	E9QMZ5;E9QN87;Q9QXS1;E9QPE8;E9QK43;E9QQ00;Q6S385;E9QL05;E9PY96;Q6S387;E9QLJ5;Q6S393;E9QKX4;Q6S392;E9Q153;Q6S388;E9QK01;Q6S390;E9Q3W4	4241;4389;4389;4384;4287;4248;4248;4246;4241;4241;4232;4232;4219;4219;4209;4209;4147;4147;4084	Casein kinase I substrate motif;Casein kinase II substrate motif;G protein-coupled receptor kinase 1 substrate motif;GSK3 kinase substrate motif	AGTLSITEFADMLSGNAGGFRS(1)R	165.66	1	0.27858	0.0626743	0.400911	0.657241	0.349851	9.08357	182.4	3	818.709	0.00066474
Smn1	Survival motor neuron protein	S	28	1.27269	R	G	T	G	Q	S	D	D	S	D	I	W	D	D	T	A	L	EDTVLFRRGTGQSDDSDIWDDTALIKAYDKA	P97801;Q3UMN7;Q549F9;Q5PXT3	28;28;28;28	b-Adrenergic Receptor kinase substrate motif	RGTGQS(1)DDS(1)DIWDDTALIK	174.86	1	0.192194	0.370722	0.390453	0.438151	0.34788	7.7295	174.86	2	1126.96	0.55973
Gas7		S	60	1.27252	R	P	S	S	S	P	G	I	S	A	S	P	G	P	H	R	S	TNETTWERPSSSPGISASPGPHRSSLPTTVN	Q0VBR8;Q3U432;B1ATI9	60;55;51	Casein kinase II substrate motif;MAPKAPK2 kinase substrate motif	YYVNTTTNETTWERPS(0.01)S(0.01)S(0.046)PGIS(0.777)AS(0.157)PGPHR	88.504	0.776535	0.36793	0.774081	NaN	-0.0989585	0.347684	7.56926	93.397	3	1091.49	0.24043
Nucks1	Nuclear ubiquitous casein and cyclin-dependent kinase substrate 1	S	75	1.27168	K	T	K	K	D	D	S	H	S	A	E	D	S	E	D	E	K	DSEEKDVKTKKDDSHSAEDSEDEKDDHKNVR	Q80XU3	75	Casein kinase I substrate motif;Casein kinase II substrate motif;G protein-coupled receptor kinase 1 substrate motif;GSK3 kinase substrate motif;Pyruvate dehydrogenase kinase substrate motif	DDS(1)HS(1)AEDS(1)EDEKDDHKNVR	109.44	1	0.391328	0.296311	0.324401	0.374898	0.346734	8.49485	180.84	3	856.625	0.20791
Dclk1	Serine/threonine-protein kinase DCLK1	T	34	1.27116	R	V	N	G	L	P	S	P	T	H	S	A	H	C	S	F	Y	QRYSRGSRVNGLPSPTHSAHCSFYRTRTLQT	Q8CHG1;Q9JLM8;A3KN70;Q9JLM7;Q8BRN4;Q3UGP0;Q80VB6;Q8VDT3	86;34;34;34;34;34;34;34	DNA dependent Protein kinase substrate motif	VNGLPS(0.943)PT(0.974)HS(0.046)AHCS(0.019)FY(0.018)R	60.918	0.973569	0.106616	NaN	0.522033	0.409796	0.346148	7.34624	62.68	3	697.283	-0.33882
Add3	Gamma-adducin;Beta-adducin;Alpha-adducin	S	724	1.26891	K	K	K	K	F	R	T	P	S	F	L	K	K	S	K	K	K	PGKSPSKKKKKFRTPSFLKKSKKKSDS____;PSKSPSKKKKKFRTPSFLKKNKKKEKVEA__	Q9QYB5;Q3UNK1;Q8BJH2;Q05DT0;Q9JLE2;Q9QYB8;Q9QYC0;Q8K232	693;661;661;661;262;712;724;724	14-3-3 domain binding motif;14-3-3 domain binding motif;Akt kinase substrate motif;Akt kinase substrate motif;AMP-activated protein kinase 2 substrate motif;AMP-activated protein kinase 2 substrate motif;Calmodulin-dependent protein kinase II substrate motif;Calmodulin-dependent protein kinase II substrate motif;DNA dependent Protein kinase substrate motif;DNA dependent Protein kinase substrate m…	TPS(1)FLKK	140.45	1	0.819913	-0.174003	0.381855	0.346591	0.343589	8.62982	140.45	2	450.733	0.14667
Srrm2	Serine/arginine repetitive matrix protein 2	S	323	1.26669	A	T	N	I	Q	Q	P	S	S	P	A	P	S	T	K	Q	S	APSVEPGATNIQQPSSPAPSTKQSSSPYEDK	Q8BTI8	323	Casein kinase I substrate motif;ERK1,2 kinase substrate motif;G protein-coupled receptor kinase 1 substrate motif;GSK3 kinase substrate motif;GSK-3, ERK1, ERK2, CDK5 substrate motif;MDC1 BRCT domain binding motif;Plk1 PBD domain binding motif;WW domain binding motif	IHT(0.095)T(0.098)ALT(0.145)GQS(0.608)PPLAS(0.02)GHQGEGDAPS(0.039)VEPGAT(0.093)NIQQPS(0.075)S(0.748)PAPS(0.041)T(0.038)K	60.1	0.747771	0.171847	0.355129	0.496204	NaN	0.34106	8.41384	77.308	3	1493.69	-0.21948
Crtc3	CREB-regulated transcription coactivator 3	T	56	1.26539	Q	K	L	Q	Q	L	R	L	T	Q	Y	H	G	G	S	L	P	TLSRVQFQKLQQLRLTQYHGGSLPNVSQLRN	Q91X84	56	Dual specificity protein phosphatase 6 substrate motif;PKA kinase substrate motif;PKC kinase substrate motif;PP2C delta substrate motif	LT(0.813)QY(0.002)HGGS(0.185)LPNVSQLR	89.859	0.812894	0.36087	NaN	0.557455	0.100422	0.339582	7.16826	89.859	3	617.303	-0.32269
Klhl22	Kelch-like protein 22	T	605	1.26466	L	L	H	E	Q	P	R	G	T	P	N	R	S	Q	A	D	A	VLTLPRSLLHEQPRGTPNRSQADADFASEVM	F8WIU0;H9KV05;Q99JN2	605;605;605	Cdc2 kinase substrate motif;CDK1,2,4,6 kinase substrate motif;G protein-coupled receptor kinase 1 substrate motif;GSK-3, ERK1, ERK2, CDK5 substrate motif;PKA kinase substrate motif;PKC kinase substrate motif;WW domain binding motif	SLLHEQPRGT(1)PNR	101.89	1	0.588421	NaN	0.538052	-0.110229	0.338748	7.50466	101.89	3	528.926	0.72166
Plec	Plectin	S	4472	1.26237	A	Q	S	S	K	G	Y	Y	S	P	Y	S	V	S	G	S	G	LRLLEAAAQSSKGYYSPYSVSGSGSTAGSRT	E9QMZ5;E9QN87;Q9QXS1;E9QPE8;E9QK43;E9QQ00;Q6S385;E9QL05;E9PY96;Q6S387;E9QLJ5;Q6S393;E9QKX4;Q6S392;E9Q153;Q6S388;E9QK01;Q6S390;E9Q3W4	4472;4620;4620;4615;4518;4479;4479;4477;4472;4472;4463;4463;4450;4450;4440;4440;4378;4378;4315	Casein kinase I substrate motif;Casein kinase II substrate motif;ERK1,2 kinase substrate motif;GSK-3, ERK1, ERK2, CDK5 substrate motif;PKA kinase substrate motif;WW domain binding motif	GYYS(1)PYSVSGSGSTAGSR	225.5	1	0.474877	0.642101	0.0045807	0.222969	0.336132	8.94186	245.82	2	931.883	0.79434
Gas2l1	GAS2-like protein 1	S	316	1.26126	V	P	G	S	E	R	R	S	S	R	P	E	V	T	P	I	S	SPRPGSPVPGSERRSSRPEVTPISLRGTKEG	Q8JZP9;Q9D2H3	316;316	14-3-3 domain binding motif;Calmodulin-dependent protein kinase II substrate motif;Casein kinase II substrate motif;MDC1 BRCT domain binding motif;PAK2 kinase substrate motif;PKA kinase substrate motif;PKC epsilon kinase substrate motif;PKC kinase substrate motif;Plk1 PBD domain binding motif	RS(0.037)S(0.96)RPEVT(0.003)PISLR	83.53	0.959809	0.49334	-0.254479	0.765719	NaN	0.33486	7.33949	83.53	3	526.61	-0.13385
Epb4.1l2	Band 4.1-like protein 2	S	86	1.26016	P	P	W	L	K	K	Q	R	S	Y	N	L	V	V	A	K	D	RGISRFIPPWLKKQRSYNLVVAKDGGDKKEP	Q80UE5;B6ZHC5;Q80UE4;B6ZHC7;B6ZHD0;G3X9B8;Q3UNQ6;Q80UE3;O70318;G3X991;Q8C928;B6ZHC6;Q811B2;Q8CGJ6	86;86;86;86;86;86;86;86;86;86;78;86;86;86	AMP-activated protein kinase substrate motif;Calmodulin-dependent protein kinase II substrate motif;Chk1 kinase substrate motif;PKA kinase substrate motif;PKC kinase substrate motif	S(1)YNLVVAK	132.32	0.999985	0.490262	-0.110075	0.620623	NaN	0.333603	7.12281	132.32	2	487.241	0.44901
Pa2g4	Proliferation-associated protein 2G4	S	2	1.2598	_	_	_	_	_	_	_	M	S	G	E	D	E	Q	Q	E	Q	______________MSGEDEQQEQTIAEDLV	P50580;Q3TGU7;Q3UMW2;Q05BN2;D3YVH7	2;2;2;2;2	Casein kinase II substrate motif;Pyruvate dehydrogenase kinase substrate motif	S(1)GEDEQQEQTIAEDLVVTK	255.99	1	0.323197	0.234379	0.421032	0.354169	0.333194	8.96833	281.42	2	1120.99	-0.093986
Csrnp2	Cysteine/serine-rich nuclear protein 2	S	280	1.25894	T	I	M	K	L	E	L	E	S	K	R	Q	V	S	R	P	A	VRTHYLHTIMKLELESKRQVSRPAAEEEPLP	Q8BGQ2	280	b-Adrenergic Receptor kinase substrate motif;Casein kinase I substrate motif;PKA kinase substrate motif;PKC kinase substrate motif	T(0.268)HY(0.464)LHT(0.268)IMKLELES(1)K	120.63	1	-4.31856	-3.5574	4.44156	4.76321	0.332205	7.88482	120.63	2	1009.96	-0.072987
Ablim1	Actin-binding LIM protein 1	S	738	1.25811	H	A	P	S	S	K	T	S	S	L	P	G	Y	G	K	N	G	SPLHSASHAPSSKTSSLPGYGKNGLHRPVST	E9QK41;Q8K4G5;E9Q9C2;E9Q9C1;B9EIV0;E9Q9C9;E9Q9C0;E9Q9C8;E9Q9C4;E9Q1E8;E9Q9C7;Q3UP03;E9Q030;E9Q9D2;E9Q9D1;E9Q9Q7;Q8K278	738;738;654;621;607;607;591;578;559;545;545;545;422;331;303;277;174	MAPKAPK2 kinase substrate motif;MDC1 BRCT domain binding motif;Phosphorylase kinase substrate motif;PKA kinase substrate motif;PKC kinase substrate motif;Plk1 PBD domain binding motif	TSS(1)LPGYGK	113.47	0.999964	0.285106	0.465609	0.31865	0.255684	0.331262	7.54642	120.06	2	495.221	-0.11023
Nup155	Nuclear pore complex protein Nup155	S	1024	1.25636	N	Q	S	K	A	A	P	Q	S	P	S	V	P	K	K	P	G	DTLQELVNQSKAAPQSPSVPKKPGPPVLSSD	Q6ZQ45;Q80X48;Q99P88;Q3UL43	1024;992;992;992	Casein kinase II substrate motif;ERK1,2 kinase substrate motif;G protein-coupled receptor kinase 1 substrate motif;GSK-3, ERK1, ERK2, CDK5 substrate motif;WW domain binding motif	AAPQS(0.853)PS(0.147)VPK	83.862	0.852932	0.675274	-0.776034	1.06022	0.357548	0.329251	7.66858	83.862	2	531.255	0.20195
Nfic	Nuclear factor 1 C-type;Nuclear factor 1	T	328	1.25525	G	I	S	S	P	V	K	K	T	E	M	D	K	S	P	F	N	WTEDIEGGISSPVKKTEMDKSPFNSPSPQDS	P70255;Q3UHA6	328;328	Casein kinase II substrate motif;G protein-coupled receptor kinase 1 substrate motif;PKA kinase substrate motif;PKC kinase substrate motif	T(0.924)EMDKS(0.952)PFNS(0.062)PS(0.043)PQDS(0.019)PR	32.926	0.923706	0.204642	0.396379	NaN	0.382908	0.327976	6.97492	71.354	2	1090.42	-0.4227
Mtap1a	Microtubule-associated protein 1A;MAP1 light chain LC2	S	1844	1.25504	T	R	A	L	G	L	E	E	S	P	E	E	E	G	K	A	R	DGAVPEKTRALGLEESPEEEGKAREQEEKYW	A2ARP8;Q9QYR6	1844;1606	b-Adrenergic Receptor kinase substrate motif;Casein kinase II substrate motif;ERK1,2 kinase substrate motif;GSK-3, ERK1, ERK2, CDK5 substrate motif;WW domain binding motif	ALGLEES(1)PEEEGK	153.79	1	NaN	0.144046	0.294509	0.544645	0.327733	7.62004	212.24	2	734.316	0.31853
Aftph	Aftiphilin	S	151	1.2535	S	T	G	Q	L	R	S	F	S	P	G	D	F	R	T	D	K	KVVVQGPSTGQLRSFSPGDFRTDKNIVHQTK	Q80WT5;H3BJH7;Q3UU49;Q8C993	151;151;151;151	14-3-3 domain binding motif;AMP-activated protein kinase substrate motif;Calmodulin-dependent protein kinase II substrate motif;Casein kinase II substrate motif;ERK1,2 kinase substrate motif;GSK-3, ERK1, ERK2, CDK5 substrate motif;HMGCoA Reductase kinase substrate motif;PKA kinase substrate motif;PKC kinase substrate motif;Pyruvate dehydrogenase kinase substrate motif;WW domain binding motif	SFS(1)PGDFR	140.45	1	0.616828	0.255924	0.343183	0.0879173	0.325963	7.38158	140.45	2	496.697	-0.24598
Prkaca	cAMP-dependent protein kinase catalytic subunit alpha;cAMP-dependent protein kinase catalytic subunit beta	T	198	1.25228	K	R	V	K	G	R	T	W	T	L	C	G	T	P	E	Y	L	VTDFGFAKRVKGRTWTLCGTPEYLAPEIILS	P05132;P68181	198;198	Calmodulin-dependent protein kinase II substrate motif;G protein-coupled receptor kinase 1 substrate motif;p70 Ribosomal S6 kinase substrate motif;PKC kinase substrate motif	T(0.013)WT(0.987)LCGTPEYLAPEIILSK	187.57	0.98738	-0.183654	-0.229467	0.869095	0.842232	0.324551	7.73814	238.79	3	758.037	-0.81122
Trim56	E3 ubiquitin-protein ligase TRIM56	S	450	1.25048	C	K	G	R	G	K	S	V	S	R	E	P	S	P	I	L	R	RPNKKKKCKGRGKSVSREPSPILRPNLEGSG	Q80VI1	450	Akt kinase substrate motif;Casein kinase II substrate motif;G protein-coupled receptor kinase 1 substrate motif;GSK3 kinase substrate motif;PKA kinase substrate motif;PKC kinase substrate motif	S(0.214)VS(0.792)REPS(0.99)PILRPNLEGS(0.004)GLLPR	45.138	0.791851	0.324119	0.811471	NaN	-0.168129	0.322487	7.66959	60.728	3	845.422	-0.42806
Sltm	SAFB-like transcription modulator	S	550	1.24988	S	E	E	K	K	R	I	S	S	K	S	P	G	H	M	V	I	TSESLKKSEEKKRISSKSPGHMVILNQTKGD	B9EI57;Q8CH25	550;550	14-3-3 domain binding motif;Calmodulin-dependent protein kinase II substrate motif;Casein kinase II substrate motif;MAPKAPK1 kinase substrate motif;MDC1 BRCT domain binding motif;PKA kinase substrate motif;PKC kinase substrate motif;Plk1 PBD domain binding motif	IS(0.009)S(0.964)KS(0.027)PGHMVILNQTK	71.376	0.964181	NaN	0.265077	0.194411	0.505881	0.32179	7.59242	93.424	3	607.309	-0.13336
Kif13a	Kinesin-like protein KIF13A	S	1481	1.24892	R	P	L	L	S	Q	E	D	S	E	E	E	E	N	E	L	E	KRLALEARPLLSQEDSEEEENELEALSRKLM	F8VQ75;Q9EQW7;Q8CDQ6	1481;1481;725	b-Adrenergic Receptor kinase substrate motif;BARD1 BRCT domain binding motif;Casein kinase II substrate motif;G protein-coupled receptor kinase 1 substrate motif;MAPKAPK2 kinase substrate motif	LALEARPLLS(0.005)QEDS(0.995)EEEENELEALSR	98.766	0.995282	NaN	-0.124236	0.576605	0.509676	0.320682	7.46319	132.36	3	1017.48	1.3097
Rps27	40S ribosomal protein S27;40S ribosomal protein S27;40S ribosomal protein S27-like	S	78	1.24821	K	A	R	L	T	E	G	C	S	F	R	R	K	Q	H	_	_	LCQPTGGKARLTEGCSFRRKQH_________	Q6ZWU9;E9QAB4;Q6ZWY3	78;78;78	Casein kinase I substrate motif;PKA kinase substrate motif;PKC kinase substrate motif	LTEGCS(1)FR	109.11	1	0.106616	-0.0925709	0.668432	0.596972	0.319862	7.76391	150.04	2	525.21	0.065068
Marcks	Myristoylated alanine-rich C-kinase substrate	S	27	1.24813	P	G	E	A	A	V	A	S	S	P	S	K	A	N	G	Q	E	GEATAERPGEAAVASSPSKANGQENGHVKVN	P26645;Q05BL6	27;27	Casein kinase II substrate motif;Cdc2 kinase substrate motif;CDK kinase substrate motif;CDK1,2,4,6 kinase substrate motif;ERK1,2 kinase substrate motif;G protein-coupled receptor kinase 1 substrate motif;Growth associated histone HI kinase substrate motif;GSK-3, ERK1, ERK2, CDK5 substrate motif;MDC1 BRCT domain binding motif;Plk1 PBD domain binding motif;WW domain binding motif	GEATAERPGEAAVASS(1)PSK	173.18	0.999896	0.800745	0.0751904	0.465002	-0.0618453	0.319773	8.43578	201.29	2	947.931	0.051147
Trim56	E3 ubiquitin-protein ligase TRIM56	S	454	1.24758	G	K	S	V	S	R	E	P	S	P	I	L	R	P	N	L	E	KKKCKGRGKSVSREPSPILRPNLEGSGLLPR	Q80VI1	454	14-3-3 domain binding motif;Calmodulin-dependent protein kinase II substrate motif;Calmodulin-dependent protein kinase IV substrate motif;Chk1 kinase substrate motif;DNA dependent Protein kinase substrate motif;ERK1,2 kinase substrate motif;GSK-3, ERK1, ERK2, CDK5 substrate motif;MAPKAPK2 kinase substrate motif;PKA kinase substrate motif;PKC epsilon kinase substrate motif;PKC kinase substrate mot…	S(0.437)VS(0.564)REPS(0.998)PILRPNLEGSGLLPR	55.417	0.998492	0.314058	0.811471	NaN	-0.168129	0.319134	7.66959	60.728	3	845.422	-0.77517
Thrap3	Thyroid hormone receptor-associated protein 3	S	695	1.24548	G	L	T	H	E	E	L	K	S	P	R	E	P	G	Y	K	A	PSTFRKHGLTHEELKSPREPGYKAEGKYKDD	A2AJI4;Q569Z6;Q8BZN7;Q91VL2;F7AB07;Q3U503	695;695;695;309;21;14	Casein kinase I substrate motif;Casein kinase II substrate motif;ERK1,2 kinase substrate motif;G protein-coupled receptor kinase 1 substrate motif;Growth associated histone HI kinase substrate motif;GSK-3, ERK1, ERK2, CDK5 substrate motif;PKA kinase substrate motif;PKC kinase substrate motif;WW domain binding motif	HGLTHEELKS(1)PR	86.014	0.999999	NaN	0.189919	0.376133	0.384038	0.316697	8.02715	86.014	3	495.24	-0.20839
Dip2c		S	89	1.2443	G	S	R	D	E	R	Y	R	S	D	V	H	T	E	A	V	Q	YHRRRSSGSRDERYRSDVHTEAVQAALAKHK	E9PWR4;B2RQ71;F7C4U4;B7ZMZ7	89;89;63;145	14-3-3 domain binding motif;Calmodulin-dependent protein kinase II substrate motif;G protein-coupled receptor kinase 1 substrate motif;MAPKAPK2 kinase substrate motif;PKA kinase substrate motif;PKC kinase substrate motif	Y(0.021)RS(0.978)DVHTEAVQAALAK	88.565	0.978477	NaN	0.122209	0.419025	0.404764	0.315332	7.17768	88.565	3	613.631	-0.57755
Abcf1	ATP-binding cassette sub-family F member 1	S	224	1.24343	D	K	K	E	A	E	Q	G	S	G	E	E	K	E	E	K	E	PQQGKDRDKKEAEQGSGEEKEEKEGDLKAND	Q5RL55;Q6P542;A1A4B8	224;225;224	Casein kinase I substrate motif;Casein kinase II substrate motif	EAEQGS(1)GEEKEEKEGDLK	190.31	1	0.166715	0.356031	0.404477	0.330066	0.314322	8.25595	267.92	2	1036.44	0.1287
Flna	Filamin-A	T	1750	1.24288	A	G	D	Q	P	T	V	Q	T	P	L	R	S	Q	Q	L	A	PFQVTALAGDQPTVQTPLRSQQLAPQYNYPQ	Q8BTM8;B7FAU9;B9EKP5;Q6KAM8;F6Z2C0	1750;1742;1742;1055;33	Cdc2 kinase substrate motif;CDK1,2,4,6 kinase substrate motif;G protein-coupled receptor kinase 1 substrate motif;GSK-3, ERK1, ERK2, CDK5 substrate motif;WW domain binding motif	FGGEHVPNSPFQVTALAGDQPTVQT(1)PLR	140.41	0.999998	0.768925	-0.74468	0.916807	NaN	0.313684	7.34274	140.41	3	1015.16	1.1314
Myh9	Myosin-9	S	1943	1.24169	V	R	K	G	T	G	D	C	S	D	E	E	V	D	G	K	A	FVVTRRIVRKGTGDCSDEEVDGKADGADAKA	Q8VDD5;Q3UFT0;Q811J9;Q99JJ3;Q7TQJ6	1943;942;558;512;361	BARD1 BRCT domain binding motif;Casein kinase II substrate motif	KGT(1)GDCS(1)DEEVDGK	133.16	1	0.373398	0.168899	0.533952	0.172994	0.312311	9.30432	235.71	2	828.778	-0.31468
Spna2	Spectrin alpha chain, brain	S	1197	1.24169	K	E	L	N	E	R	W	R	S	L	Q	Q	L	A	E	E	R	VATFNSIKELNERWRSLQQLAEERSQLLGSA	E9Q447;A3KGU7;B2RXX6;B9EKJ1;P16546;A3KGU5;B7ZWK3;Q3TNY2	1197;1217;1217;1217;1217;1197;1197;100	14-3-3 domain binding motif;Calmodulin-dependent protein kinase II substrate motif;MAPKAPK2 kinase substrate motif;Phosphorylase kinase substrate motif;PKA kinase substrate motif;PKC kinase substrate motif	WRS(1)LQQLAEER	130.01	1	0.313478	0.184852	0.440498	0.310397	0.312306	8.05846	139.66	2	748.356	0.89536
Plekhg5	Pleckstrin homology domain-containing family G member 5	S	941	1.24146	L	L	K	S	K	S	E	A	S	L	L	Q	L	L	S	G	T	LLPRPPRLLKSKSEASLLQLLSGTPAARGVP	Q66T02;B1AS68;B1AS67	941;941;928	PKA kinase substrate motif	SKS(0.02)EAS(0.979)LLQLLSGTPAAR	171.26	0.979113	0.397146	0.319155	0.313531	0.21833	0.31204	7.48157	171.26	3	636.998	-0.24353
Srrm2	Serine/arginine repetitive matrix protein 2	T	841	1.24121	M	Q	A	D	E	C	T	A	T	P	Q	R	Q	S	H	S	E	RPGSVTNMQADECTATPQRQSHSESSPDGEV	Q8BTI8	841	Cdc2 kinase substrate motif;CDK1,2,4,6 kinase substrate motif;GSK-3, ERK1, ERK2, CDK5 substrate motif;WW domain binding motif	S(0.5)GT(0.5)PPRPGS(0.001)VTNMQADECT(0.001)AT(0.999)PQR	72.167	0.998714	-0.321856	-0.215178	0.332008	1.45202	0.311748	8.32515	118.05	3	912.038	-0.95426
Sec31a	Protein transport protein Sec31A	S	526	1.23939	K	D	S	D	Q	V	A	Q	S	D	G	E	E	S	P	A	A	DGPDVALKDSDQVAQSDGEESPAAEEQLLGE	Q3UPL0	526	Casein kinase II substrate motif	VDGPDVALKDSDQVAQS(1)DGEESPAAEEQLLGER	158.06	0.999997	0.43957	0.383718	0.175745	0.239498	0.309633	9.1583	200.74	3	1178.86	0.15586
Map4k4		T	862	1.2391	N	E	T	Q	S	A	S	S	T	L	Q	K	H	K	S	S	S	PQDKLTANETQSASSTLQKHKSSSSFTPFID	F7BS72;Q6ZQ68;B2RUE8	862;862;828	MAPKAPK2 kinase substrate motif;MDC1 BRCT domain binding motif;Plk1 PBD domain binding motif	LTANETQSASS(0.006)T(0.994)LQK	152.32	0.994045	0.263155	-0.613167	1.27788	NaN	0.30929	7.17058	179.1	2	829.885	-0.42707
Nes	Nestin	S	1541	1.23831	D	W	E	E	G	R	E	D	S	E	A	D	E	L	G	E	T	EIPEGLQDWEEGREDSEADELGETLPDSTPL	Q6P5H2	1541	14-3-3 domain binding motif;b-Adrenergic Receptor kinase substrate motif;Calmodulin-dependent protein kinase II substrate motif;Casein kinase II substrate motif;G protein-coupled receptor kinase 1 substrate motif;PKA kinase substrate motif;PKC epsilon kinase substrate motif;PKC kinase substrate motif;Pyruvate dehydrogenase kinase substrate motif	GEIPEGLQDWEEGREDS(0.999)EADELGET(0.001)LPDSTPLGLYLK	60.876	0.999018	0.200128	0.300768	0.205846	0.526764	0.308376	7.9264	83.054	3	1389.96	-0.33525
Marcks	Myristoylated alanine-rich C-kinase substrate	T	143	1.2378	A	A	P	S	P	S	S	E	T	P	K	K	K	K	K	R	F	SPKAEDGAAPSPSSETPKKKKKRFSFKKSFK	P26645;Q05BL6	143;143	b-Adrenergic Receptor kinase substrate motif;Cdc2 kinase substrate motif;CDK1,2,4,6 kinase substrate motif;CDK5 kinase substrate motif;Growth associated histone HI kinase substrate motif;GSK-3, ERK1, ERK2, CDK5 substrate motif;PKA kinase substrate motif;PKC kinase substrate motif;WW domain binding motif	AEDGAAPSPSS(0.004)ET(0.996)PK	123.76	0.995623	0.602457	-0.26807	0.749087	0.147634	0.307777	8.69276	184.6	2	762.317	0.32552
Emg1	Ribosomal RNA small subunit methyltransferase NEP1	S	16	1.23712	F	Q	P	R	E	R	R	F	S	V	Q	E	Q	D	W	E	T	MSAASGGFQPRERRFSVQEQDWETTPPKKLR	O35130;Q542P8	16;16	14-3-3 domain binding motif;Akt kinase substrate motif;Aurora-A kinase substrate motif;Calmodulin-dependent protein kinase II substrate motif;Casein kinase II substrate motif;DMPK1 kinase substrate motif;MAPKAPK1 kinase substrate motif;p70 Ribosomal S6 kinase substrate motif;PAK2 kinase substrate motif;Phosphorylase kinase substrate motif;PKA kinase substrate motif;PKC epsilon kinase substrate mo…	RFS(1)VQEQDWETTPPK	109.5	1	0.280481	0.490057	0.150417	NaN	0.306985	7.50825	109.5	2	964.433	0.96928
Twistnb	DNA-directed RNA polymerase I subunit RPA43	S	306	1.23562	A	S	D	S	S	G	Y	Q	S	D	H	N	K	K	K	K	K	DQDPIFQASDSSGYQSDHNKKKKKRKHSEEA	B2RT77;Q78WZ7	306;306	MAPKAPK2 kinase substrate motif	HQEDQDPIFQASDSSGY(0.001)QS(0.999)DHNK	119.37	0.999125	-0.0220827	0.124063	0.463609	0.655331	0.30523	7.72742	167.67	3	905.031	-0.39564
Pdlim2	PDZ and LIM domain protein 2	S	204	1.23541	L	L	H	S	P	G	R	P	S	S	P	R	F	S	S	L	D	SDSAVRVLLHSPGRPSSPRFSSLDLEEDSEV	Q8R1G6;E9Q996	204;204	DNA dependent Protein kinase substrate motif;PKA kinase substrate motif;PKC kinase substrate motif	VLLHS(1)PGRPS(0.949)S(0.051)PR	124.84	0.948864	0.00273846	0.4654	0.551057	0.200747	0.304985	8.24564	124.84	2	781.866	0.058662
Ahnak		S	5504	1.2352	K	G	K	G	G	V	T	G	S	P	E	A	S	I	S	G	S	KHIFSKSKGKGGVTGSPEASISGSKGDLKSS	E9Q616;Q8VDN3;E9Q1H8;Q6UIL4;Q8CGE7	5504;872;585;525;513	Casein kinase I substrate motif;Casein kinase II substrate motif;ERK1,2 kinase substrate motif;G protein-coupled receptor kinase 1 substrate motif;GSK3 kinase substrate motif;GSK-3, ERK1, ERK2, CDK5 substrate motif;WW domain binding motif	GGVTGS(1)PEAS(1)ISGSK	169.84	0.999998	0.310573	0.433387	0.231837	0.243199	0.304749	9.52156	271.64	2	747.3	0.19385
Synpo		S	1091	1.23471	G	S	L	R	L	K	R	G	S	L	P	T	E	A	S	C	T	ICPRGWNGSLRLKRGSLPTEASCTT______	E9Q3E2;Q3U336;Q497V1;Q3TA13	1091;892;200;891	Aurora-A kinase substrate motif;Casein kinase I substrate motif;Casein kinase II substrate motif;PAK2 kinase substrate motif;Phosphorylase kinase substrate motif;PKA kinase substrate motif;PKC kinase substrate motif	RGS(0.987)LPT(0.013)EASCTT	87.932	0.987449	-0.146899	-0.408033	0.861317	0.910285	0.304167	7.26119	116.24	2	680.284	-0.37186
Uhrf1	E3 ubiquitin-protein ligase UHRF1	S	91	1.2347	T	K	E	R	D	S	E	L	S	D	S	D	S	G	Y	G	V	SLALPLSTKERDSELSDSDSGYGVGHSESDK	Q3UIE6;Q3ULF2;Q3ULQ0;Q8VDF2;Q3U9D7;Q3UI74;E9Q5Y5	91;91;91;91;91;91;91	Casein kinase II substrate motif;G protein-coupled receptor kinase 1 substrate motif;GSK3 kinase substrate motif;Pyruvate dehydrogenase kinase substrate motif	ERDS(0.012)ELS(0.987)DS(0.002)DSGYGVGHSESDK	171.78	0.986515	0.0137839	0.0817487	0.495654	0.625444	0.304158	7.77649	208.97	3	812.654	0.62199
Eif4g1	Eukaryotic translation initiation factor 4 gamma 1	S	1096	1.23359	L	F	A	P	G	G	R	L	S	W	G	K	G	S	S	G	G	SIDSNNQLFAPGGRLSWGKGSSGGSGAKPSD	Q6NZJ6;E9PVC5;E9Q9E1;E9PVC6;E9Q298;Q6PD42;Q8K0J8	1096;1090;1089;1049;326;319;138	PKA kinase substrate motif;PKC kinase substrate motif	ITKPGSIDSNNQLFAPGGRLS(1)WGK	124.79	1	0.487486	0.422125	-0.00100955	NaN	0.302867	7.93602	124.79	3	875.106	-0.57009
Phldb2	Pleckstrin homology-like domain family B member 2	S	510	1.23328	R	Y	R	C	H	R	K	G	S	L	Q	D	V	D	V	A	G	ALVCPDARYRCHRKGSLQDVDVAGFGNLGHS	Q8K1N2;D3Z069	510;555	14-3-3 domain binding motif;Calmodulin-dependent protein kinase II substrate motif;Casein kinase II substrate motif;Phosphorylase kinase substrate motif;PKA kinase substrate motif;PKC epsilon kinase substrate motif;PKC kinase substrate motif;Pyruvate dehydrogenase kinase substrate motif	KGS(1)LQDVDVAGFGNLGHSASFLAPR	122.89	1	0.159242	0.00575919	0.380765	0.664219	0.302496	8.36065	166.03	3	875.094	0.66224
Arhgap5	Rho GTPase-activating protein 5	S	1219	1.23269	G	I	D	N	P	A	I	T	S	D	Q	E	V	D	D	K	K	PVETWKGGIDNPAITSDQEVDDKKIKKKTHK	B9EKC3;E9PYT0;P97393	1219;1219;1217	Casein kinase II substrate motif	GGIDNPAIT(0.001)S(0.999)DQEVDDKK	245.82	0.998764	0.131063	0.572696	0.344831	0.158639	0.301807	8.20712	245.82	2	991.441	0.414
Zmynd8		S	694	1.23257	P	T	P	A	K	D	K	A	S	P	E	P	E	K	D	F	V	PVSEKPDPTPAKDKASPEPEKDFVEKAKPSP	Q80Y82;Q8CHB3;A2A484;E9Q8D3;A2A482;A2A483;Q3U1M7;E9Q8D1;Q3V1I9;Q3UH28;A2A485;Q80XT8;Q3V437	694;692;674;674;645;670;665;664;664;645;665;342;118	Casein kinase I substrate motif;Casein kinase II substrate motif;ERK1,2 kinase substrate motif;GSK-3, ERK1, ERK2, CDK5 substrate motif;PKA kinase substrate motif;PKC kinase substrate motif;WW domain binding motif	AS(1)PEPEKDFVEK	96.489	1	0.52085	0.300768	0.257338	0.127715	0.301668	7.94185	96.489	2	728.324	0.15215
Nsrp1	Nuclear speckle splicing regulatory protein 1	S	33	1.23172	K	P	S	V	F	G	S	D	S	D	D	D	E	T	S	V	S	PLHRVLQKPSVFGSDSDDDETSVSESLQREA	Q5NCR9;A0PJ67;Q8BQY7;Q3V3D1;Q3TSC4;Q5NCR8	33;33;33;33;33;29	b-Adrenergic Receptor kinase substrate motif;Casein kinase II substrate motif;Pyruvate dehydrogenase kinase substrate motif	VLQKPS(0.293)VFGS(0.717)DS(0.989)DDDET(0.001)SVSESLQR	102.66	0.989231	-0.073788	0.172231	1.19268	-0.088413	0.300677	7.52107	102.66	3	962.409	0.039865
Tenc1	Tensin-like C1 domain-containing phosphatase	S	481	1.2307	H	T	R	G	P	L	D	G	S	P	Y	A	Q	V	Q	R	V	SVDGALAHTRGPLDGSPYAQVQRVPRQTPPA	Q8CGB6	481	ERK1,2 kinase substrate motif;GSK-3, ERK1, ERK2, CDK5 substrate motif;WW domain binding motif	GPLDGS(1)PYAQVQR	119.54	0.999965	0.634965	0.072586	NaN	0.190898	0.299483	6.90292	119.54	2	734.335	1.862
Eif5b	Eukaryotic translation initiation factor 5B	S	139	1.22991	N	S	E	A	P	L	S	G	S	E	D	A	D	D	S	N	K	SKKTARPNSEAPLSGSEDADDSNKLSKKGKK	Q05D44	139	G protein-coupled receptor kinase 1 substrate motif	TARPNSEAPLS(1)GS(1)EDADDSNK	181.95	1	1.01078	-0.205946	-0.355918	0.745285	0.29855	8.74349	291.2	2	1160.95	-0.19234
Irs2	Insulin receptor substrate 2	S	573	1.22893	R	G	L	R	K	R	T	Y	S	L	T	T	P	A	R	Q	R	DGAQDLDRGLRKRTYSLTTPARQRQVPQPSS	P81122;Q3U2I0	573;513	14-3-3 domain binding motif;Akt kinase substrate motif;Calmodulin-dependent protein kinase II substrate motif;Casein kinase I substrate motif;Casein kinase II substrate motif;G protein-coupled receptor kinase 1 substrate motif;MAPKAPK1 kinase substrate motif;p70 Ribosomal S6 kinase substrate motif;Phosphorylase kinase substrate motif;PKA kinase substrate motif;PKC kinase substrate motif	TYS(0.999)LT(0.001)TPAR	119.27	0.999179	1.01842	2.26198	-1.00454	-1.08624	0.297406	7.84758	132.25	2	545.252	0.12059
Pcyt1a	Choline-phosphate cytidylyltransferase A	S	331	1.2286	S	P	T	H	E	R	S	P	S	P	S	F	R	W	P	F	S	PKQSPSSSPTHERSPSPSFRWPFSGKTSPSS	P49586	331	14-3-3 domain binding motif;Calmodulin-dependent protein kinase II substrate motif;Casein kinase II substrate motif;DNA dependent Protein kinase substrate motif;ERK1,2 kinase substrate motif;GSK-3, ERK1, ERK2, CDK5 substrate motif;PKA kinase substrate motif;PKC kinase substrate motif;WW domain binding motif	SPS(1)PSFR	147.29	0.999952	0.588517	0.166201	0.340368	0.0929555	0.29701	7.69225	147.29	2	429.181	-0.84858
Hirip3	HIRA-interacting protein 3	T	572	1.22835	S	P	G	E	T	Y	R	R	T	L	D	S	E	E	E	Q	P	NPSGEGTSPGETYRRTLDSEEEQPRQAPPDW	Q8BLH7	572	Casein kinase I substrate motif;Casein kinase II substrate motif;PKA kinase substrate motif;PKC kinase substrate motif	T(0.953)LDS(0.047)EEEQPR	86.898	0.952797	0.674913	0.198368	0.148193	0.165434	0.296727	7.81571	102.06	2	642.261	-0.98089
Tnks1bp1	182 kDa tankyrase-1-binding protein	S	796	1.22752	T	R	E	W	A	S	R	H	S	L	G	Q	E	V	I	G	I	QGSGEGSTREWASRHSLGQEVIGIGGSQDES	B9EKJ7;P58871	796;796	PKA kinase substrate motif;PKC kinase substrate motif	HS(1)LGQEVIGIGGSQDESEVPVR	100.39	1	0.181929	NaN	0.483763	0.221539	0.295744	7.64958	100.7	3	791.708	-0.34783
Sh3bp5l	SH3 domain-binding protein 5-like	S	361	1.22612	L	R	G	L	S	D	H	A	S	L	D	G	Q	E	L	G	A	KCDSVEHLRGLSDHASLDGQELGAQSRGRRG	Q99LH9;Q80TA2	361;350	Casein kinase I substrate motif;MAPKAPK2 kinase substrate motif	GLSDHAS(1)LDGQELGAQSR	138.25	0.999978	0.476122	0.248656	0.516078	-0.0644689	0.294097	7.52768	138.25	2	960.926	-0.035674
Ahnak		S	576	1.22597	G	K	I	G	A	C	R	I	S	M	A	D	V	D	L	N	V	PKISSPSGKIGACRISMADVDLNVAAPKGKG	E9Q616;F7BRM2;Q6UL10;Q61484	576;311;311;53	Casein kinase II substrate motif;PKA kinase substrate motif;PKC kinase substrate motif;Pyruvate dehydrogenase kinase substrate motif	IGACRIS(1)MADVDLNVAAPK	107.03	1	0.62798	0.515006	-0.26123	NaN	0.293919	7.0016	111.22	3	694.335	-0.18276
Vcl	Vinculin	S	290	1.22592	G	W	L	R	D	P	N	A	S	P	G	D	A	G	E	Q	A	SKLNQAKGWLRDPNASPGDAGEQAIRQILDE	Q64727	290	Casein kinase II substrate motif;ERK1,2 kinase substrate motif;G protein-coupled receptor kinase 1 substrate motif;GSK-3, ERK1, ERK2, CDK5 substrate motif;Pyruvate dehydrogenase kinase substrate motif;WW domain binding motif	GWLRDPNAS(1)PGDAGEQAIR	96.447	1	0.550408	0.344488	0.208311	0.0722401	0.293862	8.19207	126.97	3	697.32	-0.43058
Iqgap1	Ras GTPase-activating-like protein IQGAP1	S	26	1.22584	G	D	L	D	S	A	A	M	S	A	A	E	E	V	D	G	L	RSLRFLTGDLDSAAMSAAEEVDGLGVVRPHY	F6ZJB0;Q6ZQK2;G3UW45;Q80UW7;Q9JKF1;Q05CQ4;Q8CGH5;Q3TPD2;Q3TR56;Q8CDW9;Q9D408	26;26;2;2;2;2;2;2;2;2;2	Casein kinase II substrate motif;MAPKAPK2 kinase substrate motif	S(1)AAEEVDGLGVVRPHYGSVLDNER	109.19	1	0.0528332	0.286408	0.246721	0.589116	0.29377	7.50147	109.19	3	897.752	-0.17384
Tenc1	Tensin-like C1 domain-containing phosphatase	S	1087	1.22577	L	P	G	S	G	Q	Q	P	S	P	P	A	R	S	T	N	Q	PLPEKRHLPGSGQQPSPPARSTNQHVTFASP	Q8CGB6	1087	DNA dependent Protein kinase substrate motif;ERK1,2 kinase substrate motif;GSK-3, ERK1, ERK2, CDK5 substrate motif;WW domain binding motif	HLPGSGQQPS(1)PPAR	96.059	1	0.367147	0.327917	0.185983	NaN	0.293683	7.17612	99.941	3	503.572	-0.20824
Rangap1	Ran GTPase-activating protein 1	S	487	1.22432	G	E	P	A	P	V	L	S	S	P	T	P	T	D	L	S	T	KILDPNSGEPAPVLSSPTPTDLSTFLSFPSP	F8WGD1;Q6ZPH4;P46061;Q7TMW1;Q8C2E3;Q91YS2;E9Q757;Q3ULJ9;Q3UZD8;E9Q2J7	487;487;430;430;430;430;325;324;237;236	Casein kinase I substrate motif;Casein kinase II substrate motif;ERK1,2 kinase substrate motif;G protein-coupled receptor kinase 1 substrate motif;GSK-3, ERK1, ERK2, CDK5 substrate motif;MDC1 BRCT domain binding motif;Plk1 PBD domain binding motif;WW domain binding motif	ILDPNSGEPAPVLS(0.024)S(0.906)PT(0.066)PT(0.003)DLS(0.001)T(0.001)FLS(0.014)FPS(0.984)PEK	77.917	0.905944	0.236952	NaN	0.284405	0.354594	0.291983	7.95223	111.89	3	1167.54	-0.67147
Dck	Deoxycytidine kinase	S	11	1.22289	T	P	P	K	R	F	C	P	S	P	S	T	S	S	E	G	T	_____MATPPKRFCPSPSTSSEGTRIKKISI	P43346;Q545E8;Q80US6	11;11;11	Casein kinase I substrate motif;Casein kinase II substrate motif;DNA dependent Protein kinase substrate motif;ERK1,2 kinase substrate motif;G protein-coupled receptor kinase 1 substrate motif;GSK3 kinase substrate motif;GSK-3, ERK1, ERK2, CDK5 substrate motif;WW domain binding motif	FCPS(0.999)PS(0.001)TSSEGTR	128.96	0.999226	0.413161	0.220701	0.306413	0.2209	0.290294	8.15755	128.96	2	746.792	-0.35437
Zc3hc1	Nuclear-interacting partner of ALK	S	353	1.22191	G	P	I	V	S	R	T	R	S	W	E	S	S	S	P	V	D	EQSEKSPGPIVSRTRSWESSSPVDRPELEAA	Q80YV2;H3BKM2	353;311	14-3-3 domain binding motif;Calmodulin-dependent protein kinase II substrate motif;Calmodulin-dependent protein kinase IV substrate motif;Casein kinase I substrate motif;Casein kinase II substrate motif;Chk1 kinase substrate motif;G protein-coupled receptor kinase 1 substrate motif;GSK3 kinase substrate motif;MAPKAPK2 kinase substrate motif;PKA kinase substrate motif;PKC kinase substrate motif	T(0.045)RS(0.954)WESSSPVDRPELEAASPTTR	67.832	0.954305	0.62798	0.804549	-0.0683268	-0.207643	0.28914	7.66777	67.832	3	880.408	-0.36834
Mtap1a	Microtubule-associated protein 1A;MAP1 light chain LC2	S	1818	1.22154	K	E	M	T	L	D	Q	K	S	P	E	K	A	K	G	V	E	EDKSTTPKEMTLDQKSPEKAKGVEQQDGAVP	A2ARP8;Q9QYR6	1818;1580	Casein kinase I substrate motif;Casein kinase II substrate motif;Cdc2 kinase substrate motif;CDK kinase substrate motif;CDK1,2,4,6 kinase substrate motif;ERK1,2 kinase substrate motif;G protein-coupled receptor kinase 1 substrate motif;Growth associated histone HI kinase substrate motif;GSK-3, ERK1, ERK2, CDK5 substrate motif;WW domain binding motif	EMTLDQKS(1)PEKAK	51.888	0.999706	-0.119793	0.174279	0.381461	0.718877	0.288706	7.78551	130.01	2	792.871	-0.62136
Wdr77	Methylosome protein 50	T	5	1.22042	_	_	_	_	M	R	K	D	T	P	P	P	L	V	P	P	A	___________MRKDTPPPLVPPAAREWNLP	Q99J09;D6RIL4	5;5	AMP-activated protein kinase substrate motif;b-Adrenergic Receptor kinase substrate motif;Calmodulin-dependent protein kinase II substrate motif;GSK-3, ERK1, ERK2, CDK5 substrate motif;PKA kinase substrate motif;PKC kinase substrate motif;WW domain binding motif	DT(1)PPPLVPPAAR	84.297	1	0.425567	0.355918	0.149409	0.218598	0.287373	7.78738	89.507	2	655.829	0.18485
Cep170	Centrosomal protein of 170 kDa	S	1102	1.21591	R	R	A	R	L	G	E	A	S	D	S	E	L	A	D	A	D	PTRTSLLRRARLGEASDSELADADKASVASE	Q6A065;H7BX26	1102;1102	Casein kinase II substrate motif	LGEAS(1)DSELADADK	171.29	0.999994	0.381173	-0.0176361	0.46031	0.304291	0.282034	8.24189	188.71	2	750.809	-0.24044
Steap3	Metalloreductase STEAP3	S	55	1.21571	L	I	S	R	R	L	V	D	S	D	G	S	L	A	E	V	P	SGEMDKPLISRRLVDSDGSLAEVPKEAPKVG	E9QN92;Q8CI59;D3YTP0	55;17;17	b-Adrenergic Receptor kinase substrate motif;Casein kinase I substrate motif;Casein kinase II substrate motif	RLVDS(0.921)DGS(0.079)LAEVPK	61.477	0.920671	NaN	-0.119714	1.60489	-0.639788	0.281797	6.99792	73.11	2	783.382	-0.18264
Vcpip1	Deubiquitinating protein VCIP135	S	1022	1.21537	A	T	T	R	S	R	E	S	S	P	S	H	G	L	L	K	L	VSQVRAEATTRSRESSPSHGLLKLGSGGVVK	F6ZDG3;Q80T83;Q8CDG3	1022;1022;997	14-3-3 domain binding motif;Akt kinase substrate motif;Calmodulin-dependent protein kinase II substrate motif;Casein kinase II substrate motif;ERK1,2 kinase substrate motif;GSK-3, ERK1, ERK2, CDK5 substrate motif;MAPKAPK1 kinase substrate motif;MAPKAPK2 kinase substrate motif;MDC1 BRCT domain binding motif;PKA kinase substrate motif;PKC epsilon kinase substrate motif;PKC kinase substrate motif;Pl…	S(0.106)RES(0.804)S(0.937)PS(0.153)HGLLK	70.47	0.937189	NaN	0.306146	0.355775	0.182279	0.2814	7.42649	91.317	2	729.313	0.2431
Nexn	Nexilin	S	80	1.21368	Q	E	I	K	E	M	L	A	S	D	D	E	E	E	S	S	P	REWNRRKQEIKEMLASDDEEESSPKIEKAYV	G4W8R2;Q7TPW1;G4W8R3;G4W8R4	80;16;80;80	BARD1 BRCT domain binding motif;Casein kinase II substrate motif	EMLAS(1)DDEEESSPK	142.32	1	0.259905	NaN	0.43452	0.143755	0.279393	7.61481	142.32	2	823.811	-0.2193
Ncapd2	Condensin complex subunit 1;Condensin complex subunit 1	S	1323	1.21279	L	Q	P	L	T	S	V	D	S	D	N	D	F	V	T	P	K	KPSAVSRLQPLTSVDSDNDFVTPKPRRTKPG	E9QPT2;Q8K2Z4	1323;1323	b-Adrenergic Receptor kinase substrate motif;Casein kinase II substrate motif;Pyruvate dehydrogenase kinase substrate motif	LQPLTSVDS(1)DNDFVTPKPR	214.44	0.999699	0.524565	-0.348372	NaN	0.658811	0.278335	7.49466	214.44	2	1105.03	-0.01587
Specc1l	Cytospin-A	S	833	1.21237	G	M	G	L	S	R	R	S	S	T	S	S	E	P	T	P	T	DLAALRQGMGLSRRSSTSSEPTPTVKTLIKS	Q2KN98;Q6GQV8;Q8CI53	833;743;491	14-3-3 domain binding motif;Calmodulin-dependent protein kinase II substrate motif;Calmodulin-dependent protein kinase IV substrate motif;Casein kinase I substrate motif;Casein kinase II substrate motif;Chk1 kinase substrate motif;MAPKAPK2 kinase substrate motif;MDC1 BRCT domain binding motif;PAK2 kinase substrate motif;PKA kinase substrate motif;PKC epsilon kinase substrate motif;PKC kinase subs…	RS(0.001)S(0.996)T(0.001)SSEPTPTVK	183.58	0.996349	NaN	-0.276398	0.462893	0.646993	0.277829	7.8113	183.58	2	728.838	0.29642
Sec16a		S	1028	1.21211	L	E	N	P	V	R	M	Y	S	P	S	P	S	D	G	P	A	DFTLNRTLENPVRMYSPSPSDGPASQQPLPN	A2AIX1;E9QAT4	1028;1028	14-3-3 domain binding motif;Calmodulin-dependent protein kinase II substrate motif;Casein kinase I substrate motif;Casein kinase II substrate motif;ERK1,2 kinase substrate motif;G protein-coupled receptor kinase 1 substrate motif;GSK3 kinase substrate motif;GSK-3, ERK1, ERK2, CDK5 substrate motif;PKA kinase substrate motif;PKC kinase substrate motif;WW domain binding motif	MYS(0.999)PS(0.001)PSDGPASQQPLPNHPR	128.38	0.998734	0.227864	0.281312	0.366504	0.234397	0.277519	8.20398	128.38	3	781.679	0.072203
Zranb2	Zinc finger Ran-binding domain-containing protein 2	S	300	1.21136	E	R	D	R	K	R	S	R	S	R	P	S	S	P	A	V	R	SSSSSSPERDRKRSRSRPSSPAVRKKRRTRS	D3Z4T9;B2RRT9;D3Z4U0;Q9R020;E9PUD0	300;290;300;290;253	14-3-3 domain binding motif;Akt kinase substrate motif;Calmodulin-dependent protein kinase II substrate motif;Casein kinase I substrate motif;Casein kinase II substrate motif;G protein-coupled receptor kinase 1 substrate motif;GSK3 kinase substrate motif;MAPKAPK1 kinase substrate motif;PKA kinase substrate motif;PKC kinase substrate motif;ZIP kinase substrate motif	S(0.998)RPS(0.501)S(0.501)PAVR	67.234	0.997842	0.309293	-0.458287	0.704747	0.550761	0.276628	7.59254	69.485	2	558.734	0.12593
Bclaf1	Bcl-2-associated transcription factor 1	T	403	1.21101	S	E	G	D	D	T	E	E	T	E	D	Y	R	Q	F	R	K	AKQKFHDSEGDDTEETEDYRQFRKSVLADQG	Q8K019;F8WI22;Q3UDL9;Q3UR37;H7BX81;Q3TSZ0;Q3TRC6;E9Q5V0;Q05C67	403;403;403;401;403;403;403;403;403	b-Adrenergic Receptor kinase substrate motif;Casein kinase II substrate motif;G protein-coupled receptor kinase 1 substrate motif	FHDS(0.021)EGDDT(0.021)EET(0.952)EDY(0.006)RQFR	35.015	0.951745	NaN	0.518636	0.0647817	0.245198	0.276205	7.62591	80.142	3	819.315	0.45746
Srsf1	Serine/arginine-rich splicing factor 1	S	201	1.21072	K	V	D	G	P	R	S	P	S	Y	G	R	S	R	S	R	S	ETAYIRVKVDGPRSPSYGRSRSRSRSRSRSR	H7BX95;Q6PDM2	201;201	14-3-3 domain binding motif;Calmodulin-dependent protein kinase II substrate motif;CLK1 kinase substrate motif;DNA dependent Protein kinase substrate motif;G protein-coupled receptor kinase 1 substrate motif;GSK3 kinase substrate motif;PKA kinase substrate motif;PKC kinase substrate motif	VDGPRS(0.999)PS(1)Y(0.001)GR	39.629	0.999596	0.325847	0.101516	0.324491	0.351608	0.275865	8.40514	67.234	2	675.766	0.18544
Nucks1	Nuclear ubiquitous casein and cyclin-dependent kinase substrate 1	S	73	1.21058	D	V	K	T	K	K	D	D	S	H	S	A	E	D	S	E	D	SEDSEEKDVKTKKDDSHSAEDSEDEKDDHKN	Q80XU3	73	b-Adrenergic Receptor kinase substrate motif;Casein kinase II substrate motif;PKA kinase substrate motif;PKC kinase substrate motif	DDS(1)HS(1)AEDS(1)EDEKDDHKNVR	109.44	1	NaN	0.482952	0.144106	0.200051	0.275703	7.99908	109.44	3	856.625	0.20791
Strn4	Striatin-4	S	276	1.21016	L	Q	N	C	E	D	E	D	S	D	E	D	D	E	L	D	S	VLEQIPFLQNCEDEDSDEDDELDSVQHKKQR	P58404;Q3U3S0	276;276	b-Adrenergic Receptor kinase substrate motif;Casein kinase I substrate motif;Casein kinase II substrate motif;Pyruvate dehydrogenase kinase substrate motif	LGGSVLEQIPFLQNCEDEDS(0.999)DEDDELDS(0.001)VQHK	69.356	0.999432	0.398788	0.0294175	0.367899	0.304665	0.275193	7.79416	119.45	3	1247.53	0.51231
Igf2bp2	Insulin-like growth factor 2 mRNA-binding protein 2	S	162	1.20878	Y	I	P	D	E	E	V	S	S	P	S	P	P	H	R	A	R	DYSFKISYIPDEEVSSPSPPHRAREQGHGPG	Q5SF07;A6X8Z3	162;94	Casein kinase I substrate motif;Casein kinase II substrate motif;ERK1,2 kinase substrate motif;G protein-coupled receptor kinase 1 substrate motif;GSK-3, ERK1, ERK2, CDK5 substrate motif;MDC1 BRCT domain binding motif;Plk1 PBD domain binding motif;WW domain binding motif	IS(0.002)Y(0.002)IPDEEVS(0.173)S(0.818)PS(0.006)PPHR	64.83	0.817964	0.329985	NaN	0.300857	0.189828	0.273557	7.68705	98.391	3	663.97	-0.095618
Sorbs1	Sorbin and SH3 domain-containing protein 1	S	298	1.20869	P	A	R	S	S	S	L	K	S	S	P	E	R	N	D	W	E	RSATLPLPARSSSLKSSPERNDWEPLDKKVD	Q62417	298	Casein kinase II substrate motif;MAPKAPK2 kinase substrate motif	S(0.5)S(0.5)PERNDWEPLDKK	64.537	0.5	0.149389	-0.0163953	0.687335	NaN	0.273443	7.47936	79.317	3	594.268	-0.24506
Sorbs1	Sorbin and SH3 domain-containing protein 1	S	299	1.20869	A	R	S	S	S	L	K	S	S	P	E	R	N	D	W	E	P	SATLPLPARSSSLKSSPERNDWEPLDKKVDT	Q62417	299	Casein kinase II substrate motif;Cdc2 kinase substrate motif;CDK kinase substrate motif;CDK1,2,4,6 kinase substrate motif;ERK1,2 kinase substrate motif;Growth associated histone HI kinase substrate motif;GSK-3, ERK1, ERK2, CDK5 substrate motif;MAPKAPK2 kinase substrate motif;MDC1 BRCT domain binding motif;PKA kinase substrate motif;PKC kinase substrate motif;Plk1 PBD domain binding motif;WW domai…	S(0.5)S(0.5)PERNDWEPLDKK	64.537	0.5	0.149389	-0.0163953	0.687335	NaN	0.273443	7.47936	79.317	3	594.268	-0.24506
Bclaf1	Bcl-2-associated transcription factor 1	T	400	1.20854	F	H	D	S	E	G	D	D	T	E	E	T	E	D	Y	R	Q	KESAKQKFHDSEGDDTEETEDYRQFRKSVLA	Q8K019;F8WI22;Q3UDL9;Q3UR37;H7BX81;Q3TSZ0;Q3TRC6;E9Q5V0;Q05C67	400;400;400;398;400;400;400;400;400	b-Adrenergic Receptor kinase substrate motif;Casein kinase I substrate motif;G protein-coupled receptor kinase 1 substrate motif	FHDS(1)EGDDT(1)EETEDYR	342.19	1	0.414352	0.255078	0.178437	0.245198	0.273266	8.0016	342.19	2	1052.84	0.55329
Tjp2	Tight junction protein ZO-2	S	395	1.20853	E	I	E	S	N	R	S	F	S	P	E	E	R	R	Q	Q	Y	SEVEDISEIESNRSFSPEERRQQYSDQDYHS	Q9Z0U1	395	14-3-3 domain binding motif;Calmodulin-dependent protein kinase II substrate motif;Casein kinase II substrate motif;ERK1,2 kinase substrate motif;GSK-3, ERK1, ERK2, CDK5 substrate motif;PKA kinase substrate motif;PKC kinase substrate motif;WW domain binding motif	SFS(1)PEER	101.64	1	NaN	-0.229146	0.514882	0.534036	0.273258	7.21165	104.2	2	466.181	-0.22351
Rtkn	Rhotekin	S	520	1.20669	P	W	G	R	P	R	T	F	S	L	D	A	A	P	A	D	H	PTWMQPLPWGRPRTFSLDAAPADHSLGPSRS	Q8C6B2	520	14-3-3 domain binding motif;Akt kinase substrate motif;Calmodulin-dependent protein kinase II substrate motif;G protein-coupled receptor kinase 1 substrate motif;MAPKAPK1 kinase substrate motif;p70 Ribosomal S6 kinase substrate motif;Phosphorylase kinase substrate motif;PKA kinase substrate motif;PKC kinase substrate motif	T(0.001)FS(0.999)LDAAPADHSLGPSR	92.993	0.998512	0.101784	-0.543783	NaN	1.25515	0.271051	7.4696	97.256	3	607.944	0.13724
Ncor2	Nuclear receptor corepressor 2	S	149	1.20592	L	A	G	K	L	E	P	V	S	P	P	S	P	P	H	A	D	DLTKDRSLAGKLEPVSPPSPPHADPELELAP	E9QPD5;F8VQL9;E9Q701;Q9WU42;E9PY55;E9Q560	149;149;149;149;149;149	Casein kinase I substrate motif;Casein kinase II substrate motif;ERK1,2 kinase substrate motif;G protein-coupled receptor kinase 1 substrate motif;GSK-3, ERK1, ERK2, CDK5 substrate motif;WW domain binding motif	LEPVS(1)PPS(1)PPHADPELELAPSR	77.847	1	0.391878	0.44869	0.13768	0.102295	0.270135	7.97051	77.847	3	832.38	-0.25441
Ncor2	Nuclear receptor corepressor 2	S	152	1.20592	K	L	E	P	V	S	P	P	S	P	P	H	A	D	P	E	L	KDRSLAGKLEPVSPPSPPHADPELELAPSRL	E9QPD5;F8VQL9;E9Q701;Q9WU42;E9PY55;E9Q560	152;152;152;152;152;152	DNA dependent Protein kinase substrate motif;ERK1,2 kinase substrate motif;G protein-coupled receptor kinase 1 substrate motif;GSK-3, ERK1, ERK2, CDK5 substrate motif;WW domain binding motif	LEPVS(1)PPS(1)PPHADPELELAPSR	77.847	1	0.391878	0.44869	0.13768	0.102295	0.270135	7.97051	77.847	3	832.38	-0.25441
Pum2	Pumilio homolog 2	S	136	1.2055	K	G	D	Q	K	G	K	A	S	P	F	E	E	D	Q	N	R	AETDGPEKGDQKGKASPFEEDQNRDLKQDDE	Q80U58;Q3UR91;Q3TQ29;E9PW51;E9Q4Q6	136;136;136;136;136	Casein kinase II substrate motif;ERK1,2 kinase substrate motif;GSK-3, ERK1, ERK2, CDK5 substrate motif;PKA kinase substrate motif;PKC kinase substrate motif;WW domain binding motif	AS(1)PFEEDQNRDLKQDDEDSK	97.5	1	0.355129	0.300065	0.305111	0.118241	0.269637	8.53221	99.844	3	816.006	-0.11149
Fam21	WASH complex subunit FAM21	S	723	1.20514	V	P	K	V	P	L	L	F	S	D	E	E	D	S	E	V	P	ATTKKESVPKVPLLFSDEEDSEVPSGVKPED	Q6PGL7;E9PY74;Q8BRP9	723;723;369	BARD1 BRCT domain binding motif;Casein kinase II substrate motif	VPLLFS(0.999)DEEDS(0.001)EVPSGVKPEDLK	112.88	0.998631	0.601506	0.212881	-0.012068	0.274494	0.269203	7.54158	125.11	3	870.414	-0.52209
Ahnak		S	5333	1.20375	S	P	E	S	D	F	G	V	S	L	K	G	P	K	V	K	G	GPSFNVASPESDFGVSLKGPKVKGGVDVSGG	E9Q616;Q8VDN3;A0PJF4;E9Q1H8;Q6UIL4;Q8BKS2;Q8CGE7	5333;701;1412;416;354;794;342	G protein-coupled receptor kinase 1 substrate motif;PKA kinase substrate motif;PKC kinase substrate motif	GPSFNVASPESDFGVS(1)LKGPK	180.7	1	0.398022	-0.807604	0.86549	0.614249	0.267539	8.72231	232.83	2	1100.52	0.46874
Sf3b1	Splicing factor 3B subunit 1	S	217	1.20374	G	A	T	P	K	K	L	S	S	W	D	Q	A	E	T	P	G	QTADQTPGATPKKLSSWDQAETPGHTPSLRW	G5E866;Q99NB9;Q3US00;Q3UIB4;A0JLN0	217;217;217;224;217	G protein-coupled receptor kinase 1 substrate motif;MDC1 BRCT domain binding motif;PKA kinase substrate motif;PKC kinase substrate motif;Plk1 PBD domain binding motif	LS(0.467)S(0.53)WDQAET(0.206)PGHT(0.699)PS(0.098)LR	64.295	0.530433	0.153935	0.0692898	0.579361	NaN	0.267529	7.35774	70.99	3	681.285	0.061715
Pdha1	Pyruvate dehydrogenase E1 component subunit alpha, somatic form, mitochondrial	S	293	1.20316	Q	T	Y	R	Y	H	G	H	S	M	S	D	P	G	V	S	Y	GPILMELQTYRYHGHSMSDPGVSYRTREEIQ	P35486;Q3UFJ3	293;293	Casein kinase II substrate motif;G protein-coupled receptor kinase 1 substrate motif;Pyruvate dehydrogenase kinase substrate motif	YHGHS(1)MSDPGVS(1)YR	142.88	0.999613	0.451752	-0.466377	0.77083	0.31113	0.266834	8.80696	166.92	2	876.815	-0.36033
Hdgfrp2	Hepatoma-derived growth factor-related protein 2	S	659	1.20311	D	H	E	R	T	R	L	A	S	E	S	A	N	D	D	N	E	KPGNERQDHERTRLASESANDDNEDS_____	Q3UMU9;D6CHX5	659;605	14-3-3 domain binding motif;Akt kinase substrate motif;Calmodulin-dependent protein kinase II substrate motif;Casein kinase II substrate motif;G protein-coupled receptor kinase 1 substrate motif;MAPKAPK1 kinase substrate motif;PKA kinase substrate motif;PKC kinase substrate motif	TRLAS(1)ES(1)ANDDNEDS	144.27	0.999998	0.283922	0.0639171	NaN	0.452471	0.26677	7.29813	144.27	2	892.306	-0.23296
Hdgfrp2	Hepatoma-derived growth factor-related protein 2	S	661	1.20311	E	R	T	R	L	A	S	E	S	A	N	D	D	N	E	D	S	GNERQDHERTRLASESANDDNEDS_______	Q3UMU9;D6CHX5	661;607	b-Adrenergic Receptor kinase substrate motif;Casein kinase II substrate motif;Pyruvate dehydrogenase kinase substrate motif	TRLAS(1)ES(1)ANDDNEDS	144.27	1	0.283922	0.0639171	NaN	0.452471	0.26677	7.29813	144.27	2	892.306	-0.23296
Sh3bp5l	SH3 domain-binding protein 5-like	S	357	1.20202	S	V	E	H	L	R	G	L	S	D	H	A	S	L	D	G	Q	SDLQKCDSVEHLRGLSDHASLDGQELGAQSR	Q99LH9;Q80TA2	357;346	14-3-3 domain binding motif;Calmodulin-dependent protein kinase II substrate motif;Casein kinase I substrate motif;G protein-coupled receptor kinase 1 substrate motif;GSK3 kinase substrate motif;PKA kinase substrate motif;PKC kinase substrate motif	GLS(0.994)DHAS(0.006)LDGQELGAQSR	89.483	0.994055	0.600746	0.44074	0.10431	-0.0839282	0.265467	7.64438	106.42	3	640.953	1.0918
40057	Septin-9	S	89	1.2007	L	S	Q	R	S	P	K	P	S	L	R	R	V	E	L	A	G	AARLVDSLSQRSPKPSLRRVELAGAKAPEPM	Q80UG5;A2A6U3	89;71	DNA dependent Protein kinase substrate motif;MAPKAPK2 kinase substrate motif;PKA kinase substrate motif;PKC kinase substrate motif	LVDS(0.002)LS(0.002)QRS(0.008)PKPS(0.989)LR	80.545	0.988695	0.226509	NaN	0.350927	0.21419	0.263875	7.45349	115.26	2	881.964	-0.12286
5031439G07Rik	Uncharacterized protein KIAA0930 homolog	S	369	1.20001	I	A	E	M	K	K	S	H	S	A	N	D	S	E	E	F	F	RKVPRNRIAEMKKSHSANDSEEFFREDDSGA	E9Q1W1;B1APX2;Q69ZV3;Q3UE31	369;367;345;324	Calmodulin-dependent protein kinase II substrate motif;Casein kinase II substrate motif;Chk1 kinase substrate motif;G protein-coupled receptor kinase 1 substrate motif;GSK3 kinase substrate motif;PKA kinase substrate motif;PKC kinase substrate motif;Pyruvate dehydrogenase kinase substrate motif	S(0.142)HS(0.733)ANDS(0.125)EEFFREDDSGADLHNATNLR	73.981	0.732946	0.272979	0.533464	0.21558	0.0301771	0.26305	7.66924	73.981	4	779.326	-0.64457
Crtc3	CREB-regulated transcription coactivator 3	S	62	1.19873	R	L	T	Q	Y	H	G	G	S	L	P	N	V	S	Q	L	R	FQKLQQLRLTQYHGGSLPNVSQLRNSAPEFQ	Q91X84	62		LT(0.014)QYHGGS(0.986)LPNVSQLR	111.01	0.986403	0.37629	-0.0515786	0.459794	NaN	0.261502	7.60143	111.01	3	617.303	0.091244
Larp1	La-related protein 1	S	525	1.1972	T	L	P	K	G	L	S	A	S	L	P	D	L	D	S	E	S	EEVSNLKTLPKGLSASLPDLDSESWIEVKKR	Q6ZQ58;Q3UU34	525;350	Casein kinase II substrate motif;Pyruvate dehydrogenase kinase substrate motif	GLS(0.001)AS(0.999)LPDLDSESWIEVK	202.95	0.999353	0.298893	0.200881	0.295305	0.243591	0.259668	8.64631	250.27	2	1013.47	0.37209
Ppp6r3	Serine/threonine-protein phosphatase 6 regulatory subunit 3	S	617	1.19679	I	Q	Q	F	D	D	G	G	S	D	E	E	D	I	W	E	E	EACCKERIQQFDDGGSDEEDIWEEKHIAFTP	G5E8R4;Q922D4	617;588	BARD1 BRCT domain binding motif;Casein kinase I substrate motif;Casein kinase II substrate motif	IQQFDDGGS(1)DEEDIWEEK	229.71	1	0.376624	-0.287043	0.474051	0.47303	0.259165	8.41367	257.2	2	1110.44	1.0029
Myl12a	Myosin regulatory light chain 12B;Myosin regulatory light polypeptide 9	T	19	1.19635	T	K	K	R	P	Q	R	A	T	S	N	V	F	A	M	F	D	KRAKTKTTKKRPQRATSNVFAMFDQSQIQEF	Q6ZWQ9;Q9CXD2;Q9D6E6;Q3THE2;A2AVY6;Q9CQ19;D3YV37;D3Z249	19;19;19;19;19;19;19;19	PKA kinase substrate motif;PKC kinase substrate motif	AT(0.981)S(0.019)NVFAMFDQSQIQEFK	216.75	0.980683	0.304277	-0.590419	0.746664	0.574025	0.258637	8.60997	298.66	3	724.322	-0.38563
Rragc	Ras-related GTP-binding protein C	S	15	1.1959	A	E	E	T	P	L	A	G	S	Y	G	A	A	D	S	F	P	_MSLQYGAEETPLAGSYGAADSFPKDFGYGV	Q99K70	15	G protein-coupled receptor kinase 1 substrate motif	SLQYGAEETPLAGS(1)YGAADSFPK	265.7	0.999999	0.369494	0.184978	0.316528	0.161395	0.258099	8.71677	265.7	2	1241.05	0.50585
Fnbp4	Formin-binding protein 4	S	487	1.19491	S	S	S	K	T	G	R	D	S	P	E	N	G	E	T	A	I	SPESTSRSSSKTGRDSPENGETAIGAEDSEK	Q6ZQ03	487	b-Adrenergic Receptor kinase substrate motif;Casein kinase II substrate motif;ERK1,2 kinase substrate motif;GSK-3, ERK1, ERK2, CDK5 substrate motif;PKA kinase substrate motif;PKC kinase substrate motif;WW domain binding motif	T(0.045)GRDS(0.953)PENGET(0.002)AIGAEDSEK	84.208	0.952888	0.326077	NaN	-0.205893	0.650521	0.256902	7.27168	84.208	3	714.966	0.24766
Plekhg5	Pleckstrin homology domain-containing family G member 5	S	962	1.19477	G	V	P	P	A	P	S	R	S	L	S	E	L	C	L	I	S	SGTPAARGVPPAPSRSLSELCLISVAPGVRT	Q66T02;B1AS68;B1AS67	962;962;949	Casein kinase II substrate motif	S(0.913)LS(0.087)ELCLISVAPGVR	186.72	0.913301	0.492622	0.206893	0.145191	0.182229	0.256734	7.31559	191.44	2	840.923	0.15691
Nrbp1	Nuclear receptor-binding protein	S	2	1.19454	_	_	_	_	_	_	_	M	S	E	G	E	S	Q	T	V	V	______________MSEGESQTVVSSGSDPK	D3YUV1;Q3TCW5;Q99J45	2;2;2	Casein kinase II substrate motif;G protein-coupled receptor kinase 1 substrate motif;GSK3 kinase substrate motif	S(1)EGESQTVVSSGSDPK	156.92	0.999921	0.468948	0.136716	0.295765	0.124409	0.25646	7.99291	208.92	2	858.354	0.16675
Stard13	StAR-related lipid transfer protein 13	S	133	1.19421	F	Q	R	K	K	G	D	D	S	D	E	E	D	L	C	I	S	SMRLDVNFQRKKGDDSDEEDLCISNKWTFQR	F8WIY7;Q923Q2	133;133	b-Adrenergic Receptor kinase substrate motif;BARD1 BRCT domain binding motif;Casein kinase II substrate motif;PKA kinase substrate motif	KKGDDS(1)DEEDLCISNK	116.86	1	0.201508	0.130008	0.399045	0.293677	0.25606	7.86065	162.46	3	644.935	-0.67163
Rbm14	RNA-binding protein 14	T	206	1.19398	F	D	G	Q	A	R	Q	P	T	P	P	F	F	G	R	D	R	FGNSTGGFDGQARQPTPPFFGRDRSPLRRSP	Q8C2Q3;E9Q205;Q3U6A2;E9QL13;Q62019;E9PXP4	206;173;173;206;205;203	Calmodulin-dependent protein kinase II substrate motif;DNA dependent Protein kinase substrate motif;GSK-3, ERK1, ERK2, CDK5 substrate motif;PKC kinase substrate motif;WW domain binding motif	QPT(1)PPFFGR	65.305	1	0.438719	0.556797	0.00244009	0.0251771	0.255783	8.06032	95.477	2	563.758	-0.4966
Rarg	Retinoic acid receptor gamma	S	451	1.19319	G	G	Q	G	K	R	G	Q	S	P	Q	P	D	Q	G	P	_	SSEDEAPGGQGKRGQSPQPDQGP________	P18911	451	14-3-3 domain binding motif;Calmodulin-dependent protein kinase II substrate motif;ERK1,2 kinase substrate motif;GSK-3, ERK1, ERK2, CDK5 substrate motif;PKA kinase substrate motif;PKC kinase substrate motif;WW domain binding motif	RGQS(1)PQPDQGP	85.45	1	0.422125	0.420401	NaN	-0.0780633	0.254821	7.23558	89.506	2	623.764	-0.82087
Nucks1	Nuclear ubiquitous casein and cyclin-dependent kinase substrate 1	S	58	1.193	S	G	K	N	S	Q	E	D	S	E	D	S	E	E	K	D	V	EAKNKRRSGKNSQEDSEDSEEKDVKTKKDDS	Q80XU3	58	b-Adrenergic Receptor kinase substrate motif;Casein kinase I substrate motif;Casein kinase II substrate motif;G protein-coupled receptor kinase 1 substrate motif;MAPKAPK2 kinase substrate motif	NSQEDS(1)EDS(1)EEKDVK	216.75	1	0.275245	0.437867	0.40947	-0.104203	0.254595	8.53624	294.37	2	949.832	0.33337
Pdxdc1	Pyridoxal-dependent decarboxylase domain-containing protein 1	S	748	1.19289	E	H	D	N	L	E	A	H	S	P	E	Q	P	P	R	A	T	EQLSSGLEHDNLEAHSPEQPPRATDLTARQT	E9Q8P7;Q99K01	748;748	Casein kinase I substrate motif;Casein kinase II substrate motif;ERK1,2 kinase substrate motif;G protein-coupled receptor kinase 1 substrate motif;GSK-3, ERK1, ERK2, CDK5 substrate motif;WW domain binding motif	VEQLSSGLEHDNLEAHS(1)PEQPPR	117.48	1	0.382391	0.306729	0.164173	0.164529	0.254455	7.90643	117.48	3	883.736	-0.59321
Tk1	Thymidine kinase;Thymidine kinase, cytosolic	S	13	1.19229	N	L	P	T	V	L	P	S	S	P	S	K	T	R	G	Q	I	___MSYINLPTVLPSSPSKTRGQIQVILGPM	B1AQK8;P04184	13;13	Casein kinase I substrate motif;Casein kinase II substrate motif;Cdc2 kinase substrate motif;CDK kinase substrate motif;CDK1,2,4,6 kinase substrate motif;ERK1,2 kinase substrate motif;G protein-coupled receptor kinase 1 substrate motif;Growth associated histone HI kinase substrate motif;GSK-3, ERK1, ERK2, CDK5 substrate motif;MDC1 BRCT domain binding motif;Plk1 PBD domain binding motif;WW domain …	S(0.001)Y(0.001)INLPT(0.024)VLPS(0.046)S(0.913)PS(0.013)KT(0.001)R	63.302	0.912884	NaN	-0.233125	0.418254	0.576067	0.253732	7.6902	186.11	3	661.338	-0.015038
Dclk1	Serine/threonine-protein kinase DCLK1	S	404	1.19219	Q	R	I	S	Q	H	G	G	S	S	T	S	L	S	S	T	K	SPGSLRKQRISQHGGSSTSLSSTKVCSSMDE	Q8CHG1;Q9JLM8;A3KN70;Q9JLM7;Q8BQN2;Q8CCN4;Q9JLM6;H7BX36;Q1EDH1	404;352;352;352;45;45;45;45;45	Casein kinase I substrate motif;Casein kinase II substrate motif	ISQHGGS(0.954)S(0.039)T(0.005)S(0.001)LSSTK	128.38	0.954152	0.425459	0.606821	NaN	-0.271426	0.253618	6.98142	128.38	2	778.851	-1.0231
Kif13b		S	1705	1.19201	T	L	G	R	L	E	V	T	S	D	S	E	D	A	S	E	V	PSNARGQTLGRLEVTSDSEDASEVPEWLREG	E9Q4K7;Q6A029	1705;672	Casein kinase I substrate motif;Casein kinase II substrate motif	LEVTS(0.998)DS(0.001)EDASEVPEWLR	170.14	0.998407	0.368936	0.380619	0.211197	0.0528201	0.253393	7.41323	170.14	2	1071.47	-0.057275
Marcks	Myristoylated alanine-rich C-kinase substrate	S	140	1.19099	E	D	G	A	A	P	S	P	S	S	E	T	P	K	K	K	K	STSSPKAEDGAAPSPSSETPKKKKKRFSFKK	P26645;Q05BL6	140;140	Casein kinase I substrate motif;Casein kinase II substrate motif;DNA dependent Protein kinase substrate motif;G protein-coupled receptor kinase 1 substrate motif	AEDGAAPS(0.136)PS(0.718)S(0.136)ET(0.01)PK	133.86	0.718229	1.0256	-0.425424	NaN	0.156322	0.252165	7.77474	149.34	2	762.317	-0.12206
Ppfibp1	Liprin-beta-1	S	435	1.18946	T	S	S	L	Q	K	S	S	S	L	G	N	L	K	K	E	A	SLSDGVSTSSLQKSSSLGNLKKEASDGTDKA	Q3U417;Q8C8U0;B2KFS3;Q3UJ84;F6S1C4;B2KFS2;B2KFS4;F6YZ95	435;435;67;435;128;67;23;23	Calmodulin-dependent protein kinase II substrate motif;Chk1 kinase substrate motif;MDC1 BRCT domain binding motif;Phosphorylase kinase substrate motif;PKA kinase substrate motif;PKC kinase substrate motif;Plk1 PBD domain binding motif	SSS(1)LGNLK	112.13	0.999812	0.295135	0.549226	-0.301939	0.458783	0.250301	7.94221	140.49	2	443.208	-0.78101
Osbpl11	Oxysterol-binding protein;Oxysterol-binding protein-related protein 11	S	200	1.18938	S	P	I	S	Q	R	R	P	S	Q	N	A	M	S	F	F	N	SLASSGNSPISQRRPSQNAMSFFNVGHSKLQ	G5E8A0;Q8CI95	200;194	14-3-3 domain binding motif;ATM kinase substrate motif;Calmodulin-dependent protein kinase II substrate motif;DNA dependent Protein kinase substrate motif;PAK2 kinase substrate motif;PKA kinase substrate motif;PKC epsilon kinase substrate motif;PKC kinase substrate motif	RPS(1)QNAMSFFNVGHSK	184.48	1	0.319502	-0.117412	0.324347	0.474412	0.250212	7.94986	190.44	3	629.617	0.20278
Synpo	Synaptopodin	S	833	1.18922	R	T	V	S	P	R	A	A	S	P	A	K	P	S	S	L	D	TSSRTPSRTVSPRAASPAKPSSLDLVPNLPR	E9Q3E2;Q8CC35;Q3U336;Q3TY32;Q3URF1;Q3TA13	833;833;594;758;594;594	14-3-3 domain binding motif;Calmodulin-dependent protein kinase II substrate motif;Cdc2 kinase substrate motif;CDK kinase substrate motif;CDK1,2,4,6 kinase substrate motif;ERK1,2 kinase substrate motif;G protein-coupled receptor kinase 1 substrate motif;GSK-3, ERK1, ERK2, CDK5 substrate motif;PKA kinase substrate motif;PKC kinase substrate motif;WW domain binding motif	AAS(1)PAKPSSLDLVPNLPR	77.53	0.999886	0.177216	0.148348	0.289281	0.385205	0.250013	7.85304	102.9	2	956.998	0.10802
Arid1b		S	1755	1.18784	E	K	I	E	S	E	G	K	S	S	P	A	L	A	A	P	D	EEEEEDSEKIESEGKSSPALAAPDASVDPKE	E9Q6R4;E9Q4N7;E9Q4N6;Q3UT39	1755;1756;1274;11	Casein kinase I substrate motif;MAPKAPK2 kinase substrate motif	S(0.5)S(0.5)PALAAPDASVDPK	117.18	0.5	0.50019	0.524465	-0.27965	NaN	0.248335	7.66175	140.46	2	753.348	-0.66308
Cobll1	Cordon-bleu protein-like 1	S	666	1.18765	S	R	E	N	H	L	T	A	S	P	G	P	D	Q	K	L	N	RMDNVKSSRENHLTASPGPDQKLNQPGVEKT	E9QPU9;Q3UMF0;B1AZ14;B1AZ15;D3Z6S2;B1AZ10;B1AZ11	666;666;634;633;616;596;595	ERK1,2 kinase substrate motif;GSK-3, ERK1, ERK2, CDK5 substrate motif;WW domain binding motif	ENHLTAS(1)PGPDQK	107.65	0.999554	NaN	-0.193932	0.365221	0.573037	0.248109	7.59169	149	2	737.322	-0.5094
Ppp2r5d		S	566	1.18749	D	K	V	L	L	R	R	K	S	E	L	P	Q	D	V	Y	T	MLKDIKKDKVLLRRKSELPQDVYTIKALEAH	Q7TNL5;Q91V89;Q99PC9;Q8K5D8	566;565;565;530	14-3-3 domain binding motif;Calmodulin-dependent protein kinase II substrate motif;Calmodulin-dependent protein kinase IV substrate motif;Chk1 kinase substrate motif;G protein-coupled receptor kinase 1 substrate motif;PAK2 kinase substrate motif;PKA kinase substrate motif;PKC epsilon kinase substrate motif;PKC kinase substrate motif	RKS(1)ELPQDVYTIK	149.52	1	0.504976	-0.0392363	0.44721	0.0787007	0.247913	8.63436	168.08	2	828.921	-0.038053
Srrm2	Serine/arginine repetitive matrix protein 2	S	434	1.18737	T	K	G	S	R	H	A	S	S	S	P	E	S	L	K	P	T	CPPSPQPTKGSRHASSSPESLKPTPAPGSRR	Q8BTI8	434	Casein kinase I substrate motif;Casein kinase II substrate motif;G protein-coupled receptor kinase 1 substrate motif;GSK3 kinase substrate motif;MDC1 BRCT domain binding motif;Plk1 PBD domain binding motif	HAS(0.648)S(0.702)S(0.649)PES(0.001)LKPTPAPGSR	73.294	0.702106	NaN	0.132379	0.323859	0.287061	0.247766	7.20919	90.308	3	655.954	0.43767
Usp10	Ubiquitin carboxyl-terminal hydrolase 10	S	570	1.18715	E	L	E	D	T	G	K	G	S	E	D	E	W	E	Q	V	G	SDLIEDEELEDTGKGSEDEWEQVGPKNKTSI	P52479	570	BARD1 BRCT domain binding motif;Casein kinase II substrate motif;G protein-coupled receptor kinase 1 substrate motif;PKA kinase substrate motif;PKC kinase substrate motif	SDLIEDEELEDTGKGS(1)EDEWEQVGPK	138.28	0.999996	0.243791	0.42503	0.166827	0.154345	0.247498	8.51499	191.22	3	1005.43	-0.21718
Kiaa0754	Uncharacterized protein KIAA0754	S	606	1.18711	P	T	D	F	Q	R	R	S	S	E	S	E	V	L	S	L	H	NGAPAQFPTDFQRRSSESEVLSLHLLAGELR	Q69ZZ9	606	14-3-3 domain binding motif;Calmodulin-dependent protein kinase I substrate motif;Calmodulin-dependent protein kinase II substrate motif;Calmodulin-dependent protein kinase IV substrate motif;Casein kinase II substrate motif;G protein-coupled receptor kinase 1 substrate motif;MDC1 BRCT domain binding motif;PAK2 kinase substrate motif;PKA kinase substrate motif;PKC epsilon kinase substrate motif;P…	RS(0.001)S(0.996)ES(0.002)EVLSLHLLAGELR	208.43	0.99648	0.314174	0.273098	0.0871509	0.315415	0.24746	8.02592	208.43	3	692.688	0.043198
Prkra	Interferon-inducible double stranded RNA-dependent protein kinase activator A	S	18	1.18691	A	P	P	L	Q	R	E	D	S	G	T	F	S	L	G	K	M	HSRHRAEAPPLQREDSGTFSLGKMITAKPGK	A2ATI5;Q9WTX2	18;18	14-3-3 domain binding motif;b-Adrenergic Receptor kinase substrate motif;Calmodulin-dependent protein kinase II substrate motif;Calmodulin-dependent protein kinase IV substrate motif;Casein kinase I substrate motif;Casein kinase II substrate motif;Chk1 kinase substrate motif;G protein-coupled receptor kinase 1 substrate motif;GSK3 kinase substrate motif;PKA kinase substrate motif;PKC epsilon kina…	AEAPPLQREDS(0.967)GT(0.032)FS(0.001)LGK	52.541	0.967059	0.288181	0.347212	0.230059	0.123402	0.247214	8.28026	108.37	2	991.965	0.43588
Kank2	KN motif and ankyrin repeat domain-containing protein 2	S	173	1.18674	G	L	L	P	P	T	P	R	S	S	G	L	S	T	P	V	A	TSSLAGVGLLPPTPRSSGLSTPVAPSAGHLA	Q8BX02	173	G protein-coupled receptor kinase 1 substrate motif;GSK3 kinase substrate motif	S(0.514)S(0.514)GLS(0.486)T(0.486)PVAPSAGHLAHVR	73.208	0.513744	0.342441	-0.202721	0.601299	NaN	0.247006	6.96244	73.464	3	668.642	0.080628
Srrm2	Serine/arginine repetitive matrix protein 2	S	2360	1.18599	P	L	M	L	D	R	A	R	S	R	T	P	P	S	A	P	S	RVSGRTSPLMLDRARSRTPPSAPSQSRMTSE	Q8BTI8	2360	14-3-3 domain binding motif;Calmodulin-dependent protein kinase II substrate motif;Calmodulin-dependent protein kinase IV substrate motif;Casein kinase II substrate motif;Chk1 kinase substrate motif;G protein-coupled receptor kinase 1 substrate motif;PKA kinase substrate motif;PKC kinase substrate motif	ARS(1)RT(1)PPSAPSQSR	104.16	0.999999	0.22848	0.482538	0.0702241	0.20312	0.246091	8.81964	160.5	3	553.245	0.32624
Top2b	DNA topoisomerase 2-beta	S	1453	1.1859	E	D	D	S	A	K	F	D	S	N	E	E	D	T	A	S	V	PSYSQKSEDDSAKFDSNEEDTASVFAPSFGL	Q64511;F6XX57	1453;327	b-Adrenergic Receptor kinase substrate motif;Casein kinase II substrate motif;PKA kinase substrate motif;PKC kinase substrate motif	FDS(1)NEEDTASVFAPSFGLK	232.02	1	0.252052	0.271187	0.286744	0.17397	0.245988	8.17064	255.58	2	1070.96	-0.48403
Vcpip1	Deubiquitinating protein VCIP135	S	1021	1.18437	E	A	T	T	R	S	R	E	S	S	P	S	H	G	L	L	K	AVSQVRAEATTRSRESSPSHGLLKLGSGGVV	F6ZDG3;Q80T83;Q8CDG3	1021;1021;996	b-Adrenergic Receptor kinase substrate motif;Casein kinase I substrate motif;Casein kinase II substrate motif;PKA kinase substrate motif;PKC kinase substrate motif	S(0.104)RES(0.9)S(0.9)PS(0.095)HGLLK	39.517	0.900431	0.241108	0.306146	0.310522	0.118727	0.244126	7.48783	99.663	3	486.544	-0.14865
Hsf1	Heat shock factor protein 1	S	314	1.18376	H	S	P	R	V	L	E	A	S	P	G	R	P	S	S	M	D	QEPPSPPHSPRVLEASPGRPSSMDTPLSPTA	P38532;Q52L52	314;314	Cdc2 kinase substrate motif;CDK kinase substrate motif;CDK1,2,4,6 kinase substrate motif;ERK1,2 kinase substrate motif;G protein-coupled receptor kinase 1 substrate motif;GSK-3, ERK1, ERK2, CDK5 substrate motif;WW domain binding motif	VLEAS(1)PGRPSSMDTPLSPTAFIDSILR	147.8	0.999863	NaN	0.131326	0.309842	0.288963	0.243377	7.41559	159.59	3	985.151	0.29527
Pdcl3	Phosducin-like protein 3	S	65	1.18366	L	E	E	N	E	D	E	F	S	E	E	D	E	R	A	I	E	EDMTLEELEENEDEFSEEDERAIEMYRQQRL	Q8BVF2	65	Casein kinase I substrate motif;Casein kinase II substrate motif;G protein-coupled receptor kinase 1 substrate motif;Pyruvate dehydrogenase kinase substrate motif	TYEDMTLEELEENEDEFS(1)EEDER	126.69	1	0.0423642	0.309642	0.354704	0.266299	0.243252	8.17123	149.32	3	987.706	0.048015
Cdr2l	Cerebellar degeneration-related protein 2-like	S	180	1.18285	E	D	A	F	R	L	H	S	S	S	L	E	L	G	P	R	P	CTSSRRCEDAFRLHSSSLELGPRPLEQENER	B7ZMV4;A2A6T1;B2RWR4	180;179;179	AMP-activated protein kinase substrate motif;Casein kinase II substrate motif;MDC1 BRCT domain binding motif;Plk1 PBD domain binding motif	LHS(0.111)S(0.852)S(0.037)LELGPRPLEQENER	63.681	0.851759	0.266517	0.144829	0.315468	NaN	0.242272	7.7178	90.718	3	757.697	0.08366
Ptrf	Polymerase I and transcript release factor	S	38	1.18277	E	A	R	A	T	E	E	P	S	G	T	G	S	D	E	L	I	GPEPTQGEARATEEPSGTGSDELIKSDQVNG	O54724;Q3U4N4;Q3TER0	38;38;38	Casein kinase I substrate motif;Casein kinase II substrate motif;DNA dependent Protein kinase substrate motif;G protein-coupled receptor kinase 1 substrate motif;GSK3 kinase substrate motif	ATEEPS(1)GT(0.5)GS(0.5)DELIK	195.92	0.999832	0.201885	0.387252	0.137362	NaN	0.242166	8.05308	227.4	2	847.334	0.41294
Plec	Plectin	S	4501	1.18264	S	R	A	G	S	R	R	G	S	F	D	A	T	G	S	G	F	RTGSRTGSRAGSRRGSFDATGSGFSMTFSSS	E9QMZ5;E9QN87;Q9QXS1;E9QPE8;E9QK43;E9QQ00;Q6S385;E9QL05;E9PY96;Q6S387;E9QLJ5;Q6S393;E9QKX4;Q6S392;E9Q153;Q6S388;E9QK01;Q6S390;E9Q3W4	4501;4649;4649;4644;4547;4508;4508;4506;4501;4501;4492;4492;4479;4479;4469;4469;4407;4407;4344	14-3-3 domain binding motif;Calmodulin-dependent protein kinase II substrate motif;G protein-coupled receptor kinase 1 substrate motif;MAPKAPK2 kinase substrate motif;PAK2 kinase substrate motif;PKA kinase substrate motif;PKC epsilon kinase substrate motif;PKC kinase substrate motif	RGS(0.999)FDAT(0.001)GSGFSMTFSSSSYSSSGYGR	103.73	0.999216	-0.0155346	-0.145238	0.566699	0.562112	0.242009	8.73345	143.36	3	951.72	-0.23482
Srrm1	Serine/arginine repetitive matrix protein 1	S	429	1.18211	T	R	K	S	R	V	S	V	S	P	G	R	T	S	G	K	V	TPQQSNRTRKSRVSVSPGRTSGKVTKHKGTE	E9PUK6;A2A8V9;Q52KI8;E9QKA4;A2A8V8	429;424;429;429;429	Casein kinase I substrate motif;Cdc2 kinase substrate motif;CDK kinase substrate motif;CDK1,2,4,6 kinase substrate motif;ERK1,2 kinase substrate motif;G protein-coupled receptor kinase 1 substrate motif;GSK-3, ERK1, ERK2, CDK5 substrate motif;WW domain binding motif	SRVS(1)VS(1)PGR	136.83	1	0.221073	0.234379	0.128519	0.381498	0.241367	8.85794	166.03	2	552.734	0.13967
Sdpr	Serum deprivation-response protein	S	363	1.18183	R	G	N	N	S	A	V	G	S	N	A	D	L	T	I	E	E	DAEKSARRGNNSAVGSNADLTIEEDEEEEPV	Q63918	363	Casein kinase II substrate motif;MAPKAPK2 kinase substrate motif;Pyruvate dehydrogenase kinase substrate motif	RGNNS(1)AVGS(1)NADLT(1)IEEDEEEEPVALQQAQQVR	108.19	1	0.896466	-0.200581	0.165014	0.103209	0.241027	9.36661	147.16	4	959.907	0.23834
Smarcc2	SWI/SNF complex subunit SMARCC2	S	283	1.18131	K	T	L	T	D	E	V	N	S	P	D	S	D	R	R	D	K	RRKKISAKTLTDEVNSPDSDRRDKKGGNYKK	Q6PDG5;Q3UID0	283;283	Casein kinase I substrate motif;Casein kinase II substrate motif;ERK1,2 kinase substrate motif;GSK-3, ERK1, ERK2, CDK5 substrate motif;WW domain binding motif	TLTDEVNS(1)PDSDRR	116.19	0.999703	0.320427	0.242206	0.422404	-0.0234682	0.240392	8.31519	167.29	2	842.862	0.091584
Bag3	BAG family molecular chaperone regulator 3	S	270	1.18084	E	P	R	P	L	R	A	A	S	P	F	R	S	P	V	R	G	KIQGDDWEPRPLRAASPFRSPVRGASSREGS	A6H663;Q9JLV1;Q3TAM9	270;270;270	14-3-3 domain binding motif;Calmodulin-dependent protein kinase II substrate motif;Casein kinase I substrate motif;Cdc2 kinase substrate motif;CDK kinase substrate motif;CDK1,2,4,6 kinase substrate motif;CLK1 kinase substrate motif;ERK1,2 kinase substrate motif;G protein-coupled receptor kinase 1 substrate motif;GSK3 kinase substrate motif;GSK-3, ERK1, ERK2, CDK5 substrate motif;PKA kinase substr…	AAS(1)PFRS(1)PVR	90.707	1	-0.0398739	-0.496773	0.673969	0.821942	0.239816	8.74345	133.48	2	624.27	-0.35772
Aarsd1	Alanyl-tRNA editing protein Aarsd1	S	540	1.18055	L	Q	D	Y	V	S	T	Q	S	A	E	E	_	_	_	_	_	RAEAQALLQDYVSTQSAEE____________	A2A4P4;A2A4P3;A2AI35;Q3THG9	540;522;409;409	Casein kinase II substrate motif	RAEAQALLQDYVSTQS(1)AEE	167.67	0.999771	-0.0606531	0.19711	0.463669	0.357733	0.239465	7.55117	167.67	2	1094.99	0.10501
Zw10	Centromere/kinetochore protein zw10 homolog	S	438	1.1805	K	E	A	L	P	D	L	P	S	P	D	A	D	H	K	L	Q	VKIGPDCKEALPDLPSPDADHKLQVQTVCKA	O54692	438	Casein kinase I substrate motif;DNA dependent Protein kinase substrate motif;ERK1,2 kinase substrate motif;GSK-3, ERK1, ERK2, CDK5 substrate motif;WW domain binding motif	EALPDLPS(1)PDADHK	41.242	1	0.275842	0.311038	0.137093	0.233634	0.239401	8.08001	175.74	3	528.903	-0.063289
Tnks1bp1	182 kDa tankyrase-1-binding protein	S	1063	1.18002	G	R	M	Q	A	E	S	Q	S	P	T	N	V	D	L	E	D	QEITRLQGRMQAESQSPTNVDLEDKEREQRG	B9EKJ7;P58871	1063;1063	Casein kinase I substrate motif;Casein kinase II substrate motif;ERK1,2 kinase substrate motif;GSK-3, ERK1, ERK2, CDK5 substrate motif;WW domain binding motif	MQAESQS(1)PTNVDLEDKER	278.75	0.999973	0.264116	0.286172	0.238987	0.165952	0.238807	8.63655	316.76	2	1078.96	0.35194
Crkl	Crk-like protein	S	107	1.17981	I	E	P	A	P	R	Y	P	S	P	P	V	G	S	V	S	A	YLDTTTLIEPAPRYPSPPVGSVSAPNLPTAE	A2RS58;P47941	107;107	14-3-3 domain binding motif;Calmodulin-dependent protein kinase II substrate motif;DNA dependent Protein kinase substrate motif;ERK1,2 kinase substrate motif;GSK-3, ERK1, ERK2, CDK5 substrate motif;PKA kinase substrate motif;PKC kinase substrate motif;WW domain binding motif	Y(0.002)PS(0.953)PPVGS(0.043)VS(0.002)APNLPTAEENLEYVR	92.822	0.952952	0.346305	0.0247452	0.34463	NaN	0.23856	7.71201	135.54	2	1383.65	-0.81214
Haus6		S	500	1.17891	L	T	Y	K	T	I	A	D	S	E	E	E	D	S	P	L	S	RTPIEKTLTYKTIADSEEEDSPLSDTAKNSQ	Q6NV99;Q69ZG0;Q6P252;Q8BP50;E9Q9R8;Q8CB73;Q8BQC6	500;443;302;281;280;124;384	b-Adrenergic Receptor kinase substrate motif;BARD1 BRCT domain binding motif;Casein kinase II substrate motif;G protein-coupled receptor kinase 1 substrate motif	TIADS(1)EEEDSPLSDTAK	241.38	1	0.0806577	0.315682	0.280247	0.273221	0.237452	7.85278	241.38	2	944.391	-0.33334
Macf1	Microtubule-actin cross-linking factor 1	S	3082	1.17885	I	P	R	P	E	R	L	N	S	Q	E	S	D	E	E	P	Q	KEPLSSEIPRPERLNSQESDEEPQISDVPHI	E9QA63;Q9QXZ0;B1ARU4;B1ARU1	3082;3082;3082;1517	14-3-3 domain binding motif;ATM kinase substrate motif;Calmodulin-dependent protein kinase II substrate motif;Casein kinase I substrate motif;Casein kinase II substrate motif;DNA dependent Protein kinase substrate motif;PKA kinase substrate motif;PKC kinase substrate motif	LNS(1)QES(1)DEEPQISDVPHISK	115.89	1	0.675184	NaN	0.542122	-0.50518	0.237375	7.65153	151.89	3	804.672	0.48067
Thrap3	Thyroid hormone receptor-associated protein 3	T	324	1.17847	P	V	G	K	S	P	P	A	T	G	S	A	Y	G	S	S	Q	LSPSKKSPVGKSPPATGSAYGSSQKEESAAS	A2AJI4;Q569Z6;Q8BZN7;Q8BV76;Q8R353	324;324;324;324;324	MAPKAPK2 kinase substrate motif	KS(1)PVGKSPPAT(0.992)GS(0.007)AYGS(0.001)SQK	239.51	0.992124	0.434455	0.245861	0.120247	0.147106	0.236917	7.53782	239.51	2	1047.47	0.43582
Arhgap5	Rho GTPase-activating protein 5	T	1218	1.17753	G	G	I	D	N	P	A	I	T	S	D	Q	E	V	D	D	K	SPVETWKGGIDNPAITSDQEVDDKKIKKKTH	B9EKC3;E9PYT0;P97393	1218;1218;1216		GGIDNPAIT(0.799)S(0.201)DQEVDDKK	187.59	0.798522	-0.138315	0.715981	0.0769345	0.28847	0.235768	8.03181	187.59	2	991.441	-0.72435
Ppan	Suppressor of SWI4 1 homolog	S	238	1.17719	L	L	A	T	G	V	G	L	S	D	S	E	V	E	P	D	G	RLQDISELLATGVGLSDSEVEPDGEHNTTEL	Q91YU8	238	Casein kinase II substrate motif	LQDIS(0.002)ELLAT(0.014)GVGLS(0.754)DS(0.114)EVEPDGEHNT(0.059)T(0.059)ELPQAVAGR	37.93	0.753595	-0.201211	1.28942	-0.382169	NaN	0.235347	7.30812	46.15	3	1309.95	0.28368
Serbp1		T	234	1.17691	T	D	L	D	Q	S	N	V	T	E	E	T	P	E	G	E	E	GTVKDELTDLDQSNVTEETPEGEEHPVADTE	Q3UEI6;Q3V274	234;234	Casein kinase I substrate motif;G protein-coupled receptor kinase 1 substrate motif	DELT(0.013)DLDQS(0.298)NVT(0.77)EET(0.917)PEGEEHPVADT(0.001)ENKENEVEEVKEEGPK	52.784	0.769943	0.290189	NaN	0.11157	0.303241	0.235	7.87905	127.28	4	1225.27	0.27727
Ranbp10	Ran-binding protein 10	S	365	1.17648	K	S	Q	D	S	Y	P	G	S	P	S	L	S	P	R	H	G	SLSSRSPKSQDSYPGSPSLSPRHGPSSSHIH	A9UGK3;Q6VN19	365;365	Casein kinase I substrate motif;Casein kinase II substrate motif;ERK1,2 kinase substrate motif;G protein-coupled receptor kinase 1 substrate motif;GSK3 kinase substrate motif;GSK-3, ERK1, ERK2, CDK5 substrate motif;MAPKAPK2 kinase substrate motif;WW domain binding motif	SQDSYPGS(0.999)PS(0.015)LS(0.985)PR	111.65	0.999078	NaN	-0.0485912	-0.206768	0.958785	0.234475	7.04485	111.65	2	819.316	0.22165
Acaca	Acetyl-CoA carboxylase 1;Biotin carboxylase	S	116	1.17605	A	F	H	M	R	S	S	M	S	G	L	H	L	V	K	Q	G	SGLQDGLAFHMRSSMSGLHLVKQGRDRKKID	E9PUB1;Q5SWU9	116;79	AMP-activated protein kinase substrate motif	SSMS(1)GLHLVK	144.47	0.999996	0.304161	0.4609	0.105721	0.0649929	0.233944	8.39839	144.47	2	569.77	-0.58498
Lrrc47	Leucine-rich repeat-containing protein 47	S	315	1.1752	R	E	R	K	Q	H	R	E	S	G	E	G	E	E	E	V	A	KEDRKKRRERKQHRESGEGEEEVADSARLML	E9PV22;B1AX98;Q505F5	315;293;293	b-Adrenergic Receptor kinase substrate motif;Casein kinase II substrate motif;PKA kinase substrate motif;PKC kinase substrate motif	KQHRES(1)GEGEEEVADSAR	111.66	1	-1.14468	0.47176	0.501974	1.10259	0.232911	7.94202	111.66	3	698.634	0.29142
Suds3	Sin3 histone deacetylase corepressor complex component SDS3	S	234	1.17457	L	K	S	P	K	R	P	A	S	P	S	S	P	E	H	L	P	DLRTLNKLKSPKRPASPSSPEHLPATPAESP	Q8BR65	234	14-3-3 domain binding motif;Calmodulin-dependent protein kinase II substrate motif;Casein kinase I substrate motif;Casein kinase II substrate motif;ERK1,2 kinase substrate motif;G protein-coupled receptor kinase 1 substrate motif;GSK-3, ERK1, ERK2, CDK5 substrate motif;PKA kinase substrate motif;PKC kinase substrate motif;WW domain binding motif	RPAS(0.995)PS(0.559)S(0.446)PEHLPATPAESPAQR	124.31	0.994941	0.238909	0.305095	0.199769	0.184752	0.232131	8.41086	124.31	3	815.032	-0.60481
Strn3	Striatin-3	S	257	1.17407	N	F	L	E	N	A	D	D	S	D	E	E	E	N	D	M	I	GDVLETFNFLENADDSDEEENDMIEGIPEGK	Q9ERG2;B2RQS1;Q3UTR6;B3STQ1	257;257;257;257	b-Adrenergic Receptor kinase substrate motif;BARD1 BRCT domain binding motif;Casein kinase II substrate motif	RPPGDVLETFNFLENADDS(1)DEEENDMIEGIPEGKDK	140.9	1	0.322274	-0.0426351	0.343238	0.303205	0.231521	8.71645	161.49	4	1040.95	-0.3881
Flnc	Filamin-C	S	2234	1.17387	F	L	G	R	E	R	L	G	S	F	G	S	I	T	R	Q	Q	FPAVFGDFLGRERLGSFGSITRQQEGEASSQ	D3Z576;Q8VHX6;D3YW87;Q3UXJ8	2234;2234;2201;282	14-3-3 domain binding motif;Akt kinase substrate motif;Calmodulin-dependent protein kinase II substrate motif;Casein kinase I substrate motif;Casein kinase II substrate motif;MAPKAPK1 kinase substrate motif;PKA kinase substrate motif;PKC kinase substrate motif	LGS(1)FGSITR	134.08	1	-0.188266	-0.830152	0.845546	1.09795	0.231269	9.16355	134.49	2	509.242	0.82154
Tnks1bp1	182 kDa tankyrase-1-binding protein	S	1061	1.17374	L	Q	G	R	M	Q	A	E	S	Q	S	P	T	N	V	D	L	SSQEITRLQGRMQAESQSPTNVDLEDKEREQ	B9EKJ7;P58871	1061;1061	ATM kinase substrate motif;b-Adrenergic Receptor kinase substrate motif;Casein kinase II substrate motif;DNA dependent Protein kinase substrate motif;G protein-coupled receptor kinase 1 substrate motif	MQAES(0.986)QS(0.014)PTNVDLEDKER	123.83	0.985834	0.244765	NaN	0.212317	0.236248	0.23111	8.17099	283.55	3	724.975	-0.29112
Arhgef7	Rho guanine nucleotide exchange factor 7	S	673	1.17272	K	R	K	P	E	R	K	P	S	D	E	E	F	A	V	R	K	TMKKLLPKRKPERKPSDEEFAVRKSTAALEE	Q9ES28;D3Z0V2	673;441	14-3-3 domain binding motif;BARD1 BRCT domain binding motif;Calmodulin-dependent protein kinase II substrate motif;Casein kinase II substrate motif;DNA dependent Protein kinase substrate motif;PKA kinase substrate motif;PKA, PKG kinase substrate motif;PKC epsilon kinase substrate motif;PKC kinase substrate motif;PKG kinase substrate motif	KPS(1)DEEFAVR	92.65	1	NaN	0.378401	-0.385044	0.696237	0.229864	7.23447	92.65	2	629.279	-0.67919
Aebp2	Zinc finger protein AEBP2	S	199	1.17187	A	T	S	G	G	R	R	G	S	L	E	M	S	S	D	G	E	TGGGGSSATSGGRRGSLEMSSDGEPLSRMDS	E9Q7B4;Q9Z248;F8WGQ1	199;199;22	14-3-3 domain binding motif;Aurora-A kinase substrate motif;Calmodulin-dependent protein kinase II substrate motif;Casein kinase II substrate motif;G protein-coupled receptor kinase 1 substrate motif;GSK3 kinase substrate motif;PAK2 kinase substrate motif;Phosphorylase kinase substrate motif;PKA kinase substrate motif;PKC epsilon kinase substrate motif;PKC kinase substrate motif	RGS(1)LEMSSDGEPLSR	73.294	0.999845	NaN	-0.0135672	0.259893	0.440107	0.228811	7.19562	92.897	2	850.869	0.28998
Dbr1	Lariat debranching enzyme	S	520	1.17113	A	K	F	P	L	K	R	L	S	D	E	H	E	P	E	Q	R	SGDEKDLAKFPLKRLSDEHEPEQRKKIKRRN	Q923B1;Q8BP51	520;75	Casein kinase II substrate motif;PAK2 kinase substrate motif;PKA kinase substrate motif;PKC kinase substrate motif	RLS(1)DEHEPEQR	74.678	1	0.412402	0.177216	0.35888	-0.0368901	0.227902	7.70754	171.08	3	492.547	-0.11317
Add1	Alpha-adducin	T	614	1.1691	A	V	P	N	T	P	P	S	T	P	V	K	L	E	E	D	L	KSPPDQSAVPNTPPSTPVKLEEDLPQEPTSR	Q9QYC0;Q8K232;F8WGR0;F8WHZ9;E9Q1K3;F6RDR0	614;614;645;645;643;142	Cdc2 kinase substrate motif;CDK1,2,4,6 kinase substrate motif;CDK5 kinase substrate motif;ERK1,2 kinase substrate motif;Growth associated histone HI kinase substrate motif;GSK3, Erk1, Erk2 and CDK5 kinase motif;GSK-3, ERK1, ERK2, CDK5 substrate motif;MDC1 BRCT domain binding motif;Plk1 PBD domain binding motif;WW domain binding motif	SPPDQSAVPNT(0.284)PPS(0.858)T(0.858)PVKLEEDLPQEPTSR	96.317	0.857765	0.189666	-0.0455356	0.489463	0.268017	0.225403	7.85375	114.2	3	1125.18	0.21109
Tcof1	Treacle protein	S	1227	1.16893	K	K	S	Q	K	R	K	L	S	G	D	L	E	A	G	A	P	EAIKESGKKSQKRKLSGDLEAGAPKNKKKKE	H3BL37;O08784;E9PYV2;Q05BH6;Q7TPZ2	1227;1191;1143;1137;1227	14-3-3 domain binding motif;Calmodulin-dependent protein kinase II substrate motif;Pim1 kinase substrate sequence;PKA kinase substrate motif;PKC epsilon kinase substrate motif;PKC kinase substrate motif	LS(1)GDLEAGAPK	94.717	1	0.187894	0.205643	0.271635	0.235569	0.225185	8.6176	132.51	2	569.263	-0.21773
Sh3gl1	Endophilin-A2	S	288	1.16815	A	P	K	I	T	A	S	S	S	F	R	S	S	D	K	P	I	GGFPCAPAPKITASSSFRSSDKPIRMPSKSM	Q3TJB4;Q3TRJ7;Q3U3C4;Q62419	288;288;288;288	Casein kinase I substrate motif;Casein kinase II substrate motif;G protein-coupled receptor kinase 1 substrate motif;GSK3 kinase substrate motif;MDC1 BRCT domain binding motif;PKA kinase substrate motif;PKC kinase substrate motif;Plk1 PBD domain binding motif	ITASS(0.014)S(0.985)FR	109.29	0.98544	0.699374	-0.692315	0.157303	0.732548	0.224227	8.06543	157.78	2	474.713	-0.12969
Sqstm1	Sequestosome-1	T	271	1.16799	G	K	R	S	R	L	T	P	T	T	P	E	S	S	S	T	G	DIDVEHGGKRSRLTPTTPESSSTGTEDKSNT	Q64337;D3YZJ1	271;271	Casein kinase II substrate motif;DNA dependent Protein kinase substrate motif;G protein-coupled receptor kinase 1 substrate motif	SRLT(0.005)PT(0.995)T(0.001)PESSSTGTEDK	181.61	0.994635	0.0154976	1.02892	-0.0712136	-0.0771063	0.224025	8.48309	257.75	2	987.439	0.058042
Sirt1	NAD-dependent protein deacetylase sirtuin-1;SirtT1 75 kDa fragment	S	16	1.16775	A	L	Q	A	A	G	S	P	S	A	A	A	A	M	E	A	A	MADEVALALQAAGSPSAAAAMEAASQPADEP	Q53Z05;Q923E4;Q3UNI1;Q3USJ2	16;16;16;16	DNA dependent Protein kinase substrate motif;G protein-coupled receptor kinase 1 substrate motif	ADEVALALQAAGS(0.176)PS(0.824)AAAAMEAASQPADEPLR	170.1	0.824169	-0.0989999	0.266877	0.488552	0.238493	0.223731	7.74614	170.1	3	1067.83	-0.79827
Suds3	Sin3 histone deacetylase corepressor complex component SDS3	S	236	1.16775	S	P	K	R	P	A	S	P	S	S	P	E	H	L	P	A	T	RTLNKLKSPKRPASPSSPEHLPATPAESPAQ	Q8BR65	236	Casein kinase II substrate motif;DNA dependent Protein kinase substrate motif	RPAS(0.82)PS(0.82)S(0.359)PEHLPATPAESPAQR	99.273	0.820264	0.229834	0.296193	0.206928	0.16196	0.223729	8.36532	124.31	3	815.032	-0.37688
Pcyt1a	Choline-phosphate cytidylyltransferase A	S	343	1.16767	R	W	P	F	S	G	K	T	S	P	S	S	S	P	A	S	L	RSPSPSFRWPFSGKTSPSSSPASLSRCRAVT	P49586	343	Casein kinase I substrate motif;Casein kinase II substrate motif;ERK1,2 kinase substrate motif;G protein-coupled receptor kinase 1 substrate motif;GSK3 kinase substrate motif;GSK-3, ERK1, ERK2, CDK5 substrate motif;MAPKAPK2 kinase substrate motif;PKA kinase substrate motif;PKC kinase substrate motif;WW domain binding motif	T(0.932)S(0.939)PS(0.069)S(0.033)S(0.027)PASLSR	75.739	0.938523	0.438506	0.104203	0.271896	0.0799048	0.223627	7.74968	105.17	2	668.763	-0.46735
Pcyt1a	Choline-phosphate cytidylyltransferase A	T	342	1.16767	F	R	W	P	F	S	G	K	T	S	P	S	S	S	P	A	S	ERSPSPSFRWPFSGKTSPSSSPASLSRCRAV	P49586	342	Casein kinase I substrate motif;Casein kinase II substrate motif;G protein-coupled receptor kinase 1 substrate motif	T(0.932)S(0.939)PS(0.069)S(0.033)S(0.027)PASLSR	75.739	0.932486	0.438506	0.104203	0.271896	0.0799048	0.223627	7.5717	105.17	2	668.763	-0.46735
Nfkb2	Nuclear factor NF-kappa-B p100 subunit;Nuclear factor NF-kappa-B p52 subunit	T	425	1.16758	G	E	G	A	E	E	P	R	T	P	P	E	A	P	Q	G	E	SRRDTDAGEGAEEPRTPPEAPQGEPQALDTL	Q4U105;Q3UG25;Q3ULT8;Q3UV15;Q9WTK5;Q3U5V4;E9Q1H6;Q4U108	425;425;425;425;425;331;425;425	Casein kinase I substrate motif;Casein kinase II substrate motif;ERK1,2 kinase substrate motif;G protein-coupled receptor kinase 1 substrate motif;Growth associated histone HI kinase substrate motif;GSK3, Erk1, Erk2 and CDK5 kinase motif;GSK-3, ERK1, ERK2, CDK5 substrate motif;WW domain binding motif	DTDAGEGAEEPRT(1)PPEAPQGEPQALDTLQR	168.06	1	0.197362	-0.166276	0.623354	0.239634	0.223519	7.95916	168.06	3	1085.82	0.36791
Vcpip1	Deubiquitinating protein VCIP135	S	1018	1.16725	V	R	A	E	A	T	T	R	S	R	E	S	S	P	S	H	G	VKEAVSQVRAEATTRSRESSPSHGLLKLGSG	F6ZDG3;Q80T83;Q8CDG3	1018;1018;993	Casein kinase I substrate motif;Casein kinase II substrate motif;G protein-coupled receptor kinase 1 substrate motif;GSK3 kinase substrate motif	S(0.965)RES(0.203)S(0.483)PS(0.349)HGLLK	37.913	0.964834	0.287827	0.037312	0.355775	0.211548	0.223115	7.52889	99.663	3	486.544	-0.27135
Hirip3	HIRA-interacting protein 3	S	575	1.16655	E	T	Y	R	R	T	L	D	S	E	E	E	Q	P	R	Q	A	GEGTSPGETYRRTLDSEEEQPRQAPPDWSHM	Q8BLH7	575	b-Adrenergic Receptor kinase substrate motif;BARD1 BRCT domain binding motif;Casein kinase II substrate motif;G protein-coupled receptor kinase 1 substrate motif	TLDS(1)EEEQPR	158.11	1	0.674913	0.113967	-0.0173518	0.117459	0.222247	8.19282	168.76	2	642.261	-0.61596
Mprip	Myosin phosphatase Rho-interacting protein	S	1015	1.1665	Q	L	R	N	I	R	S	K	S	V	I	E	Q	V	S	W	D	DRSCVTRQLRNIRSKSVIEQVSWDN______	P97434;F6RND9;Q5SWZ6;F6XZM9;Q5SWZ8	1015;1001;1001;489;488	14-3-3 domain binding motif;Calmodulin-dependent protein kinase II substrate motif;Casein kinase II substrate motif;MAPKAPK2 kinase substrate motif;Phosphorylase kinase substrate motif;PKA kinase substrate motif;PKC kinase substrate motif	S(0.006)KS(0.994)VIEQVSWDN	183.31	0.994059	0.257614	-0.1849	0.392289	0.42372	0.222181	7.90614	197.14	2	736.327	-0.057834
Srrm2	Serine/arginine repetitive matrix protein 2	S	2073	1.16592	R	M	S	C	F	S	R	P	S	M	S	P	T	P	L	D	R	PVALSSSRMSCFSRPSMSPTPLDRCRSPGML	Q8BTI8	2073	Casein kinase II substrate motif;DNA dependent Protein kinase substrate motif;G protein-coupled receptor kinase 1 substrate motif;PKA kinase substrate motif;PKC kinase substrate motif	MSCFSRPS(1)MS(0.997)PT(0.003)PLDR	121.46	0.999703	0.0666747	0.430607	0.192876	0.195715	0.221468	8.53377	147.9	3	682.262	-0.4449
Lats1	Serine/threonine-protein kinase LATS1	S	463	1.16591	P	N	I	P	V	R	S	N	S	F	N	N	P	L	G	S	R	HEIPTWQPNIPVRSNSFNNPLGSRASHSANS	Q8BYR2	463	14-3-3 domain binding motif;Calmodulin-dependent protein kinase II substrate motif;G protein-coupled receptor kinase 1 substrate motif;PKA kinase substrate motif;PKC kinase substrate motif	SNS(1)FNNPLGSR	161.04	0.999928	0.304861	-0.384188	0.510704	0.454427	0.221451	7.42004	165.49	2	636.772	-0.096023
Baz1a	Bromodomain adjacent to zinc finger domain protein 1A	T	729	1.16274	K	D	L	D	P	D	V	V	T	E	D	E	D	D	P	G	S	ENKNIEQKDLDPDVVTEDEDDPGSHKRSRRG	G3UWZ0;Q6P1D9;O88379	729;69;732	Casein kinase I substrate motif;Casein kinase II substrate motif;G protein-coupled receptor kinase 1 substrate motif	DLDPDVVT(1)EDEDDPGSHKR	69.979	0.999999	-0.0652495	0.209765	0.163526	0.562091	0.217533	8.22492	77.562	3	740.309	0.14148
Phldb1	Pleckstrin homology-like domain family B member 1	S	522	1.16223	R	G	R	R	T	R	S	P	S	P	T	L	G	E	S	L	A	FSLTLGARGRRTRSPSPTLGESLAPRKGSFS	D3Z0X5;D3Z4N0;Q6PDH0;E9PWB1;F6RUK9;F6RYD0	522;522;522;522;267;15	14-3-3 domain binding motif;Akt kinase substrate motif;Calmodulin-dependent protein kinase II substrate motif;Casein kinase II substrate motif;DNA dependent Protein kinase substrate motif;ERK1,2 kinase substrate motif;GSK-3, ERK1, ERK2, CDK5 substrate motif;MAPKAPK1 kinase substrate motif;PKA kinase substrate motif;PKC kinase substrate motif;WW domain binding motif	T(0.009)RS(0.991)PS(0.993)PT(0.007)LGESLAPR	151.42	0.992745	0.249263	-0.0429323	0.269025	0.392232	0.216897	7.8176	151.42	2	864.89	-1.0551
Lrrfip1	Leucine-rich repeat flightless-interacting protein 1	S	84	1.16201	L	A	S	L	G	G	T	S	S	R	R	G	S	G	D	T	S	PSLSAATLASLGGTSSRRGSGDTSISMDTEA	Q3UZ39;A6H5U5;E9Q2D5;E9Q9T1;G5E8E1;Q8BLV4;Q8BLM1	84;267;267;184;94;92;192	G protein-coupled receptor kinase 1 substrate motif;GSK3 kinase substrate motif;MDC1 BRCT domain binding motif;PKA kinase substrate motif;PKC kinase substrate motif;Plk1 PBD domain binding motif	NMPSLSAATLASLGGTS(0.013)S(0.987)R	235.76	0.987241	0.0346383	-0.501075	0.352087	0.980853	0.216626	7.7304	276.96	2	950.945	-0.02927
Ptma	Prothymosin alpha;Thymosin alpha	S	63	1.16049	G	P	P	A	C	P	T	M	S	D	A	A	V	D	T	S	S	NSLTRGIGPPACPTMSDAAVDTSSEITTKDL	Q3UA54;Q3U8X6;Q8C2T3;Q3U6E4;P26350;Q0VGU2	63;62;62;2;2;2		S(1)DAAVDTSSEITTK	230.97	1	0.218967	0.209516	0.150929	0.279511	0.214731	8.45515	258.16	2	773.83	0.20199
Eif4enif1	Eukaryotic translation initiation factor 4E transporter	S	586	1.15939	D	Y	L	H	P	R	I	P	S	P	I	G	F	P	S	G	P	RTQAASADYLHPRIPSPIGFPSGPQQLLGDP	Q9EST3;Q5NBZ5;Q8BY82;A8Y5K6;Q8BTX7;Q5NBZ4	586;562;562;411;362;144	14-3-3 domain binding motif;Calmodulin-dependent protein kinase II substrate motif;DNA dependent Protein kinase substrate motif;ERK1,2 kinase substrate motif;GSK-3, ERK1, ERK2, CDK5 substrate motif;PKA kinase substrate motif;PKC kinase substrate motif;WW domain binding motif	IPS(1)PIGFPSGPQQLLGDPFQGMR	133.21	0.999906	NaN	0.198243	0.205231	0.236622	0.213365	7.48993	170.06	3	845.742	0.52439
Ahnak		S	5101	1.15909	G	D	L	G	A	S	S	P	S	M	K	L	H	A	P	G	L	LKGPSLKGDLGASSPSMKLHAPGLDLKGVGG	E9Q616;Q8VDN3;A0PJF4;E9Q1H8;Q6UIL4;Q8BKS2;Q8CGE7	5101;469;1180;184;122;562;110	DNA dependent Protein kinase substrate motif;PKA kinase substrate motif;PKC kinase substrate motif	GDLGASS(0.001)PS(0.999)MK	117.08	0.998958	0.346191	-0.721064	0.648756	0.578112	0.212999	8.29561	124.51	2	573.231	-0.18574
Specc1	Cytospin-B	S	914	1.15896	D	P	Y	L	R	K	S	P	S	L	E	S	L	S	R	P	P	RAEDRKSDPYLRKSPSLESLSRPPSLGFGNT	Q5SXY1	914	AMP-activated protein kinase substrate motif;Calmodulin-dependent protein kinase II substrate motif;Casein kinase I substrate motif;Casein kinase II substrate motif;Chk1 kinase substrate motif;DNA dependent Protein kinase substrate motif;Phosphorylase kinase substrate motif;PKA kinase substrate motif;PKC kinase substrate motif	KS(0.007)PS(0.987)LES(0.005)LS(0.001)RPPSLGFGNTR	60.764	0.987008	0.130008	-0.159444	0.434442	0.446305	0.212828	8.09121	71.558	3	737.37	0.31692
Nop56	Nucleolar protein 56	S	543	1.15883	A	S	E	P	E	E	A	A	S	P	T	T	P	K	K	K	R	SSPKEEVASEPEEAASPTTPKKKRKFSEEPE	A2APD6;Q9D6Z1;A2APD7;Q3UJZ7	543;543;259;543	Casein kinase I substrate motif;Casein kinase II substrate motif;ERK1,2 kinase substrate motif;G protein-coupled receptor kinase 1 substrate motif;GSK-3, ERK1, ERK2, CDK5 substrate motif;WW domain binding motif	EEVAS(1)EPEEAAS(1)PTTPK	232.29	0.999944	0.066537	0.664665	0.204482	-0.0850168	0.212667	9.15682	246.9	2	966.382	0.36804
Tmf1	TATA element modulatory factor	S	340	1.15862	S	R	S	V	S	E	I	N	S	D	D	E	L	P	G	K	G	FSVQSLDSRSVSEINSDDELPGKGYALVPII	B9EKI3;D6RJK7	340;340	BARD1 BRCT domain binding motif;Casein kinase I substrate motif;Casein kinase II substrate motif;MAPKAPK2 kinase substrate motif	SVSEINS(1)DDELPGK	157.11	1	0.24123	0.571046	-0.0697022	0.107042	0.212404	7.96826	168.08	2	785.338	-0.5052
Wwc2	Protein WWC2	T	999	1.1584	N	S	V	I	V	R	S	Q	T	F	S	P	G	E	R	S	Q	RQHPFVRNSVIVRSQTFSPGERSQYICRLNR	Q6NXJ0	999	Calmodulin-dependent protein kinase II alpha substrate motif;Calmodulin-dependent protein kinase II substrate motif;Calmodulin-dependent protein kinase IV substrate motif;Chk1 kinase substrate motif;PKC kinase substrate motif	SQT(1)FSPGER	100.93	0.999891	-0.105225	-0.248896	0.796786	0.405872	0.212134	7.5492	112.5	2	544.724	-0.062918
Prkra	Interferon-inducible double stranded RNA-dependent protein kinase activator A	T	20	1.15802	P	L	Q	R	E	D	S	G	T	F	S	L	G	K	M	I	T	RHRAEAPPLQREDSGTFSLGKMITAKPGKTP	A2ATI5;Q9WTX2	20;20	Casein kinase I substrate motif	EDS(0.013)GT(0.985)FS(0.002)LGK	86.114	0.985018	NaN	0.307778	0.254702	0.0724828	0.211654	7.89664	111.63	2	560.732	-0.041993
Pcyt1a	Choline-phosphate cytidylyltransferase A	S	347	1.15801	S	G	K	T	S	P	S	S	S	P	A	S	L	S	R	C	R	PSFRWPFSGKTSPSSSPASLSRCRAVTCDIS	P49586	347	Casein kinase I substrate motif;Casein kinase II substrate motif;ERK1,2 kinase substrate motif;GSK-3, ERK1, ERK2, CDK5 substrate motif;MAPKAPK2 kinase substrate motif;MDC1 BRCT domain binding motif;Plk1 PBD domain binding motif;WW domain binding motif	T(0.5)S(0.5)PSS(0.016)S(0.964)PAS(0.02)LSR	102.62	0.963525	0.420509	0.152638	NaN	0.061812	0.211653	7.73924	102.62	2	668.763	-0.34663
Suds3	Sin3 histone deacetylase corepressor complex component SDS3	S	237	1.15773	P	K	R	P	A	S	P	S	S	P	E	H	L	P	A	T	P	TLNKLKSPKRPASPSSPEHLPATPAESPAQR	Q8BR65	237	Casein kinase II substrate motif;ERK1,2 kinase substrate motif;GSK-3, ERK1, ERK2, CDK5 substrate motif;MDC1 BRCT domain binding motif;Plk1 PBD domain binding motif;WW domain binding motif	RPAS(0.406)PS(0.673)S(0.903)PEHLPAT(0.018)PAESPAQR	59.687	0.902736	0.166715	0.296193	0.220345	0.16196	0.211303	8.36682	113.86	3	815.032	0.0012035
Map3k7	Mitogen-activated protein kinase kinase kinase 7	S	439	1.15769	G	N	G	Q	P	R	R	R	S	I	Q	D	L	T	V	T	G	VPEIVISGNGQPRRRSIQDLTVTGTEPGQVS	Q923A8;Q3TXG1;Q543B5;Q62073;A2AP92;A2AP93	439;412;412;412;439;412	14-3-3 domain binding motif;Aurora-A kinase substrate motif;Calmodulin-dependent protein kinase II substrate motif;Casein kinase II substrate motif;PAK2 kinase substrate motif;Phosphorylase kinase substrate motif;PKA kinase substrate motif;PKC epsilon kinase substrate motif;PKC kinase substrate motif;Pyruvate dehydrogenase kinase substrate motif	RRS(1)IQDLTVTGTEPGQVSSR	173.87	1	0.223546	0.0385766	0.421593	0.161266	0.211245	8.39886	179.17	3	756.376	0.56623
Nfic	Nuclear factor 1 C-type;Nuclear factor 1	S	333	1.15744	V	K	K	T	E	M	D	K	S	P	F	N	S	P	S	P	Q	EGGISSPVKKTEMDKSPFNSPSPQDSPRLSS	P70255;Q3UHA6	333;333	Casein kinase I substrate motif;ERK1,2 kinase substrate motif;G protein-coupled receptor kinase 1 substrate motif;Growth associated histone HI kinase substrate motif;GSK3 kinase substrate motif;GSK-3, ERK1, ERK2, CDK5 substrate motif;WW domain binding motif	TEMDKS(1)PFNSPSPQDSPR	124.31	0.999764	0.0746424	-0.0315774	0.468451	0.332244	0.21094	8.18161	142.39	3	705.961	-0.043101
Zdhhc5	Palmitoyltransferase ZDHHC5	S	554	1.15737	E	R	E	K	L	L	R	Q	S	P	P	L	A	G	R	E	E	HIVASLQEREKLLRQSPPLAGREEEPGLGDS	Q8VDZ4;E9QQ92	554;554	ERK1,2 kinase substrate motif;G protein-coupled receptor kinase 1 substrate motif;GSK-3, ERK1, ERK2, CDK5 substrate motif;PKA kinase substrate motif;PKC kinase substrate motif;WW domain binding motif	LLRQS(1)PPLAGREEEPGLGDSGIQSTPGSGHAPR	75.703	0.999815	0.0258793	NaN	0.924782	-0.318114	0.210849	7.98193	75.703	4	862.426	0.29239
Srrm2	Serine/arginine repetitive matrix protein 2	S	435	1.15726	K	G	S	R	H	A	S	S	S	P	E	S	L	K	P	T	P	PPSPQPTKGSRHASSSPESLKPTPAPGSRRE	Q8BTI8	435	Casein kinase I substrate motif;Casein kinase II substrate motif;ERK1,2 kinase substrate motif;GSK-3, ERK1, ERK2, CDK5 substrate motif;MDC1 BRCT domain binding motif;Plk1 PBD domain binding motif;WW domain binding motif	HAS(0.837)S(0.294)S(0.857)PES(0.012)LKPTPAPGSR	89.462	0.856844	NaN	0.132379	0.323859	0.175908	0.210716	7.27545	90.308	3	655.954	-0.00068288
L3mbtl3	Lethal(3)malignant brain tumor-like protein 3	S	605	1.15686	P	D	R	L	S	G	D	T	S	P	P	T	T	P	S	F	P	LSKERIFPDRLSGDTSPPTTPSFPRSKRMDT	Q8BLB7;Q8BMN8	605;127	Casein kinase I substrate motif;Casein kinase II substrate motif;ERK1,2 kinase substrate motif;G protein-coupled receptor kinase 1 substrate motif;GSK-3, ERK1, ERK2, CDK5 substrate motif;MAPKAPK2 kinase substrate motif;WW domain binding motif	LSGDT(0.005)S(0.994)PPTTPSFPR	138.66	0.994407	-0.0640726	1.07793	0.0789293	-0.251931	0.210213	7.51591	168.64	2	820.372	-0.16073
Cit	Citron Rho-interacting kinase	S	2051	1.1568	M	L	S	T	R	R	E	R	S	P	G	R	L	F	E	D	S	REKSPGRMLSTRRERSPGRLFEDSSRGRLPA	E9QPY8;D3YU89;E9QL53;P49025;D3Z1U0;E9QPZ0;F6SBR5	2051;2036;2021;2021;1994;1979;1608	14-3-3 domain binding motif;Calmodulin-dependent protein kinase II substrate motif;Cdc2 kinase substrate motif;CDK kinase substrate motif;CDK1,2,4,6 kinase substrate motif;CLK1 kinase substrate motif;ERK1,2 kinase substrate motif;Growth associated histone HI kinase substrate motif;GSK-3, ERK1, ERK2, CDK5 substrate motif;PKA kinase substrate motif;PKC epsilon kinase substrate motif;PKC kinase subs…	ERS(1)PGRLFEDSSR	58.32	0.999727	0.350724	0.0738203	0.177196	0.238817	0.210139	7.68303	62.924	3	539.246	0.065519
Bclaf1	Bcl-2-associated transcription factor 1	S	494	1.15674	I	T	V	K	K	E	V	Q	S	P	E	Q	V	K	S	E	K	EDKGSDRITVKKEVQSPEQVKSEKLKELFDY	Q8K019;F8WI22;Q3UDL9;Q3UR37;H7BX81;Q3TSZ0	494;494;494;492;494;494	Casein kinase I substrate motif;Casein kinase II substrate motif;ERK1,2 kinase substrate motif;GSK-3, ERK1, ERK2, CDK5 substrate motif;PKA kinase substrate motif;WW domain binding motif	KEVQS(1)PEQVK	207.52	1	0.262072	0.157561	0.307019	0.113598	0.210063	8.58674	212.11	2	626.303	0.4221
Eif3j	Eukaryotic translation initiation factor 3 subunit J	S	18	1.15623	A	A	A	A	G	D	S	D	S	W	D	A	D	T	F	S	M	AAAAAAAAAAAGDSDSWDADTFSMEDPVRKV	Q66JS6	18	b-Adrenergic Receptor kinase substrate motif;Casein kinase I substrate motif	AAAAAAAAAAAAGDS(0.007)DS(0.993)WDADTFSMEDPVRK	164.69	0.992762	0.305329	0.327917	0.014995	0.189483	0.209431	8.65703	216.44	3	1050.11	-0.35066
Ablim1	Actin-binding LIM protein 1	S	475	1.15602	L	G	E	S	P	R	T	L	S	P	T	P	S	A	E	G	Y	DKQERQSLGESPRTLSPTPSAEGYQDVRDRM	E9QK41;Q8K4G5;E9Q9C2;E9Q9C1;B9EIV0;E9Q9C9;E9Q9C0;E9Q9C8;E9Q9C4;E9Q1E8;E9Q9C7;Q3UP03;E9Q030;E9Q9D2;E9Q9D1;E9Q9Q7;Q3TAG5	475;475;431;396;431;431;368;355;383;355;355;355;159;143;115;89;354	14-3-3 domain binding motif;Calmodulin-dependent protein kinase II substrate motif;Casein kinase I substrate motif;Casein kinase II substrate motif;ERK1,2 kinase substrate motif;G protein-coupled receptor kinase 1 substrate motif;GSK3 kinase substrate motif;GSK-3, ERK1, ERK2, CDK5 substrate motif;PKA kinase substrate motif;PKC kinase substrate motif;WW domain binding motif	T(0.002)LS(0.998)PTPSAEGYQDVR	190.86	0.997781	0.206393	0.275961	0.113411	0.240878	0.209161	8.20322	190.86	2	850.88	-0.19054
Rfc1	Replication factor C subunit 1	S	379	1.15592	S	P	T	K	R	E	S	V	S	P	E	D	S	E	K	K	R	TPKKTKVSPTKRESVSPEDSEKKRTNYQAYR	G3UXL4;Q5U4B1;G3X8Z6;P35601;G3UWX1;E9PX26;Q3UJT6;Q61944	379;365;365;365;365;365;365;307	Casein kinase I substrate motif;Casein kinase II substrate motif;ERK1,2 kinase substrate motif;G protein-coupled receptor kinase 1 substrate motif;GSK3 kinase substrate motif;GSK-3, ERK1, ERK2, CDK5 substrate motif;Pyruvate dehydrogenase kinase substrate motif;WW domain binding motif	RES(1)VS(1)PEDSEK	130.29	0.999995	NaN	0.464773	0.0602619	0.102078	0.209038	7.31288	134.76	2	711.763	-0.42704
Dkc1	H/ACA ribonucleoprotein complex subunit 4	S	455	1.15581	R	K	R	D	S	E	S	E	S	D	E	T	P	T	V	P	Q	EAVNVIKRKRDSESESDETPTVPQLKEKKKK	Q3TI79;Q499D4;Q9ESX5	455;455;455	b-Adrenergic Receptor kinase substrate motif;Casein kinase I substrate motif;Casein kinase II substrate motif;G protein-coupled receptor kinase 1 substrate motif;MAPKAPK2 kinase substrate motif	KRDS(0.648)ES(0.362)ES(0.989)DETPTVPQLK	157.8	0.989466	0.168257	0.134615	0.180103	0.352658	0.208908	8.25305	157.8	3	735.982	-0.35847
Pdxdc1	Pyridoxal-dependent decarboxylase domain-containing protein 1	T	687	1.15567	H	K	V	Q	G	T	G	V	T	P	P	P	T	P	L	G	T	STEYTYVHKVQGTGVTPPPTPLGTRSKQRLP	E9Q8P7;Q99K01	687;687	G protein-coupled receptor kinase 1 substrate motif;GSK-3, ERK1, ERK2, CDK5 substrate motif;WW domain binding motif	VQGTGVT(1)PPPTPLGTR	215.62	1	0.432211	0.20364	0.229755	-0.0306892	0.208729	8.54388	299.43	2	829.419	0.061919
Eif2s2	Eukaryotic translation initiation factor 2 subunit 2	S	105	1.15556	A	I	K	D	V	K	I	E	S	D	A	Q	E	P	A	E	P	DIDEAEEAIKDVKIESDAQEPAEPEDDLDIM	Q3ULL5;Q99L45	105;105	b-Adrenergic Receptor kinase substrate motif;PKA kinase substrate motif;PKC kinase substrate motif	IFDIDEAEEAIKDVKIES(1)DAQEPAEPEDDLDIMLGNK	33.358	1	0.268075	0.407081	0.0710271	0.0881627	0.208586	8.06692	133.29	4	1060.99	0.60086
Arid1a	AT-rich interactive domain-containing protein 1A	S	697	1.15545	H	L	P	G	I	R	G	P	S	P	S	P	V	G	S	P	A	FSPHTSPHLPGIRGPSPSPVGSPASVAQSRS	E9QAQ7;A2BH40;A2BH41;A2BH37;A2BH38	697;697;452;312;312	14-3-3 domain binding motif;AMP-activated protein kinase substrate motif;Calmodulin-dependent protein kinase II substrate motif;Casein kinase II substrate motif;DNA dependent Protein kinase substrate motif;ERK1,2 kinase substrate motif;GSK-3, ERK1, ERK2, CDK5 substrate motif;HMGCoA Reductase kinase substrate motif;PKA kinase substrate motif;PKC kinase substrate motif;WW domain binding motif	GPS(1)PSPVGSPASVAQSR	204.63	0.999976	0.823912	0.426104	-0.178874	-0.237319	0.208456	7.68187	204.63	2	830.888	-0.67132
Ddx3x	ATP-dependent RNA helicase DDX3X	S	90	1.15513	S	S	F	F	G	D	R	G	S	G	S	R	G	R	F	D	D	RGDSRGKSSFFGDRGSGSRGRFDDRGRGDYD	B7ZWF1;Q3TQX5;Q62167;B9EKE9	89;90;90;90	Casein kinase I substrate motif;Casein kinase II substrate motif;PKA kinase substrate motif;PKC kinase substrate motif	SSFFGDRGS(1)GSR	103.14	0.999749	0.224287	NaN	0.300893	0.0989845	0.208055	7.6507	103.14	2	670.275	-0.39591
Bin1	Myc box-dependent-interacting protein 1	S	324	1.15511	E	P	E	P	A	S	G	A	S	P	G	A	T	I	P	K	S	PEIRVNHEPEPASGASPGATIPKSPSQLRKG	O08539;Q6P1B9	324;293	Casein kinase I substrate motif;ERK1,2 kinase substrate motif;G protein-coupled receptor kinase 1 substrate motif;GSK-3, ERK1, ERK2, CDK5 substrate motif;WW domain binding motif	VNHEPEPASGAS(1)PGATIPK	120.32	0.999865	0.501719	0.101919	0.260428	-0.0319598	0.208027	8.32226	186.13	3	646.97	-0.011594
Smn1	Survival motor neuron protein	T	22	1.15405	D	T	V	L	F	R	R	G	T	G	Q	S	D	D	S	D	I	GAGSEQEDTVLFRRGTGQSDDSDIWDDTALI	P97801;Q3UMN7;Q549F9;Q5PXT3	22;22;22;22	Calmodulin-dependent protein kinase II substrate motif;Calmodulin-dependent protein kinase IV substrate motif;Casein kinase I substrate motif;Casein kinase II substrate motif;Chk1 kinase substrate motif;PAK2 kinase substrate motif;PKA kinase substrate motif;PKC kinase substrate motif	RGT(0.925)GQS(0.536)DDS(0.537)DIWDDT(0.001)ALIK	56.851	0.924977	0.251083	0.397036	-0.0280033	NaN	0.206705	7.55152	83.758	3	751.642	0.25988
Map7d1	MAP7 domain-containing protein 1	S	401	1.15401	R	R	K	P	G	A	G	G	S	P	A	L	A	R	R	R	L	PSGERPERRKPGAGGSPALARRRLEATPVQK	A2AJI0;A8Y5P4;A2AJI1;F6WF36;A2AJH9	401;369;329;146;145	ERK1,2 kinase substrate motif;G protein-coupled receptor kinase 1 substrate motif;GSK-3, ERK1, ERK2, CDK5 substrate motif;WW domain binding motif	RKPGAGGS(1)PALAR	118.55	1	0.400101	-0.2601	0.399788	0.286814	0.206651	8.06028	132.08	3	439.898	0.35456
Clasp1	CLIP-associating protein 1	S	636	1.15333	A	L	P	P	G	S	Y	A	S	L	G	R	I	R	T	R	R	PAFSSAAALPPGSYASLGRIRTRRQSSGSTT	E9QKH0;B2RY22;Q80TV8;E9QNY9;A5D6Q8	636;636;636;636;636		VSSSSGSPAFSSAAALPPGS(0.001)YAS(0.999)LGR	104.97	0.999207	-0.612439	-0.40173	0.747972	1.08942	0.205806	7.99622	107.13	2	1246.08	-0.9911
40057	Septin-9	S	80	1.1529	E	P	A	A	R	L	V	D	S	L	S	Q	R	S	P	K	P	DLGVKNSEPAARLVDSLSQRSPKPSLRRVEL	Q80UG5;A2A6U3	80;62	b-Adrenergic Receptor kinase substrate motif;Casein kinase II substrate motif	LVDS(0.966)LS(0.029)QRS(0.005)PKPSLR	70.889	0.966033	NaN	-0.219488	0.446659	0.38862	0.205264	8.50391	91.475	3	588.312	0.56813
Eef1g	Elongation factor 1-gamma	T	46	1.15286	F	H	F	G	Q	T	N	R	T	P	E	F	L	R	K	F	P	VLSAPPHFHFGQTNRTPEFLRKFPAGKVPAF	Q4FZK2;Q9D8N0	46;46	Growth associated histone HI kinase substrate motif;GSK-3, ERK1, ERK2, CDK5 substrate motif;WW domain binding motif	VLS(0.007)APPHFHFGQT(0.049)NRT(0.944)PEFLR	43.162	0.944383	0.063641	0.159242	NaN	0.392781	0.205221	7.64051	62.203	4	633.564	-0.01024
Pak3	Serine/threonine-protein kinase PAK 3	S	207	1.15264	E	P	P	L	A	P	P	V	S	E	E	E	D	E	E	E	E	SNTKTASEPPLAPPVSEEEDEEEEEEEDDNE	B1GX81;B1GX80;A3KGC0;Q61036;A3KGC1;A3KGC5	207;192;186;186;171;207	BARD1 BRCT domain binding motif;Casein kinase II substrate motif;G protein-coupled receptor kinase 1 substrate motif	TASEPPLAPPVS(1)EEEDEEEEEEEDDNEPPPVIAPRPEHTK	60.459	0.99957	0.773321	0.570074	-0.337654	-0.185993	0.204937	8.12339	65.577	4	1136.75	0.22905
40057	Septin-9	S	85	1.15228	L	V	D	S	L	S	Q	R	S	P	K	P	S	L	R	R	V	NSEPAARLVDSLSQRSPKPSLRRVELAGAKA	Q80UG5;A2A6U3	85;67	Casein kinase I substrate motif;ERK1,2 kinase substrate motif;G protein-coupled receptor kinase 1 substrate motif;Growth associated histone HI kinase substrate motif;GSK3 kinase substrate motif;GSK-3, ERK1, ERK2, CDK5 substrate motif;PKA kinase substrate motif;PKC kinase substrate motif;WW domain binding motif	S(1)PKPSLR	109.11	0.999998	0.190299	-0.187756	0.484994	0.330429	0.204491	8.95918	127.56	2	432.721	0.096479
Lmna	Prelamin-A/C;Lamin-A/C	T	19	1.15128	R	S	G	A	Q	A	S	S	T	P	L	S	P	T	R	I	T	PSQRRATRSGAQASSTPLSPTRITRLQEKED	B3RH23;P48678;Q3U733;B3RH24;Q3U7I5;Q3UCU3;D3YUF7	19;19;87;19;19;19;19	Casein kinase I substrate motif;Casein kinase II substrate motif;G protein-coupled receptor kinase 1 substrate motif;GSK-3, ERK1, ERK2, CDK5 substrate motif;MDC1 BRCT domain binding motif;Plk1 PBD domain binding motif;WW domain binding motif	SGAQASS(0.001)T(0.999)PLS(0.975)PT(0.025)R	171.79	0.999415	-0.0767367	0.171847	0.418003	0.299844	0.203239	7.83904	187.39	2	760.313	0.06335
Nsfl1c	NSFL1 cofactor p47	S	142	1.15126	V	A	V	E	R	V	T	K	S	P	G	E	T	S	K	P	R	GAKEHGAVAVERVTKSPGETSKPRPFAGGGY	Q3UVN5;Q9CZ44;Q3KQQ1	142;140;139	Casein kinase I substrate motif;Casein kinase II substrate motif;ERK1,2 kinase substrate motif;G protein-coupled receptor kinase 1 substrate motif;Growth associated histone HI kinase substrate motif;GSK-3, ERK1, ERK2, CDK5 substrate motif;WW domain binding motif	S(0.973)PGET(0.011)S(0.003)KPRPFAGGGY(0.013)R	40.349	0.973294	0.198494	0.216238	0.0571215	0.340989	0.203211	7.83371	73.834	3	615.288	-0.7934
Prkar2b	cAMP-dependent protein kinase type II-beta regulatory subunit	S	112	1.15062	I	N	R	F	T	R	R	A	S	V	C	A	E	A	Y	N	P	GAFNAPVINRFTRRASVCAEAYNPDEEEDDA	P31324	112	14-3-3 domain binding motif;Aurora-A kinase substrate motif;Calmodulin-dependent protein kinase II alpha substrate motif;Calmodulin-dependent protein kinase II substrate motif;Calmodulin-dependent protein kinase IV substrate motif;PAK2 kinase substrate motif;Phosphorylase kinase substrate motif;PKA kinase substrate motif;PKC epsilon kinase substrate motif;PKC kinase substrate motif	RAS(1)VCAEAYNPDEEEDDAESR	175.59	1	0.248413	0.016211	0.39155	0.153495	0.202417	9.21693	225.48	2	1246.98	-0.20757
Kif1b	Kinesin-like protein KIF1B	S	1659	1.15062	P	E	A	N	S	R	A	S	S	P	C	Q	E	F	E	Q	F	SSMDQKTPEANSRASSPCQEFEQFQIVPTVE	A2AH79;Q60575;A2AH78;F6XNB6;A2AH74;E9Q744	1659;1659;1613;338;337;14	14-3-3 domain binding motif;Calmodulin-dependent protein kinase II substrate motif;ERK1,2 kinase substrate motif;GSK-3, ERK1, ERK2, CDK5 substrate motif;MAPKAPK2 kinase substrate motif;MDC1 BRCT domain binding motif;PKA kinase substrate motif;PKC kinase substrate motif;Plk1 PBD domain binding motif;WW domain binding motif	AS(0.165)S(0.835)PCQEFEQFQIVPTVETPYLAR	79.445	0.835126	0.23217	0.264476	0.0270427	0.28597	0.202415	7.33189	86.557	3	959.777	-0.1937
Smarcc2	SWI/SNF complex subunit SMARCC2	S	306	1.15052	K	R	K	R	S	P	S	P	S	P	T	P	E	A	K	K	K	KKGGNYKKRKRSPSPSPTPEAKKKNAKKGPS	Q6PDG5;Q3UID0	306;306	Casein kinase II substrate motif;DNA dependent Protein kinase substrate motif;ERK1,2 kinase substrate motif;GSK-3, ERK1, ERK2, CDK5 substrate motif;MAPKAPK2 kinase substrate motif;WW domain binding motif	KRS(0.019)PS(0.997)PS(0.983)PTPEAK	170.11	0.983177	0.33182	0.44297	0.0772998	-0.0429245	0.202291	8.34357	209.23	2	771.342	0.46876
Srrm1	Serine/arginine repetitive matrix protein 1	S	463	1.15002	P	R	K	V	E	L	S	E	S	E	E	D	K	G	S	K	M	SPSPAPKPRKVELSESEEDKGSKMAAADSVQ	E9PUK6;A2A8V9;Q52KI8;E9QKA4;A2A8V8	463;458;463;463;463	b-Adrenergic Receptor kinase substrate motif;Casein kinase II substrate motif;G protein-coupled receptor kinase 1 substrate motif;Pyruvate dehydrogenase kinase substrate motif	KVELS(1)ES(1)EEDKGSK	226.44	0.999998	0.194087	0.265677	0.148225	0.198659	0.201662	8.98409	226.44	2	862.855	0.49949
Mcm2	DNA replication licensing factor MCM2	S	140	1.14938	R	R	G	L	L	Y	D	S	S	E	E	D	E	E	R	P	A	GRGLGRMRRGLLYDSSEEDEERPARKRRHVE	Q3UJN1;P97310;Q3UK39	140;140;140	Casein kinase II substrate motif;G protein-coupled receptor kinase 1 substrate motif;MDC1 BRCT domain binding motif;Plk1 PBD domain binding motif;Pyruvate dehydrogenase kinase substrate motif	GLLYDS(1)S(1)EEDEERPAR	213.5	1	0.0377336	0.10608	0.14693	0.512699	0.200861	8.69868	257.72	2	1013.4	-0.076915
Srrm2	Serine/arginine repetitive matrix protein 2	S	2052	1.14916	T	P	P	A	T	R	N	H	S	G	S	R	T	P	P	V	A	SDRSRSATPPATRNHSGSRTPPVALSSSRMS	Q8BTI8	2052	14-3-3 domain binding motif;Calmodulin-dependent protein kinase II substrate motif;Casein kinase II substrate motif;CLK1 kinase substrate motif;G protein-coupled receptor kinase 1 substrate motif;PKA kinase substrate motif;PKC kinase substrate motif	NHS(1)GS(1)RT(1)PPVALSSSR	101.36	1	-0.138362	0.285698	0.330121	0.324871	0.200582	8.77691	132.86	3	631.587	-0.075382
Ahnak		S	5325	1.14877	K	G	P	S	F	N	V	A	S	P	E	S	D	F	G	V	S	AVPDIGVKGPSFNVASPESDFGVSLKGPKVK	E9Q616;Q8VDN3;A0PJF4;E9Q1H8;Q6UIL4;Q8BKS2;Q8CGE7	5325;693;1404;408;346;786;334	Casein kinase I substrate motif;Casein kinase II substrate motif;ERK1,2 kinase substrate motif;GSK-3, ERK1, ERK2, CDK5 substrate motif;WW domain binding motif	GPSFNVAS(1)PESDFGVSLK	187.16	0.999993	0.532167	0.640436	-0.00187428	-0.370388	0.200085	7.53324	196.78	2	959.435	-0.048953
Ubap2l	Ubiquitin-associated protein 2-like	S	628	1.14852	R	R	Y	P	S	S	I	S	S	S	P	Q	K	D	L	T	Q	EQRSTQTRRYPSSISSSPQKDLTQAKNGFSS	Q80X50;E9Q9Q3;Q8BJ53;Q812D5;Q812D4;E9PZA1;Q3TSB0;Q80U73	628;608;608;608;608;104;12;129	MAPKAPK2 kinase substrate motif;MDC1 BRCT domain binding motif;Plk1 PBD domain binding motif	RYPSSIS(0.083)S(0.774)S(0.143)PQK	98.942	0.77369	0.25882	-0.0518776	-0.385707	0.977867	0.199776	8.02816	143.91	2	708.83	-1.1848
Ccnl1	Cyclin-L1	S	347	1.14814	G	F	S	P	A	S	K	P	S	S	P	R	E	V	K	A	E	PALSTLGGFSPASKPSSPREVKAEEKSPVSI	Q52KE7	347	DNA dependent Protein kinase substrate motif;PKA kinase substrate motif;PKC kinase substrate motif	GLNLDGTPALS(0.011)T(0.011)LGGFS(0.129)PAS(0.841)KPS(0.669)S(0.34)PR	98.684	0.668556	-0.0788684	NaN	0.289122	0.387638	0.199297	7.59275	116.35	3	896.421	0.39888
Tp53bp1	Tumor suppressor p53-binding protein 1	S	1447	1.14802	S	S	T	L	R	R	S	D	S	P	E	I	P	F	Q	A	A	TKRTDASSSTLRRSDSPEIPFQAATGSSDGL	P70399;A2AU91;A2AU89;E9QL34;Q8C0U1;Q3V1P7;Q8BZ87	1447;1459;1409;1404;236;179;103	14-3-3 domain binding motif;b-Adrenergic Receptor kinase substrate motif;Calmodulin-dependent protein kinase II substrate motif;Calmodulin-dependent protein kinase IV substrate motif;Casein kinase II substrate motif;Chk1 kinase substrate motif;ERK1,2 kinase substrate motif;G protein-coupled receptor kinase 1 substrate motif;GSK-3, ERK1, ERK2, CDK5 substrate motif;PKA kinase substrate motif;PKC ki…	S(0.044)DS(0.955)PEIPFQAATGSSDGLDSSSSGNSFVGLR	112.64	0.955227	0.118626	0.304161	0.15711	0.216686	0.199145	8.44333	171.05	3	1051.46	-1.2257
Denr	Density-regulated protein	S	73	1.14728	F	A	K	L	T	V	E	N	S	P	K	Q	E	T	G	I	T	EKNFPNEFAKLTVENSPKQETGITEGQGPVG	Q9CQJ6;E9Q0G1	73;73	ERK1,2 kinase substrate motif;Growth associated histone HI kinase substrate motif;GSK-3, ERK1, ERK2, CDK5 substrate motif;PKA kinase substrate motif;PKC kinase substrate motif;WW domain binding motif	LT(0.009)VENS(0.936)PKQET(0.055)GITEGQGPVGEEEEK	156.23	0.936376	0.345396	NaN	0.160169	0.0890985	0.198221	7.66175	172.42	3	955.773	0.16901
Tnks1bp1	182 kDa tankyrase-1-binding protein	S	1375	1.14645	D	P	K	S	S	G	S	L	S	P	G	L	E	T	E	D	P	VGPDLELDPKSSGSLSPGLETEDPLEARELG	B9EKJ7;P58871	1375;1375	ERK1,2 kinase substrate motif;GSK-3, ERK1, ERK2, CDK5 substrate motif;MAPKAPK2 kinase substrate motif;WW domain binding motif	SSGSLS(1)PGLETEDPLEAR	276.08	0.99991	-0.0725738	0.0578315	-0.0576928	0.861107	0.197168	8.21447	284.48	2	962.93	0.23173
Cald1		S	496	1.14613	R	I	N	E	W	L	T	K	S	P	D	G	N	K	S	P	A	LKVGVSSRINEWLTKSPDGNKSPAPKPSDLR	E9QA16;Q8VCQ8;E9QA15;D3Z6I7;E9Q0M9;Q3UGC3	496;490;728;514;494;347	ERK1,2 kinase substrate motif;Growth associated histone HI kinase substrate motif;GSK-3, ERK1, ERK2, CDK5 substrate motif;WW domain binding motif	INEWLTKS(1)PDGNK	134.49	1	0.0817487	-0.151474	0.5425	0.314284	0.196765	8.24398	194.19	3	527.915	0.21421
Scaf1	Splicing factor, arginine/serine-rich 19	S	691	1.14591	P	K	R	E	V	L	Y	D	S	E	G	L	S	A	D	E	R	SPAPAVSPKREVLYDSEGLSADERGGKSDKD	Q5U4C3	691	b-Adrenergic Receptor kinase substrate motif;G protein-coupled receptor kinase 1 substrate motif;GSK3 kinase substrate motif	REVLYDS(1)EGLS(1)ADER	171.5	1	0.145482	0.571822	-0.0524158	0.121079	0.196492	8.00381	171.5	2	949.882	0.52944
Rptor	Regulatory-associated protein of mTOR	S	722	1.14584	T	P	R	L	R	S	V	S	S	Y	G	N	I	R	A	V	T	PVRDSPCTPRLRSVSSYGNIRAVTTARNLNK	A2ACM0;Q8K4Q0;A4FUW1	722;722;720	AMP-activated protein kinase substrate motif;MDC1 BRCT domain binding motif;Plk1 PBD domain binding motif	SVSS(1)YGNIR	138.99	0.999615	0.257856	0.327917	0.0648269	0.135047	0.196412	7.63503	145.09	2	531.734	0.43752
Pard3	Partitioning defective 3 homolog	S	144	1.14554	M	P	L	H	V	R	R	S	S	D	P	A	L	T	G	L	S	PSVLRANMPLHVRRSSDPALTGLSTSVSDNN	A5D6P2;G3XA13;Q99NH2;F6S7Z1;B2RUK1;E0CXL4;E0CY24;E0CZ83;E0CZE2;E0CXR8;F6TSJ9;E0CX45;F6UGU7;B7ZNY3;E9PYJ2;Q8BPQ4;Q8BPQ6	144;144;144;164;144;144;144;144;144;144;147;144;120;144;144;144;124	14-3-3 domain binding motif;AMP-activated protein kinase substrate motif;Calmodulin-dependent protein kinase II substrate motif;HMGCoA Reductase kinase substrate motif;MDC1 BRCT domain binding motif;PAK2 kinase substrate motif;PKA kinase substrate motif;PKA, PKG kinase substrate motif;PKC epsilon kinase substrate motif;PKC kinase substrate motif;PKG kinase substrate motif;Plk1 PBD domain binding …	RS(0.117)S(0.882)DPALTGLSTSVSDNNFSSEEPSR	146.64	0.882122	NaN	-0.175077	0.636907	0.12625	0.196027	7.73824	149.74	3	940.749	-1.0994
Phldb2	Pleckstrin homology-like domain family B member 2	S	976	1.14517	P	E	F	Y	S	R	T	A	S	E	S	N	V	Y	L	N	S	SEGQRQKPEFYSRTASESNVYLNSFHYPDRS	Q8K1N2;D3Z069;F6QU68;F8WJ06;Q8BZE3	976;1021;292;292;292	14-3-3 domain binding motif;Calmodulin-dependent protein kinase II substrate motif;Calmodulin-dependent protein kinase IV substrate motif;Casein kinase II substrate motif;G protein-coupled receptor kinase 1 substrate motif;MAPKAPK2 kinase substrate motif;PKA kinase substrate motif;PKC kinase substrate motif	T(0.035)AS(0.96)ES(0.004)NVYLNSFHYPDR	133.74	0.960396	NaN	-0.0274397	0.191508	0.422617	0.195562	7.82481	210.38	2	1040.44	-0.15661
Epb4.1l3		S	571	1.14513	E	W	E	K	R	L	S	T	S	P	V	R	L	A	A	R	Q	TETALTNEWEKRLSTSPVRLAARQEDAPMIE	A7YY80;F8WH44;D0VYV6;E9QN88	589;759;583;571	Cdc2 kinase substrate motif;CDK kinase substrate motif;CDK1,2,4,6 kinase substrate motif;ERK1,2 kinase substrate motif;Growth associated histone HI kinase substrate motif;GSK-3, ERK1, ERK2, CDK5 substrate motif;WW domain binding motif	LST(0.006)S(0.994)PVR	84.615	0.993659	0.355693	-0.413596	0.751829	0.0881166	0.195511	7.8447	92.838	2	420.205	0.96421
Specc1	Cytospin-B	S	912	1.14503	K	S	D	P	Y	L	R	K	S	P	S	L	E	S	L	S	R	KGRAEDRKSDPYLRKSPSLESLSRPPSLGFG	Q5SXY1	912	Casein kinase II substrate motif;ERK1,2 kinase substrate motif;Growth associated histone HI kinase substrate motif;GSK-3, ERK1, ERK2, CDK5 substrate motif;PKA kinase substrate motif;PKC kinase substrate motif;WW domain binding motif	KS(0.514)PS(0.386)LES(0.081)LS(0.019)RPPSLGFGNTR	52.814	0.514435	0.164786	-0.147586	0.568944	NaN	0.195382	7.52662	68.567	3	737.37	-0.040065
Sf3b1	Splicing factor 3B subunit 1	T	227	1.14467	D	Q	A	E	T	P	G	H	T	P	S	L	R	W	D	E	T	PKKLSSWDQAETPGHTPSLRWDETPGRAKGS	G5E866;Q99NB9;Q3US00;Q3UIB4;A0JLN0	227;227;227;234;227	GSK-3, ERK1, ERK2, CDK5 substrate motif;WW domain binding motif	LSSWDQAET(1)PGHT(0.999)PS(0.001)LR	115.06	0.998908	0.236217	0.0692898	0.282474	0.191722	0.194926	7.73891	115.06	3	681.285	0.05484
Ptges3	Prostaglandin E synthase 3	S	100	1.14432	E	R	A	K	L	N	W	L	S	V	D	F	N	N	W	K	D	SWPRLTKERAKLNWLSVDFNNWKDWEDDSDE	Q3TJG6;Q9R0Q7;E9PXA6	100;100;100		LNWLS(0.991)VDFNNWKDWEDDS(0.009)DEDMSNFDR	72.805	0.991234	0.207268	0.122076	0.418948	0.029647	0.194485	7.67385	72.805	3	1158.13	0.015017
Epb4.1l2	Band 4.1-like protein 2	T	35	1.14365	A	K	E	V	E	N	E	Q	T	P	V	S	E	P	E	E	E	ADASKEKAKEVENEQTPVSEPEEEKGSQPGP	Q80UE5;B6ZHC5;Q80UE4;B6ZHC7;B6ZHD0;G3X9B8;Q3UNQ6;Q80UE3;O70318;G3X991;Q8C928;B6ZHC6;Q811B2;Q8CGJ6	35;35;35;35;35;35;35;35;35;35;27;35;35;35	Casein kinase I substrate motif;Casein kinase II substrate motif;GSK-3, ERK1, ERK2, CDK5 substrate motif;WW domain binding motif	AKEVENEQT(0.548)PVS(0.451)EPEEEKGSQPGPPVER	78.159	0.548489	0.333195	0.0743684	0.216082	0.150914	0.19364	8.02107	88.571	3	1052.82	0.059954
Gm20459	A-kinase anchor protein 2	S	984	1.14342	R	S	R	K	Q	R	T	L	S	M	I	E	E	E	I	R	A	MVGPFKLRSRKQRTLSMIEEEIRAAQEREEE	F7AA26;A2APJ0;B1AWV2;A2APJ5;A2API8;O54931;Q69ZV5;A2APJ2;Q8C9L6;Q99L95;F8WH21	984;983;983;819;781;740;777;740;740;744;735	14-3-3 domain binding motif;Akt kinase substrate motif;Calmodulin-dependent protein kinase II substrate motif;Casein kinase II substrate motif;MAPKAPK1 kinase substrate motif;p70 Ribosomal S6 kinase substrate motif;PKA kinase substrate motif;PKC kinase substrate motif	TLS(1)MIEEEIR	137.62	0.999979	0.106616	-0.367508	0.601102	0.433214	0.193356	7.93279	170.66	2	658.794	-0.059132
Rab11fip1	Rab11 family-interacting protein 1	S	204	1.14338	P	S	V	T	P	S	V	D	S	D	D	E	S	F	S	K	D	DTASAIVPSVTPSVDSDDESFSKDKKKKSKI	E9Q8L9;Q9D620	204;204	b-Adrenergic Receptor kinase substrate motif;BARD1 BRCT domain binding motif;Casein kinase I substrate motif;Casein kinase II substrate motif;G protein-coupled receptor kinase 1 substrate motif;GSK3 kinase substrate motif	DSASDTASAIVPSVTPS(0.161)VDS(0.77)DDES(0.035)FS(0.035)KDK	113.42	0.769577	-0.0392066	1.16806	-0.351628	-0.0040339	0.193299	7.83447	130.49	3	1013.11	-0.23017
Srrm2	Serine/arginine repetitive matrix protein 2	T	2362	1.143	M	L	D	R	A	R	S	R	T	P	P	S	A	P	S	Q	S	SGRTSPLMLDRARSRTPPSAPSQSRMTSERE	Q8BTI8	2362	14-3-3 domain binding motif;Akt kinase substrate motif;Calmodulin-dependent protein kinase II substrate motif;Casein kinase I substrate motif;Casein kinase II substrate motif;G protein-coupled receptor kinase 1 substrate motif;Growth associated histone HI kinase substrate motif;GSK-3, ERK1, ERK2, CDK5 substrate motif;PKC kinase substrate motif;WW domain binding motif	ARS(1)RT(1)PPSAPSQSR	104.16	0.999997	0.293488	0.269153	0.0571064	0.151554	0.192825	8.89457	158.29	3	553.245	0.32624
Srrm2	Serine/arginine repetitive matrix protein 2	S	349	1.1426	K	E	K	S	A	V	R	P	S	P	S	P	E	R	S	S	T	PYEDKDKKEKSAVRPSPSPERSSTGPELPAP	Q8BTI8	349	Casein kinase II substrate motif;DNA dependent Protein kinase substrate motif;ERK1,2 kinase substrate motif;GSK-3, ERK1, ERK2, CDK5 substrate motif;PKA kinase substrate motif;PKC kinase substrate motif;WW domain binding motif	SAVRPS(1)PS(1)PER	76.332	1	0.12618	0.201007	0.243199	0.198908	0.192323	8.64771	119.47	3	448.19	-0.47092
Tp53bp1	Tumor suppressor p53-binding protein 1	S	1445	1.14063	A	S	S	S	T	L	R	R	S	D	S	P	E	I	P	F	Q	DSTKRTDASSSTLRRSDSPEIPFQAATGSSD	P70399;A2AU91;A2AU89;E9QL34;Q8C0U1;Q3V1P7;Q8BZ87	1445;1457;1407;1402;234;177;101	Casein kinase II substrate motif;PKA kinase substrate motif;PKC kinase substrate motif	RS(0.5)DS(0.5)PEIPFQAATGSSDGLDSSSSGNSFVGLR	146.28	0.5	0.293017	0.304161	0.13603	0.0261317	0.189835	8.01034	146.28	3	1103.49	-0.45466
Nap1l4	Nucleosome assembly protein 1-like 4	S	125	1.14006	T	D	A	E	S	A	W	H	S	E	N	E	E	E	D	K	L	ITGDVEPTDAESAWHSENEEEDKLAGDMKNK	Q8C1W9;E9Q6R0;B7ZNL2;A2RSB1;Q78ZA7	125;125;125;125;125	Casein kinase II substrate motif;G protein-coupled receptor kinase 1 substrate motif;MAPKAPK2 kinase substrate motif	EFITGDVEPTDAESAWHS(1)ENEEEDK	148.9	0.999999	0.21014	0.213378	0.313477	0.0194628	0.189114	8.79502	170.53	2	1472.59	0.38204
Ubxn1	UBX domain-containing protein 1	S	200	1.1398	T	D	P	G	P	V	P	S	S	P	S	Q	E	P	P	T	K	SRSSPPATDPGPVPSSPSQEPPTKREYDQCR	Q922Y1	200	Casein kinase II substrate motif;ERK1,2 kinase substrate motif;GSK-3, ERK1, ERK2, CDK5 substrate motif;MDC1 BRCT domain binding motif;Plk1 PBD domain binding motif;WW domain binding motif	S(0.369)S(0.423)PPAT(0.208)DPGPVPS(0.043)S(0.886)PS(0.07)QEPPT(0.001)KR	58.342	0.886292	-0.40032	NaN	-0.00848689	0.975141	0.188778	7.53296	82.486	3	826.031	-0.85976
Kank2	KN motif and ankyrin repeat domain-containing protein 2	S	174	1.13857	L	L	P	P	T	P	R	S	S	G	L	S	T	P	V	A	P	SSLAGVGLLPPTPRSSGLSTPVAPSAGHLAH	Q8BX02	174	Casein kinase I substrate motif;Casein kinase II substrate motif;G protein-coupled receptor kinase 1 substrate motif;MDC1 BRCT domain binding motif;PKA kinase substrate motif;PKC kinase substrate motif;Plk1 PBD domain binding motif	S(0.456)S(0.539)GLS(0.028)T(0.967)PVAPS(0.011)AGHLAHVR	62.099	0.539215	0.379732	-0.36303	0.532762	0.199421	0.187221	7.54641	73.464	3	668.642	0.58389
Add1	Alpha-adducin	S	613	1.13805	S	A	V	P	N	T	P	P	S	T	P	V	K	L	E	E	D	EKSPPDQSAVPNTPPSTPVKLEEDLPQEPTS	Q9QYC0;Q8K232;F8WGR0;F8WHZ9;E9Q1K3;F6RDR0	613;613;644;644;642;141	DNA dependent Protein kinase substrate motif	SPPDQSAVPNT(0.993)PPS(0.954)T(0.053)PVKLEEDLPQEPTSR	114.74	0.954051	0.0159258	-0.027131	0.489463	0.268017	0.186569	7.93596	122.84	3	1125.18	-0.073677
Sdpr	Serum deprivation-response protein	S	287	1.13722	H	Q	K	A	S	S	G	K	S	S	P	F	K	V	S	P	L	KKSLTPNHQKASSGKSSPFKVSPLSFGRKKV	Q63918	287	MAPKAPK2 kinase substrate motif	S(1)S(1)PFKVSPLSFGR	125.28	0.999994	0.090447	-0.209595	0.595947	0.265241	0.18551	8.39261	125.28	2	784.849	0.57688
Mfap1b	Microfibrillar-associated protein 1	S	52	1.13698	R	P	D	Y	A	P	M	E	S	S	D	E	E	D	E	E	F	KRYVSGKRPDYAPMESSDEEDEEFQFIKKAK	A2ARQ8;Q9CQU1	52;52	b-Adrenergic Receptor kinase substrate motif;Casein kinase II substrate motif	RPDYAPMES(1)S(1)DEEDEEFQFIKK	159.06	1	0.56306	0.765025	-0.370388	-0.216858	0.18521	8.24944	159.06	3	950.713	0.71744
Mfap1b	Microfibrillar-associated protein 1	S	53	1.13698	P	D	Y	A	P	M	E	S	S	D	E	E	D	E	E	F	Q	RYVSGKRPDYAPMESSDEEDEEFQFIKKAKE	A2ARQ8;Q9CQU1	53;53	BARD1 BRCT domain binding motif;Casein kinase II substrate motif;MDC1 BRCT domain binding motif;Plk1 PBD domain binding motif	RPDYAPMES(1)S(1)DEEDEEFQFIKK	159.06	1	0.56306	0.765025	-0.370388	-0.216858	0.18521	8.24944	159.06	3	950.713	0.71744
Dkc1	H/ACA ribonucleoprotein complex subunit 4	S	451	1.13687	N	V	I	K	R	K	R	D	S	E	S	E	S	D	E	T	P	QLAAEAVNVIKRKRDSESESDETPTVPQLKE	Q3TI79;Q499D4;Q9ESX5	451;451;451	b-Adrenergic Receptor kinase substrate motif;Casein kinase II substrate motif;G protein-coupled receptor kinase 1 substrate motif;GSK3 kinase substrate motif;PAK2 kinase substrate motif;Pim1 kinase substrate sequence;PKA kinase substrate motif;PKC kinase substrate motif	RDS(1)ES(1)ESDETPTVPQLK	192.64	1	0.0963968	0.111966	0.209495	0.322397	0.185064	8.57061	232.59	2	1039.42	0.097282
Zfr	Zinc finger RNA-binding protein	S	1054	1.1368	N	N	R	K	R	R	R	D	S	D	G	V	D	G	F	E	A	NQRFNIHNNRKRRRDSDGVDGFEAEGKKDKK	O88532;B2RUG7	1054;1032	14-3-3 domain binding motif;b-Adrenergic Receptor kinase substrate motif;Calmodulin-dependent protein kinase II substrate motif;MAPKAPK1 kinase substrate motif;PAK2 kinase substrate motif;Pim1 kinase substrate sequence;PKA kinase substrate motif;PKA, PKG kinase substrate motif;PKC epsilon kinase substrate motif;PKC kinase substrate motif;PKG kinase substrate motif;ZIP kinase substrate motif	RRDS(1)DGVDGFEAEGK	88.565	1	-0.313818	0.0647449	0.464445	0.524521	0.184973	8.48491	131.86	2	859.362	0.70583
Dkc1	H/ACA ribonucleoprotein complex subunit 4	S	453	1.13679	I	K	R	K	R	D	S	E	S	E	S	D	E	T	P	T	V	AAEAVNVIKRKRDSESESDETPTVPQLKEKK	Q3TI79;Q499D4;Q9ESX5	453;453;453	b-Adrenergic Receptor kinase substrate motif;Casein kinase I substrate motif;Casein kinase II substrate motif;G protein-coupled receptor kinase 1 substrate motif;Pyruvate dehydrogenase kinase substrate motif	RDS(1)ES(1)ESDETPTVPQLK	213.05	0.99996	0.0308304	0.134089	0.196294	0.378663	0.184969	8.57379	232.59	2	1039.42	-0.074146
Epn2	Epsin-2	S	173	1.13658	Q	I	T	F	G	R	G	S	S	Q	P	N	L	S	T	S	Y	ATGVGSNQITFGRGSSQPNLSTSYSEQEYGK	Q8CHU3;Q5NCM7;Q5NCM6;Q69ZS5;Q5NCM5;F7CUV7;Q5NCM3	173;173;173;191;173;50;49	14-3-3 domain binding motif;ATM kinase substrate motif;Calmodulin-dependent protein kinase I substrate motif;Calmodulin-dependent protein kinase II substrate motif;Calmodulin-dependent protein kinase IV substrate motif;DNA dependent Protein kinase substrate motif;MDC1 BRCT domain binding motif;PKA kinase substrate motif;PKC kinase substrate motif;Plk1 PBD domain binding motif	GS(0.156)S(0.844)QPNLSTSYSEQEYGK	114.04	0.844351	0.0972062	0.0504668	0.358639	0.232498	0.184702	7.8668	215.08	2	1021.42	1.0002
Srrm2	Serine/arginine repetitive matrix protein 2	S	2075	1.13637	S	C	F	S	R	P	S	M	S	P	T	P	L	D	R	C	R	ALSSSRMSCFSRPSMSPTPLDRCRSPGMLEP	Q8BTI8	2075	Casein kinase II substrate motif;ERK1,2 kinase substrate motif;GSK-3, ERK1, ERK2, CDK5 substrate motif;WW domain binding motif	MS(0.001)CFS(0.002)RPS(0.997)MS(1)PTPLDR	135.49	0.999867	0.297954	0.21014	0.21424	0.0154179	0.184438	8.70872	147.9	2	1014.89	-0.42982
Serbp1		S	231	1.13543	D	E	L	T	D	L	D	Q	S	N	V	T	E	E	T	P	E	HNWGTVKDELTDLDQSNVTEETPEGEEHPVA	Q3UEI6;Q3V274	231;231	Casein kinase I substrate motif;Casein kinase II substrate motif	DELTDLDQS(0.986)NVT(0.014)EETPEGEEHPVADTENK	107.88	0.986286	0.0870554	0.148348	0.314302	NaN	0.183235	7.99832	165.38	3	1107.8	1.2696
Ccdc88a	Girdin	S	1677	1.13518	A	H	H	K	M	K	A	G	S	P	G	S	E	V	V	T	L	SETIESRAHHKMKAGSPGSEVVTLQQFLEES	Q5SNZ0;F6R1B7	1677;630	Casein kinase I substrate motif;Casein kinase II substrate motif;ERK1,2 kinase substrate motif;GSK-3, ERK1, ERK2, CDK5 substrate motif;PKA kinase substrate motif;PKC kinase substrate motif;WW domain binding motif	AGS(0.819)PGS(0.181)EVVTLQQFLEESNK	61.612	0.8191	0.263876	0.112233	0.172652	NaN	0.18292	7.18879	180.62	2	1100.51	-1.3999
Pum2	Pumilio homolog 2	T	174	1.13495	A	D	C	K	D	F	N	R	T	P	G	S	R	Q	A	S	P	GLPNGMDADCKDFNRTPGSRQASPTEVVERL	Q80U58;Q3UR91;Q3TQ29;E9PW51;F7A034	174;174;174;174;36	Casein kinase I substrate motif;Casein kinase II substrate motif;Growth associated histone HI kinase substrate motif;GSK-3, ERK1, ERK2, CDK5 substrate motif;WW domain binding motif	T(0.998)PGS(1)RQAS(0.001)PT(0.001)EVVER	76.759	0.998345	-0.144871	NaN	0.594552	0.0981966	0.182626	7.33844	76.759	2	887.382	1.1581
Cdc26	Anaphase-promoting complex subunit CDC26	T	41	1.13491	K	E	D	V	E	G	V	G	T	S	D	G	E	G	A	A	G	LEARKKQKEDVEGVGTSDGEGAAGLSSDPKS	A2AJ02;Q99JP4	41;41		EDVEGVGT(0.864)S(0.136)DGEGAAGLSSDPK	227.66	0.863923	0.0786098	0.231432	0.22989	0.190405	0.182584	7.72324	237.22	2	1078.95	-0.12213
Fam21	WASH complex subunit FAM21	S	614	1.13484	K	T	S	A	L	L	F	S	S	D	E	E	D	Q	W	N	I	PSEQPSKKTSALLFSSDEEDQWNIADSHTKL	Q6PGL7;E9PY74;Q8BRP9	614;614;260	BARD1 BRCT domain binding motif;Casein kinase II substrate motif;MDC1 BRCT domain binding motif;Plk1 PBD domain binding motif	TSALLFS(0.002)S(0.998)DEEDQWNIADSHTK	145.88	0.997768	0.286881	0.176195	0.181378	0.0854968	0.182488	7.77268	174.65	3	858.706	-0.92631
Sdpr	Serum deprivation-response protein	S	288	1.13482	Q	K	A	S	S	G	K	S	S	P	F	K	V	S	P	L	S	KSLTPNHQKASSGKSSPFKVSPLSFGRKKVR	Q63918	288	Cdc2 kinase substrate motif;CDK kinase substrate motif;CDK1,2,4,6 kinase substrate motif;ERK1,2 kinase substrate motif;Growth associated histone HI kinase substrate motif;GSK-3, ERK1, ERK2, CDK5 substrate motif;MAPKAPK2 kinase substrate motif;MDC1 BRCT domain binding motif;PKA kinase substrate motif;PKC kinase substrate motif;Plk1 PBD domain binding motif;WW domain binding motif	S(1)S(1)PFKVSPLSFGR	125.28	0.999995	0.0813396	-0.209595	0.592876	0.265241	0.182465	8.88691	200.33	2	784.849	0.57688
Nemf	Nuclear export mediator factor Nemf	S	417	1.13449	L	L	R	N	P	Y	L	L	S	E	E	E	D	G	D	G	D	QTNHVTMLLRNPYLLSEEEDGDGDASIENSD	Q8CCP0	417	BARD1 BRCT domain binding motif;Casein kinase II substrate motif;G protein-coupled receptor kinase 1 substrate motif	NPYLLS(1)EEEDGDGDASIENSDAEAPK	156.95	1	0.138028	0.427606	-0.0103502	0.172896	0.182045	8.26062	190.19	2	1423.08	-0.3098
Fam21	WASH complex subunit FAM21	S	533	1.13381	T	K	T	Q	K	G	L	F	S	D	E	E	D	S	E	D	L	NLKLVSETKTQKGLFSDEEDSEDLFSSQSSS	Q6PGL7;E9PY74;Q8BRP9	533;533;179	BARD1 BRCT domain binding motif;Casein kinase II substrate motif;PKA kinase substrate motif	GLFS(1)DEEDSEDLFSSQSSSKPK	214.65	1	0.407081	0.454492	-0.10675	-0.0301242	0.181175	8.2615	229.89	2	1250.03	0.33223
Smarcc2	SWI/SNF complex subunit SMARCC2	S	302	1.13364	G	N	Y	K	K	R	K	R	S	P	S	P	S	P	T	P	E	DRRDKKGGNYKKRKRSPSPSPTPEAKKKNAK	Q6PDG5;Q3UID0	302;302	14-3-3 domain binding motif;Calmodulin-dependent protein kinase II substrate motif;Casein kinase I substrate motif;Casein kinase II substrate motif;ERK1,2 kinase substrate motif;G protein-coupled receptor kinase 1 substrate motif;Growth associated histone HI kinase substrate motif;GSK3 kinase substrate motif;GSK-3, ERK1, ERK2, CDK5 substrate motif;MAPKAPK1 kinase substrate motif;Pim1 kinase subst…	RS(1)PS(0.997)PS(0.002)PT(0.002)PEAK	101.15	0.999982	0.36233	0.225645	0.20312	-0.0672258	0.180967	8.47685	188.9	2	707.294	0.83937
Thrap3	Thyroid hormone receptor-associated protein 3	S	315	1.1335	G	S	L	S	P	S	K	K	S	P	V	G	K	S	P	P	A	GQFDHGSGSLSPSKKSPVGKSPPATGSAYGS	A2AJI4;Q569Z6;Q8BZN7;Q8BV76;Q8R353	315;315;315;315;315	ERK1,2 kinase substrate motif;Growth associated histone HI kinase substrate motif;GSK-3, ERK1, ERK2, CDK5 substrate motif;PKA kinase substrate motif;PKC kinase substrate motif;WW domain binding motif	KS(1)PVGKS(1)PPATGSAYGSSQK	135.25	1	0.211261	0.244522	0.120247	0.147106	0.180784	8.35679	239.51	3	698.648	0.0042637
Dcaf10	DDB1- and CUL4-associated factor 10	S	98	1.13309	A	S	Q	A	K	L	S	P	S	S	S	P	R	R	R	S	R	LSAATASASQAKLSPSSSPRRRSRPDWRAGG	A2AKB9	98	Casein kinase II substrate motif;DNA dependent Protein kinase substrate motif;PKA kinase substrate motif	LSPS(0.854)S(0.145)S(0.001)PR	66.692	0.853637	0.388906	0.016211	NaN	0.135681	0.180266	7.6672	83.862	2	455.705	0.46765
Ahnak		T	719	1.13225	K	V	K	G	E	Y	E	V	T	P	P	K	L	E	G	E	L	DLHIKGPKVKGEYEVTPPKLEGELKGSKVDI	E9Q616;F7BRM2	719;454	Cdc2 kinase substrate motif;CDK1,2,4,6 kinase substrate motif;CDK5 kinase substrate motif;GSK-3, ERK1, ERK2, CDK5 substrate motif;WW domain binding motif	GEYEVT(1)PPK	108.56	1	0.0529723	NaN	0.292917	0.191689	0.179193	7.30986	108.56	2	550.239	-0.16841
Srrm2	Serine/arginine repetitive matrix protein 2	S	310	1.13184	H	Q	G	E	G	D	A	P	S	V	E	P	G	A	T	N	I	SPPLASGHQGEGDAPSVEPGATNIQQPSSPA	Q8BTI8	310	Casein kinase I substrate motif;Casein kinase II substrate motif;DNA dependent Protein kinase substrate motif	IHTTALT(0.001)GQS(0.001)PPLAS(0.032)GHQGEGDAPS(0.964)VEPGAT(0.001)NIQQPS(0.452)S(0.452)PAPS(0.048)T(0.048)K	66.793	0.963981	0.171847	0.230941	0.133226	NaN	0.178671	8.40606	66.793	4	1120.52	-0.088401
Dip2b	Disco-interacting protein 2 homolog B	S	99	1.13132	G	A	R	D	E	R	Y	R	S	D	I	H	T	E	A	V	Q	YHRSRSGGARDERYRSDIHTEAVQAALAKHK	Q3UH60	99	14-3-3 domain binding motif;Calmodulin-dependent protein kinase II substrate motif;G protein-coupled receptor kinase 1 substrate motif;MAPKAPK2 kinase substrate motif;PKA kinase substrate motif;PKC kinase substrate motif	Y(0.027)RS(0.973)DIHTEAVQAALAK	94.281	0.973025	0.0870554	-0.269669	0.436959	0.457692	0.178009	7.73535	103.6	3	618.303	-0.42995
Smarcc2	SWI/SNF complex subunit SMARCC2	S	304	1.13115	Y	K	K	R	K	R	S	P	S	P	S	P	T	P	E	A	K	RDKKGGNYKKRKRSPSPSPTPEAKKKNAKKG	Q6PDG5;Q3UID0	304;304	14-3-3 domain binding motif;Akt kinase substrate motif;Calmodulin-dependent protein kinase II substrate motif;Casein kinase I substrate motif;Casein kinase II substrate motif;DNA dependent Protein kinase substrate motif;ERK1,2 kinase substrate motif;G protein-coupled receptor kinase 1 substrate motif;GSK-3, ERK1, ERK2, CDK5 substrate motif;MAPKAPK1 kinase substrate motif;PKA kinase substrate moti…	KRS(1)PS(1)PS(0.001)PTPEAK	110.08	0.999501	0.360196	0.239398	0.163591	-0.0519985	0.177797	8.52101	209.23	3	514.564	0.29216
Cdk14	Cyclin-dependent kinase 14	S	95	1.13114	A	N	Q	V	K	R	V	H	S	E	N	N	A	C	I	N	F	FDPFEKPANQVKRVHSENNACINFKSSSAGK	O35495;Q8BFX6;Q8BQ67;E9Q435;Q9D4N7;E9PVC7;Q6NVF8;Q8BN81;Q8C411;E9Q9M2;D6RHB2;D3YV23	95;95;95;95;95;77;49;49;49;125;49;49	14-3-3 domain binding motif;Calmodulin-dependent protein kinase II substrate motif;Calmodulin-dependent protein kinase IV substrate motif;Chk1 kinase substrate motif;G protein-coupled receptor kinase 1 substrate motif;PKA kinase substrate motif;PKC kinase substrate motif	VHS(1)ENNACINFK	126.71	1	0.132511	-0.403637	0.691593	0.290656	0.177781	7.90335	131.35	2	756.819	0.40676
Ric8a	Synembryn-A	Y	434	1.13044	A	G	G	R	P	E	G	Q	Y	S	E	D	E	D	T	D	T	LAARGLMAGGRPEGQYSEDEDTDTEEYREAK	Q3TIR3	434	ALK kinase substrate motif;Src kinase substrate motif	GLMAGGRPEGQY(0.857)S(0.558)EDEDT(0.558)DT(0.026)EEYREAK	38.746	0.857366	0.45133	0.00848693	0.261915	-0.0142124	0.17688	7.75452	74.222	3	1070.41	-0.14544
Srrm2	Serine/arginine repetitive matrix protein 2	T	2077	1.13028	F	S	R	P	S	M	S	P	T	P	L	D	R	C	R	S	P	SSSRMSCFSRPSMSPTPLDRCRSPGMLEPLG	Q8BTI8	2077	Casein kinase II substrate motif;DNA dependent Protein kinase substrate motif;GSK-3, ERK1, ERK2, CDK5 substrate motif;MAPKAPK2 kinase substrate motif;WW domain binding motif	MSCFS(0.062)RPS(0.495)MS(0.668)PT(0.775)PLDR	94.728	0.775467	0.123799	-0.0668353	0.253017	0.396726	0.176676	7.81716	125.73	3	682.262	-0.68677
Mdc1	Mediator of DNA damage checkpoint protein 1	S	168	1.12972	S	R	V	L	L	A	A	D	S	E	E	E	G	D	F	P	S	IRIESQNSRVLLAADSEEEGDFPSGRCVANG	E9QK89;Q5PSV9	168;168	b-Adrenergic Receptor kinase substrate motif;BARD1 BRCT domain binding motif;Casein kinase II substrate motif;G protein-coupled receptor kinase 1 substrate motif	VLLAADS(1)EEEGDFPSGR	271.91	1	0.146655	0.37729	0.0585931	0.121345	0.175971	8.63598	310.23	2	936.407	-0.17219
Champ1	Chromosome alignment-maintaining phosphoprotein 1	S	448	1.12972	V	S	P	D	Q	R	K	T	S	P	A	S	L	D	F	P	E	SSPDLWKVSPDQRKTSPASLDFPEPQKSSCG	Q8K327	448	14-3-3 domain binding motif;Calmodulin-dependent protein kinase II substrate motif;Casein kinase I substrate motif;Casein kinase II substrate motif;ERK1,2 kinase substrate motif;GSK-3, ERK1, ERK2, CDK5 substrate motif;MAPKAPK2 kinase substrate motif;PKA kinase substrate motif;PKC epsilon kinase substrate motif;PKC kinase substrate motif;WW domain binding motif	KT(0.009)S(0.991)PASLDFPEPQK	116.6	0.991085	NaN	0.0918014	0.367992	0.0681052	0.175966	7.60262	126.8	2	812.885	-0.079132
Mtap1b	Microtubule-associated protein 1B;MAP1 light chain LC1	S	614	1.12907	E	V	S	S	K	E	E	Q	S	P	V	K	A	E	V	A	E	KPSVTEKEVSSKEEQSPVKAEVAEKQATESK	B2RQQ5;P14873;A0PJ96;Q8CFR9;Q3TZM8;Q8CAI9	614;614;614;614;488;259	Casein kinase I substrate motif;Cdc2 kinase substrate motif;CDK kinase substrate motif;CDK1,2,4,6 kinase substrate motif;ERK1,2 kinase substrate motif;G protein-coupled receptor kinase 1 substrate motif;GSK-3, ERK1, ERK2, CDK5 substrate motif;PKA kinase substrate motif;WW domain binding motif	EVSSKEEQS(1)PVK	181.58	1	-0.0285576	NaN	0.284704	0.269251	0.175133	7.70831	194.77	2	713.827	-0.060863
Tprn	Taperin	S	457	1.129	C	V	R	W	Q	R	P	A	S	P	P	P	F	L	P	A	T	AISDTDKCVRWQRPASPPPFLPATAEAEPAE	A2AI08	457	14-3-3 domain binding motif;Calmodulin-dependent protein kinase II substrate motif;ERK1,2 kinase substrate motif;GSK-3, ERK1, ERK2, CDK5 substrate motif;PKA kinase substrate motif;PKC kinase substrate motif;WW domain binding motif	WQRPAS(0.996)PPPFLPAT(0.004)AEAEPAEGLGVPGLAK	60.139	0.996256	0.11836	0.0224743	0.384301	NaN	0.175045	7.48057	94.72	3	1045.53	-0.43723
Strap	Serine-threonine kinase receptor-associated protein	T	345	1.12892	N	S	D	S	I	Y	S	S	T	P	E	V	K	A	_	_	_	LEEIASENSDSIYSSTPEVKA__________	B2RUC7;Q9Z1Z2	345;345	GSK-3, ERK1, ERK2, CDK5 substrate motif;MDC1 BRCT domain binding motif;Plk1 PBD domain binding motif;WW domain binding motif	IGFPETAEEELEEIASENSDSIYS(0.002)S(0.043)T(0.954)PEVKA	131.38	0.954277	0.0292761	-0.162993	0.380803	0.452688	0.174944	7.70922	131.38	3	1151.18	-0.61569
Atrx	Transcriptional regulator ATRX	S	1339	1.12781	K	L	T	L	S	D	G	E	S	G	E	E	K	P	T	K	P	RHRLLRHKLTLSDGESGEEKPTKPKEHKEAK	Q61687;Q3UZ76;Q3UU22	1339;131;86	b-Adrenergic Receptor kinase substrate motif;Casein kinase I substrate motif;Casein kinase II substrate motif;MAPKAPK2 kinase substrate motif	LT(0.148)LS(0.852)DGES(1)GEEKPTKPK	123.55	0.999996	0.239765	0.0556121	0.25896	0.139776	0.173528	8.83739	164.18	2	988.437	-0.32899
Ca13	Carbonic anhydrase 13	S	5	1.1276	_	_	_	_	M	A	R	L	S	W	G	Y	G	E	H	N	G	___________MARLSWGYGEHNGPIHWNEL	Q9D6N1	5	Casein kinase II substrate motif;PKA kinase substrate motif;PKC kinase substrate motif	LS(0.839)WGY(0.161)GEHNGPIHWNELFPIADGDQQSPIEIK	50.144	0.838851	0.102322	NaN	0.173938	0.243523	0.173261	7.53769	62.032	4	932.686	-0.51222
Tnks1bp1	182 kDa tankyrase-1-binding protein	S	602	1.12714	Q	E	P	L	V	G	H	E	S	P	I	T	L	A	A	R	E	AKENYEDQEPLVGHESPITLAAREAALPVLE	B9EKJ7;P58871	602;602	AMP-activated protein kinase substrate motif;b-Adrenergic Receptor kinase substrate motif;Casein kinase I substrate motif;Casein kinase II substrate motif;ERK1,2 kinase substrate motif;GSK-3, ERK1, ERK2, CDK5 substrate motif;WW domain binding motif	ENYEDQEPLVGHES(1)PITLAAR	183.07	1	0.2949	0.242694	0.119275	0.0337763	0.172661	8.73685	191.4	2	1224.56	0.3432
Znrf2	E3 ubiquitin-protein ligase ZNRF2	S	18	1.12704	A	N	G	R	T	R	A	Y	S	G	S	D	L	P	S	G	T	AKQSGPAANGRTRAYSGSDLPSGTGSGGGGA	Q71FD5	18	14-3-3 domain binding motif;Akt kinase substrate motif;Calmodulin-dependent protein kinase II substrate motif;Casein kinase II substrate motif;MAPKAPK1 kinase substrate motif;PKA kinase substrate motif;PKC kinase substrate motif;Pyruvate dehydrogenase kinase substrate motif	AYS(1)GSDLPSGTGSGGGGADGAR	194.33	0.999651	0.184598	0.148999	0.164205	0.192365	0.172542	7.89856	198.47	2	988.903	0.20092
Srrm1	Serine/arginine repetitive matrix protein 1	S	657	1.12658	P	P	K	R	R	V	S	H	S	P	P	P	K	Q	R	S	P	RRASPSPPPKRRVSHSPPPKQRSPTVTKRRS	E9PUK6;A2A8V9;Q52KI8;E9QKA4;A2A8V8;F6UK16;A2A8W1	657;652;657;657;643;103;102	ERK1,2 kinase substrate motif;GSK-3, ERK1, ERK2, CDK5 substrate motif;WW domain binding motif	VS(0.001)HS(0.982)PPPKQRS(0.847)PT(0.165)VT(0.005)K	61.212	0.981981	0.0326651	0.137766	0.158124	0.359268	0.171956	7.88033	67.234	3	635.971	-0.60458
Arid1b		S	1756	1.12581	K	I	E	S	E	G	K	S	S	P	A	L	A	A	P	D	A	EEEEDSEKIESEGKSSPALAAPDASVDPKET	E9Q6R4;E9Q4N7;E9Q4N6;Q3UT39	1756;1757;1275;12	ERK1,2 kinase substrate motif;G protein-coupled receptor kinase 1 substrate motif;GSK-3, ERK1, ERK2, CDK5 substrate motif;MDC1 BRCT domain binding motif;PKA kinase substrate motif;PKC kinase substrate motif;Plk1 PBD domain binding motif;WW domain binding motif	S(0.184)S(0.816)PALAAPDASVDPK	124.68	0.816053	0.50019	0.524465	-0.27965	-0.0611541	0.170963	7.69253	140.46	2	753.348	-0.58184
Sh3pxd2a	SH3 and PX domain-containing protein 2A	S	566	1.12568	D	V	P	A	F	G	F	D	S	E	P	E	M	N	E	E	P	KYEEPEYDVPAFGFDSEPEMNEEPSGDRGSG	O89032	566	b-Adrenergic Receptor kinase substrate motif;Casein kinase II substrate motif;G protein-coupled receptor kinase 1 substrate motif	YEEPEYDVPAFGFDS(0.994)EPEMNEEPS(0.006)GDR	57.152	0.994336	-0.149537	0.19497	0.122334	0.515418	0.170796	7.73437	57.152	3	1072.42	-0.20607
Dkc1	H/ACA ribonucleoprotein complex subunit 4	T	458	1.12535	D	S	E	S	E	S	D	E	T	P	T	V	P	Q	L	K	E	NVIKRKRDSESESDETPTVPQLKEKKKKKDK	Q3TI79;Q499D4;Q9ESX5	458;458;458	b-Adrenergic Receptor kinase substrate motif;G protein-coupled receptor kinase 1 substrate motif;GSK-3, ERK1, ERK2, CDK5 substrate motif;WW domain binding motif	RDS(0.812)ES(0.192)ES(0.006)DET(0.68)PT(0.31)VPQLK	77.045	0.680091	0.113034	0.117163	0.187954	0.263369	0.17038	7.8256	86.575	2	1039.42	-0.1288
Thrap3	Thyroid hormone receptor-associated protein 3	S	248	1.12522	S	D	L	S	P	R	E	R	S	P	A	L	K	S	P	L	Q	SASRASVSDLSPRERSPALKSPLQSVVVRRR	A2AJI4;Q569Z6;Q8BZN7;Q8BV76;Q8R353	248;248;248;248;248	14-3-3 domain binding motif;Calmodulin-dependent protein kinase II substrate motif;ERK1,2 kinase substrate motif;Growth associated histone HI kinase substrate motif;GSK-3, ERK1, ERK2, CDK5 substrate motif;PKA kinase substrate motif;PKC epsilon kinase substrate motif;PKC kinase substrate motif;WW domain binding motif	ERS(1)PALKSPLQSVVVR	126.25	1	0.250476	0.193835	0.128125	0.10841	0.170211	9.17788	168.84	3	616.003	0.63022
Tnks1bp1	182 kDa tankyrase-1-binding protein	Y	591	1.12505	P	L	L	Q	A	K	E	N	Y	E	D	Q	E	P	L	V	G	VEGPPGAPLLQAKENYEDQEPLVGHESPITL	B9EKJ7;P58871	591;591	SHP1 phosphatase substrate motif;Src kinase substrate motif;STAT3 SH2 domain binding motif	ENY(1)EDQEPLVGHESPITLAAR	103.1	0.999997	0.303693	0.316377	0.0446278	0.015243	0.169985	8.3067	122.57	3	816.707	0.097959
39326	Septin-7	T	426	1.1241	L	E	Q	Q	N	S	S	R	T	L	E	K	N	K	K	K	G	WEAQQRILEQQNSSRTLEKNKKKGKIF____	E9Q9F5;O55131;E9Q1G8;Q3UNN1;Q8C2A3	426;425;407;407;407		ILEQQNSSRT(1)LEK	183.7	0.99997	0.0200577	-0.855954	0.536357	0.974631	0.168773	8.14114	222.64	2	813.398	-0.3546
Larp1	La-related protein 1	T	626	1.1238	N	K	I	L	I	V	T	Q	T	P	P	Y	M	R	R	H	P	EIDDRDVNKILIVTQTPPYMRRHPGGDRTGN	Q6ZQ58;Q3UU34	626;451	Casein kinase II substrate motif;GSK-3, ERK1, ERK2, CDK5 substrate motif;WW domain binding motif	ILIVTQT(1)PPYMR	196.18	0.999869	0.332278	0.228603	0.115832	-0.00317046	0.168386	7.95079	209.19	2	764.386	-0.18678
Flna	Filamin-A	S	2327	1.12368	S	P	F	V	V	P	V	A	S	P	S	G	D	A	R	R	L	NEEHIPDSPFVVPVASPSGDARRLTVSSLQE	Q8BTM8;B7FAU9;B9EKP5;B7FAV1;Q6KAM8	2327;2319;2319;2263;1632	Casein kinase II substrate motif;ERK1,2 kinase substrate motif;GSK-3, ERK1, ERK2, CDK5 substrate motif;WW domain binding motif	FNEEHIPDSPFVVPVAS(0.933)PS(0.067)GDAR	98.002	0.933289	0.395831	0.42975	-0.000432773	-0.152248	0.168225	7.91495	98.002	2	1274.08	0.91336
39326	Septin-7	S	334	1.12365	K	N	K	G	Q	L	T	K	S	P	L	A	Q	M	E	E	E	YNGVDNNKNKGQLTKSPLAQMEEERREHVAK	E9Q9F5;O55131;E9Q1G8;Q3UNN1;Q8C2A3;Q5DTS3	334;333;315;315;315;324	ERK1,2 kinase substrate motif;Growth associated histone HI kinase substrate motif;GSK-3, ERK1, ERK2, CDK5 substrate motif;WW domain binding motif	GQLT(0.003)KS(0.997)PLAQMEEERR	86.756	0.997381	0.240375	0.354791	0.0532992	0.0242817	0.168187	7.76673	87.083	3	651.647	-0.086033
Sec31a	Protein transport protein Sec31A	S	531	1.1235	V	A	Q	S	D	G	E	E	S	P	A	A	E	E	Q	L	L	ALKDSDQVAQSDGEESPAAEEQLLGERIKEE	Q3UPL0	531	b-Adrenergic Receptor kinase substrate motif;ERK1,2 kinase substrate motif;GSK-3, ERK1, ERK2, CDK5 substrate motif;WW domain binding motif	VDGPDVALKDSDQVAQS(1)DGEES(1)PAAEEQLLGER	115.05	1	0.148088	NaN	0.2446	0.111321	0.168003	7.8959	121.35	3	1205.52	-0.29038
Mtap1b	Microtubule-associated protein 1B;MAP1 light chain LC1	S	1403	1.12344	S	P	P	L	L	G	S	E	S	P	Y	E	D	F	L	S	A	KVLSPLRSPPLLGSESPYEDFLSADSKVLGR	B2RQQ5;P14873	1403;1403	b-Adrenergic Receptor kinase substrate motif;Casein kinase II substrate motif;ERK1,2 kinase substrate motif;GSK-3, ERK1, ERK2, CDK5 substrate motif;WW domain binding motif	SPPLLGSES(1)PYEDFLSADSK	234.64	0.999937	0.20201	0.295841	0.105349	0.0684985	0.167925	7.57773	277.94	2	1109.99	-0.33888
Stub1	STIP1 homology and U box-containing protein 1	S	20	1.12337	R	L	G	T	G	G	G	G	S	P	D	K	S	P	S	A	Q	EEKEGGARLGTGGGGSPDKSPSAQELKEQGN	Q3TYJ0;Q9WUD1	20;20	Casein kinase I substrate motif;Cdc2 kinase substrate motif;CDK kinase substrate motif;CDK1,2,4,6 kinase substrate motif;ERK1,2 kinase substrate motif;G protein-coupled receptor kinase 1 substrate motif;GSK3 kinase substrate motif;GSK-3, ERK1, ERK2, CDK5 substrate motif;WW domain binding motif	LGTGGGGS(1)PDKSPSAQELK	134.25	0.999998	0.404467	0.0731348	0.210646	-0.0169242	0.167831	9.12205	231.49	3	622.626	0.036699
Ahnak		S	5563	1.12317	S	F	S	D	E	R	E	F	S	A	P	S	T	P	T	G	T	KPRHRSNSFSDEREFSAPSTPTGTLEFAGGD	E9Q616;Q8VDN3;E9Q1H8;Q6UIL4;Q8CGE7	5563;931;644;584;572	14-3-3 domain binding motif;Calmodulin-dependent protein kinase II substrate motif;Casein kinase I substrate motif;Casein kinase II substrate motif;G protein-coupled receptor kinase 1 substrate motif;MAPKAPK2 kinase substrate motif;PKA kinase substrate motif;PKC epsilon kinase substrate motif;PKC kinase substrate motif	EFS(1)APS(0.064)T(0.936)PTGTLEFAGGDAK	188.24	1	-0.261933	-0.0476813	-0.337882	1.31779	0.167573	8.92973	188.24	2	1071.94	0.17922
Brwd1	Bromodomain and WD repeat-containing protein 1	S	1927	1.12284	A	T	D	K	M	K	L	T	S	D	A	E	D	L	S	L	E	ITQRASVATDKMKLTSDAEDLSLESVCTRSK	E9Q2N1;Q921C3;Q3UUZ7	1927;1927;202	Casein kinase II substrate motif;PKA kinase substrate motif;PKC kinase substrate motif	LT(0.178)S(0.822)DAEDLSLESVCTR	132.81	0.822184	NaN	0.00460933	0.366002	0.130839	0.16715	6.97151	132.81	2	938.406	-0.73661
Tbc1d10a	TBC1 domain family member 10A	S	443	1.1225	R	P	A	L	Q	P	S	P	S	I	R	L	P	P	D	A	A	LDAEPGPRPALQPSPSIRLPPDAALLSSKAK	Q5SPX8;P58802;Q3US32;Q8CI62;Q8K2U6;Q571E6	443;409;409;409;283;238	DNA dependent Protein kinase substrate motif;G protein-coupled receptor kinase 1 substrate motif;PKA kinase substrate motif;PKC kinase substrate motif	AILDAEPGPRPALQPS(0.201)PS(0.799)IR	86.367	0.799451	0.403377	0.109829	NaN	-0.0130691	0.166712	7.6156	86.367	3	722.375	-0.3494
Srrm1	Serine/arginine repetitive matrix protein 1	S	664	1.1224	H	S	P	P	P	K	Q	R	S	P	T	V	T	K	R	R	S	PPKRRVSHSPPPKQRSPTVTKRRSPSLSSKH	E9PUK6;A2A8V9;Q52KI8;E9QKA4;A2A8V8;F6UK16;A2A8W1	664;659;664;664;650;110;109	Casein kinase I substrate motif;Casein kinase II substrate motif;ERK1,2 kinase substrate motif;G protein-coupled receptor kinase 1 substrate motif;Growth associated histone HI kinase substrate motif;GSK-3, ERK1, ERK2, CDK5 substrate motif;PKA kinase substrate motif;PKC kinase substrate motif;WW domain binding motif	VS(0.001)HS(0.982)PPPKQRS(0.847)PT(0.165)VT(0.005)K	61.212	0.846962	0.0326651	0.137766	0.158124	0.337813	0.166592	7.77188	67.234	3	635.971	-0.60458
Rprd1b	Regulation of nuclear pre-mRNA domain-containing protein 1B	S	166	1.1218	D	D	D	Y	P	G	S	Y	S	P	Q	D	P	S	A	G	P	QQIQEEEDDDYPGSYSPQDPSAGPLLTEELI	Q9CSU0;F6YB25	166;66	Casein kinase II substrate motif;ERK1,2 kinase substrate motif;G protein-coupled receptor kinase 1 substrate motif;GSK-3, ERK1, ERK2, CDK5 substrate motif;Pyruvate dehydrogenase kinase substrate motif;WW domain binding motif	RTFQQIQEEEDDDY(0.001)PGS(0.08)Y(0.071)S(0.843)PQDPS(0.004)AGPLLTEELIK	71.604	0.843408	0.067501	-0.466357	-0.0392789	1.10138	0.165812	8.27478	135.02	3	1359.28	0.062419
Srrm2	Serine/arginine repetitive matrix protein 2	T	2056	1.12165	T	R	N	H	S	G	S	R	T	P	P	V	A	L	S	S	S	RSATPPATRNHSGSRTPPVALSSSRMSCFSR	Q8BTI8	2056	G protein-coupled receptor kinase 1 substrate motif;Growth associated histone HI kinase substrate motif;GSK-3, ERK1, ERK2, CDK5 substrate motif;MAPKAPK2 kinase substrate motif;WW domain binding motif	NHS(1)GS(1)RT(1)PPVALSSSR	101.36	1	0.133432	0.160533	0.166082	0.202439	0.165621	8.75238	132.86	3	631.587	-0.075382
Tp53bp1	Tumor suppressor p53-binding protein 1	T	378	1.1216	P	F	I	V	P	S	S	P	T	E	Q	G	G	R	K	D	E	PDAFRSTPFIVPSSPTEQGGRKDEPMDMSVI	P70399;A2AU91;A2AU89;E9QL34;A2AU90;Q8BLA0;Q3UG49	378;384;384;379;384;379;383	DNA dependent Protein kinase substrate motif;G protein-coupled receptor kinase 1 substrate motif	STPFIVPS(0.014)S(0.109)PT(0.877)EQGGRK	145.48	0.876694	0.275245	0.375623	NaN	-0.154194	0.165558	7.63053	154.55	2	934.451	0.78519
Kif1b	Kinesin-like protein KIF1B	S	1658	1.12063	T	P	E	A	N	S	R	A	S	S	P	C	Q	E	F	E	Q	SSSMDQKTPEANSRASSPCQEFEQFQIVPTV	A2AH79;Q60575;A2AH78;F6XNB6;A2AH74;E9Q744	1658;1658;1612;337;336;13	PKA kinase substrate motif;PKC kinase substrate motif	AS(0.837)S(0.163)PCQEFEQFQIVPTVETPYLAR	93.255	0.837419	0.23217	0.264476	-0.125387	0.28597	0.164307	7.35776	93.255	3	959.777	0.39506
Ppp2r5d		S	81	1.11993	I	V	K	K	E	R	R	Q	S	S	F	P	F	N	L	N	K	KYSGGPQIVKKERRQSSFPFNLNKNRELQKL	Q7TNL5;Q91V89;Q99PC9;Q8K5D8	81;80;80;45	14-3-3 domain binding motif;Calmodulin-dependent protein kinase II substrate motif;MAPKAPK1 kinase substrate motif;PAK2 kinase substrate motif;PKA kinase substrate motif;PKC epsilon kinase substrate motif;PKC kinase substrate motif	RQS(0.903)S(0.097)FPFNLNK	132.31	0.902818	0.556503	-0.0686952	0.174019	-0.0082	0.163407	8.00017	132.31	2	709.335	-0.18778
Ppil4	Peptidyl-prolyl cis-trans isomerase-like 4	S	178	1.11992	P	D	L	L	I	P	D	R	S	P	E	P	T	K	E	Q	L	DDPFDDPPDLLIPDRSPEPTKEQLDSGRIGA	Q9CXG3;Q9D3J1;Q9CSN5;Q9CSB0	178;178;178;178	Casein kinase I substrate motif;Casein kinase II substrate motif;ERK1,2 kinase substrate motif;G protein-coupled receptor kinase 1 substrate motif;Growth associated histone HI kinase substrate motif;GSK-3, ERK1, ERK2, CDK5 substrate motif;WW domain binding motif	INHTVILDDPFDDPPDLLIPDRS(0.999)PEPT(0.001)K	141.36	0.999341	0.218595	0.10916	0.184802	0.141032	0.163397	8.88349	188.98	4	813.148	-0.1064
Mtap1a	Microtubule-associated protein 1A;MAP1 light chain LC2	S	1133	1.11955	Y	V	P	S	A	G	T	I	S	P	T	S	S	L	E	E	D	EATQGLDYVPSAGTISPTSSLEEDKGFKSPP	A2ARP8;Q9QYR6	1133;895	Casein kinase I substrate motif;Casein kinase II substrate motif;ERK1,2 kinase substrate motif;G protein-coupled receptor kinase 1 substrate motif;GSK3 kinase substrate motif;GSK-3, ERK1, ERK2, CDK5 substrate motif;WW domain binding motif	TEATQGLDYVPS(0.001)AGT(0.006)IS(0.986)PT(0.004)S(0.001)S(0.001)LEEDKGFK	153.1	0.986237	0.1396	0.253142	0.192019	0.0669109	0.162918	7.81599	154.13	3	1036.81	-0.071041
Epb4.1l3		S	569	1.1195	T	N	E	W	E	K	R	L	S	T	S	P	V	R	L	A	A	TSTETALTNEWEKRLSTSPVRLAARQEDAPM	A7YY80;F8WH44;D0VYV6;E9QN88	587;757;581;569	Casein kinase II substrate motif;PAK2 kinase substrate motif;PKA kinase substrate motif;PKC kinase substrate motif	RLS(1)T(0.98)S(0.02)PVR	113.61	0.999901	0.238175	-0.37049	0.751829	0.0319165	0.162858	8.0391	113.61	2	538.238	0.13701
Chaf1a	Chromatin assembly factor 1 subunit A	S	122	1.11928	E	N	C	S	D	I	P	D	S	P	E	G	H	S	E	L	S	VVIIDLTENCSDIPDSPEGHSELSPDTAGVV	Q9QWF0;Q3UXB7	122;122	b-Adrenergic Receptor kinase substrate motif;Casein kinase II substrate motif;ERK1,2 kinase substrate motif;GSK-3, ERK1, ERK2, CDK5 substrate motif;WW domain binding motif	ATIKPVPS(0.001)VVIIDLTENCS(0.004)DIPDS(0.938)PEGHS(0.052)ELS(0.004)PDTAGVVTTVEGAAK	55.767	0.938085	0.197236	0.202386	0.0881014	NaN	0.162575	7.97735	84.582	4	1224.85	0.18103
Rin1	Ras and Rab interactor 1	S	340	1.11926	R	R	P	L	L	R	S	M	S	S	A	F	C	S	L	L	A	RLSRPRHRRPLLRSMSSAFCSLLAPERQVGR	Q921Q7	340	14-3-3 domain binding motif;Calmodulin-dependent protein kinase II substrate motif;Calmodulin-dependent protein kinase IV substrate motif;Chk1 kinase substrate motif;PKA kinase substrate motif;PKC kinase substrate motif	S(0.001)MS(0.996)S(0.004)AFCSLLAPER	190.82	0.995926	0.229957	0.0652966	0.177262	0.17767	0.162546	8.19103	218.63	2	818.349	-0.39931
Cdc26	Anaphase-promoting complex subunit CDC26	S	42	1.11912	E	D	V	E	G	V	G	T	S	D	G	E	G	A	A	G	L	EARKKQKEDVEGVGTSDGEGAAGLSSDPKSR	A2AJ02;Q99JP4	42;42	Casein kinase II substrate motif	EDVEGVGT(0.005)S(0.995)DGEGAAGLSSDPK	239.51	0.994583	0.0980152	0.305095	-0.00963389	0.255977	0.162363	7.99791	255.2	2	1078.95	0.045819
Hdgfrp2	Hepatoma-derived growth factor-related protein 2	S	366	1.1187	K	E	R	A	E	R	G	G	S	S	G	E	E	L	E	D	E	REEKERRKERAERGGSSGEELEDEEPVKKRS	Q3UMU9;D6CHX5	366;313	14-3-3 domain binding motif;Calmodulin-dependent protein kinase II substrate motif;Casein kinase II substrate motif;PKA kinase substrate motif;PKC kinase substrate motif	GGS(1)S(1)GEELEDEEPVKKR	152.51	1	0.379177	0.135141	0.128756	0.00421875	0.161823	8.95985	267.75	2	1003.41	-0.62692
Hdgfrp2	Hepatoma-derived growth factor-related protein 2	S	367	1.1187	E	R	A	E	R	G	G	S	S	G	E	E	L	E	D	E	E	EEKERRKERAERGGSSGEELEDEEPVKKRSR	Q3UMU9;D6CHX5	367;314	Casein kinase II substrate motif;MDC1 BRCT domain binding motif;Plk1 PBD domain binding motif	GGS(1)S(1)GEELEDEEPVKKR	152.51	1	0.379177	0.135141	0.128756	0.00421875	0.161823	8.95985	267.75	2	1003.41	-0.62692
Ddx21	Nucleolar RNA helicase 2	S	243	1.1184	S	S	D	A	P	G	E	E	S	S	S	E	T	E	K	E	I	PSEPKSNSSDAPGEESSSETEKEIPVEQKEG	Q3ULC7;Q6PCP0;Q9JIK5;Q9CWZ5;Q8K2L4	243;243;243;224;81	b-Adrenergic Receptor kinase substrate motif;Casein kinase II substrate motif;G protein-coupled receptor kinase 1 substrate motif	SNSSDAPGEES(0.998)S(0.001)SETEK	258.37	0.998296	0.0363276	0.03492	0.22164	0.352879	0.161442	8.97327	259.64	2	910.839	0.0549
Lmnb1	Lamin-B1;Lamin-B2	S	397	1.1179	L	K	L	S	P	S	P	S	S	R	I	T	I	S	R	A	T	LEGEEERLKLSPSPSSRITISRATSSSSSSS;LEGEEERLKLSPSPSSRVTVSRASSSRSVRT	P14733;Q8C553;P21619;Q3V159	397;397;388;266	Casein kinase I substrate motif;Casein kinase I substrate motif;Casein kinase II substrate motif;Casein kinase II substrate motif;MDC1 BRCT domain binding motif;MDC1 BRCT domain binding motif;Plk1 PBD domain binding motif;Plk1 PBD domain binding motif	LKLS(0.994)PS(0.01)PS(0.008)S(0.988)R	109.1	0.988036	NaN	0.118626	0.360342	0.00342321	0.160797	7.6091	109.1	2	616.278	-0.12603
	Uncharacterized protein C19orf43 homolog	S	37	1.11759	S	G	P	G	T	S	P	E	S	G	D	D	E	V	S	G	S	GRSRWAESGPGTSPESGDDEVSGSSPVSSGV	Q9D735	37	b-Adrenergic Receptor kinase substrate motif;Casein kinase II substrate motif;Pyruvate dehydrogenase kinase substrate motif	WAES(0.003)GPGT(0.003)S(0.003)PES(0.989)GDDEVS(0.004)GS(0.394)S(0.394)PVS(0.105)S(0.105)GVNLFANDGSFLELFK	110.78	0.98916	NaN	-0.074912	0.123717	0.432357	0.160387	7.69059	110.78	3	1440.61	0.13919
Pacsin2	Protein kinase C and casein kinase substrate in neurons protein 2	S	399	1.11725	T	Q	T	Y	P	T	D	W	S	D	D	E	S	N	N	P	F	NVSSYEKTQTYPTDWSDDESNNPFSSTDANG	Q3TDA7;Q9WVE8;Q8BNK9	399;399;35	BARD1 BRCT domain binding motif;Casein kinase II substrate motif;G protein-coupled receptor kinase 1 substrate motif;GSK3 kinase substrate motif	TQTYPT(0.003)DWS(0.978)DDES(0.018)NNPFSSTDANGDSNPFDEDTTSGTEVR	118.82	0.978033	0.189793	0.207268	0.0596904	0.183032	0.159946	8.28003	157.73	3	1493.92	-0.44004
Arfgap2	ADP-ribosylation factor GTPase-activating protein 2	S	145	1.1171	S	M	N	S	A	P	S	H	S	P	E	K	K	D	S	D	F	GTDLWIDSMNSAPSHSPEKKDSDFFTEHTQA	Q99K28	145	Casein kinase II substrate motif;Cdc2 kinase substrate motif;CDK kinase substrate motif;CDK1,2,4,6 kinase substrate motif;ERK1,2 kinase substrate motif;GSK-3, ERK1, ERK2, CDK5 substrate motif;WW domain binding motif	HGTDLWIDSMNSAPS(0.001)HS(0.999)PEK	160.84	0.99914	0.00144204	-0.0504277	0.528261	NaN	0.159758	7.99768	271.66	3	763.66	0.36922
Csda	DNA-binding protein A	S	52	1.11694	A	P	A	A	L	L	A	G	S	P	G	G	D	A	A	P	G	SGAPQAPAPAALLAGSPGGDAAPGPAPASSA	Q9JKB3;Q8BPG0;Q68G78;Q61478	52;52;52;52	ERK1,2 kinase substrate motif;GSK-3, ERK1, ERK2, CDK5 substrate motif;WW domain binding motif	SPAASGAPQAPAPAALLAGS(1)PGGDAAPGPAPASSAPAGGEDAEKK	130.19	1	0.183074	0.390998	-0.0579701	0.122114	0.159554	9.16658	130.19	3	1324.3	0.25191
Ranbp1	Ran-specific GTPase-activating protein	T	13	1.11584	K	D	S	H	E	D	H	D	T	S	T	E	N	A	D	E	S	___MAAAKDSHEDHDTSTENADESNHDPQFE	P34022;Q3U6M5	13;13	b-Adrenergic Receptor kinase substrate motif;Casein kinase I substrate motif;Casein kinase II substrate motif	DS(0.009)HEDHDT(0.786)S(0.787)T(0.317)ENADES(0.1)NHDPQFEPIVSLPEQEIK	83.165	0.785686	-0.231481	0.00245056	NaN	0.703407	0.158126	8.1284	102.5	3	1350.55	0.32823
Klc2	Kinesin light chain 2	S	579	1.11575	N	S	R	M	K	R	A	S	S	L	N	F	L	N	K	S	V	GGPQEPPNSRMKRASSLNFLNKSVEEPVQPG	Q91YS4;D3YXZ3;E9QL75;O88448	579;577;577;575	14-3-3 domain binding motif;AMP-activated protein kinase substrate motif;Calmodulin-dependent protein kinase I substrate motif;Calmodulin-dependent protein kinase II alpha substrate motif;Calmodulin-dependent protein kinase II substrate motif;Calmodulin-dependent protein kinase IV substrate motif;Chk1 kinase substrate motif;MDC1 BRCT domain binding motif;Phosphorylase kinase substrate motif;PKA k…	AS(0.001)S(0.999)LNFLNK	136.53	0.998969	0.378623	0.0107799	0.137616	0.105054	0.158018	7.91388	197.07	2	537.255	0.21871
Lmna	Prelamin-A/C;Lamin-A/C	S	633	1.1155	R	S	F	R	S	V	G	G	S	G	G	G	S	F	G	D	N	ASSVTVTRSFRSVGGSGGGSFGDNLVTRSYL	B3RH23;P48678;Q8BNX5	633;633;103	Casein kinase I substrate motif;G protein-coupled receptor kinase 1 substrate motif;GSK3 kinase substrate motif;MAPKAPK2 kinase substrate motif	SVGGS(1)GGGSFGDNLVTR	187.59	0.99998	0.144568	-0.07224	0.399064	0.159363	0.157689	8.07972	195.18	2	823.862	-0.73278
Ppil4	Peptidyl-prolyl cis-trans isomerase-like 4	T	182	1.1151	I	P	D	R	S	P	E	P	T	K	E	Q	L	D	S	G	R	DDPPDLLIPDRSPEPTKEQLDSGRIGADEEI	Q9CXG3;Q9D3J1;Q9CSN5;Q9CSB0	182;182;182;182	DNA dependent Protein kinase substrate motif;MAPKAPK2 kinase substrate motif	INHTVILDDPFDDPPDLLIPDRS(0.053)PEPT(0.882)KEQLDS(0.065)GR	56.211	0.881738	0.0204844	NaN	0.262971	0.188052	0.157169	7.93187	118.97	5	807.793	0.18071
Irs1	Insulin receptor substrate 1	S	1097	1.11474	Q	G	C	R	R	R	H	S	S	E	T	F	S	A	P	T	R	KVIRADTQGCRRRHSSETFSAPTRAGNTVPF	P35569;Q543V3	1097;1095	14-3-3 domain binding motif;Akt kinase substrate motif;Calmodulin-dependent protein kinase II substrate motif;Casein kinase II substrate motif;G protein-coupled receptor kinase 1 substrate motif;GSK3 kinase substrate motif;MAPKAPK1 kinase substrate motif;MDC1 BRCT domain binding motif;PKA kinase substrate motif;PKC kinase substrate motif;Plk1 PBD domain binding motif;ZIP kinase substrate motif	HS(0.001)S(0.997)ET(0.002)FSAPTR	102.5	0.996968	0.547252	0.212009	0.0927094	-0.225152	0.156705	7.39844	102.5	2	650.272	-0.31189
Ralbp1	RalA-binding protein 1	S	29	1.11451	G	S	G	L	T	R	T	P	S	S	E	E	I	S	P	T	K	EHRRAEHGSGLTRTPSSEEISPTKFPGLYRT	A6H6B3;Q3TX60;Q3ULP3;Q62172;B7ZNM1;E9PWB3;Q3UZV5;Q05C77;Q3UWT5;Q3UUP9	29;29;29;29;29;29;29;29;29;29	14-3-3 domain binding motif;Calmodulin-dependent protein kinase I substrate motif;Calmodulin-dependent protein kinase II substrate motif;Calmodulin-dependent protein kinase IV substrate motif;Casein kinase II substrate motif;Chk1 kinase substrate motif;DNA dependent Protein kinase substrate motif;PKA kinase substrate motif;PKC kinase substrate motif	T(0.004)PS(0.992)S(0.004)EEISPTKFPGLYR	112.16	0.991679	0.243303	0.132116	0.235977	0.0142664	0.156416	8.09447	154.74	3	663.65	0.39402
Spen	Msx2-interacting protein	S	1682	1.11409	A	E	E	A	A	E	A	P	S	P	A	G	E	K	P	A	E	ASSAPEKAEEAAEAPSPAGEKPAEPAPVSEE	Q62504;A2ADB0;A2ADB1;E9Q807	1682;1683;1660;1592	Casein kinase I substrate motif;DNA dependent Protein kinase substrate motif;ERK1,2 kinase substrate motif;GSK-3, ERK1, ERK2, CDK5 substrate motif;WW domain binding motif	AEEAAEAPS(1)PAGEKPAEPAPVSEETK	153.36	1	0.160146	0.239154	0.100175	0.123984	0.155865	7.97147	153.36	3	891.404	-0.35684
Sltm	SAFB-like transcription modulator	S	552	1.11395	E	K	K	R	I	S	S	K	S	P	G	H	M	V	I	L	N	ESLKKSEEKKRISSKSPGHMVILNQTKGDHC	B9EI57;Q8CH25	552;552	ERK1,2 kinase substrate motif;Growth associated histone HI kinase substrate motif;GSK-3, ERK1, ERK2, CDK5 substrate motif;WW domain binding motif	IS(0.001)S(0.061)KS(0.938)PGHMVILNQTK	84.035	0.937675	0.0745054	0.312897	0.158317	0.0770409	0.15569	7.78745	84.035	3	607.309	0.14459
Pds5b		T	1371	1.1139	S	A	V	E	S	T	Q	S	T	P	Q	K	G	R	G	R	P	RAESPETSAVESTQSTPQKGRGRPSKAPSPS	F8WHU5	1371	Cdc2 kinase substrate motif;CDK1,2,4,6 kinase substrate motif;CDK5 kinase substrate motif;Growth associated histone HI kinase substrate motif;GSK-3, ERK1, ERK2, CDK5 substrate motif;MAPKAPK2 kinase substrate motif;MDC1 BRCT domain binding motif;Plk1 PBD domain binding motif;WW domain binding motif	AES(1)PETSAVESTQS(0.021)T(0.979)PQK	247.02	0.979209	-0.0179574	-0.357733	0.468511	0.529677	0.155624	8.12788	247.02	2	1018.91	0.20294
Pds5b	Sister chromatid cohesion protein PDS5 homolog B	T	1368	1.1139	S	A	V	E	S	T	Q	S	T	P	Q	K	G	R	G	R	P	RAESPETSAVESTQSTPQKGRGRPSKAPSPS	Q4VA53	1368	Cdc2 kinase substrate motif;CDK1,2,4,6 kinase substrate motif;CDK5 kinase substrate motif;Growth associated histone HI kinase substrate motif;GSK-3, ERK1, ERK2, CDK5 substrate motif;MAPKAPK2 kinase substrate motif;MDC1 BRCT domain binding motif;Plk1 PBD domain binding motif;WW domain binding motif	AES(1)PETSAVESTQS(0.021)T(0.979)PQK	247.02	0.979209	-0.0179574	-0.357733	0.468511	0.529677	0.155624	8.12788	247.02	2	1018.91	0.20294
Ppfibp1	Liprin-beta-1	S	538	1.11362	S	P	F	P	M	S	P	P	S	P	D	S	R	K	K	S	R	SKGSQGTSPFPMSPPSPDSRKKSRGIMRLFG	Q3U417;Q8C8U0;B2KFS3;Q3UJ84;F6S1C4;B2KFS2;B2KFS4;F6YZ95	538;538;170;538;241;180;137;137	Casein kinase I substrate motif;Casein kinase II substrate motif;DNA dependent Protein kinase substrate motif;ERK1,2 kinase substrate motif;GSK-3, ERK1, ERK2, CDK5 substrate motif;WW domain binding motif	GSQGTSPFPMSPPS(1)PDSR	167.88	0.999768	0.271187	-0.103038	0.319442	0.133432	0.155255	8.32073	167.88	2	964.398	0.45955
Vim	Vimentin	S	73	1.11316	S	S	A	V	R	L	R	S	S	V	P	G	V	R	L	L	Q	GGAYVTRSSAVRLRSSVPGVRLLQDSVDFSL	P20152;Q3U6S1;Q3UAX1;Q5FWJ3;E9PZV5;Q3TFD9;Q3UD36;Q3V2S4;Q3TWV0;A4IF59;A2AKJ2	73;73;73;73;60;73;12;73;73;73;73	AMP-activated protein kinase substrate motif;MDC1 BRCT domain binding motif;PKA kinase substrate motif;PKC kinase substrate motif;Plk1 PBD domain binding motif	LRSS(1)VPGVR	121.68	0.999932	-0.023563	-0.111337	0.420781	0.332753	0.154659	8.56242	121.68	2	525.776	0.16105
Rbbp6	E3 ubiquitin-protein ligase RBBP6	T	985	1.11291	V	L	P	S	R	D	D	A	T	P	V	R	D	E	P	M	D	TKTDTLFVLPSRDDATPVRDEPMDAESITFK	P97868	985	Casein kinase I substrate motif;Cdc2 kinase substrate motif;CDK1,2,4,6 kinase substrate motif;GSK-3, ERK1, ERK2, CDK5 substrate motif;WW domain binding motif	TDTLFVLPS(0.003)RDDAT(0.992)PVRDEPMDAES(0.004)IT(0.001)FK	67.832	0.991929	-0.121188	0.111031	0.289863	0.337649	0.154339	7.98344	90.836	3	1116.19	-0.2843
Osbp	Oxysterol-binding protein;Oxysterol-binding protein 1	S	188	1.11257	K	A	V	K	M	L	A	E	S	D	D	S	G	D	E	E	S	ALELAKAKAVKMLAESDDSGDEESVSQTDKT	E9QPD4;Q3B7Z2	188;134	b-Adrenergic Receptor kinase substrate motif;Casein kinase I substrate motif;Casein kinase II substrate motif	MLAES(1)DDS(1)GDEESVSQTDK	234.21	1	0.333767	0.183709	0.0576469	0.040482	0.153901	7.82586	255.32	2	1109.88	0.48706
Mtap1b	Microtubule-associated protein 1B;MAP1 light chain LC1	S	1911	1.11219	E	K	T	E	R	T	I	K	S	P	C	D	S	G	Y	S	Y	DVGGYYYEKTERTIKSPCDSGYSYETIEKTT	B2RQQ5;P14873	1911;1911	Casein kinase I substrate motif;Casein kinase II substrate motif;ERK1,2 kinase substrate motif;G protein-coupled receptor kinase 1 substrate motif;Growth associated histone HI kinase substrate motif;GSK3 kinase substrate motif;GSK-3, ERK1, ERK2, CDK5 substrate motif;Pyruvate dehydrogenase kinase substrate motif;WW domain binding motif	TIKS(1)PCDSGYSYETIEK	158.78	0.999959	0.292193	0.287236	0.200647	-0.166458	0.153404	7.75332	159.46	2	1029.44	0.79093
Foxk2	Forkhead box protein K2	S	182	1.11178	G	G	G	A	G	G	G	G	S	P	P	G	G	W	A	V	A	GAGAPPAGGGAGGGGSPPGGWAVARLEGREF	F8VPY3;Q3UCQ1	182;24	ERK1,2 kinase substrate motif;GSK-3, ERK1, ERK2, CDK5 substrate motif;WW domain binding motif	AAAAALSGAGAPPAGGGAGGGGS(1)PPGGWAVAR	117.61	1	0.0567222	0.162081	0.22678	0.165887	0.152868	8.15694	155.97	3	889.421	-0.79663
Phf10	PHD finger protein 10	S	296	1.11144	D	P	E	L	P	A	L	D	S	D	G	D	S	D	D	G	E	ALYEPPLDPELPALDSDGDSDDGEDGGGDEK	Q9D8M7;E9QLX5	296;209	b-Adrenergic Receptor kinase substrate motif;Casein kinase II substrate motif;G protein-coupled receptor kinase 1 substrate motif;GSK3 kinase substrate motif;Pyruvate dehydrogenase kinase substrate motif	YLPLNTALYEPPLDPELPALDS(1)DGDS(1)DDGEDGGGDEK	97.352	1	-0.0254707	0.098689	NaN	0.384057	0.152425	7.86308	97.352	3	1350.56	0.67643
Phf10	PHD finger protein 10	S	300	1.11144	P	A	L	D	S	D	G	D	S	D	D	G	E	D	G	G	G	PPLDPELPALDSDGDSDDGEDGGGDEKRKNK	Q9D8M7;E9QLX5	300;213	b-Adrenergic Receptor kinase substrate motif;Casein kinase I substrate motif;MAPKAPK2 kinase substrate motif	YLPLNTALYEPPLDPELPALDS(1)DGDS(1)DDGEDGGGDEK	97.352	1	-0.0254707	0.098689	NaN	0.384057	0.152425	7.86308	97.352	3	1350.56	0.67643
Tfip11	Tuftelin-interacting protein 11;Tuftelin-interacting protein 11;Tuftelin-interacting protein 11	S	96	1.11137	K	G	A	A	E	E	A	D	S	E	D	S	D	A	E	E	K	FISAGLKKGAAEEADSEDSDAEEKPVKQEDF	Q3TTV6;Q9ERA6;Q3UGE9;Q3TPF9	96;96;96;96	b-Adrenergic Receptor kinase substrate motif;Casein kinase I substrate motif;Casein kinase II substrate motif;G protein-coupled receptor kinase 1 substrate motif	GAAEEADS(1)EDS(1)DAEEKPVKQEDFPK	106.42	1	-0.0360672	-0.178012	0.18513	0.638299	0.152337	8.34408	139.11	3	961.049	0.50045
Hmgn1	Non-histone chromosomal protein HMG-14	S	84	1.11104	E	N	G	E	T	E	N	Q	S	P	A	S	E	E	E	K	E	QTTELPAENGETENQSPASEEEKEAKSD___	P18608;Q8CEW1;D3Z607	84;84;74	Casein kinase I substrate motif;Casein kinase II substrate motif;ERK1,2 kinase substrate motif;GSK-3, ERK1, ERK2, CDK5 substrate motif;WW domain binding motif	QADVADQQT(0.285)T(0.687)ELPAENGET(0.048)ENQS(0.811)PAS(0.17)EEEKEAK	37.196	0.81056	0.113834	NaN	0.441948	-0.100036	0.151915	7.78771	86.89	3	1245.18	0.54215
Mia1	Melanoma-derived growth regulatory protein	S	74	1.11077	R	G	Q	V	V	Y	V	F	S	K	L	K	G	R	G	R	L	CRFLTIYRGQVVYVFSKLKGRGRLFWGGSVS	Q3UXX0;D6RFS9;G5E8V2;Q61865	74;74;74;73		FLTIY(1)RGQVVY(1)VFS(1)K	98.227	1	-3.35774	-2.51433	2.7819	3.69643	0.151566	7.71084	126.25	2	1030.46	1.6226
Mia1	Melanoma-derived growth regulatory protein	Y	65	1.11077	P	D	C	R	F	L	T	I	Y	R	G	Q	V	V	Y	V	F	ALQDYVAPDCRFLTIYRGQVVYVFSKLKGRG	Q3UXX0;D6RFS9;G5E8V2;Q61865	65;65;65;64	STAT3 SH2 domain binding motif	FLTIY(1)RGQVVY(1)VFS(1)K	120.9	0.999973	-3.35774	-2.51433	2.7819	3.69643	0.151566	7.71084	126.25	2	1030.46	-2.2449
Mia1	Melanoma-derived growth regulatory protein	Y	71	1.11077	T	I	Y	R	G	Q	V	V	Y	V	F	S	K	L	K	G	R	APDCRFLTIYRGQVVYVFSKLKGRGRLFWGG	Q3UXX0;D6RFS9;G5E8V2;Q61865	71;71;71;70		FLTIY(1)RGQVVY(1)VFS(1)K	126.25	0.999999	-3.35774	-2.51433	2.7819	3.69643	0.151566	7.71084	126.25	2	1030.46	-0.083251
Gm11275	Histone H4;Histone H4;Histone H4	S	48	1.11041	R	R	G	G	V	K	R	I	S	G	L	I	Y	E	E	T	R	PAIRRLARRGGVKRISGLIYEETRGVLKVFL	B2RTM0;P62806;Q6B822	48;48;17	PAK2 kinase substrate motif;PKA kinase substrate motif;PKC kinase substrate motif	RIS(1)GLIYEETR	127.29	1	0.200379	-0.18449	0.530531	0.0579473	0.151092	8.4459	148.7	2	708.848	-0.15758
Sf3b1	Splicing factor 3B subunit 1	T	326	1.11011	R	G	G	D	S	I	G	E	T	P	T	P	G	A	S	K	R	AETPRTDRGGDSIGETPTPGASKRKSRWDET	G5E866;Q99NB9;Q3US00;Q3UIB4;A0JLN0	326;326;326;333;326	b-Adrenergic Receptor kinase substrate motif;GSK-3, ERK1, ERK2, CDK5 substrate motif;MAPKAPK2 kinase substrate motif;WW domain binding motif	GGDS(0.023)IGET(0.974)PT(0.003)PGASK	90.422	0.97412	1.19409	1.00806	-0.561693	-1.03766	0.150697	7.35712	116.06	2	727.314	0.022974
Srrm2	Serine/arginine repetitive matrix protein 2	S	2365	1.10998	R	A	R	S	R	T	P	P	S	A	P	S	Q	S	R	M	T	TSPLMLDRARSRTPPSAPSQSRMTSERERAP	Q8BTI8	2365	Casein kinase I substrate motif;Casein kinase II substrate motif;DNA dependent Protein kinase substrate motif	ARS(0.047)RT(0.969)PPS(0.984)APS(0.001)QSR	84.581	0.983813	0.544881	-0.271461	NaN	0.178192	0.150537	7.58719	113.25	2	829.364	-0.05935
Max		S	2	1.10974	_	_	_	_	_	_	_	M	S	D	N	D	D	I	E	V	E	______________MSDNDDIEVESDADKRA	Q8C4Y1	2	Casein kinase II substrate motif;Pyruvate dehydrogenase kinase substrate motif	S(1)DNDDIEVESDADKR	159.75	1	0.0575542	0.102591	0.178078	0.262642	0.150216	8.16256	162.42	2	915.357	-0.17439
Tjap1	Tight junction-associated protein 1	S	527	1.10963	V	H	H	L	H	R	K	D	S	L	T	Q	A	Q	E	Q	G	RSPKRMGVHHLHRKDSLTQAQEQGTVLS___	Q9DCD5	527	14-3-3 domain binding motif;b-Adrenergic Receptor kinase substrate motif;Calmodulin-dependent protein kinase II alpha substrate motif;Calmodulin-dependent protein kinase II substrate motif;Calmodulin-dependent protein kinase IV substrate motif;Casein kinase II substrate motif;Chk1 kinase substrate motif;G protein-coupled receptor kinase 1 substrate motif;Phosphorylase kinase substrate motif;PKA k…	KDS(0.999)LT(0.001)QAQEQGTVLS	125.23	0.998698	0.53456	-0.375047	0.465281	-0.0244615	0.150083	8.44439	157.98	2	842.893	0.99537
Ppp2r5d		S	82	1.1096	V	K	K	E	R	R	Q	S	S	F	P	F	N	L	N	K	N	YSGGPQIVKKERRQSSFPFNLNKNRELQKLP	Q7TNL5;Q91V89;Q99PC9;Q8K5D8	82;81;81;46	14-3-3 domain binding motif;Calmodulin-dependent protein kinase II substrate motif;MDC1 BRCT domain binding motif;PKA kinase substrate motif;PKC kinase substrate motif;Plk1 PBD domain binding motif;ZIP kinase substrate motif	RQS(0.001)S(0.999)FPFNLNK	130.72	0.999375	0.399445	-0.0358897	0.210529	0.0260729	0.150039	8.13017	130.72	2	709.335	0.17433
Lima1	LIM domain and actin-binding protein 1	S	485	1.10956	A	Q	P	P	N	A	G	E	S	P	H	S	P	G	V	E	D	EETLGRPAQPPNAGESPHSPGVEDAPIAKVG	Q9ERG0;Q8BT15;Q8CD09;Q8C7S2;Q8C3R7	485;325;325;485;325	b-Adrenergic Receptor kinase substrate motif;Casein kinase I substrate motif;Casein kinase II substrate motif;ERK1,2 kinase substrate motif;G protein-coupled receptor kinase 1 substrate motif;GSK-3, ERK1, ERK2, CDK5 substrate motif;WW domain binding motif	S(0.001)DNEET(0.004)LGRPAQPPNAGES(0.817)PHS(0.179)PGVEDAPIAK	41.432	0.816722	0.00690831	-0.0583227	0.393747	0.257597	0.149982	8.29533	136.16	4	837.635	-0.29881
Larp1	La-related protein 1	S	81	1.10904	A	A	A	E	A	P	A	G	S	D	G	E	D	G	G	R	R	RESPRPPAAAEAPAGSDGEDGGRRDFVEAPP	Q6ZQ58	81	Casein kinase II substrate motif	ESPRPPAAAEAPAGS(1)DGEDGGRR	157.9	1	0.289716	0.168	0.0516833	0.0878254	0.149306	8.5349	194.33	3	777.343	0.24965
Tbc1d10b	TBC1 domain family member 10B	S	673	1.10868	P	P	P	P	V	R	R	A	S	A	G	P	V	P	G	A	V	AVGGAPSPPPPVRRASAGPVPGAVVIAEGLH	Q8BHL3	673	14-3-3 domain binding motif;AMP-activated protein kinase substrate motif;Calmodulin-dependent protein kinase II substrate motif;HMGCoA Reductase kinase substrate motif;PAK2 kinase substrate motif;PKA kinase substrate motif;PKC epsilon kinase substrate motif;PKC kinase substrate motif	RAS(1)AGPVPGAVVIAEGLHPSLPSPTGNSTPLGTSK	121.91	1	-0.0556812	-0.175501	0.369856	0.456722	0.148849	7.93794	121.91	4	851.441	0.40701
Kif13a	Kinesin-like protein KIF13A	S	1477	1.10864	A	L	E	A	R	P	L	L	S	Q	E	D	S	E	E	E	E	EEHKKRLALEARPLLSQEDSEEEENELEALS	F8VQ75;Q9EQW7;Q8CDQ6	1477;1477;721	ATM kinase substrate motif;Casein kinase II substrate motif;DNA dependent Protein kinase substrate motif;G protein-coupled receptor kinase 1 substrate motif;GSK3 kinase substrate motif;Pyruvate dehydrogenase kinase substrate motif	LALEARPLLS(0.651)QEDS(0.349)EEEENELEALSR	52.321	0.650721	NaN	0.0164963	0.176756	0.253103	0.148785	7.28176	90.475	3	1017.48	0.90098
Cluap1	Clusterin-associated protein 1	S	409	1.10847	R	K	P	E	P	L	D	E	S	D	N	D	F	_	_	_	_	AKPSRRIRKPEPLDESDNDF___________	Q8R3P7	409	b-Adrenergic Receptor kinase substrate motif;Casein kinase II substrate motif;Pyruvate dehydrogenase kinase substrate motif	IRKPEPLDES(1)DNDF	45.876	1	-0.11143	-0.453755	0.508157	0.651314	0.148572	7.3349	110.77	2	877.885	1.7576
Eif4enif1	Eukaryotic translation initiation factor 4E transporter	S	949	1.10832	H	R	T	S	Q	R	S	S	S	P	V	G	L	A	K	W	F	HMHSQLEHRTSQRSSSPVGLAKWFGSDVLQQ	Q9EST3;Q5NBZ5;Q8BY82;A8Y5K6;Q8BTX7	949;925;925;774;725	14-3-3 domain binding motif;Calmodulin-dependent protein kinase II substrate motif;ERK1,2 kinase substrate motif;GSK-3, ERK1, ERK2, CDK5 substrate motif;MDC1 BRCT domain binding motif;PKA kinase substrate motif;PKC kinase substrate motif;Plk1 PBD domain binding motif;WW domain binding motif	SSS(1)PVGLAK	185.96	0.999987	0.324465	-0.0863542	0.229416	0.125951	0.148369	7.72817	185.96	2	463.223	-0.29862
Plekhg5	Pleckstrin homology domain-containing family G member 5	S	938	1.10788	P	P	R	L	L	K	S	K	S	E	A	S	L	L	Q	L	L	PVQLLPRPPRLLKSKSEASLLQLLSGTPAAR	Q66T02;B1AS68;B1AS67	938;938;925	AMP-activated protein kinase substrate motif;Calmodulin-dependent protein kinase II substrate motif;Casein kinase I substrate motif;Casein kinase II substrate motif;Chk1 kinase substrate motif;G protein-coupled receptor kinase 1 substrate motif;HMGCoA Reductase kinase substrate motif;PKA kinase substrate motif;PKC kinase substrate motif	S(0.178)KS(0.803)EAS(0.02)LLQLLSGTPAAR	74.214	0.802562	NaN	0.0440444	0.220597	0.17878	0.147807	7.09065	113.01	3	636.998	-0.0015431
Rin1	Ras and Rab interactor 1	S	446	1.10763	A	A	R	L	R	R	R	L	S	A	D	G	S	L	G	R	L	KPLRPILAARLRRRLSADGSLGRLAEGFRLA	Q921Q7	446	14-3-3 domain binding motif;Calmodulin-dependent protein kinase II substrate motif;Calmodulin-dependent protein kinase IV substrate motif;Casein kinase I substrate motif;Chk1 kinase substrate motif;G protein-coupled receptor kinase 1 substrate motif;GSK3 kinase substrate motif;MAPKAPK1 kinase substrate motif;PAK2 kinase substrate motif;Pim1 kinase substrate sequence;PKA kinase substrate motif;PKC…	RLS(1)ADGSLGR	98.592	0.999989	0.0890913	0.215989	0.130618	0.154185	0.147471	7.35966	156.6	2	556.266	-0.076992
Purb	Transcriptional activator protein Pur-beta	S	112	1.10703	E	H	Y	A	Q	L	G	P	S	S	P	E	Q	L	A	A	G	DSLGDFIEHYAQLGPSSPEQLAAGAEEGGGP	O35295	112	Casein kinase II substrate motif;DNA dependent Protein kinase substrate motif	DSLGDFIEHYAQLGPS(0.784)S(0.216)PEQLAAGAEEGGGPRR	55.691	0.784146	0.247685	0.221815	0.122162	-0.00489682	0.146691	8.04009	124.28	4	873.652	0.0060829
Sptbn1	Spectrin beta chain, brain 1	T	2107	1.10642	R	P	P	S	P	D	P	N	T	K	V	S	E	E	A	E	S	EEEERKRRPPSPDPNTKVSEEAESQQWDTSK	Q62261;Q8BQ35;Q3TTX2;Q9Z2V0;F6VV16;Q9R1Y9	2107;241;496;160;16;16	Casein kinase I substrate motif;Casein kinase II substrate motif	RRPPSPDPNT(1)K	127.71	0.999891	0.392207	-0.130397	0.277954	0.0438542	0.145905	7.88573	127.71	2	672.825	-0.60661
40057	Septin-9	S	82	1.1058	A	A	R	L	V	D	S	L	S	Q	R	S	P	K	P	S	L	GVKNSEPAARLVDSLSQRSPKPSLRRVELAG	Q80UG5;A2A6U3	82;64	ATM kinase substrate motif;Casein kinase I substrate motif;Casein kinase II substrate motif;DNA dependent Protein kinase substrate motif;G protein-coupled receptor kinase 1 substrate motif;PKA kinase substrate motif;PKC kinase substrate motif	LVDS(0.014)LS(0.906)QRS(0.08)PKPSLR	78.486	0.905613	NaN	-0.321513	0.433253	0.323534	0.145091	8.2354	104.17	2	881.964	-0.13227
Skiv2l		S	240	1.10563	G	G	P	R	G	D	N	A	S	P	S	P	S	G	T	P	L	EDEGEAAGGPRGDNASPSPSGTPLVRASSLE	Q3TW36;Q6NZR5;Q8CDP6;O70349;Q3TE28	240;240;240;232;240	Casein kinase I substrate motif;Casein kinase II substrate motif;ERK1,2 kinase substrate motif;G protein-coupled receptor kinase 1 substrate motif;GSK3 kinase substrate motif;GSK-3, ERK1, ERK2, CDK5 substrate motif;WW domain binding motif	GDNAS(1)PSPSGTPLVR	256.08	1	0.449218	0.291839	-0.0829751	-0.0786098	0.144868	8.15619	256.08	2	767.848	-0.24641
Smg7	Protein SMG7	S	732	1.10528	K	V	I	P	A	L	G	K	S	P	P	H	H	S	G	F	Q	QQQQSPTKVIPALGKSPPHHSGFQQYQQADA	Q5RJH6;F7B2I6;Q3UKQ9	732;778;61	Cdc2 kinase substrate motif;ERK1, ERK2, SAPK, CDK5 and GSK3 kinase substrate motif;ERK1,2 kinase substrate motif;Growth associated histone HI kinase substrate motif;GSK-3, ERK1, ERK2, CDK5 substrate motif;WW domain binding motif	VIPALGKS(1)PPHHSGFQQYQQADASK	69.088	0.999711	0.155879	-0.682048	1.02218	0.0816442	0.144415	7.53656	69.088	3	924.448	-0.16617
Mtap1a	Microtubule-associated protein 1A;MAP1 light chain LC2	S	1219	1.10528	G	E	V	E	E	R	C	L	S	P	D	D	S	T	V	K	M	HPGEPALGEVEERCLSPDDSTVKMASPPPSG	A2ARP8;Q9QYR6	1219;981	14-3-3 domain binding motif;Calmodulin-dependent protein kinase II substrate motif;Casein kinase I substrate motif;Casein kinase II substrate motif;ERK1,2 kinase substrate motif;G protein-coupled receptor kinase 1 substrate motif;GSK3 kinase substrate motif;GSK-3, ERK1, ERK2, CDK5 substrate motif;PKA kinase substrate motif;PKC kinase substrate motif;Pyruvate dehydrogenase kinase substrate motif;W…	CLS(1)PDDSTVK	89.266	0.999982	0.211386	0.153157	0.0686801	NaN	0.144408	6.96579	89.266	2	601.244	-0.23481
Srrm2	Serine/arginine repetitive matrix protein 2	S	1038	1.1051	T	Q	T	W	P	D	T	S	S	P	E	V	M	Q	T	Q	V	FVQQKGHTQTWPDTSSPEVMQTQVESPLLQS	Q8BTI8	1038	Casein kinase I substrate motif;Casein kinase II substrate motif;ERK1,2 kinase substrate motif;GSK-3, ERK1, ERK2, CDK5 substrate motif;MDC1 BRCT domain binding motif;Plk1 PBD domain binding motif;WW domain binding motif	GHTQTWPDT(0.024)S(0.024)S(0.952)PEVMQT(0.001)QVES(0.999)PLLQSK	133.41	0.95216	NaN	0.248778	0.0655816	0.118179	0.144179	7.8234	185.34	3	1057.8	-0.32992
	UPF0690 protein C1orf52 homolog	T	153	1.10506	R	L	L	P	E	G	E	E	T	V	E	S	D	D	D	K	D	PQNAKKARLLPEGEETVESDDDKDERASKIR	Q9CWU4	153	b-Adrenergic Receptor kinase substrate motif;Casein kinase I substrate motif;Casein kinase II substrate motif	LLPEGEET(1)VESDDDKDER	65.038	0.999964	0.19131	0.0600474	0.169209	0.155952	0.14413	8.3918	74.296	3	719.302	0.0022187
Trmt6	tRNA (adenine(58)-N(1))-methyltransferase non-catalytic subunit TRM6	S	11	1.10489	A	S	A	A	E	Q	P	S	S	P	P	P	P	L	G	D	H	_____MEASAAEQPSSPPPPLGDHCIHDGDF	A2AVM7;Q8CE96	11;11	ERK1,2 kinase substrate motif;G protein-coupled receptor kinase 1 substrate motif;GSK-3, ERK1, ERK2, CDK5 substrate motif;MDC1 BRCT domain binding motif;Plk1 PBD domain binding motif;WW domain binding motif	MEASAAEQPS(0.117)S(0.883)PPPPLGDHCIHDGDFVVLK	152.07	0.883201	0.0360461	-0.0223611	0.0561012	0.505799	0.143896	8.21484	165.13	3	1113.83	0.90707
Kcnq2	Potassium voltage-gated channel subfamily KQT member 2	S	581	1.10456	S	A	G	H	L	D	M	L	S	R	I	K	S	L	Q	S	R	MDVIEQYSAGHLDMLSRIKSLQSRVDQIVGR	B7ZBV9;B7ZBW1;B7ZBW2;F6UC55;B7ZBW0;B7ZBV4;Q9Z351;B7ZBV6;B7ZBV8;B7ZBV3;Q3UY10;B7ZBV7;G5E900;B7ZBV5	581;563;553;506;505;553;553;553;541;437;437;553;553;553	Casein kinase I substrate motif;G protein-coupled receptor kinase 1 substrate motif;GSK3 kinase substrate motif	PYDVMDVIEQYSAGHLDMLS(1)R	60.134	0.999957	0.344147	0.0739573	0.117443	0.0383174	0.143466	8.27177	60.134	3	851.034	-0.57302
Lsm14a	Protein LSM14 homolog A	T	194	1.10393	L	D	P	L	R	K	S	P	T	M	E	Q	A	V	Q	T	A	QGRSSPQLDPLRKSPTMEQAVQTASAHLPAP	A2BH30;Q8K2F8	194;194	Calmodulin-dependent protein kinase II substrate motif;Chk1 kinase substrate motif;DNA dependent Protein kinase substrate motif;G protein-coupled receptor kinase 1 substrate motif;PKA kinase substrate motif;PKC kinase substrate motif	S(0.479)S(0.52)PQLDPLRKS(0.102)PT(0.638)MEQAVQT(0.222)AS(0.04)AHLPAPAPVGR	43.457	0.638139	0.500802	NaN	0.122758	-0.1956	0.142654	8.14201	61.499	4	904.186	-0.34672
Srrm2	Serine/arginine repetitive matrix protein 2	S	1225	1.1038	P	E	H	K	E	M	P	G	S	N	I	E	S	S	P	E	V	QVLPSLSPEHKEMPGSNIESSPEVEERPAVL	Q8BTI8	1225	Casein kinase II substrate motif;G protein-coupled receptor kinase 1 substrate motif;GSK3 kinase substrate motif	EMPGS(0.999)NIES(0.53)S(0.469)PEVEERPAVLS(0.002)ALDQSQSQPSK	73.791	0.999008	NaN	0.112767	0.144505	0.170167	0.142479	7.84247	104.13	3	1201.53	0.27608
Arhgap17	Rho GTPase-activating protein 17	S	575	1.1038	Q	G	L	S	P	G	D	S	S	P	P	K	P	K	D	S	V	SSTGILEQGLSPGDSSPPKPKDSVSAAVPAA	Q3UIA2;E9QAJ9;F8WJ58	575;575;73	Cdc2 kinase substrate motif;CDK kinase substrate motif;CDK1,2,4,6 kinase substrate motif;ERK1,2 kinase substrate motif;G protein-coupled receptor kinase 1 substrate motif;Growth associated histone HI kinase substrate motif;GSK-3, ERK1, ERK2, CDK5 substrate motif;MDC1 BRCT domain binding motif;Plk1 PBD domain binding motif;WW domain binding motif	ADSSSGGGPVFSSTGILEQGLS(0.002)PGDS(0.034)S(0.964)PPKPK	124.51	0.963758	NaN	0.16221	0.267809	-0.00259445	0.142475	8.15887	159.66	3	1041.82	-0.27047
Stmn1	Stathmin;Stathmin;Stathmin;Stathmin;Stathmin;Stathmin;Stathmin;Stathmin;Stathmin	S	16	1.10378	V	K	E	L	E	K	R	A	S	G	Q	A	F	E	L	I	L	MASSDIQVKELEKRASGQAFELILSPRSKES	P54227;Q545B6;Q91XT3;Q9DCP3;D3Z5N2;D3Z1Z8;Q8C2H3;Q9CXQ8;Q9CYU5	16;16;16;16;16;16;16;16;16	Calmodulin-dependent protein kinase II substrate motif;Chk1 kinase substrate motif;PAK2 kinase substrate motif;PKA kinase substrate motif;PKC kinase substrate motif	RAS(1)GQAFELILS(1)PR	181.81	1	0.0863761	-0.0983665	0.265102	0.31669	0.14245	8.67105	231.52	2	852.897	-0.49686
Casc3	Protein CASC3	S	145	1.10375	G	T	V	T	G	E	R	Q	S	G	D	G	Q	E	S	T	E	EEKPESKGTVTGERQSGDGQESTEPVENKVG	Q8K3W3	145	Casein kinase I substrate motif;PKA kinase substrate motif;PKC kinase substrate motif	GTVTGERQS(1)GDGQESTEPVENK	127.49	0.999703	0.564622	0.976877	-0.558366	-0.413486	0.142412	8.01787	146.78	3	795.678	0.41152
Prkd1	Serine/threonine-protein kinase D1	S	203	1.10307	S	G	V	R	R	R	R	L	S	N	V	S	L	T	G	L	G	FKIPNNCSGVRRRRLSNVSLTGLGTVRTASA	Q62101	203	14-3-3 domain binding motif;Akt kinase substrate motif;Calmodulin-dependent protein kinase II substrate motif;Casein kinase I substrate motif;Casein kinase II substrate motif;MAPKAPK1 kinase substrate motif;PAK2 kinase substrate motif;Pim1 kinase substrate sequence;PKA kinase substrate motif;PKA, PKG kinase substrate motif;PKC epsilon kinase substrate motif;PKC kinase substrate motif;PKG kinase s…	RLS(1)NVSLTGLGTVR	100.77	0.999998	NaN	0.0287106	0.376433	0.0194482	0.14153	7.58806	194.77	2	776.914	-0.20509
Klf16	Krueppel-like factor 16	S	103	1.10305	A	A	S	T	A	G	G	T	S	P	V	S	S	S	S	A	A	GGPVVATAASTAGGTSPVSSSSAASSPSSGR	B2RPU7;P58334;Q811R6	103;103;103	Casein kinase I substrate motif;Casein kinase II substrate motif;ERK1,2 kinase substrate motif;G protein-coupled receptor kinase 1 substrate motif;GSK3 kinase substrate motif;GSK-3, ERK1, ERK2, CDK5 substrate motif;WW domain binding motif	GGPVVATAASTAGGT(0.044)S(0.939)PVS(0.017)SSSAASSPSSGR	124.17	0.938865	0.00230651	0.00633395	0.295996	0.261345	0.141495	7.76913	124.17	3	910.086	-0.067534
Ahnak		S	3140	1.10257	K	M	P	F	L	S	I	S	S	P	K	V	S	M	P	D	V	KVKGSKFKMPFLSISSPKVSMPDVELNLKGP	E9Q616;A0JLR7	3140;744	Casein kinase I substrate motif;ERK1,2 kinase substrate motif;G protein-coupled receptor kinase 1 substrate motif;Growth associated histone HI kinase substrate motif;GSK3 kinase substrate motif;GSK-3, ERK1, ERK2, CDK5 substrate motif;MDC1 BRCT domain binding motif;PKA kinase substrate motif;PKC kinase substrate motif;Plk1 PBD domain binding motif;WW domain binding motif	MPFLSISS(1)PK	138.24	0.999654	-0.165159	-0.460072	0.649118	0.539582	0.140867	7.64041	164.81	2	593.783	-0.34071
Srrm1	Serine/arginine repetitive matrix protein 1	S	635	1.10253	P	P	P	K	R	R	T	A	S	P	P	P	P	P	K	R	R	QRRYSPSPPPKRRTASPPPPPKRRASPSPPP	E9PUK6;A2A8V9;Q52KI8;E9QKA4;A2A8V8;F6UK16;A2A8W1	635;630;635;635;621;81;80	14-3-3 domain binding motif;Akt kinase substrate motif;Calmodulin-dependent protein kinase II substrate motif;ERK1,2 kinase substrate motif;G protein-coupled receptor kinase 1 substrate motif;GSK-3, ERK1, ERK2, CDK5 substrate motif;MAPKAPK1 kinase substrate motif;PKA kinase substrate motif;PKC kinase substrate motif;WW domain binding motif;ZIP kinase substrate motif	TAS(1)PPPPPK	120.77	0.999999	0.179256	0.0182068	0.151827	0.214006	0.140824	7.97722	126.19	2	486.234	-0.10349
Epb4.1l2	Band 4.1-like protein 2	S	38	1.10239	V	E	N	E	Q	T	P	V	S	E	P	E	E	E	K	G	S	SKEKAKEVENEQTPVSEPEEEKGSQPGPPVE	Q80UE5;B6ZHC5;Q80UE4;B6ZHC7;B6ZHD0;G3X9B8;Q3UNQ6;Q80UE3;O70318;G3X991;Q8C928;B6ZHC6;Q811B2;Q8CGJ6	38;38;38;38;38;38;38;38;38;38;30;38;38;38	Casein kinase II substrate motif;G protein-coupled receptor kinase 1 substrate motif	AKEVENEQTPVS(1)EPEEEK	79.514	0.999974	0.295958	0.0783365	0.205148	-0.0169242	0.140629	8.79012	181.54	3	717.982	-0.050619
Pak1		S	174	1.10216	E	T	P	A	V	P	P	V	S	E	D	E	D	D	D	D	D	LNVKTVSETPAVPPVSEDEDDDDDATPPPVI	G5E884	174	BARD1 BRCT domain binding motif;Casein kinase II substrate motif;G protein-coupled receptor kinase 1 substrate motif	TVSETPAVPPVS(1)EDEDDDDDATPPPVIAPRPEHTK	124.03	0.999816	0.429857	0.0802483	0.145749	-0.0945064	0.140337	8.65188	124.03	3	1268.58	-0.1722
Thumpd2	THUMP domain-containing protein 2	S	172	1.102	Q	E	D	K	L	L	Q	G	S	P	E	Q	G	E	A	V	T	AKDHGESQEDKLLQGSPEQGEAVTRTELQDH	Q9CZB3;Q8BSI5	172;172	Casein kinase II substrate motif;ERK1,2 kinase substrate motif;GSK-3, ERK1, ERK2, CDK5 substrate motif;WW domain binding motif	LLQGS(1)PEQGEAVTR	117.26	1	0.0532504	0.389677	0.0374732	0.0800727	0.140118	7.50837	117.26	2	782.872	-0.049286
Phf2	Lysine-specific demethylase PHF2	S	677	1.10195	V	R	D	E	Y	E	Y	V	S	D	D	G	E	L	K	I	D	KEDKAKPVRDEYEYVSDDGELKIDEFPIRRK	Q9WTU0	677	Casein kinase I substrate motif	AKPVRDEYEY(0.001)VS(0.999)DDGELK	98.816	0.999345	0.569297	0.225522	-0.040121	-0.194465	0.140058	7.8098	102.58	3	731.663	0.031847
Flna	Filamin-A	S	1084	1.10131	G	L	Q	G	G	N	A	G	S	P	A	R	F	T	I	D	T	KVKAFGPGLQGGNAGSPARFTIDTKGAGTGG	Q8BTM8;B7FAU9;B9EKP5;B7FAV1;Q6KAM8;Q3U7N9	1084;1084;1084;1060;397;1002	Cdc2 kinase substrate motif;CDK kinase substrate motif;CDK1,2,4,6 kinase substrate motif;ERK1,2 kinase substrate motif;GSK-3, ERK1, ERK2, CDK5 substrate motif;WW domain binding motif	AFGPGLQGGNAGS(1)PAR	122.19	1	0.170182	-0.0962522	0.384565	0.098382	0.139219	8.73445	214.59	2	768.851	0.62882
Hnrnpul1	Heterogeneous nuclear ribonucleoprotein U-like protein 1	S	195	1.10119	H	R	E	D	R	R	G	R	S	P	Q	P	P	A	E	E	D	RGRGYFEHREDRRGRSPQPPAEEDEDDFDDT	Q8VDM6	195	14-3-3 domain binding motif;Calmodulin-dependent protein kinase II substrate motif;ERK1,2 kinase substrate motif;G protein-coupled receptor kinase 1 substrate motif;Growth associated histone HI kinase substrate motif;GSK-3, ERK1, ERK2, CDK5 substrate motif;MAPKAPK2 kinase substrate motif;PKA kinase substrate motif;PKC kinase substrate motif;WW domain binding motif;ZIP kinase substrate motif	GRS(1)PQPPAEEDEDDFDDTLVAIDTYNCDLHFK	114.47	1	0.119157	0.212258	0.119119	0.105721	0.139064	8.69741	163.46	4	948.153	-0.40181
3110082I17Rik		S	177	1.10115	L	D	E	A	E	P	E	D	S	G	G	S	P	G	K	V	Q	AEALMQKLDEAEPEDSGGSPGKVQRLRQVLQ	G5E8F7	177	b-Adrenergic Receptor kinase substrate motif;Casein kinase I substrate motif;Casein kinase II substrate motif;G protein-coupled receptor kinase 1 substrate motif	LDEAEPEDS(0.996)GGS(0.004)PGK	144.27	0.996056	-0.115004	1.05381	NaN	-0.521754	0.139016	7.12646	158.17	2	784.312	0.042796
Ap3b1	AP-3 complex subunit beta-1	S	276	1.10094	D	N	E	K	N	F	Y	E	S	E	E	E	E	E	E	K	E	REDGGLEDNEKNFYESEEEEEEKEKSSRKKS	Q9Z1T1;Q3UPG0;Q3TQ33;E9PV25	276;276;276;276	b-Adrenergic Receptor kinase substrate motif;BARD1 BRCT domain binding motif;Casein kinase II substrate motif;G protein-coupled receptor kinase 1 substrate motif	NFYES(1)EEEEEEKEK	231.06	1	0.311503	0.0936954	0.120608	0.0291317	0.138735	8.61255	256.71	2	949.864	0.20309
Lmnb1	Lamin-B1;Lamin-B2	S	392	1.10069	G	E	E	E	R	L	K	L	S	P	S	P	S	S	R	I	T	AYRKLLEGEEERLKLSPSPSSRITISRATSS;AYRKLLEGEEERLKLSPSPSSRVTVSRASSS	P14733;Q8C553;P21619;Q3V159	392;392;383;261	Casein kinase I substrate motif;Casein kinase I substrate motif;Casein kinase II substrate motif;Casein kinase II substrate motif;ERK1,2 kinase substrate motif;ERK1,2 kinase substrate motif;G protein-coupled receptor kinase 1 substrate motif;G protein-coupled receptor kinase 1 substrate motif;GSK3 kinase substrate motif;GSK3 kinase substrate motif;GSK-3, ERK1, ERK2, CDK5 substrate motif;GSK-3, ER…	LS(1)PSPSSR	79.201	0.99995	NaN	0.0706641	0.360342	-0.015783	0.138408	8.31093	109.1	2	455.705	-0.21142
Lima1	LIM domain and actin-binding protein 1	S	225	1.10068	R	N	A	G	G	R	R	L	S	E	N	N	C	S	L	D	D	KSLWTQSRNAGGRRLSENNCSLDDWEIGAGH	Q9ERG0;Q8BT15;Q8CD09;Q8C7S2;Q8C3R7	225;65;65;225;65	14-3-3 domain binding motif;Calmodulin-dependent protein kinase II substrate motif;G protein-coupled receptor kinase 1 substrate motif;PAK2 kinase substrate motif;PKA kinase substrate motif;PKC epsilon kinase substrate motif;PKC kinase substrate motif	RLS(1)ENNCSLDDWEIGAGHLSSSAFNSEK	166.24	0.999997	-0.0987681	-0.207511	0.31502	0.544856	0.138399	8.89318	177.54	3	1068.46	0.14988
Ptges3	Prostaglandin E synthase 3	S	148	1.10064	E	V	D	G	A	D	D	D	S	Q	D	S	D	D	E	K	M	DEDVDLPEVDGADDDSQDSDDEKMPDLE___	Q3TJG6;Q9R0Q7	148;148	ATM kinase substrate motif;b-Adrenergic Receptor kinase substrate motif;Casein kinase I substrate motif;Casein kinase II substrate motif;DNA dependent Protein kinase substrate motif	FSEMMDHMGGDEDVDLPEVDGADDDS(1)QDS(1)DDEKMPDLE	100.86	1	0.144829	0.189287	0.105039	0.114223	0.138344	8.49303	109.62	3	1464.18	-0.50576
Ptges3	Prostaglandin E synthase 3	S	151	1.10064	G	A	D	D	D	S	Q	D	S	D	D	E	K	M	P	D	L	VDLPEVDGADDDSQDSDDEKMPDLE______	Q3TJG6;Q9R0Q7	151;151	b-Adrenergic Receptor kinase substrate motif;BARD1 BRCT domain binding motif;Casein kinase II substrate motif	FSEMMDHMGGDEDVDLPEVDGADDDS(1)QDS(1)DDEKMPDLE	100.86	1	0.144829	0.189287	0.105039	0.114223	0.138344	8.49303	109.62	3	1464.18	-0.50576
Epn2	Epsin-2	S	172	1.10063	N	Q	I	T	F	G	R	G	S	S	Q	P	N	L	S	T	S	VATGVGSNQITFGRGSSQPNLSTSYSEQEYG	Q8CHU3;Q5NCM7;Q5NCM6;Q69ZS5;Q5NCM5;F7CUV7;Q5NCM3	172;172;172;190;172;49;48	PKA kinase substrate motif;PKC kinase substrate motif	GS(0.5)S(0.5)QPNLSTSYSEQEYGK	215.08	0.5	-0.100561	0.0590784	0.362325	0.232498	0.138335	7.68914	215.08	2	1021.42	0.85065
Fnbp4	Formin-binding protein 4	S	120	1.10051	C	L	L	G	A	Y	A	D	S	D	D	D	E	S	D	V	S	VKATGGLCLLGAYADSDDDESDVSEKTAQSK	Q6ZQ03;Q9CSQ9	120;132	b-Adrenergic Receptor kinase substrate motif;Casein kinase II substrate motif;Pyruvate dehydrogenase kinase substrate motif	ATGGLCLLGAYADS(1)DDDESDVSEK	148.19	0.999686	0.0060466	0.331591	0.0671829	0.147873	0.138173	7.61559	177.35	2	1284.52	0.50164
Nfkb1	Nuclear factor NF-kappa-B p105 subunit;Nuclear factor NF-kappa-B p50 subunit	S	940	1.1005	V	E	T	S	F	R	K	L	S	F	T	E	S	L	T	G	D	DSVCDSGVETSFRKLSFTESLTGDSPLLSLN	P25799	940	14-3-3 domain binding motif;Calmodulin-dependent protein kinase II substrate motif;Casein kinase I substrate motif;Casein kinase II substrate motif;G protein-coupled receptor kinase 1 substrate motif;GSK3 kinase substrate motif;PKA kinase substrate motif;PKC epsilon kinase substrate motif;PKC kinase substrate motif	KLS(0.995)FT(0.005)ESLTGDSPLLSLNK	203.33	0.99457	NaN	-0.116442	0.141271	0.389659	0.138163	7.14013	203.33	2	1065.54	0.043456
Polr2a	DNA-directed RNA polymerase II subunit RPB1;DNA-directed RNA polymerase	S	1913	1.10027	T	S	P	K	Y	S	P	T	S	P	T	Y	S	P	T	S	P	TSPVYTPTSPKYSPTSPTYSPTSPKYSPTSP	P08775;O08847	1913;1913	Casein kinase I substrate motif;Casein kinase II substrate motif;ERK1,2 kinase substrate motif;G protein-coupled receptor kinase 1 substrate motif;GSK3 kinase substrate motif;GSK-3, ERK1, ERK2, CDK5 substrate motif;WW domain binding motif	Y(0.001)S(0.003)PT(0.009)S(0.987)PT(0.003)Y(0.002)S(0.072)PT(0.838)S(0.087)PK	88.565	0.986719	0.0522768	-0.153992	0.357751	0.295376	0.137853	7.71059	153.75	2	836.831	0.28409
Pi4kb	Phosphatidylinositol 4-kinase beta	S	523	1.09942	A	G	D	I	R	R	R	L	S	E	Q	L	A	H	T	P	T	KEPVFIAAGDIRRRLSEQLAHTPTAFKRDPE	E9Q8A3;Q8BKC8	523;511	14-3-3 domain binding motif;Calmodulin-dependent protein kinase II substrate motif;Calmodulin-dependent protein kinase IV substrate motif;Chk1 kinase substrate motif;G protein-coupled receptor kinase 1 substrate motif;MAPKAPK1 kinase substrate motif;PAK2 kinase substrate motif;Pim1 kinase substrate sequence;PKA kinase substrate motif;PKC epsilon kinase substrate motif;PKC kinase substrate motif;Z…	RLS(1)EQLAHTPTAFK	75.564	0.999975	NaN	-0.135412	0.278741	0.266906	0.136745	7.5604	75.564	3	560.282	-0.33193
Srrm1	Serine/arginine repetitive matrix protein 1	S	448	1.09935	H	K	G	T	E	K	R	E	S	P	S	P	A	P	K	P	R	TSGKVTKHKGTEKRESPSPAPKPRKVELSES	E9PUK6;A2A8V9;Q52KI8;E9QKA4;A2A8V8	448;443;448;448;448	b-Adrenergic Receptor kinase substrate motif;Casein kinase II substrate motif;ERK1,2 kinase substrate motif;G protein-coupled receptor kinase 1 substrate motif;GSK-3, ERK1, ERK2, CDK5 substrate motif;PAK2 kinase substrate motif;PKA kinase substrate motif;PKC kinase substrate motif;WW domain binding motif	RES(1)PS(1)PAPKPR	96.673	1	0.0950467	-0.018425	0.261362	0.208594	0.136644	8.90717	215.61	3	461.206	0.36128
Stub1	STIP1 homology and U box-containing protein 1	T	15	1.0993	K	E	G	G	A	R	L	G	T	G	G	G	G	S	P	D	K	_MKGKEEKEGGARLGTGGGGSPDKSPSAQEL	Q3TYJ0;Q9WUD1	15;15	Calmodulin-dependent protein kinase II substrate motif;PKC kinase substrate motif	LGT(0.985)GGGGS(0.015)PDKSPSAQELK	213.23	0.984648	0.429536	0.0381553	0.123261	-0.0446039	0.136587	8.83306	213.23	2	933.436	0.10934
Ap3d1	AP-3 complex subunit delta-1	T	774	1.09928	P	A	Q	R	V	D	I	I	T	E	E	M	P	E	N	A	L	ESDEDIAPAQRVDIITEEMPENALPSDEDDK	O54774;Q3U237	774;774	Casein kinase I substrate motif;G protein-coupled receptor kinase 1 substrate motif	VDIIT(0.827)EEMPENALPS(0.173)DEDDKDPNDPYR	42.106	0.826643	0.227002	NaN	0.163171	0.0195067	0.13656	8.02259	63.573	3	1071.79	0.65589
Nr3c1	Glucocorticoid receptor	S	242	1.099	L	L	I	D	E	N	L	L	S	P	L	A	G	E	D	D	P	ESPWRSDLLIDENLLSPLAGEDDPFLLEGDV	Q06VW2;E9PYV1;E9PUR6;E9QM82;P06537;Q3U126;Q3U2M7;E0ZPU5;Q05DD1;E9Q310	242;243;243;234;234;234;234;234;234;243	ERK1,2 kinase substrate motif;GSK-3, ERK1, ERK2, CDK5 substrate motif;WW domain binding motif	SDLLIDENLLS(1)PLAGEDDPFLLEGDVNEDCKPLILPDTKPK	72.959	0.999715	0.194339	0.422233	0.263663	-0.335483	0.136188	8.00877	105.64	4	1157.82	0.30023
Syap1	Synapse-associated protein 1	S	283	1.09887	E	D	E	E	E	I	S	T	S	P	G	V	S	E	F	V	S	KSQLKSQEDEEEISTSPGVSEFVSDAFDTCS	A2AMX4;Q9D5V6	283;283	Casein kinase I substrate motif;ERK1,2 kinase substrate motif;G protein-coupled receptor kinase 1 substrate motif;GSK3 kinase substrate motif;GSK-3, ERK1, ERK2, CDK5 substrate motif;WW domain binding motif	SQEDEEEIS(0.01)T(0.154)S(0.834)PGVS(0.002)EFVSDAFDTCSLNQEDLRK	123.21	0.833848	NaN	0.266277	-0.0781998	0.219976	0.136018	7.55746	176.61	3	1310.22	0.26497
Top2b	DNA topoisomerase 2-beta	S	1568	1.09866	K	K	T	S	F	D	Q	D	S	D	V	D	I	F	P	S	D	KTASKKPKKTSFDQDSDVDIFPSDFTSEPPA	Q64511	1568	b-Adrenergic Receptor kinase substrate motif;Casein kinase I substrate motif;Casein kinase II substrate motif;Pyruvate dehydrogenase kinase substrate motif	KT(0.007)S(0.009)FDQDS(0.984)DVDIFPS(0.001)DFTSEPPALPR	85.19	0.983776	-0.0229179	-0.0147036	0.239004	0.34161	0.135748	8.60917	135.54	3	997.781	0.24016
Mprip	Myosin phosphatase Rho-interacting protein	S	289	1.09857	E	E	Q	L	P	P	L	L	S	P	P	S	P	S	T	P	H	AKQDLRAEEQLPPLLSPPSPSTPHSRRSQVI	P97434;F6RND9;Q5SWZ6;Q5SWZ5;F6S5I0;Q8C8T6	289;157;157;289;136;289	Casein kinase I substrate motif;Casein kinase II substrate motif;ERK1,2 kinase substrate motif;G protein-coupled receptor kinase 1 substrate motif;GSK-3, ERK1, ERK2, CDK5 substrate motif;WW domain binding motif	AEEQLPPLLS(0.996)PPS(0.004)PSTPHSR	89.511	0.995756	NaN	-0.0824384	0.272019	0.217289	0.135623	7.67068	96.54	3	740.695	0.25553
Srrm2	Serine/arginine repetitive matrix protein 2	S	1216	1.09838	L	S	Q	V	L	P	S	L	S	P	E	H	K	E	M	P	G	VEKSEQPLSQVLPSLSPEHKEMPGSNIESSP	Q8BTI8	1216	Casein kinase II substrate motif;ERK1,2 kinase substrate motif;GSK-3, ERK1, ERK2, CDK5 substrate motif;WW domain binding motif	SEQPLSQVLPSLS(1)PEHK	177.32	0.999973	-0.335481	-0.0817817	0.208011	0.750737	0.135371	9.24306	207.37	2	978.477	0.90122
Abcf1	ATP-binding cassette sub-family F member 1	S	103	1.09829	L	M	E	R	L	K	Q	L	S	V	P	A	S	D	E	E	D	DDSDERVLMERLKQLSVPASDEEDEVPAPIP	Q5RL55;Q6P542;A1A4B8;G3V012	103;103;103;8	G protein-coupled receptor kinase 1 substrate motif;GSK3 kinase substrate motif;Phosphorylase kinase substrate motif;PKA kinase substrate motif;PKC kinase substrate motif	QLS(1)VPAS(1)DEEDEVPAPIPR	53.444	1	0.419431	-0.0558162	0.146004	0.03143	0.135262	8.29656	138.35	2	1104.98	-1.011
Purb	Transcriptional activator protein Pur-beta	S	113	1.09818	H	Y	A	Q	L	G	P	S	S	P	E	Q	L	A	A	G	A	SLGDFIEHYAQLGPSSPEQLAAGAEEGGGPR	O35295	113	Casein kinase II substrate motif;ERK1,2 kinase substrate motif;GSK-3, ERK1, ERK2, CDK5 substrate motif;MDC1 BRCT domain binding motif;Plk1 PBD domain binding motif;WW domain binding motif	DSLGDFIEHYAQLGPS(0.028)S(0.972)PEQLAAGAEEGGGPRR	99.871	0.971654	0.162081	0.178619	0.204649	-0.00489682	0.135113	8.13017	124.28	3	1164.53	-1.0756
Nup88	Nuclear pore complex protein Nup88	S	710	1.09794	Q	R	K	M	E	K	V	L	S	P	Q	K	P	T	I	T	L	TMKKDYQQRKMEKVLSPQKPTITLSAYQRKC	Q5QNT9;Q8CEC0;Q3TM09;Q5QNU1;Q5QNU0	710;710;704;704;699	Calmodulin-dependent protein kinase II substrate motif;Cdc2 kinase substrate motif;CDK kinase substrate motif;CDK1,2,4,6 kinase substrate motif;Chk1 kinase substrate motif;ERK1,2 kinase substrate motif;G protein-coupled receptor kinase 1 substrate motif;GSK-3, ERK1, ERK2, CDK5 substrate motif;PKA kinase substrate motif;PKC kinase substrate motif;WW domain binding motif	VLS(0.999)PQKPT(0.001)ITLSAYQR	109.1	0.999316	0.0697022	0.0387171	-0.0234682	0.454229	0.134795	7.90754	148.41	3	627.999	0.23635
Sf3b1	Splicing factor 3B subunit 1	T	223	1.0979	L	S	S	W	D	Q	A	E	T	P	G	H	T	P	S	L	R	PGATPKKLSSWDQAETPGHTPSLRWDETPGR	G5E866;Q99NB9;Q3US00;Q3UIB4;A0JLN0	223;223;223;230;223	b-Adrenergic Receptor kinase substrate motif;G protein-coupled receptor kinase 1 substrate motif;GSK-3, ERK1, ERK2, CDK5 substrate motif;WW domain binding motif	LSSWDQAET(1)PGHT(0.999)PS(0.001)LR	115.06	0.999997	0.236217	-0.171401	0.282474	0.191722	0.134753	7.71843	115.06	3	681.285	0.05484
Ddx42	ATP-dependent RNA helicase DDX42	S	185	1.09732	E	E	D	N	L	E	Y	D	S	D	G	N	P	I	A	P	S	AGVVQEEEEDNLEYDSDGNPIAPSKKIIDPL	Q810A7	185	b-Adrenergic Receptor kinase substrate motif;Casein kinase I substrate motif;G protein-coupled receptor kinase 1 substrate motif	YMAENPTAGVVQEEEEDNLEY(0.032)DS(0.966)DGNPIAPS(0.002)K	95.212	0.965759	0.1038	0.0366088	0.252673	0.142831	0.133978	9.07111	137.26	3	1203.17	0.24257
Srrm2	Serine/arginine repetitive matrix protein 2	T	1074	1.09714	S	S	S	P	V	T	E	L	T	A	R	S	P	V	K	Q	D	PKGSLSRSSSPVTELTARSPVKQDKSEISTD	Q8BTI8	1074	Casein kinase I substrate motif;Casein kinase II substrate motif;G protein-coupled receptor kinase 1 substrate motif;PKA kinase substrate motif;PKC kinase substrate motif	S(0.631)S(0.158)S(0.158)PVT(0.052)ELT(0.987)ARS(0.013)PVKQDK	131.33	0.987348	0.0888201	0.263996	0.0239003	0.158252	0.133742	8.83043	133.74	2	1045.48	-0.070917
Ptpn21	Tyrosine-protein phosphatase non-receptor type 21	S	590	1.09692	S	R	H	L	Y	I	S	S	S	N	P	D	L	I	T	R	R	ANSTPDLSRHLYISSSNPDLITRRVHHSVQT	G5E8J4;Q4KML9;Q62136;Q05DI4;Q7TMG1	590;590;590;590;172	Casein kinase II substrate motif;MDC1 BRCT domain binding motif;Plk1 PBD domain binding motif;Pyruvate dehydrogenase kinase substrate motif	HLYISS(0.025)S(0.974)NPDLIT(0.001)R	150.91	0.973619	-0.127715	-0.00202118	0.530093	NaN	0.133452	7.30053	153.36	2	848.409	-1.6413
Svil	Supervillin	S	556	1.09681	K	H	V	V	L	R	R	G	S	L	E	L	G	N	P	S	A	GDGQKEPKHVVLRRGSLELGNPSAAHLGDEL	E3VVQ8;E9Q983;E9Q3Z5;Q8K4L3;Q8K4L2;E9PVA9	556;556;846;960;960;960	14-3-3 domain binding motif;Aurora-A kinase substrate motif;Calmodulin-dependent protein kinase II alpha substrate motif;Calmodulin-dependent protein kinase II substrate motif;Calmodulin-dependent protein kinase IV substrate motif;Casein kinase II substrate motif;Chk1 kinase substrate motif;PAK2 kinase substrate motif;Phosphorylase kinase substrate motif;PKA kinase substrate motif;PKC epsilon kin…	RGS(1)LELGNPSAAHLGDELK	139.46	1	0.118891	-0.0337911	0.279967	0.168204	0.133318	8.94436	141.69	3	682	0.10293
Vim	Vimentin	S	214	1.0968	F	R	Q	D	V	D	N	A	S	L	A	R	L	D	L	E	R	AESTLQSFRQDVDNASLARLDLERKVESLQE	P20152;Q3U6S1;Q3UAX1;Q5FWJ3;E9PZV5;Q3TFD9;Q3UD36;Q3V2S4;Q3TWV0	214;214;214;214;201;214;153;214;214	Casein kinase I substrate motif	QDVDNAS(1)LAR	113.69	1	-0.059495	-0.0916943	0.551078	NaN	0.133296	7.58836	150.49	2	584.753	-0.94297
Serbp1	Plasminogen activator inhibitor 1 RNA-binding protein	S	234	1.09678	T	V	K	D	E	L	T	E	S	P	K	Y	I	Q	K	Q	I	SGSHNWGTVKDELTESPKYIQKQISYNCSDL	Q9CY58;Q3UMP4	234;228	b-Adrenergic Receptor kinase substrate motif;Casein kinase II substrate motif;ERK1,2 kinase substrate motif;Growth associated histone HI kinase substrate motif;GSK-3, ERK1, ERK2, CDK5 substrate motif;PKA kinase substrate motif;PKC kinase substrate motif;WW domain binding motif	DELTES(1)PKYIQK	185.27	0.999995	-0.152741	-0.403656	1.21437	-0.124857	0.13328	8.15381	213.83	2	765.858	-0.44096
	UPF0690 protein C1orf52 homolog	S	156	1.09628	P	E	G	E	E	T	V	E	S	D	D	D	K	D	E	R	A	AKKARLLPEGEETVESDDDKDERASKIRRVE	Q9CWU4	156	b-Adrenergic Receptor kinase substrate motif;Casein kinase II substrate motif;Pyruvate dehydrogenase kinase substrate motif	LLPEGEETVES(1)DDDKDER	216.19	1	0.0238941	0.0522768	0.223138	0.231176	0.132621	8.54327	231.49	2	1078.45	0.19757
Tk1	Thymidine kinase;Thymidine kinase, cytosolic	S	12	1.096	I	N	L	P	T	V	L	P	S	S	P	S	K	T	R	G	Q	____MSYINLPTVLPSSPSKTRGQIQVILGP	B1AQK8;P04184	12;12	Casein kinase I substrate motif;Casein kinase II substrate motif;DNA dependent Protein kinase substrate motif	SYINLPTVLPS(0.774)S(0.176)PS(0.04)KT(0.009)R	155.86	0.773976	-0.13443	-0.375141	0.480378	0.558198	0.132251	7.81758	171.47	2	991.503	0.16407
Fyco1	FYVE and coiled-coil domain-containing protein 1	T	372	1.09589	A	R	A	E	K	G	E	K	T	P	P	D	T	E	L	H	Q	ASLSERLARAEKGEKTPPDTELHQEPVPADL	E9Q4X0;Q8VDC1	372;372	Casein kinase II substrate motif;G protein-coupled receptor kinase 1 substrate motif;Growth associated histone HI kinase substrate motif;GSK-3, ERK1, ERK2, CDK5 substrate motif;PKA kinase substrate motif;WW domain binding motif	GEKT(1)PPDTELHQEPVPADLVLK	90.836	0.999923	0.338225	0.486354	-0.154583	-0.141564	0.132108	7.96454	103.03	3	831.747	0.11989
Capg	Macrophage-capping protein	S	338	1.09568	E	I	L	P	Q	G	R	E	S	P	I	F	K	Q	F	F	K	YSPNTQVEILPQGRESPIFKQFFKNWK____	Q3TNN6;Q3UJ44;Q99LB4;P24452	338;338;338;341	b-Adrenergic Receptor kinase substrate motif;ERK1,2 kinase substrate motif;GSK-3, ERK1, ERK2, CDK5 substrate motif;PKA kinase substrate motif;PKC kinase substrate motif;WW domain binding motif	YSPNTQVEILPQGRES(1)PIFK	160.84	1	0.474462	0.20989	-0.28889	NaN	0.131821	8.47372	160.84	2	1192.09	-0.19032
Fam21	WASH complex subunit FAM21	S	157	1.09527	Q	L	D	I	K	A	G	N	S	D	S	E	E	D	D	A	N	VLDSAFEQLDIKAGNSDSEEDDANERVDLIL	Q6PGL7;E9PY74;Q9CT54	157;157;157	Casein kinase II substrate motif;PKA kinase substrate motif	AGNS(1)DS(1)EEDDANERVDLILEPK	60.23	1	0.342327	0.441165	-0.22231	-0.0360461	0.131284	7.79664	71.002	3	859.353	-0.26391
Fam21	WASH complex subunit FAM21	S	159	1.09527	D	I	K	A	G	N	S	D	S	E	E	D	D	A	N	E	R	DSAFEQLDIKAGNSDSEEDDANERVDLILEP	Q6PGL7;E9PY74;Q9CT54	159;159;159	b-Adrenergic Receptor kinase substrate motif;Casein kinase II substrate motif;G protein-coupled receptor kinase 1 substrate motif;Pyruvate dehydrogenase kinase substrate motif	AGNS(1)DS(1)EEDDANERVDLILEPK	60.23	1	0.342327	0.441165	-0.22231	-0.0360461	0.131284	7.79664	71.002	3	859.353	-0.26391
Zc3hc1	Nuclear-interacting partner of ALK	S	406	1.09477	R	T	K	R	A	R	L	C	S	S	S	S	S	D	T	S	P	VPSSPLRRTKRARLCSSSSSDTSPRSFFDPT	Q80YV2;H3BKM2;Q3TI64	406;364;406	14-3-3 domain binding motif;Akt kinase substrate motif;Calmodulin-dependent protein kinase II substrate motif;Casein kinase I substrate motif;Casein kinase II substrate motif;G protein-coupled receptor kinase 1 substrate motif;GSK3 kinase substrate motif;MAPKAPK1 kinase substrate motif;PKA kinase substrate motif;PKC kinase substrate motif	LCS(0.96)S(0.038)S(0.002)SSDTSPR	99.927	0.960234	0.0490731	-0.195831	NaN	0.53866	0.130634	7.16185	101.75	2	682.263	-0.18857
Prpf4b	Serine/threonine-protein kinase PRP4 homolog	S	92	1.09454	K	R	K	E	V	I	E	A	S	D	K	E	G	L	S	P	A	KHKHKKHKRKEVIEASDKEGLSPAKRTKLDD	C7G3P2;Q61136;Q8C5G1	92;88;88	Casein kinase II substrate motif;PKA kinase substrate motif;PKC kinase substrate motif	EVIEAS(1)DKEGLS(1)PAKR	47.621	1	0.0985544	0.159629	0.157174	0.105939	0.130324	8.29303	177	3	630.287	-0.91389
Add1	Alpha-adducin	S	436	1.09438	G	T	C	S	P	L	R	H	S	F	Q	K	Q	Q	R	E	K	FASDGDSGTCSPLRHSFQKQQREKTRWLHSG	Q9QYC0;Q8K232;F8WGR0;F8WHZ9;E9Q1K3;F6V4G5	436;436;436;436;436;87	PKA kinase substrate motif;PKC kinase substrate motif	Y(0.001)S(0.001)DVEVPAS(0.001)VT(0.001)GHS(0.001)FAS(0.001)DGDS(0.002)GT(0.003)CS(0.012)PLRHS(0.977)FQK	32.251	0.976739	0.296545	-0.221253	0.258995	0.18618	0.130117	8.56381	91.354	4	902.146	-0.51039
Dpysl3	Dihydropyrimidinase-related protein 3	T	627	1.09427	L	T	T	T	P	K	G	G	T	P	A	G	S	T	R	G	S	YDGPVFDLTTTPKGGTPAGSTRGSPTRPNPP	E9PWE8;Q62188;Q3TT92;Q3TAS8	627;514;512;259	G protein-coupled receptor kinase 1 substrate motif;GSK-3, ERK1, ERK2, CDK5 substrate motif;PKA kinase substrate motif;PKC kinase substrate motif;WW domain binding motif	GGT(1)PAGS(0.095)T(0.555)RGS(0.336)PT(0.014)RPNPPVR	58.904	0.999868	0.357045	-0.22874	0.274756	0.116802	0.129966	7.99205	63.272	3	707.991	-0.3615
Npm1	Nucleophosmin	S	10	1.09408	E	D	S	M	D	M	D	M	S	P	L	R	P	Q	N	Y	L	______MEDSMDMDMSPLRPQNYLFGCELKA	Q5SQB7;Q5U438;Q61937;Q5SQB5;Q9DAY9;Q5SQB0;Q3U536;Q8BSZ3;Q3UDA7	10;10;10;10;10;10;10;10;10	Cdc2 kinase substrate motif;CDK kinase substrate motif;CDK1,2,4,6 kinase substrate motif;ERK1,2 kinase substrate motif;G protein-coupled receptor kinase 1 substrate motif;GSK-3, ERK1, ERK2, CDK5 substrate motif;WW domain binding motif	MEDSMDMDMS(1)PLRPQNYLFGCELK	145.05	0.999999	0.369159	0.0788831	0.0164098	0.0544372	0.129722	8.88459	161.04	3	1021.08	0.069623
Srrm2	Serine/arginine repetitive matrix protein 2	T	973	1.09377	P	Y	L	K	S	M	L	Q	T	P	P	D	Q	N	L	S	G	RHSGSTSPYLKSMLQTPPDQNLSGSKSPCPQ	Q8BTI8	973	Casein kinase II substrate motif;GSK-3, ERK1, ERK2, CDK5 substrate motif;MAPKAPK2 kinase substrate motif;WW domain binding motif	SMLQT(1)PPDQNLSGSK	177.6	1	0.396269	0.612966	-0.0278618	-0.464145	0.129307	8.46019	207.82	2	841.876	0.03976
Pdcd5	Programmed cell death protein 5	S	198	1.09376	F	N	R	R	K	V	M	D	S	D	E	D	D	A	D	Y	_	EKKTTVKFNRRKVMDSDEDDADY________	D3Z7Q5;P56812;Q564F6	198;119;119	b-Adrenergic Receptor kinase substrate motif;Casein kinase II substrate motif;PKA kinase substrate motif;Pyruvate dehydrogenase kinase substrate motif	VMDS(1)DEDDADY	129.34	1	0.209017	0.140779	0.113801	0.0535687	0.129291	8.7309	159.18	2	677.705	0.014678
Pola1	DNA polymerase;DNA polymerase alpha catalytic subunit	S	210	1.09339	V	H	T	P	K	A	I	P	S	G	K	P	A	S	P	V	L	ALLNPFSVHTPKAIPSGKPASPVLRNEPLLT	A2A4H0;P33609;B9EHJ9;Q8CAT7	210;210;210;210	DNA dependent Protein kinase substrate motif;G protein-coupled receptor kinase 1 substrate motif;PKA kinase substrate motif;PKC kinase substrate motif	AIPS(0.933)GKPAS(0.067)PVLR	60.474	0.932818	0.380619	-0.0397701	0.0455656	NaN	0.128805	7.0769	91.076	2	686.871	0.83344
Cwc22	Pre-mRNA-splicing factor CWC22 homolog	S	829	1.09329	K	K	R	R	E	R	R	D	S	F	S	E	N	E	K	Q	R	EDRHGEPKKRRERRDSFSENEKQRSRNQDSD	B1AYU5;Q8C5N3;B1AYU7;B1AYU6;Q6ZPL7	829;829;824;823;828	14-3-3 domain binding motif;Akt kinase substrate motif;b-Adrenergic Receptor kinase substrate motif;Calmodulin-dependent protein kinase II substrate motif;Casein kinase II substrate motif;MAPKAPK1 kinase substrate motif;PAK2 kinase substrate motif;PKA kinase substrate motif;PKC epsilon kinase substrate motif;PKC kinase substrate motif	RDS(1)FSENEK	112.44	0.999755	-0.191574	-0.0179867	0.767192	-0.0429245	0.128677	7.76316	135.14	2	596.238	0.25035
Senp3	Sentrin-specific protease 3	S	163	1.09245	L	A	H	P	K	N	H	L	S	P	Q	E	G	G	A	T	P	HRGRRRNLAHPKNHLSPQEGGATPQVPSPCC	Q9EP97	163	Casein kinase II substrate motif;ERK1,2 kinase substrate motif;GSK-3, ERK1, ERK2, CDK5 substrate motif;PKA kinase substrate motif;WW domain binding motif	NHLS(1)PQEGGATPQVPSPCCR	89.344	0.999751	0.284277	0.35558	-0.0082	-0.121413	0.127561	7.60043	119.08	3	757.993	-0.18796
Hnrnpa1	Heterogeneous nuclear ribonucleoprotein A1	S	4	1.09244	_	_	_	_	_	M	S	K	S	E	S	P	K	E	P	E	Q	____________MSKSESPKEPEQLRKLFIG	P49312;Q3TFB1;Q3TIK8;Q3U7F3;Q5EBP8;Q3UK83	4;4;4;4;4;4	Casein kinase II substrate motif;G protein-coupled receptor kinase 1 substrate motif	S(0.023)KS(0.977)ES(1)PKEPEQLR	100.77	0.976517	0.117961	-0.21058	0.638052	-0.0352017	0.127558	8.71008	139.46	2	858.866	-0.37789
Mtap1b	Microtubule-associated protein 1B;MAP1 light chain LC1	S	1013	1.09205	L	E	K	G	E	A	E	Q	S	E	E	E	G	E	E	E	D	EEDMDDVLEKGEAEQSEEEGEEEDKAEDARE	B2RQQ5;P14873	1013;1013	BARD1 BRCT domain binding motif;Casein kinase II substrate motif;G protein-coupled receptor kinase 1 substrate motif	GEAEQS(1)EEEGEEEDKAEDAREEGYEPDK	148.19	1	0.219711	0.246104	-0.0344974	0.0768128	0.127033	8.70085	148.19	3	1088.75	-0.048631
Chka	Choline kinase alpha	S	71	1.09202	P	L	P	L	P	P	P	P	S	P	P	L	A	D	E	Q	P	LPPPPPPPLPLPPPPSPPLADEQPEPRTRRR	G5E853;O54804;G3X9G1;Q3TLJ9;Q5J2U5;F7AYX1	71;71;71;71;71;63	DNA dependent Protein kinase substrate motif;ERK1,2 kinase substrate motif;G protein-coupled receptor kinase 1 substrate motif;GSK-3, ERK1, ERK2, CDK5 substrate motif;WW domain binding motif	TQPLALPPPPPPPLPLPPPPS(1)PPLADEQPEPR	68.835	1	0.0560286	0.214622	NaN	0.110339	0.126997	7.60292	97.877	3	1143.93	-0.049429
Lmnb1	Lamin-B1;Lamin-B2	S	394	1.09168	E	E	R	L	K	L	S	P	S	P	S	S	R	I	T	I	S	RKLLEGEEERLKLSPSPSSRITISRATSSSS;RKLLEGEEERLKLSPSPSSRVTVSRASSSRS	P14733;Q8C553;P21619;Q3V159	394;394;385;263	Casein kinase I substrate motif;Casein kinase I substrate motif;Casein kinase II substrate motif;Casein kinase II substrate motif;DNA dependent Protein kinase substrate motif;DNA dependent Protein kinase substrate motif;ERK1,2 kinase substrate motif;ERK1,2 kinase substrate motif;GSK-3, ERK1, ERK2, CDK5 substrate motif;GSK-3, ERK1, ERK2, CDK5 substrate motif;PKA kinase substrate motif;PKA kinase s…	LKLS(1)PS(0.98)PS(0.015)S(0.005)R	79.089	0.979712	NaN	0.0589399	0.421303	-0.100574	0.126556	8.14811	97.417	2	616.278	-0.87826
Ahnak		S	5596	1.09168	F	G	T	F	G	G	L	G	S	K	S	K	G	H	Y	E	V	GKHGKLKFGTFGGLGSKSKGHYEVTGSDDEA	E9Q616;Q8VDN3;E9Q1H8;Q6UIL4;Q8CGE7	5596;964;677;617;605	Casein kinase II substrate motif	FGTFGGLGS(1)K	132.32	1	0.290307	-0.812714	0.591288	0.43733	0.126553	9.13466	156.17	1	1050.47	0.75677
Grb10	Growth factor receptor-bound protein 10	S	501	1.09119	S	T	R	M	N	I	L	S	S	Q	S	P	L	H	P	S	T	GHAWRKRSTRMNILSSQSPLHPSTLNAVIHR	Q60760;Q5SUW3;Q3TFU9	501;430;242	ATM kinase substrate motif;Casein kinase II substrate motif;DNA dependent Protein kinase substrate motif;MDC1 BRCT domain binding motif;Plk1 PBD domain binding motif	MNILS(0.004)S(0.887)QS(0.109)PLHPSTLNAVIHR	108.77	0.886916	NaN	-0.654694	0.63498	0.397429	0.125905	7.57883	108.77	3	804.402	0.12488
Apoa1bp	NAD(P)H-hydrate epimerase	S	43	1.09109	W	W	G	T	Q	R	R	G	S	E	T	M	A	G	A	A	V	VCRARPIWWGTQRRGSETMAGAAVKYLSQEE	Q8K4Z3	43	14-3-3 domain binding motif;Calmodulin-dependent protein kinase II substrate motif;Casein kinase II substrate motif;G protein-coupled receptor kinase 1 substrate motif;PAK2 kinase substrate motif;PKA kinase substrate motif;PKC epsilon kinase substrate motif;PKC kinase substrate motif	RGS(1)ETMAGAAVK	131.56	0.99992	0.420294	-0.0106139	NaN	-0.032383	0.125766	8.07922	157.58	2	629.286	-0.28408
Rbm25	RNA-binding protein 25	S	675	1.09105	S	L	K	L	G	A	S	N	S	P	G	Q	P	N	S	V	K	HRPKIGLSLKLGASNSPGQPNSVKRKKLPVD	B2RY56;Q8BU35	675;149	ERK1,2 kinase substrate motif;G protein-coupled receptor kinase 1 substrate motif;GSK-3, ERK1, ERK2, CDK5 substrate motif;WW domain binding motif	LGASNS(1)PGQPNSVKR	198.51	1	0.131194	0.0170666	0.185589	0.169031	0.12572	8.78866	239.55	2	796.383	0.69566
Ahnak		S	4789	1.09101	P	E	A	E	L	N	V	D	S	P	E	I	N	I	G	G	K	PTVDVTVPEAELNVDSPEINIGGKSKKSKFK	E9Q616;Q8VDN3;F7BRM2;Q6UL10;A0PJF4;Q8BKS2	4789;157;1916;1918;868;250	b-Adrenergic Receptor kinase substrate motif;Casein kinase II substrate motif;ERK1,2 kinase substrate motif;GSK-3, ERK1, ERK2, CDK5 substrate motif;WW domain binding motif	TPTVDVTVPEAELNVDS(1)PEINIGGK	125.42	1	0.276199	0.0776532	0.113068	0.0357418	0.125665	8.30829	159.66	2	1337.65	-0.31798
Eif4g1	Eukaryotic translation initiation factor 4 gamma 1	S	1189	1.09071	T	P	A	T	K	R	S	F	S	K	E	V	E	E	R	S	R	DRLDRARTPATKRSFSKEVEERSRERPSQPE	Q6NZJ6;E9PVC5;E9Q9E1;E9PVC6;E9Q298;Q6PD42;Q8K0J8;Q8R2V4	1189;1183;1182;1142;419;412;231;68	14-3-3 domain binding motif;Calmodulin-dependent protein kinase II substrate motif;Casein kinase II substrate motif;PKA kinase substrate motif;PKC kinase substrate motif	SFS(1)KEVEER	135.02	0.999995	-0.069573	-0.0795085	0.349971	0.300182	0.125268	8.49231	135.02	2	595.758	0.31949
Itsn1	Intersectin-1	S	335	1.09067	Q	R	L	P	E	E	P	S	S	E	D	E	Q	Q	P	E	K	ISSSSVDQRLPEEPSSEDEQQPEKKLPVTFE	E9Q0N0;F8VQE5;Q9Z0R4;E9Q3I5;E9PUZ2;E9Q3I4;E9Q3I9;E9Q3I8;Q6NZJ5;Q3U2A1;D3Z6P4	335;335;335;335;335;298;335;335;335;335;274	BARD1 BRCT domain binding motif;Casein kinase I substrate motif;Casein kinase II substrate motif;G protein-coupled receptor kinase 1 substrate motif;MDC1 BRCT domain binding motif;Plk1 PBD domain binding motif	LPEEPS(0.034)S(0.966)EDEQQPEK	145.69	0.96575	-0.114363	0.201383	0.254289	0.159573	0.12522	7.70058	176.28	2	911.375	0.35991
Ahnak		S	4798	1.09023	P	E	I	N	I	G	G	K	S	K	K	S	K	F	K	M	P	AELNVDSPEINIGGKSKKSKFKMPKIHMSGP	E9Q616;Q8VDN3;F7BRM2;Q6UL10;A0PJF4;Q8BKS2	4798;166;1925;1927;877;259	Casein kinase I substrate motif;Casein kinase II substrate motif;PKA kinase substrate motif;PKC kinase substrate motif	TPTVDVTVPEAELNVDSPEINIGGKS(1)K	150.64	0.999742	0.670478	-1.08761	0.791033	NaN	0.124633	7.24991	150.64	3	963.809	0.17553
Naf1	H/ACA ribonucleoprotein complex non-core subunit NAF1	S	416	1.08919	P	P	P	E	V	L	D	F	S	D	D	E	K	E	K	E	A	SWKNDQEPPPEVLDFSDDEKEKEAKQRKKSQ	E9QJT2;E9Q1F9;Q3UMQ8	416;309;308	BARD1 BRCT domain binding motif;Casein kinase II substrate motif	NDQEPPPEVLDFS(1)DDEKEKEAK	49.036	1	0.131853	0.334683	-0.131853	0.158317	0.12325	8.42418	73.11	3	880.385	-0.3951
Tjp1	Tight junction protein ZO-1	S	1534	1.08913	T	M	P	K	A	V	P	V	S	P	S	A	V	E	E	D	E	YQMNNISTMPKAVPVSPSAVEEDEDEDGHTV	B9EHJ3;P39447;Q91YW2	1534;1614;606	Casein kinase II substrate motif;ERK1,2 kinase substrate motif;GSK-3, ERK1, ERK2, CDK5 substrate motif;WW domain binding motif	AVPVS(0.887)PS(0.113)AVEEDEDEDGHTVVATAR	44.161	0.887098	0.412511	0.480368	-0.386701	-0.013498	0.12317	7.98605	78.975	3	887.396	0.15944
Ap3d1	AP-3 complex subunit delta-1	S	784	1.0891	E	M	P	E	N	A	L	P	S	D	E	D	D	K	D	P	N	RVDIITEEMPENALPSDEDDKDPNDPYRALD	O54774;Q3U237	784;784	Casein kinase II substrate motif;DNA dependent Protein kinase substrate motif;Pyruvate dehydrogenase kinase substrate motif	VDIITEEMPENALPS(1)DEDDKDPNDPYR	161.02	1	0.17479	0.140124	0.202257	-0.0246034	0.123142	9.07886	171.42	3	1071.79	-0.098632
Pbrm1	Protein polybromo-1	S	39	1.08893	P	S	R	K	R	R	R	L	S	N	L	P	T	V	D	P	I	HSVPTPGPSRKRRRLSNLPTVDPIAVCHELY	F8VQD1;E9Q4Y5;D3Z1N4;Q8BSQ9;E9Q7L2;D3Z1W6;E9Q7L3;D3YYF2;D3Z3R4;D6RI94;D6RIL0;D3Z1M8;D3YYG4	39;39;39;39;39;39;39;39;60;39;39;57;60	14-3-3 domain binding motif;Calmodulin-dependent protein kinase II substrate motif;Casein kinase I substrate motif;G protein-coupled receptor kinase 1 substrate motif;MAPKAPK1 kinase substrate motif;PAK2 kinase substrate motif;Pim1 kinase substrate sequence;PKA kinase substrate motif;PKA, PKG kinase substrate motif;PKC epsilon kinase substrate motif;PKC kinase substrate motif;PKG kinase substrate…	RLS(0.994)NLPT(0.006)VDPIAVCHELYNTIR	124.82	0.994081	-0.0396514	0.131985	0.276398	NaN	0.12291	7.14261	124.82	3	887.779	-0.66206
Ptpn12	Tyrosine-protein phosphatase non-receptor type 12	S	434	1.08872	D	K	K	L	E	R	N	L	S	F	E	I	K	K	V	P	L	ESAIEHIDKKLERNLSFEIKKVPLQEGPKSF	P35831	434	14-3-3 domain binding motif;Calmodulin-dependent protein kinase II alpha substrate motif;Calmodulin-dependent protein kinase II substrate motif;Calmodulin-dependent protein kinase IV substrate motif;Casein kinase II substrate motif;Chk1 kinase substrate motif;PKA kinase substrate motif;PKC kinase substrate motif	NLS(1)FEIKK	66.19	1	0.485942	0.124196	-0.168385	0.0487852	0.122634	8.04187	164.97	2	529.768	-0.27463
Rbm10	RNA-binding protein 10	S	723	1.08871	K	L	A	S	D	D	R	P	S	P	P	R	G	L	V	A	A	HTSMDLPKLASDDRPSPPRGLVAAYSGESDS	Q99KG3;F8WGU1	723;646	Casein kinase I substrate motif;Cdc2 kinase substrate motif;CDK kinase substrate motif;CDK1,2,4,6 kinase substrate motif;DNA dependent Protein kinase substrate motif;ERK1,2 kinase substrate motif;GSK-3, ERK1, ERK2, CDK5 substrate motif;PKA kinase substrate motif;PKC kinase substrate motif;WW domain binding motif	LASDDRPS(1)PPR	73.386	0.999654	0.24123	0.208392	-0.0380147	0.0788531	0.122615	7.76049	88.338	2	645.796	-0.3212
Arhgap31	Rho GTPase-activating protein 31	T	666	1.08864	S	L	P	P	A	A	Q	K	T	S	P	I	P	E	S	S	P	ESEEEFSSLPPAAQKTSPIPESSPAPFPFPE	A6X8Z5;B2RSI0	666;666	G protein-coupled receptor kinase 1 substrate motif	T(0.86)S(0.139)PIPES(0.001)SPAPFPFPEAPGSLPSSSAPR	103.84	0.859849	NaN	-0.156097	0.236062	0.287624	0.12253	7.52617	139.04	3	963.123	0.0036323
Morc2a	MORC family CW-type zinc finger protein 2A	S	741	1.08863	G	R	K	R	S	L	A	V	S	D	E	E	E	A	E	E	E	KQSVATSGRKRSLAVSDEEEAEEEAEKRRER	Q69ZX6;Q6PCN6	741;679	BARD1 BRCT domain binding motif;Casein kinase II substrate motif;MAPKAPK2 kinase substrate motif	SLAVS(1)DEEEAEEEAEK	236.96	1	0.172743	0.385044	-0.0093472	-0.0583858	0.122514	8.16116	236.96	2	922.87	0.2008
Asap2	Arf-GAP with SH3 domain, ANK repeat and PH domain-containing protein 2	S	701	1.08841	L	L	H	E	D	L	D	E	S	D	D	D	V	D	E	K	L	HVEYEWRLLHEDLDESDDDVDEKLQPSPNRR	E9PX52;E9Q3P3;Q3UH27;Q6A074;Q3UH05;Q7SIG6;D3YX85;Q3TS63	701;701;701;716;704;704;701;313	b-Adrenergic Receptor kinase substrate motif;Casein kinase II substrate motif;Pyruvate dehydrogenase kinase substrate motif	LLHEDLDES(1)DDDVDEK	157.47	1	0.236217	0.338909	0.0158409	-0.102053	0.122228	8.2445	217.33	3	656.265	-0.26404
Eef2	Elongation factor 2	T	57	1.0884	A	R	A	G	E	T	R	F	T	D	T	R	K	D	E	Q	E	KAGIIASARAGETRFTDTRKDEQERCITIKS	P58252;Q3TK17;Q3TW58;Q3TWX1;Q3UBL9;Q3UDC8;Q8BMA8;Q6P9L9;Q3TJZ1;Q3TLB1;Q3TX47;Q3UZ14;Q3UMI7;Q8C153;O89069	57;57;57;57;57;57;57;42;57;57;57;57;57;57;49	PKA kinase substrate motif;PKC kinase substrate motif	AGETRFT(0.999)DT(0.001)RK	110.38	0.999318	0.390007	0.00173014	0.163365	-0.0662615	0.12221	9.03937	113.25	3	454.545	-0.03554
Bin1	Myc box-dependent-interacting protein 1	T	328	1.08819	A	S	G	A	S	P	G	A	T	I	P	K	S	P	S	Q	L	VNHEPEPASGASPGATIPKSPSQLRKGPPVP	O08539;Q6P1B9	328;297	G protein-coupled receptor kinase 1 substrate motif;MAPKAPK2 kinase substrate motif	VNHEPEPAS(0.002)GAS(0.146)PGAT(0.85)IPKS(0.747)PS(0.255)QLR	88.09	0.850316	0.0209111	0.0353423	0.30952	NaN	0.121925	7.37396	96.55	3	896.412	0.78464
Wbp11	WW domain-binding protein 11	S	237	1.08813	R	R	D	E	D	M	L	Y	S	P	E	L	A	Q	R	G	H	ALDLPPRRRDEDMLYSPELAQRGHDDDMSST	Q3U6Q1;Q3UKQ3;Q923D5;Q3TXH8;H7BWZ5	237;237;237;237;237	Casein kinase II substrate motif;ERK1,2 kinase substrate motif;G protein-coupled receptor kinase 1 substrate motif;GSK-3, ERK1, ERK2, CDK5 substrate motif;WW domain binding motif	RRDEDMLY(0.001)S(0.999)PELAQR	70.334	0.999369	NaN	-0.010643	0.0994327	0.276765	0.121851	7.46556	77.871	3	653.631	-0.25991
Prr14	Proline-rich protein 14	S	555	1.08783	R	A	V	E	F	R	D	S	S	L	P	R	S	R	R	P	S	TSSRKLRRAVEFRDSSLPRSRRPSRGVRTAA	Q7TPN9	555	14-3-3 domain binding motif;Calmodulin-dependent protein kinase II substrate motif;CLK1 kinase substrate motif;G protein-coupled receptor kinase 1 substrate motif;GSK3 kinase substrate motif;MDC1 BRCT domain binding motif;Phosphorylase kinase substrate motif;PKA kinase substrate motif;PKC kinase substrate motif;Plk1 PBD domain binding motif	AVEFRDS(0.001)S(0.999)LPR	72.891	0.99855	0.014641	0.00920381	0.249736	0.212216	0.121449	7.72673	72.891	2	678.819	-0.6601
Mtap4	Microtubule-associated protein;Microtubule-associated protein;Microtubule-associated protein 4;Microtubule-associated protein;Microtubule-associated protein;Microtubule-associated protein	T	658	1.08781	G	V	T	G	N	D	I	T	T	P	P	N	K	E	P	P	P	EEAKAAVGVTGNDITTPPNKEPPPSPEKKAK	E9PZ43;E9PWC0;P27546;E9QPW8;E9QKJ8;F7CK47	505;505;658;658;505;1119	Casein kinase I substrate motif;GSK-3, ERK1, ERK2, CDK5 substrate motif;WW domain binding motif	AAVGVTGNDIT(0.045)T(0.955)PPNKEPPPS(1)PEKK	109.65	0.954989	0.104068	-0.0317986	0.291998	NaN	0.121423	7.84973	112.55	3	902.093	-0.53257
Vim	Vimentin	S	419	1.08757	I	S	L	P	L	P	T	F	S	S	L	N	L	R	E	T	N	LEGEESRISLPLPTFSSLNLRETNLESLPLV	P20152;Q3U6S1;Q3UAX1;Q5FWJ3;E9PZV5;Q3TFD9;Q3UD36;Q3TWV0	419;419;419;419;406;419;358;419		ISLPLPT(0.001)FS(0.987)S(0.012)LNLR	220.64	0.986836	-0.0292199	-0.367788	0.536231	0.345198	0.121105	7.68968	264.28	2	819.437	0.80482
Larp7	La-related protein 7	S	256	1.08749	R	P	R	T	A	S	E	G	S	E	A	E	T	P	E	A	P	GLCKATKRPRTASEGSEAETPEAPKQPAKKK	I3PQW3;Q05CL8	256;256	Casein kinase II substrate motif;G protein-coupled receptor kinase 1 substrate motif	T(0.169)AS(0.832)EGS(0.999)EAET(0.001)PEAPKQPAK	99.454	0.99884	0.178492	-0.0323149	0.0820871	0.255736	0.121	8.10944	187.79	3	696.624	-0.23147
Wnk1	Serine/threonine-protein kinase WNK1	S	2000	1.0874	E	K	P	E	L	A	E	P	S	H	L	N	G	P	S	S	D	PAVIPKKEKPELAEPSHLNGPSSDLEAAFLS	P83741;Q6SLK2;F8WHP4;F7CZC4;F6U2S8	2000;1754;1752;365;21	DNA dependent Protein kinase substrate motif	KEKPELAEPS(0.921)HLNGPS(0.039)S(0.039)DLEAAFLSR	55.469	0.921489	0.347552	-0.0748208	-0.184344	0.39517	0.120889	7.43083	93.572	4	726.355	0.045321
Smarcc1	SWI/SNF complex subunit SMARCC1	S	329	1.08738	S	R	K	R	K	P	S	P	S	P	P	P	P	T	A	T	E	DRKASANSRKRKPSPSPPPPTATESRKKSGK	P97496;Q3UMX0;Q3UPK0;Q3UNN4;D3Z1X8;Q3UZD0	329;329;329;329;329;329	DNA dependent Protein kinase substrate motif;ERK1,2 kinase substrate motif;G protein-coupled receptor kinase 1 substrate motif;GSK-3, ERK1, ERK2, CDK5 substrate motif;PKA kinase substrate motif;WW domain binding motif	RKPS(1)PS(1)PPPPTATESR	94.45	1	0.0911243	0.4959	-0.0394191	-0.0641931	0.120853	8.38867	155.11	3	622.283	-0.96366
Mcm2	DNA replication licensing factor MCM2	S	41	1.08731	R	R	A	D	A	L	T	S	S	P	G	R	D	L	P	P	F	SSPGRSSRRADALTSSPGRDLPPFEDESEGL	Q3UJN1;P97310;Q3UK39	41;41;41	Cdc2 kinase substrate motif;CDK kinase substrate motif;CDK1,2,4,6 kinase substrate motif;ERK1,2 kinase substrate motif;Growth associated histone HI kinase substrate motif;GSK-3, ERK1, ERK2, CDK5 substrate motif;MDC1 BRCT domain binding motif;Plk1 PBD domain binding motif;WW domain binding motif	RADALTSS(1)PGR	125.67	0.999594	0.100843	0.302056	0.00335097	0.076828	0.120769	8.0505	160.8	2	605.782	-0.35619
Scaf1	Splicing factor, arginine/serine-rich 19	S	695	1.08722	V	L	Y	D	S	E	G	L	S	A	D	E	R	G	G	K	S	AVSPKREVLYDSEGLSADERGGKSDKDRRRS	Q5U4C3	695	Casein kinase I substrate motif;Casein kinase II substrate motif;MAPKAPK2 kinase substrate motif	REVLYDS(1)EGLS(1)ADER	166.91	1	0.145482	0.268434	-0.0524158	0.121079	0.120645	8.01469	171.5	2	949.882	0.26993
Hcfc1	Host cell factor 1;HCF N-terminal chain 1;HCF N-terminal chain 2;HCF N-terminal chain 3;HCF N-terminal chain 4;HCF N-terminal chain 5;HCF N-terminal chain 6;HCF C-terminal chain 1;HCF C-terminal chain 2;HCF C-terminal chain 3;HCF C-terminal chain 4;HCF C-terminal chain 5;HCF C-terminal chain 6	S	1848	1.08717	L	P	P	D	D	A	V	Q	S	D	D	D	S	G	T	V	P	VMVTHYFLPPDDAVQSDDDSGTVPDYNQLKK	Q61191;F6SJS2;B1AUX0;B1AUX2	1848;415;414;1893	Casein kinase II substrate motif;G protein-coupled receptor kinase 1 substrate motif;GSK3 kinase substrate motif;Pyruvate dehydrogenase kinase substrate motif	GTSVMVTHY(0.001)FLPPDDAVQS(0.918)DDDS(0.044)GT(0.036)VPDY(0.001)NQLK	54.097	0.917752	0.222681	0.363339	0.0174609	-0.121148	0.120583	7.98806	78.755	3	1236.54	0.13852
Prune2	Protein prune homolog 2	S	2710	1.08713	H	D	N	E	W	E	M	L	S	P	Q	L	S	R	K	N	R	VPTQAATHDNEWEMLSPQLSRKNRNPPQEME	Q52KR3	2710	Casein kinase I substrate motif;ERK1,2 kinase substrate motif;G protein-coupled receptor kinase 1 substrate motif;GSK3 kinase substrate motif;GSK-3, ERK1, ERK2, CDK5 substrate motif;WW domain binding motif	QGQAGLDAVPTQAAT(0.001)HDNEWEMLS(0.912)PQLS(0.086)R	95.19	0.912268	0.186627	0.246591	-0.0716254	NaN	0.120531	7.63031	134.28	3	1077.49	-0.17538
Srek1ip1	Protein SREK1IP1	S	144	1.08711	K	R	K	K	E	K	R	S	S	P	Y	H	S	E	L	T	K	HHKKEKKKRKKEKRSSPYHSELTKK______	Q4V9W2	144	Casein kinase I substrate motif;ERK1,2 kinase substrate motif;G protein-coupled receptor kinase 1 substrate motif;GSK3 kinase substrate motif;GSK-3, ERK1, ERK2, CDK5 substrate motif;MDC1 BRCT domain binding motif;PAK2 kinase substrate motif;PKA kinase substrate motif;PKC kinase substrate motif;Plk1 PBD domain binding motif;WW domain binding motif	RS(0.014)S(0.983)PY(0.003)HSELTK	97.86	0.982809	0.31371	0.139993	-0.0922074	NaN	0.120499	7.40618	119.96	3	462.213	-0.049681
Ugdh	UDP-glucose 6-dehydrogenase;UDP-glucose 6-dehydrogenase;UDP-glucose 6-dehydrogenase;UDP-glucose 6-dehydrogenase;UDP-glucose 6-dehydrogenase;UDP-glucose 6-dehydrogenase;UDP-glucose 6-dehydrogenase	T	474	1.0871	V	S	S	K	R	I	P	Y	T	P	G	E	I	P	K	F	S	IETIGKKVSSKRIPYTPGEIPKFSLQDPPNK	O70475;Q3TJE8;Q3TS38;Q3UIZ1;D3Z3F7;Q3TJ71;Q3TI06	474;474;474;474;407;474;415	Casein kinase II substrate motif;ERK1,2 kinase substrate motif;GSK3, Erk1, Erk2 and CDK5 kinase motif;GSK-3, ERK1, ERK2, CDK5 substrate motif;WW domain binding motif	RIPYT(1)PGEIPK	119.32	0.999987	0.144699	0.152248	-0.00992037	0.194906	0.120483	7.74087	119.32	2	675.845	0.24667
Ubap2l	Ubiquitin-associated protein 2-like	S	627	1.08685	T	R	R	Y	P	S	S	I	S	S	S	P	Q	K	D	L	T	YEQRSTQTRRYPSSISSSPQKDLTQAKNGFS	Q80X50;E9Q9Q3;Q8BJ53;Q812D5;Q812D4;E9PZA1;Q3TSB0;Q80U73	627;607;607;607;607;103;11;128	Casein kinase II substrate motif	RYPS(0.002)S(0.014)IS(0.958)S(0.022)S(0.004)PQKDLTQAK	81.656	0.958021	NaN	0.274292	0.964686	-0.878529	0.120149	8.02127	131.33	3	691.672	0.37298
Marcksl1	MARCKS-related protein	S	104	1.08674	K	P	F	K	L	S	G	L	S	F	K	R	N	R	K	E	G	KKKFSFKKPFKLSGLSFKRNRKEGGGDSSAS	B2KGE6;P28667	104;104	PKA kinase substrate motif;PKC kinase substrate motif	LS(1)GLS(1)FKR	86.114	1	0.325271	-1.56824	1.22864	0.494353	0.120006	8.47983	147.91	2	534.238	0.11662
Atrx	Transcriptional regulator ATRX	S	92	1.08633	S	I	V	T	K	Y	V	E	S	D	D	E	K	P	T	D	E	SRSKRKPSIVTKYVESDDEKPTDENVNEKAA	Q3TA30;Q61687;E9QAC3;F6RDB7;A6PWK6;Q8BSH0;Q8C2S3;Q3UY26;A6PWK8;A6PWK7;A6PWK9	107;92;36;20;19;19;53;53;37;37;37	b-Adrenergic Receptor kinase substrate motif;BARD1 BRCT domain binding motif;Casein kinase II substrate motif;PKA kinase substrate motif	YVES(1)DDEKPTDENVNEK	277.25	1	0.198745	-0.00685463	0.203518	0.0824384	0.119462	8.99789	281.07	2	1045.93	0.0625
Ptrf	Polymerase I and transcript release factor	S	205	1.08633	D	T	A	A	I	E	L	S	S	D	E	A	V	E	V	E	E	EGERPEDDTAAIELSSDEAVEVEEVIEESRA	O54724	205	Casein kinase I substrate motif;Casein kinase II substrate motif;MDC1 BRCT domain binding motif;Plk1 PBD domain binding motif	ES(0.001)EALPEKEGDELGEGERPEDDT(0.009)AAIELS(0.995)S(0.995)DEAVEVEEVIEESR	52.627	0.994893	0.175812	0.245009	0.0533888	0.00362565	0.119459	9.09517	64.72	4	1244.78	0.51649
Polr2a	DNA-directed RNA polymerase II subunit RPB1;DNA-directed RNA polymerase	S	1878	1.08627	T	S	P	K	Y	S	P	T	S	P	T	Y	S	P	T	T	P	TSPKYSPTSPKYSPTSPTYSPTTPKYSPTSP	P08775;O08847	1878;1878	Casein kinase I substrate motif;Casein kinase II substrate motif;ERK1,2 kinase substrate motif;G protein-coupled receptor kinase 1 substrate motif;GSK3 kinase substrate motif;GSK-3, ERK1, ERK2, CDK5 substrate motif;WW domain binding motif	YS(0.003)PT(0.006)S(0.99)PTYSPTTPK	169.02	0.990409	NaN	0.0802483	0.0867832	0.191129	0.119387	7.66549	169.02	2	803.855	-1.1087
Nfib	Nuclear factor 1 B-type;Nuclear factor 1;Nuclear factor 1;Nuclear factor 1;Nuclear factor 1;Nuclear factor 1	S	332	1.08583	F	S	S	T	S	P	Q	D	S	S	P	R	L	S	T	F	P	KKPEKPLFSSTSPQDSSPRLSTFPQHHHPGI	P97863;F8WHI4;Q6GSP7;Q8C434;Q8BN68;F8WIX3	332;332;332;332;332;332	b-Adrenergic Receptor kinase substrate motif;MAPKAPK2 kinase substrate motif	KPEKPLFS(0.005)S(0.014)T(0.168)S(0.809)PQDS(0.544)S(0.46)PR	62.847	0.544316	0.227248	0.316146	NaN	-0.187007	0.118795	7.65159	135.23	3	716.652	-0.26386
Mtap1a	Microtubule-associated protein 1A;MAP1 light chain LC2	S	1985	1.08559	E	V	E	R	W	L	A	E	S	P	V	G	L	P	P	E	E	PLPQKGLEVERWLAESPVGLPPEEEDKLTRS	A2ARP8;Q9QYR6	1985;1747	b-Adrenergic Receptor kinase substrate motif;ERK1,2 kinase substrate motif;GSK-3, ERK1, ERK2, CDK5 substrate motif;WW domain binding motif	WLAES(1)PVGLPPEEEDKLTR	93.51	0.999999	0.0251707	0.0453032	0.284968	NaN	0.118481	7.58757	93.51	3	749.363	-0.2136
G3bp1	Ras GTPase-activating protein-binding protein 1	S	189	1.08558	F	V	T	E	P	Q	E	E	S	E	E	E	V	E	E	P	E	QDEVFGGFVTEPQEESEEEVEEPEERQQTPE	Q571F9;P97855;Q5NCU1;Q3UR88	189;149;149;149	b-Adrenergic Receptor kinase substrate motif;BARD1 BRCT domain binding motif;Casein kinase II substrate motif;G protein-coupled receptor kinase 1 substrate motif	YQDEVFGGFVTEPQEES(1)EEEVEEPEER	152.66	1	0.0106367	0.157303	0.172831	0.133116	0.118472	9.28773	183.01	3	1099.45	0.38863
Ahnak2		S	841	1.08548	E	K	G	R	S	R	K	L	S	F	S	M	P	R	L	A	L	APLEKDVEKGRSRKLSFSMPRLALPKIKVSK	F7DBB3;Q3URZ6	841;35	14-3-3 domain binding motif;Akt kinase substrate motif;Calmodulin-dependent protein kinase II substrate motif;Casein kinase II substrate motif;G protein-coupled receptor kinase 1 substrate motif;MAPKAPK1 kinase substrate motif;MAPKAPK2 kinase substrate motif;PKA kinase substrate motif;PKC epsilon kinase substrate motif;PKC kinase substrate motif	KLS(1)FSMPR	92.866	0.999954	0.329526	-0.687892	0.238255	0.593441	0.118332	7.97776	125.82	2	523.249	-0.36213
Asap1	Arf-GAP with SH3 domain, ANK repeat and PH domain-containing protein 1	S	854	1.08547	P	P	G	H	K	R	T	L	S	D	P	P	S	P	L	P	H	KKRPPPPPPGHKRTLSDPPSPLPHGPPNKGA	Q505F0;Q9QWY8;H3BJY2;H3BLA8;E9QN63;H3BL41;E9QMJ1	854;854;851;842;834;831;819	14-3-3 domain binding motif;Calmodulin-dependent protein kinase II substrate motif;G protein-coupled receptor kinase 1 substrate motif;GSK3 kinase substrate motif;PKA kinase substrate motif;PKC kinase substrate motif	T(0.007)LS(0.993)DPPS(1)PLPHGPPNK	38.824	0.993249	0.0705267	-0.124047	0.429168	0.0976253	0.118318	8.09951	148.36	3	605.269	0.52639
Srrm2	Serine/arginine repetitive matrix protein 2	S	1647	1.0854	H	T	P	P	R	R	R	S	S	R	S	S	P	E	L	T	R	IEPKTKSHTPPRRRSSRSSPELTRKARVSRR	Q8BTI8	1647	14-3-3 domain binding motif;Calmodulin-dependent protein kinase II substrate motif;Casein kinase I substrate motif;Casein kinase II substrate motif;G protein-coupled receptor kinase 1 substrate motif;MAPKAPK1 kinase substrate motif;MDC1 BRCT domain binding motif;PAK2 kinase substrate motif;Pim1 kinase substrate sequence;PKA kinase substrate motif;PKC epsilon kinase substrate motif;PKC kinase subs…	S(0.038)S(0.962)RS(0.323)S(0.677)PELTR	106.82	0.961854	0.294077	-0.829613	0.436881	0.571557	0.118225	7.63102	106.82	2	640.258	0.37553
Sfr1	Swi5-dependent recombination DNA repair protein 1 homolog	T	70	1.08518	R	E	N	P	P	S	P	P	T	S	P	A	A	P	Q	P	R	SPAVPQTRENPPSPPTSPAAPQPRENPPSPP	Q8BP27;E3WH30	70;54	DNA dependent Protein kinase substrate motif;G protein-coupled receptor kinase 1 substrate motif	ENPPS(0.007)PPT(0.997)S(0.996)PAAPQPR	178.51	0.997066	0.24306	0.139339	0.240162	-0.15082	0.117935	9.3331	219.66	3	601.589	0.48882
Ppp1r2	Protein phosphatase inhibitor 2	Y	87	1.08463	M	I	G	D	D	E	D	A	Y	S	D	S	E	G	N	E	V	PNTPYHNMIGDDEDAYSDSEGNEVMTPDILA	Q9DCL8;D3Z3A0;Q9CT86;Q8BVM6	87;87;46;91	ALK kinase substrate motif;SHP1 phosphatase substrate motif;Src kinase substrate motif	IDEPNT(0.001)PY(0.05)HNMIGDDEDAY(0.868)S(0.063)DS(0.019)EGNEVMTPDILAK	86.191	0.86759	0.0978804	NaN	0.161395	0.0923402	0.117205	8.26649	93.596	3	1336.55	-0.17732
Srrm1	Serine/arginine repetitive matrix protein 1	S	758	1.08448	K	I	K	K	A	A	S	P	S	P	Q	S	V	R	R	V	S	SRTPEPKKIKKAASPSPQSVRRVSSSRSVSG	E9PUK6;A2A8V9;Q52KI8;E9QKA4;A2A8V8	758;753;781;758;744	Casein kinase I substrate motif;Casein kinase II substrate motif;DNA dependent Protein kinase substrate motif;ERK1,2 kinase substrate motif;GSK-3, ERK1, ERK2, CDK5 substrate motif;WW domain binding motif	AAS(1)PS(1)PQSVR	96.866	0.99992	0.177727	0.166587	NaN	0.00668065	0.116998	7.88385	173.51	2	580.231	-0.10195
Sntb2	Beta-2-syntrophin	S	213	1.08446	F	S	G	S	E	D	S	G	S	P	K	H	Q	N	T	T	K	ASPQSPSFSGSEDSGSPKHQNTTKDRKVIPL	B7ZNU9;Q3V2N5;Q542S9;Q61235	213;213;213;213	Casein kinase I substrate motif;ERK1,2 kinase substrate motif;Growth associated histone HI kinase substrate motif;GSK-3, ERK1, ERK2, CDK5 substrate motif;PKA kinase substrate motif;PKC kinase substrate motif;WW domain binding motif	KPSLVSDLPWEGASPQSPSFS(0.001)GS(0.004)EDS(0.058)GS(0.937)PK	161.2	0.936746	-0.174784	NaN	0.320018	0.205713	0.116982	7.88925	199.87	3	1047.47	0.19214
Pla2g4a	Cytosolic phospholipase A2;Phospholipase A2;Lysophospholipase	S	437	1.08395	I	V	S	N	D	S	S	D	S	D	D	E	A	Q	G	P	K	ENITAKHIVSNDSSDSDDEAQGPKGTENEEA	P47713;Q3UMQ1;Q9DBX5	437;437;429	b-Adrenergic Receptor kinase substrate motif;BARD1 BRCT domain binding motif;Casein kinase II substrate motif;G protein-coupled receptor kinase 1 substrate motif	HIVSNDSSDS(1)DDEAQGPK	210.43	0.999996	0.309176	0.0628125	0.127431	-0.0342158	0.116301	8.75785	296.78	3	660.932	0.082997
Dek	Protein DEK	S	33	1.08378	E	M	P	G	P	R	E	E	S	E	E	E	E	E	D	D	E	PSSEKEPEMPGPREESEEEEEDDEDDDEEDE	Q7TNV0;D3YVJ6;E9Q8P4;E9Q8Y1;Q3U4W4	33;33;33;33;33	14-3-3 domain binding motif;b-Adrenergic Receptor kinase substrate motif;BARD1 BRCT domain binding motif;Calmodulin-dependent protein kinase II substrate motif;Casein kinase II substrate motif;G protein-coupled receptor kinase 1 substrate motif;PKA kinase substrate motif;PKC epsilon kinase substrate motif;PKC kinase substrate motif	EES(1)EEEEEDDEDDDEEDEEEEKEK	86.617	1	0.0164963	-0.028381	0.294279	0.181869	0.116066	8.08382	151.89	3	1023.34	-0.029967
Pwp1	Periodic tryptophan protein 1 homolog	S	49	1.08368	G	K	L	Q	E	E	G	G	S	E	E	E	E	A	G	N	P	RLIAEAKGKLQEEGGSEEEEAGNPSEDGMQS	Q99LL5;E9QAL6	49;49	BARD1 BRCT domain binding motif;Casein kinase I substrate motif;Casein kinase II substrate motif;G protein-coupled receptor kinase 1 substrate motif	LQEEGGS(1)EEEEAGNPSEDGMQSGPTQAPPR	91.776	1	0.120086	0.128689	-0.0416635	0.256666	0.115945	8.03238	114.2	3	1070.43	0.39442
Fam54b	Protein FAM54B	S	234	1.08351	D	C	I	S	L	S	K	A	S	S	F	A	D	M	M	G	I	CSSSEEDDCISLSKASSFADMMGILKDFHRI	Q9CWE0	234	PKA kinase substrate motif;PKC kinase substrate motif	AS(0.654)S(0.346)FADMMGILK	96.591	0.654053	0.292664	0.0843364	0.081171	0.00465305	0.115706	7.61189	96.591	2	683.793	-0.22319
Phf3		S	249	1.08349	N	Q	G	E	V	N	V	P	S	P	E	L	D	C	P	L	L	DPKHACNNQGEVNVPSPELDCPLLSETSASV	A0PJJ1;B2RQG2	249;249	Casein kinase II substrate motif;DNA dependent Protein kinase substrate motif;ERK1,2 kinase substrate motif;GSK-3, ERK1, ERK2, CDK5 substrate motif;WW domain binding motif	HACNNQGEVNVPS(1)PELDCPLLSETSASVEEK	96.123	0.999892	-0.106032	-0.0456697	0.353856	0.260567	0.11568	7.55283	96.123	3	1164.18	-0.46628
Irf2bp1	Interferon regulatory factor 2-binding protein 1	S	436	1.08336	N	V	A	E	A	L	G	H	S	P	K	D	P	G	G	G	G	SPIAALKNVAEALGHSPKDPGGGGGSVRAGG	Q8R3Y8	436	Casein kinase II substrate motif;ERK1,2 kinase substrate motif;G protein-coupled receptor kinase 1 substrate motif;Growth associated histone HI kinase substrate motif;GSK-3, ERK1, ERK2, CDK5 substrate motif;PKA kinase substrate motif;PKC kinase substrate motif;Pyruvate dehydrogenase kinase substrate motif;WW domain binding motif	NVAEALGHS(1)PKDPGGGGGSVR	120.31	1	0.391658	0.0903115	0.025779	-0.0457225	0.115506	8.17733	128.79	3	681.32	-0.61489
Kdm1a	Lysine-specific histone demethylase 1A	S	70	1.08332	R	K	K	E	P	P	R	A	S	P	P	G	G	L	A	E	P	AAGERTPRKKEPPRASPPGGLAEPPGSAGPQ	Q6ZQ88;A3KG93	70;70	ERK1,2 kinase substrate motif;GSK-3, ERK1, ERK2, CDK5 substrate motif;PKA kinase substrate motif;PKC kinase substrate motif;WW domain binding motif	KEPPRAS(0.932)PPGGLAEPPGS(0.043)AGPQAGPT(0.016)AGPGS(0.007)AT(0.002)PMETGIAETPEGR	40.491	0.931842	NaN	0.119423	0.0552914	0.171661	0.115458	7.66572	56.387	4	1108.02	-0.11005
Med1	Mediator of RNA polymerase II transcription subunit 1	T	1051	1.08331	P	G	S	S	G	R	S	Q	T	P	P	G	V	A	T	P	P	STGGSKSPGSSGRSQTPPGVATPPIPKITIQ	Q925J9	1051	14-3-3 domain binding motif;Calmodulin-dependent protein kinase II substrate motif;GSK-3, ERK1, ERK2, CDK5 substrate motif;PKC kinase substrate motif;WW domain binding motif	SQT(1)PPGVATPPIPK	146.88	0.999674	0.157691	-0.00138564	0.0273661	0.278111	0.115446	7.70969	160.43	2	735.374	0.42984
Rsf1		S	1347	1.08311	S	K	K	P	Y	R	I	E	S	D	E	E	E	D	F	E	N	LPSEQESSKKPYRIESDEEEDFENKVGSPLD	E9Q4Y2;E9PWW9	1347;1332	14-3-3 domain binding motif;b-Adrenergic Receptor kinase substrate motif;BARD1 BRCT domain binding motif;Calmodulin-dependent protein kinase II substrate motif;Casein kinase II substrate motif;PKA kinase substrate motif;PKC kinase substrate motif	IES(1)DEEEDFENK	201.3	1	0.491802	0.32008	-0.166972	-0.184217	0.115173	8.11644	240.46	2	782.29	0.36875
Bclaf1	Bcl-2-associated transcription factor 1	S	267	1.08287	Q	H	S	H	S	I	Q	H	S	P	E	R	S	G	S	G	S	SAKNTPSQHSHSIQHSPERSGSGSVGNGSSR	Q8K019;F8WI22;Q3UDL9;Q3UR37;H7BX81;Q3TSZ0;Q3TRC6;E9Q5V0;Q05C67	267;267;267;265;267;267;267;267;267	Casein kinase I substrate motif;Casein kinase II substrate motif;Cdc2 kinase substrate motif;CDK kinase substrate motif;CDK1,2,4,6 kinase substrate motif;ERK1,2 kinase substrate motif;G protein-coupled receptor kinase 1 substrate motif;GSK3 kinase substrate motif;GSK-3, ERK1, ERK2, CDK5 substrate motif;MAPKAPK2 kinase substrate motif;WW domain binding motif	NTPSQHSHSIQHS(1)PER	187.47	0.999999	0.0750534	0.00273846	0.186738	0.194889	0.114855	8.69228	259.77	2	961.419	-0.52928
Pdha1	Pyruvate dehydrogenase E1 component subunit alpha, somatic form, mitochondrial	S	300	1.08261	H	S	M	S	D	P	G	V	S	Y	R	T	R	E	E	I	Q	QTYRYHGHSMSDPGVSYRTREEIQEVRSKSD	P35486;Q3UFJ3	300;300	Casein kinase I substrate motif;Casein kinase II substrate motif;PKA kinase substrate motif;PKC kinase substrate motif	YHGHS(1)MSDPGVS(1)YR	142.88	0.999996	-0.424378	-1.06428	1.08985	0.856868	0.114514	8.66028	149.47	2	876.815	-0.36033
Denr	Density-regulated protein	T	78	1.08245	V	E	N	S	P	K	Q	E	T	G	I	T	E	G	Q	G	P	NEFAKLTVENSPKQETGITEGQGPVGEEEEK	Q9CQJ6;E9Q0G1	78;78	b-Adrenergic Receptor kinase substrate motif;Casein kinase I substrate motif;PKA kinase substrate motif;PKC kinase substrate motif	LT(0.034)VENS(0.034)PKQET(0.931)GIT(0.001)EGQGPVGEEEEK	145.65	0.930543	-0.0878407	0.172103	NaN	0.258649	0.114304	7.63669	186.92	3	955.773	0.17676
Ank2	Ankyrin-2	S	819	1.08219	T	M	T	E	V	L	D	V	S	D	E	E	G	D	D	T	V	HKLNVPETMTEVLDVSDEEGDDTVTGDGGEY	F7CK09;E9PW46;Q8C8R3;E9Q2E1;F6S5N7	819;855;846;846;792	BARD1 BRCT domain binding motif;Casein kinase II substrate motif	LNVPETMTEVLDVS(0.999)DEEGDDT(0.001)VTGDGGEYLRPEDLK	89.024	0.998853	0.203264	0.350045	-0.299596	0.202091	0.113951	8.31433	89.024	3	1339.93	0.55581
Irf2bp1	Interferon regulatory factor 2-binding protein 1	S	453	1.08217	G	S	V	R	A	G	G	A	S	P	A	A	S	S	T	T	Q	KDPGGGGGSVRAGGASPAASSTTQPPAQHRL	Q8R3Y8	453	Casein kinase I substrate motif;ERK1,2 kinase substrate motif;G protein-coupled receptor kinase 1 substrate motif;GSK3 kinase substrate motif;GSK-3, ERK1, ERK2, CDK5 substrate motif;WW domain binding motif	AGGAS(1)PAASSTTQPPAQHR	125.73	0.999999	0.260267	-0.0772997	0.166519	0.106203	0.113922	7.81852	152.47	2	936.423	0.84234
Dock7	Dedicator of cytokinesis protein 7	S	1428	1.08212	S	P	S	G	S	A	F	G	S	Q	E	N	L	R	W	R	K	SRGQLERSPSGSAFGSQENLRWRKDMTHWRQ	Q8R1A4;A2A9M5;E9PX48;A2A9M4;Q3U806	1428;1428;1398;25;9	ATM kinase substrate motif;Casein kinase II substrate motif;DNA dependent Protein kinase substrate motif;MAPKAPK2 kinase substrate motif	SPSGSAFGS(1)QENLR	89.374	0.999991	-0.327131	-0.903711	1.07163	0.614668	0.113865	7.41212	108.75	2	758.825	-0.22413
Tenc1	Tensin-like C1 domain-containing phosphatase	S	835	1.08189	R	A	G	S	V	S	P	G	S	P	P	Y	L	Q	P	R	K	SPGAHSPRAGSVSPGSPPYLQPRKLGYEISA	Q8CGB6	835	Casein kinase II substrate motif;ERK1,2 kinase substrate motif;GSK-3, ERK1, ERK2, CDK5 substrate motif;WW domain binding motif	AGSVSPGS(1)PPYLQPR	108.18	0.999851	0.400647	0.524164	-0.296428	-0.174151	0.113558	7.43943	136.39	2	796.877	0.29626
Tjp1	Tight junction protein ZO-1	Y	132	1.0818	V	S	D	N	E	D	D	S	Y	D	E	E	V	H	D	P	R	SHPDPEPVSDNEDDSYDEEVHDPRAGRGALA	B9EHJ3;P39447	132;132	ALK kinase substrate motif;Cbl PTB domain binding motif;Shb PTB domain binding motif;SHP1 phosphatase substrate motif;Src kinase substrate motif	VQIPVSHPDPEPVS(0.079)DNEDDS(0.935)Y(0.986)DEEVHDPR	94.838	0.985536	0.1644	0.0962619	-0.0309717	0.224064	0.113439	8.8231	146.75	3	1159.47	0.4872
Bclaf1	Bcl-2-associated transcription factor 1	S	383	1.08129	D	Q	E	V	L	D	Y	F	S	D	K	E	S	A	K	Q	K	RADGDWDDQEVLDYFSDKESAKQKFHDSEGD	Q8K019;F8WI22;Q3UDL9;Q3UR37;H7BX81;Q3TSZ0;Q3TRC6;E9Q5V0;Q05C67	383;383;383;381;383;383;383;383;383	Casein kinase I substrate motif;Casein kinase II substrate motif;G protein-coupled receptor kinase 1 substrate motif;GSK3 kinase substrate motif;PKA kinase substrate motif;PKC kinase substrate motif	GRADGDWDDQEVLDYFS(1)DKESAK	148.04	0.999976	0.207393	0.067088	0.154008	0.022537	0.112757	9.02906	211.98	3	909.38	-0.23857
Mprip	Myosin phosphatase Rho-interacting protein	S	292	1.08124	L	P	P	L	L	S	P	P	S	P	S	T	P	H	S	R	R	DLRAEEQLPPLLSPPSPSTPHSRRSQVIEKF	P97434;F6RND9;Q5SWZ6;Q5SWZ5;F6S5I0;Q8C8T6	292;160;160;292;139;292	Casein kinase I substrate motif;Casein kinase II substrate motif;DNA dependent Protein kinase substrate motif;ERK1,2 kinase substrate motif;G protein-coupled receptor kinase 1 substrate motif;GSK-3, ERK1, ERK2, CDK5 substrate motif;WW domain binding motif	AEEQLPPLLSPPS(0.976)PS(0.012)T(0.012)PHSR	181.81	0.975917	-0.115738	-0.136791	0.453933	0.249342	0.112686	8.06722	181.81	2	1110.54	0.062747
Usp1	Ubiquitin carboxyl-terminal hydrolase 1	S	474	1.08092	K	V	E	E	S	S	E	I	S	P	E	P	K	T	E	M	K	VQEDELSKVEESSEISPEPKTEMKTLRWAIS	Q8BJQ2	474	Casein kinase II substrate motif;ERK1,2 kinase substrate motif;GSK-3, ERK1, ERK2, CDK5 substrate motif;MAPKAPK2 kinase substrate motif;WW domain binding motif	VEESSEIS(1)PEPK	172.82	0.999999	-0.16707	NaN	0.235365	0.268487	0.112261	7.61669	193.96	2	705.805	0.17756
Rlim	E3 ubiquitin-protein ligase RLIM	S	229	1.08089	R	A	R	A	E	R	S	R	S	P	L	Q	P	T	S	E	I	SPEHRRTRARAERSRSPLQPTSEIPRRAPTL	Q9WTV7	229	14-3-3 domain binding motif;Calmodulin-dependent protein kinase II substrate motif;ERK1,2 kinase substrate motif;G protein-coupled receptor kinase 1 substrate motif;Growth associated histone HI kinase substrate motif;GSK-3, ERK1, ERK2, CDK5 substrate motif;PKA kinase substrate motif;PKC kinase substrate motif;WW domain binding motif	SRS(1)PLQPTSEIPR	140.8	0.999946	0.0194884	-0.256287	0.206379	0.479291	0.112218	8.17502	187.78	2	774.383	-0.1109
Rbm17	Splicing factor 45	S	155	1.08046	F	S	R	R	P	D	P	D	S	D	E	D	E	D	Y	E	R	DRHEASGFSRRPDPDSDEDEDYERERRKRSM	Q8JZX4	155	b-Adrenergic Receptor kinase substrate motif;Casein kinase I substrate motif;Casein kinase II substrate motif;Pyruvate dehydrogenase kinase substrate motif	RPDPDS(1)DEDEDYERER	209.9	1	0.237074	0.0507454	0.0883161	0.0704361	0.111643	8.44523	209.9	2	1051.9	0.65666
Dhx16		S	155	1.08036	K	R	K	A	G	G	S	K	S	P	T	E	E	K	P	A	S	EEVSESGKRKAGGSKSPTEEKPASEDEWERT	G3X8X0;Q921Y1;Q80TX4;Q05BH3	155;155;157;155	Casein kinase II substrate motif;ERK1,2 kinase substrate motif;Growth associated histone HI kinase substrate motif;GSK-3, ERK1, ERK2, CDK5 substrate motif;WW domain binding motif	AGGS(0.013)KS(0.987)PTEEKPAS(1)EDEWER	113.5	0.986741	0.204892	0.0881415	0.097008	0.0559963	0.111509	7.63306	113.5	3	783.981	-0.33947
Sfr1	Swi5-dependent recombination DNA repair protein 1 homolog	S	67	1.08032	P	Q	T	R	E	N	P	P	S	P	P	T	S	P	A	A	P	PPTSPAVPQTRENPPSPPTSPAAPQPRENPP	Q8BP27;E3WH30	67;51	Casein kinase I substrate motif;Casein kinase II substrate motif;DNA dependent Protein kinase substrate motif;ERK1,2 kinase substrate motif;G protein-coupled receptor kinase 1 substrate motif;GSK3 kinase substrate motif;GSK-3, ERK1, ERK2, CDK5 substrate motif;WW domain binding motif	ENPPS(1)PPT(0.936)S(0.064)PAAPQPR	215.51	0.999999	0.19774	0.0749164	0.201892	-0.0287106	0.111459	9.35472	219.66	2	901.879	0.2708
Skiv2l		S	253	1.08021	G	T	P	L	V	R	A	S	S	L	E	D	L	V	L	K	E	NASPSPSGTPLVRASSLEDLVLKEAATVVST	Q3TW36;Q6NZR5;Q8CDP6;O70349;Q3TE28	253;253;253;245;253	14-3-3 domain binding motif;AMP-activated protein kinase substrate motif;Calmodulin-dependent protein kinase I substrate motif;Calmodulin-dependent protein kinase II alpha substrate motif;Calmodulin-dependent protein kinase II substrate motif;Calmodulin-dependent protein kinase IV substrate motif;Casein kinase II substrate motif;Chk1 kinase substrate motif;HMGCoA Reductase kinase substrate motif;…	ASS(1)LEDLVLK	222.25	0.999637	0.274172	0.204391	0.00958245	-0.0429245	0.111305	8.39533	222.25	2	577.789	-0.24514
Bclaf1	Bcl-2-associated transcription factor 1	S	284	1.07966	V	G	N	G	S	S	R	Y	S	P	S	Q	N	S	P	I	H	ERSGSGSVGNGSSRYSPSQNSPIHHIPSRRS	Q8K019;F8WI22;Q3UDL9;Q3UR37;H7BX81;Q3TSZ0;Q3TRC6;E9Q5V0;Q05C67	284;284;284;282;284;284;284;284;284	Casein kinase II substrate motif;ERK1,2 kinase substrate motif;GSK-3, ERK1, ERK2, CDK5 substrate motif;MAPKAPK2 kinase substrate motif;PKA kinase substrate motif;PKC kinase substrate motif;WW domain binding motif	Y(0.08)S(0.919)PS(0.607)QNS(0.383)PIHHIPS(0.01)R	63.46	0.919054	0.0180643	-0.0560412	0.208728	0.271583	0.110583	7.88104	68.525	3	627.268	-0.28956
Palld	Palladin	S	1143	1.07965	H	A	R	R	P	R	S	R	S	R	D	S	G	D	E	N	E	RSPSGHPHARRPRSRSRDSGDENEPIQERFF	Q9ET54;Q8C306;D3Z1J5	1143;293;187	14-3-3 domain binding motif;Akt kinase substrate motif;Calmodulin-dependent protein kinase II substrate motif;Casein kinase I substrate motif;Casein kinase II substrate motif;MAPKAPK1 kinase substrate motif;PKA kinase substrate motif;PKC kinase substrate motif	S(1)RS(1)RDS(1)GDENEPIQER	95.5	1	0.0788831	-0.0860172	NaN	0.338816	0.110561	7.46827	95.5	3	705.591	-0.22657
Palld	Palladin	S	1141	1.07965	H	P	H	A	R	R	P	R	S	R	S	R	D	S	G	D	E	SPRSPSGHPHARRPRSRSRDSGDENEPIQER	Q9ET54;Q8C306;D3Z1J5	1141;291;185	14-3-3 domain binding motif;Calmodulin-dependent protein kinase II substrate motif;Casein kinase II substrate motif;CLK1 kinase substrate motif;PKA kinase substrate motif;PKC kinase substrate motif;ZIP kinase substrate motif	S(1)RS(1)RDS(1)GDENEPIQER	95.5	1	0.0788831	-0.0860172	NaN	0.338816	0.110561	7.46827	95.5	3	705.591	-0.22657
Mdn1	Midasin	S	4883	1.07947	L	K	L	D	S	E	D	K	S	G	G	E	D	T	D	N	E	ALDLPDDLKLDSEDKSGGEDTDNEEAEEENP	A2ANY6	4883	Casein kinase I substrate motif;Casein kinase II substrate motif;MAPKAPK2 kinase substrate motif	LDS(0.002)EDKS(0.999)GGEDT(1)DNEEAEEENPLEIKEK	119.52	0.998572	-0.170037	0.184344	0.0592393	0.367769	0.110329	7.72114	119.52	3	1103.77	0.42533
Mdn1	Midasin	T	4888	1.07947	E	D	K	S	G	G	E	D	T	D	N	E	E	A	E	E	E	DDLKLDSEDKSGGEDTDNEEAEEENPLEIKE	A2ANY6	4888	b-Adrenergic Receptor kinase substrate motif;Casein kinase II substrate motif	LDS(0.002)EDKS(0.999)GGEDT(1)DNEEAEEENPLEIKEK	119.52	0.999925	-0.170037	0.184344	0.0592393	0.367769	0.110329	7.72114	119.52	3	1103.77	0.42533
Prkaca	cAMP-dependent protein kinase catalytic subunit alpha;cAMP-dependent protein kinase catalytic subunit beta	T	196	1.07924	F	A	K	R	V	K	G	R	T	W	T	L	C	G	T	P	E	IQVTDFGFAKRVKGRTWTLCGTPEYLAPEII	P05132;P68181	196;196	PKA kinase substrate motif;PKC kinase substrate motif	T(0.932)WT(0.068)LCGTPEYLAPEIILSK	251.69	0.932136	-0.456148	-0.501688	0.782968	0.614911	0.110011	7.89839	251.69	2	1136.55	-0.31863
Thrap3	Thyroid hormone receptor-associated protein 3	S	669	1.07908	Q	E	A	A	K	N	K	K	S	P	E	I	H	R	R	I	D	YLKRGNEQEAAKNKKSPEIHRRIDISPSTFR	A2AJI4;Q569Z6;Q8BZN7;Q91VL2;F6YH92	669;669;669;283;33	Casein kinase II substrate motif;ERK1,2 kinase substrate motif;Growth associated histone HI kinase substrate motif;GSK-3, ERK1, ERK2, CDK5 substrate motif;PKA kinase substrate motif;PKC kinase substrate motif;WW domain binding motif	KS(1)PEIHRR	44.863	1	0.314058	0.0553346	NaN	-0.0399806	0.109804	7.95375	100.88	3	368.189	-0.18914
Tnks1bp1	182 kDa tankyrase-1-binding protein	S	545	1.07899	P	E	S	P	R	K	P	I	S	G	V	Q	G	N	D	P	G	GPGTPPAPESPRKPISGVQGNDPGISLPQRD	B9EKJ7;P58871	545;545	PKA kinase substrate motif;PKC kinase substrate motif	GEGVS(0.014)QVGPGT(0.984)PPAPES(0.061)PRKPIS(0.941)GVQGNDPGISLPQR	86.722	0.941099	0.238665	0.589859	-0.306029	-0.0837921	0.109676	8.01427	86.722	4	956.461	0.081723
Mtap1b	Microtubule-associated protein 1B;MAP1 light chain LC1	S	1260	1.07827	P	S	L	S	P	S	P	P	S	P	I	E	K	T	P	L	G	RLSPAKSPSLSPSPPSPIEKTPLGERSVNFS	B2RQQ5;P14873	1260;1260	Casein kinase II substrate motif;DNA dependent Protein kinase substrate motif;ERK1,2 kinase substrate motif;GSK-3, ERK1, ERK2, CDK5 substrate motif;WW domain binding motif	LS(0.015)PAKS(0.959)PS(0.029)LS(0.996)PS(0.002)PPS(1)PIEK	111.33	0.999988	-0.257839	-0.106886	-0.0422242	0.841844	0.108724	8.11879	207.39	3	720.321	-0.20206
Psat1	Phosphoserine aminotransferase;Phosphoserine aminotransferase;Phosphoserine aminotransferase;Phosphoserine aminotransferase;Phosphoserine aminotransferase	S	344	1.07802	R	S	V	G	G	I	R	A	S	L	Y	N	A	V	T	T	E	MISLKGHRSVGGIRASLYNAVTTEDVEKLAA	Q543K5;Q8BTJ1;Q99K85;Q3U6K9;Q3ULZ3;Q99JU9	344;344;344;341;344;104	G protein-coupled receptor kinase 1 substrate motif;PKA kinase substrate motif;PKC kinase substrate motif	SVGGIRAS(1)LYNAVTTEDVEK	124.28	0.999644	-0.0682262	-0.0563411	0.252088	0.30602	0.108385	7.95882	152.13	2	1095.03	0.48526
Raly	RNA-binding protein Raly	T	268	1.07799	R	L	P	A	P	Q	E	D	T	A	S	E	A	G	T	P	Q	GSCSSSSRLPAPQEDTASEAGTPQGEVQTRD	Q64012;Q3U3F6;A2AU62	268;252;268	b-Adrenergic Receptor kinase substrate motif;Casein kinase II substrate motif;G protein-coupled receptor kinase 1 substrate motif	LPAPQEDT(1)AS(0.999)EAGT(0.001)PQGEVQTR	61.942	0.999568	0.0881415	0.0408223	0.0590591	0.245352	0.108344	8.29625	137.7	2	1221.51	1.2583
Braf	Serine/threonine-protein kinase B-raf	S	431	1.07798	K	T	L	G	R	R	D	S	S	D	D	W	E	I	P	D	G	SEDRSRMKTLGRRDSSDDWEIPDGQITVGQR	F6SZ47;P28028	431;484	14-3-3 domain binding motif;Calmodulin-dependent protein kinase II substrate motif;MDC1 BRCT domain binding motif;PKA kinase substrate motif;PKC kinase substrate motif;Plk1 PBD domain binding motif;ZIP kinase substrate motif	RDS(0.029)S(0.971)DDWEIPDGQITVGQR	99.044	0.971244	0.173127	0.0271541	0.0416548	0.191376	0.108328	7.8589	119.68	3	751.997	-0.14376
Ccdc94	Coiled-coil domain-containing protein 94	S	211	1.07778	R	H	R	R	L	L	E	D	S	E	S	E	D	E	A	P	P	AALLEEARHRRLLEDSESEDEAPPSRPRAAA	Q9D6J3	211	b-Adrenergic Receptor kinase substrate motif;Casein kinase II substrate motif;G protein-coupled receptor kinase 1 substrate motif	LLEDS(1)ES(1)EDEAPPSRPR	174	1	0.119688	0.0392789	0.159283	0.113988	0.10806	7.96633	219.3	2	1043.92	0.14593
Ccdc94	Coiled-coil domain-containing protein 94	S	213	1.07778	R	R	L	L	E	D	S	E	S	E	D	E	A	P	P	S	R	LLEEARHRRLLEDSESEDEAPPSRPRAAARP	Q9D6J3	213	b-Adrenergic Receptor kinase substrate motif;BARD1 BRCT domain binding motif;Casein kinase I substrate motif;Casein kinase II substrate motif;G protein-coupled receptor kinase 1 substrate motif	LLEDS(1)ES(1)EDEAPPSRPR	174	1	0.119688	0.0392789	0.159283	0.113988	0.10806	7.96633	219.3	2	1043.92	0.14593
Scaf1	Splicing factor, arginine/serine-rich 19	S	447	1.07753	D	F	L	S	L	H	A	D	S	D	G	E	G	A	L	Q	V	PRAPEGDDFLSLHADSDGEGALQVDLGEPPA	Q5U4C3	447	b-Adrenergic Receptor kinase substrate motif;Casein kinase II substrate motif	APEGDDFLS(0.107)LHADS(0.893)DGEGALQVDLGEPPAPPAADAR	45.993	0.892866	0.208892	0.160662	0.0950035	-0.033652	0.107726	8.24625	107.95	3	1227.55	-0.046779
Hnrnpul2	Heterogeneous nuclear ribonucleoprotein U-like protein 2	S	224	1.07742	R	E	E	A	Y	H	S	R	S	K	S	P	P	P	P	E	E	GRAYYEFREEAYHSRSKSPPPPEEEAKDEEE	F8VPM4;Q00PI9	224;224	Casein kinase II substrate motif;G protein-coupled receptor kinase 1 substrate motif	S(0.843)KS(0.156)PPPPEEEAKDEEEDQT(0.001)LVNLDTYTSDLHFQISK	59.228	0.843372	0.0992279	0.151209	NaN	0.0723008	0.107579	8.64647	155.15	5	840.187	0.18349
Srrm1	Serine/arginine repetitive matrix protein 1	S	799	1.07741	S	Q	S	P	S	T	N	W	S	P	A	V	P	A	K	K	A	APPSPVQSQSPSTNWSPAVPAKKAKSPTPSL	E9PUK6;A2A8V9;Q52KI8;E9QKA4;A2A8V8;F6UK16;A2A8W1	799;794;822;799;785;229;228	ERK1,2 kinase substrate motif;G protein-coupled receptor kinase 1 substrate motif;GSK-3, ERK1, ERK2, CDK5 substrate motif;MAPKAPK2 kinase substrate motif;WW domain binding motif	KPPAPPS(0.979)PVQS(0.024)QS(0.63)PS(0.189)T(0.189)NWS(0.989)PAVPAK	72.167	0.989183	-0.0214822	-0.00249806	0.339911	0.114332	0.107566	8.2992	75.127	3	932.413	-0.95696
Wdr61		S	6	1.07734	_	_	_	M	T	N	Q	Y	S	L	Q	A	R	A	S	P	_	__________MTNQYSLQARASP________	D6RDC7	6		MT(0.231)NQY(0.103)S(0.663)LQARAS(0.002)P	45.438	0.663419	-0.176185	0.236095	NaN	0.262504	0.107471	7.12038	98.902	2	794.845	-0.23458
Tnks1bp1	182 kDa tankyrase-1-binding protein	T	533	1.0772	G	V	S	Q	V	G	P	G	T	P	P	A	P	E	S	P	R	AVSGRGEGVSQVGPGTPPAPESPRKPISGVQ	B9EKJ7;P58871	533;533	ERK1,2 kinase substrate motif;G protein-coupled receptor kinase 1 substrate motif;GSK3, Erk1, Erk2 and CDK5 kinase motif;GSK-3, ERK1, ERK2, CDK5 substrate motif;WW domain binding motif	GEGVSQVGPGT(1)PPAPESPR	125.78	0.999844	0.464982	0.4755	-0.202763	-0.308594	0.107281	8.58966	134.62	2	949.936	0.43598
Slc4a1ap		S	412	1.0771	W	E	D	E	D	F	Y	D	S	D	D	D	T	F	L	D	R	RKRKAKNWEDEDFYDSDDDTFLDRTGLVEKK	E9PX68;E9Q585;Q6GQW1;Q3UUI2;E9Q1Q0;O54716;Q5BKS1	412;412;415;406;412;204;204	b-Adrenergic Receptor kinase substrate motif;Casein kinase I substrate motif;Casein kinase II substrate motif;G protein-coupled receptor kinase 1 substrate motif;Pyruvate dehydrogenase kinase substrate motif	NWEDEDFYDS(1)DDDTFLDR	223.15	0.999999	0.0639171	0.117828	-0.0402613	0.287114	0.107149	8.14501	264.52	2	1188.93	0.14976
Parva	Alpha-parvin	S	19	1.07697	V	P	K	S	P	T	P	K	S	P	P	S	R	K	K	D	D	SPQKSPLVPKSPTPKSPPSRKKDDSFLGKLG	Q8C5R4;Q9EPC1;D6RHM9	19;19;19	Casein kinase I substrate motif;Casein kinase II substrate motif;ERK1, ERK2, SAPK, CDK5 and GSK3 kinase substrate motif;ERK1,2 kinase substrate motif;Growth associated histone HI kinase substrate motif;GSK-3, ERK1, ERK2, CDK5 substrate motif;WW domain binding motif	SPTPKS(0.999)PPS(0.001)R	103.76	0.999484	0.165815	0.0430645	0.174882	0.0441516	0.106978	8.25266	118.9	2	567.271	0.39768
Ap3d1	AP-3 complex subunit delta-1	S	760	1.07677	R	H	S	S	L	P	T	E	S	D	E	D	I	A	P	A	Q	KKEKGKRRHSSLPTESDEDIAPAQRVDIITE	O54774;Q3U237	760;760	b-Adrenergic Receptor kinase substrate motif;Casein kinase II substrate motif;Pyruvate dehydrogenase kinase substrate motif	HS(0.007)S(0.993)LPTES(1)DEDIAPAQR	174.01	0.999765	0.190678	0.132643	0.0897893	0.0137128	0.106706	8.88227	238.8	2	1006.9	-0.086064
Cttn	Src substrate cortactin	S	407	1.07672	K	Q	T	P	P	A	S	P	S	P	Q	P	I	E	D	R	P	EEQARAKKQTPPASPSPQPIEDRPPSSPIYE	Q60598;Q8BNA5;Q921L6	407;370;370	DNA dependent Protein kinase substrate motif;ERK1,2 kinase substrate motif;GSK-3, ERK1, ERK2, CDK5 substrate motif;WW domain binding motif	KQT(1)PPAS(0.005)PS(0.995)PQPIEDRPPSSPIYEDAAPFK	110.43	0.9952	0.394514	-0.158607	0.150705	0.039948	0.10664	9.08682	167.1	3	1136.52	-0.17425
1700021F05Rik	Uncharacterized protein C6orf203 homolog	S	106	1.07585	Q	K	E	A	D	E	E	D	S	D	E	E	T	S	Y	P	E	KSTKKTLQKEADEEDSDEETSYPERSEQEEE	Q9CQF4;D3Z316	106;106	b-Adrenergic Receptor kinase substrate motif;BARD1 BRCT domain binding motif;Casein kinase I substrate motif;Casein kinase II substrate motif;G protein-coupled receptor kinase 1 substrate motif	EADEEDS(1)DEETSYPER	180.62	0.999931	0.317188	-0.14116	0.442105	-0.196229	0.105476	8.44826	180.62	2	990.847	-0.20383
Arfgap3	ADP-ribosylation factor GTPase-activating protein 3	S	331	1.07569	D	M	Q	T	I	E	Q	E	S	P	T	L	A	K	P	R	R	ISHSVTSDMQTIEQESPTLAKPRRKYQEDPE	Q9D8S3	331	b-Adrenergic Receptor kinase substrate motif;Casein kinase I substrate motif;Casein kinase II substrate motif;ERK1,2 kinase substrate motif;G protein-coupled receptor kinase 1 substrate motif;GSK-3, ERK1, ERK2, CDK5 substrate motif;WW domain binding motif	SGISHSVTSDMQTIEQES(1)PTLAKPR	144.44	0.999882	0.460481	-0.0207795	-0.0363276	0.0176507	0.105256	8.08909	183.58	3	927.104	0.021119
Oxr1		S	59	1.07554	G	P	E	E	L	R	P	P	S	P	A	S	P	E	G	P	D	APGDPGCGPEELRPPSPASPEGPDTGQKKTL	E9Q0A7	59	14-3-3 domain binding motif;Calmodulin-dependent protein kinase II substrate motif;Casein kinase I substrate motif;Casein kinase II substrate motif;DNA dependent Protein kinase substrate motif;ERK1,2 kinase substrate motif;G protein-coupled receptor kinase 1 substrate motif;GSK-3, ERK1, ERK2, CDK5 substrate motif;PKA kinase substrate motif;PKC kinase substrate motif;WW domain binding motif	FEDYLREPAPGDPGCGPEELRPPS(0.998)PAS(0.002)PEGPDTGQK	74.973	0.997547	0.119821	0.0632269	-0.00733908	0.244514	0.105056	8.41883	93.807	3	1310.58	0.47596
Tspyl1	Testis-specific Y-encoded-like protein 1	S	3	1.07553	_	_	_	_	_	_	M	S	S	P	E	R	D	E	G	T	P	_____________MSSPERDEGTPVPDSRGH	O88852	3	Casein kinase II substrate motif;Cdc2 kinase substrate motif;CDK kinase substrate motif;CDK1,2,4,6 kinase substrate motif;ERK1,2 kinase substrate motif;Growth associated histone HI kinase substrate motif;GSK-3, ERK1, ERK2, CDK5 substrate motif;MDC1 BRCT domain binding motif;Plk1 PBD domain binding motif;WW domain binding motif	S(0.029)S(0.964)PERDEGT(0.007)PVPDSR	101.2	0.964455	-0.196013	-0.0954196	0.319028	0.392573	0.105042	7.43837	128.95	2	875.868	-0.13773
Ankhd1		S	1554	1.07538	N	K	K	N	K	T	K	E	S	P	P	T	A	H	L	I	L	TPSTNRKNKKNKTKESPPTAHLILPEPHISL	E9PUR0;E9Q1M6;Q5BJ28;F7DE17	1554;1554;74;44	b-Adrenergic Receptor kinase substrate motif;Casein kinase I substrate motif;Casein kinase II substrate motif;ERK1,2 kinase substrate motif;G protein-coupled receptor kinase 1 substrate motif;GSK-3, ERK1, ERK2, CDK5 substrate motif;PKA kinase substrate motif;PKC kinase substrate motif;WW domain binding motif	T(0.035)KES(0.931)PPT(0.035)AHLILPEPHISLAQQK	97.69	0.930752	0.191689	0.104471	0.0183956	NaN	0.104852	7.75228	97.69	3	872.458	0.50518
Nfix	Nuclear factor 1;Nuclear factor 1;Nuclear factor 1;Nuclear factor 1;Nuclear factor 1 X-type	S	366	1.07529	V	L	A	G	V	R	P	G	S	P	R	A	T	A	S	A	L	FTHHPLPVLAGVRPGSPRATASALHFPSTSI	F6VBN9;Q5CZY4;E9PUH7;D3YZ00;P70257	366;366;353;361;361	14-3-3 domain binding motif;Calmodulin-dependent protein kinase II substrate motif;Casein kinase I substrate motif;ERK1,2 kinase substrate motif;G protein-coupled receptor kinase 1 substrate motif;Growth associated histone HI kinase substrate motif;GSK-3, ERK1, ERK2, CDK5 substrate motif;PKA kinase substrate motif;PKC kinase substrate motif;WW domain binding motif	MAFTHHPLPVLAGVRPGS(1)PR	75.574	0.999999	NaN	0.0655723	0.0700575	0.178567	0.104732	8.13593	75.574	4	559.786	0.17963
Map4k5	Mitogen-activated protein kinase kinase kinase kinase 5	S	335	1.07506	N	S	R	A	E	R	T	A	S	E	I	N	F	D	K	L	Q	TIRSTNRNSRAERTASEINFDKLQFEPPLRK	E9PX30;Q8BPM2;E9Q1T3;Q05BG3	335;335;268;268	14-3-3 domain binding motif;Calmodulin-dependent protein kinase II substrate motif;G protein-coupled receptor kinase 1 substrate motif;PKA kinase substrate motif;PKC kinase substrate motif	TAS(1)EINFDK	91.62	0.999848	0.0935602	-0.552897	0.54187	0.335153	0.104422	7.58944	132.47	2	552.734	-0.17766
Mtap1s	Microtubule-associated protein 1S;MAP1S heavy chain;MAP1S light chain	S	684	1.07483	H	R	K	P	P	P	P	A	S	P	G	S	S	D	S	S	A	VSPCEFSHRKPPPPASPGSSDSSARSQERPP	B2RWW1;Q8C052	684;684	Casein kinase I substrate motif;Casein kinase II substrate motif;ERK1,2 kinase substrate motif;G protein-coupled receptor kinase 1 substrate motif;GSK3 kinase substrate motif;GSK-3, ERK1, ERK2, CDK5 substrate motif;WW domain binding motif	KPPPPAS(0.991)PGS(0.002)S(0.002)DS(0.003)S(0.003)AR	46.461	0.990806	-0.0773302	0.205643	0.0864001	0.201726	0.10411	7.29568	46.461	2	809.367	-0.23435
Cttn	Src substrate cortactin	T	401	1.0747	E	Q	A	R	A	K	K	Q	T	P	P	A	S	P	S	P	Q	EARRKLEEQARAKKQTPPASPSPQPIEDRPP	Q60598;Q8BNA5;Q921L6	401;364;364	G protein-coupled receptor kinase 1 substrate motif;GSK-3, ERK1, ERK2, CDK5 substrate motif;PKA kinase substrate motif;PKC kinase substrate motif;WW domain binding motif	KQT(1)PPAS(0.992)PS(0.008)PQPIEDRPPS(0.487)S(0.487)PIY(0.026)EDAAPFK	134.26	0.999999	0.0719	0.104471	0.16196	0.0773911	0.10393	9.31391	167.1	3	1163.18	0.11401
Fkbp15	FK506-binding protein 15;Peptidyl-prolyl cis-trans isomerase	S	1159	1.0746	Q	D	S	Q	H	C	S	L	S	G	D	E	E	D	E	L	F	GTSLRHNQDSQHCSLSGDEEDELFKGATLKV	Q6P9Q6;B2RQ18	1159;1149	Casein kinase II substrate motif	HNQDSQHCSLS(1)GDEEDELFK	109.41	0.999893	0.182819	0.297133	-0.038998	-0.0257375	0.103804	8.24383	161.2	3	818.988	-0.12635
Srrm1	Serine/arginine repetitive matrix protein 1	S	400	1.07459	P	P	R	R	R	H	R	P	S	S	P	A	T	P	P	P	K	RLSPSASPPRRRHRPSSPATPPPKTRHSPTP	E9PUK6;A2A8V9;Q52KI8;E9QKA4;A2A8V8	400;395;400;400;400	DNA dependent Protein kinase substrate motif;G protein-coupled receptor kinase 1 substrate motif;PKA kinase substrate motif;PKC kinase substrate motif	HRPS(0.998)S(0.994)PAT(0.008)PPPK	111.34	0.998273	0.164014	0.121148	0.0188634	0.111134	0.10379	8.41561	140.8	2	716.313	0.40206
Ffr	Protein fat-free homolog	S	18	1.07459	G	L	G	S	G	P	G	D	S	P	E	G	P	E	A	D	A	AAAAVGPGLGSGPGDSPEGPEADAPERRRKA	Q3UVL4;E0CX85	18;18	b-Adrenergic Receptor kinase substrate motif;Casein kinase II substrate motif;ERK1,2 kinase substrate motif;G protein-coupled receptor kinase 1 substrate motif;GSK-3, ERK1, ERK2, CDK5 substrate motif;WW domain binding motif	AAAAAVGPGLGS(0.001)GPGDS(0.999)PEGPEADAPER	125.73	0.999466	0.0216219	0.291486	0.0730442	0.0289843	0.103784	7.92581	141.08	3	875.72	0.61806
Mxra7	Matrix-remodeling-associated protein 7	S	96	1.07455	G	R	Q	D	E	D	S	D	S	E	M	G	P	P	T	E	E	AEEPAAEGRQDEDSDSEMGPPTEEPEEEDGA	Q9CZH7;Q9D1T2	96;96	b-Adrenergic Receptor kinase substrate motif;Casein kinase I substrate motif;G protein-coupled receptor kinase 1 substrate motif	VAEPEES(0.777)EAEEPAAEGRQDEDS(0.377)DS(0.841)EMGPPT(0.005)EEPEEEDGAAFSFK	61.016	0.841431	0.182438	0.86758	NaN	-0.738811	0.103736	7.78197	83.59	4	1229.23	0.252
Clk1	Dual specificity protein kinase CLK1;Dual specificity protein kinase CLK4	S	340	1.07414	D	E	H	H	S	T	L	V	S	T	R	H	Y	R	A	P	E	FGSATYDDEHHSTLVSTRHYRAPEVILALGW	P22518;O35493;Q4FJV9;B1ATD0;Q3UKA7	340;339;339;159;33	MAPKAPK2 kinase substrate motif;PKA kinase substrate motif;PKC kinase substrate motif	VVDFGS(0.004)AT(0.005)Y(0.001)DDEHHS(0.015)T(0.047)LVS(0.718)T(0.21)R	56.424	0.71765	NaN	-0.132989	0.0624448	0.380089	0.103182	7.30501	60.991	3	806.02	-0.60913
	Uncharacterized protein CXorf23 homolog	S	78	1.07393	Y	H	R	S	Y	V	N	R	S	P	S	P	N	V	K	P	V	IPPRVNSYHRSYVNRSPSPNVKPVEKFDTYK	A2AG58	78	Casein kinase II substrate motif;ERK1,2 kinase substrate motif;Growth associated histone HI kinase substrate motif;GSK-3, ERK1, ERK2, CDK5 substrate motif;WW domain binding motif	SYVNRS(1)PS(1)PNVKPVEK	77.39	0.99998	0.118094	-0.180185	0.237065	0.236639	0.102903	8.08547	82.482	3	654.303	-0.28931
	Uncharacterized protein CXorf23 homolog	S	80	1.07393	R	S	Y	V	N	R	S	P	S	P	N	V	K	P	V	E	K	PRVNSYHRSYVNRSPSPNVKPVEKFDTYKPH	A2AG58	80	14-3-3 domain binding motif;Calmodulin-dependent protein kinase II substrate motif;Calmodulin-dependent protein kinase IV substrate motif;Chk1 kinase substrate motif;DNA dependent Protein kinase substrate motif;ERK1,2 kinase substrate motif;GSK-3, ERK1, ERK2, CDK5 substrate motif;PKA kinase substrate motif;PKC kinase substrate motif;WW domain binding motif	SYVNRS(1)PS(1)PNVKPVEK	77.39	0.999994	0.118094	-0.180185	0.237065	0.236639	0.102903	8.08547	82.482	3	654.303	-0.28931
Champ1	Chromosome alignment-maintaining phosphoprotein 1	S	603	1.07385	K	K	L	L	D	E	A	L	S	P	S	S	K	K	L	K	K	EGLLATPKKLLDEALSPSSKKLKKDSQENSD	Q8K327	603	Casein kinase I substrate motif;Casein kinase II substrate motif;ERK1,2 kinase substrate motif;GSK-3, ERK1, ERK2, CDK5 substrate motif;WW domain binding motif	KLLDEALS(0.999)PS(0.001)SK	118.21	0.998785	-0.223593	-0.355295	0.158413	0.831666	0.102798	7.26055	118.21	2	684.345	0.0097956
Matr3	Matrin-3	S	610	1.07355	S	Y	S	P	D	G	K	E	S	P	S	D	K	K	S	K	T	KDKSRKRSYSPDGKESPSDKKSKTDAQKTES	Q6ZQ61;Q3TTX0;Q4FJT0;Q5BL18;Q8K310;Q3TZN1;Q3UFN8	610;604;604;604;604;408;151	b-Adrenergic Receptor kinase substrate motif;Casein kinase II substrate motif;ERK1,2 kinase substrate motif;GSK-3, ERK1, ERK2, CDK5 substrate motif;PKA kinase substrate motif;PKC kinase substrate motif;Pyruvate dehydrogenase kinase substrate motif;WW domain binding motif	S(0.001)YS(0.999)PDGKES(1)PSDK	197.67	0.999994	0.15549	0.135009	0.0901116	0.0289404	0.102388	8.3811	247.61	2	778.781	-0.1783
Larp7	La-related protein 7	T	251	1.07339	C	K	A	T	K	R	P	R	T	A	S	E	G	S	E	A	E	DSSSSGLCKATKRPRTASEGSEAETPEAPKQ	I3PQW3;Q05CL8	251;251	Calmodulin-dependent protein kinase II substrate motif;Casein kinase II substrate motif;PKA kinase substrate motif;PKC kinase substrate motif	T(0.946)AS(0.946)EGS(0.108)EAETPEAPKQPAK	218.69	0.946245	0.0743684	0.144699	0.012621	0.177001	0.102172	7.87772	229.1	2	1044.43	0.26085
Filip1l	Filamin A-interacting protein 1-like	S	789	1.07272	P	S	L	N	E	R	R	I	S	D	P	Q	V	F	S	K	E	HFSKSLRPSLNERRISDPQVFSKEVQTEAAD	E0CYH7;Q6P6L0;E0CYM1	789;789;551	14-3-3 domain binding motif;Calmodulin-dependent protein kinase II substrate motif;MAPKAPK2 kinase substrate motif;PAK2 kinase substrate motif;PKA kinase substrate motif;PKA, PKG kinase substrate motif;PKC epsilon kinase substrate motif;PKC kinase substrate motif;PKG kinase substrate motif	RIS(1)DPQVFSK	158.52	1	0.100036	-0.42554	0.601825	0.128771	0.101273	8.2145	164.88	2	628.805	-0.098661
Srsf2	Serine/arginine-rich splicing factor 2	S	72	1.0726	V	D	N	L	T	Y	R	T	S	P	D	T	L	R	R	V	F	EGMTSLKVDNLTYRTSPDTLRRVFEKYGRVG	Q06477;F7CZ20;E9Q975;Q8C671;A2AA29;Q62093	72;71;26;26;26;26	AMP-activated protein kinase substrate motif;Casein kinase I substrate motif;Casein kinase II substrate motif;ERK1,2 kinase substrate motif;GSK-3, ERK1, ERK2, CDK5 substrate motif;PKA kinase substrate motif;PKC kinase substrate motif;WW domain binding motif	VDNLT(0.004)YRT(0.009)S(0.987)PDTLR	137.81	0.987316	0.267955	0.0600474	0.141892	-0.0654344	0.101115	8.85899	152.94	2	865.909	0.020041
Brd3	Bromodomain-containing protein 3	S	262	1.07195	A	I	T	A	S	R	S	E	S	P	P	P	L	S	E	P	K	TTTPTTSAITASRSESPPPLSEPKQAKVVAR	Q5CCJ9;Q3TUI3;Q4G5Y4;Q8K2F0;A2AKA9;Q05DR7;Q53TY6	262;262;262;262;262;262;262	14-3-3 domain binding motif;b-Adrenergic Receptor kinase substrate motif;Calmodulin-dependent protein kinase II substrate motif;ERK1,2 kinase substrate motif;GSK-3, ERK1, ERK2, CDK5 substrate motif;MAPKAPK2 kinase substrate motif;PKA kinase substrate motif;PKC kinase substrate motif;WW domain binding motif	SES(1)PPPLSEPK	171.29	0.999995	0.129217	0.0540844	0.189401	0.0282339	0.100234	8.08493	177.42	2	624.281	-0.19068
Patl1	Protein PAT1 homolog 1	S	179	1.07178	R	A	L	P	R	R	S	T	S	P	I	I	G	S	P	P	V	DDRDLSERALPRRSTSPIIGSPPVRAVPIGT	Q3TC46	179	14-3-3 domain binding motif;Calmodulin-dependent protein kinase II substrate motif;ERK1,2 kinase substrate motif;GSK-3, ERK1, ERK2, CDK5 substrate motif;PKA kinase substrate motif;PKC kinase substrate motif;WW domain binding motif;ZIP kinase substrate motif	RST(0.003)S(0.997)PIIGS(1)PPVR	121.26	0.996662	-0.270086	0.485015	-0.033934	0.219052	0.100012	7.85968	134.52	2	763.86	0.33098
Rbbp6	E3 ubiquitin-protein ligase RBBP6	S	1329	1.07152	K	W	D	K	D	D	F	E	S	E	E	E	D	V	K	T	T	MIQVPQSKWDKDDFESEEEDVKTTQPIQSVG	P97868;A0PJG9	1329;185	b-Adrenergic Receptor kinase substrate motif;BARD1 BRCT domain binding motif;Casein kinase I substrate motif;Casein kinase II substrate motif;G protein-coupled receptor kinase 1 substrate motif	WDKDDFES(1)EEEDVK	166.61	1	0.206393	0.212632	-0.0618453	0.0414319	0.0996528	8.30496	219.06	2	925.854	0.86432
Cobll1	Cordon-bleu protein-like 1	S	313	1.0715	P	L	V	S	K	H	R	P	S	F	T	R	S	N	T	I	S	TASAPATPLVSKHRPSFTRSNTISKPYISNT	E9QPU9;Q3UMF0;B1AZ14;B1AZ15;D3Z6S2;B1AZ10;B1AZ11;B1AZ26	313;313;281;281;263;281;280;314	Casein kinase II substrate motif;DNA dependent Protein kinase substrate motif;G protein-coupled receptor kinase 1 substrate motif;GSK3 kinase substrate motif;PKA kinase substrate motif;PKC kinase substrate motif	HRPS(1)FTR	84.615	0.999872	0.0196308	-0.31337	0.32867	0.363586	0.0996295	8.25624	92.051	3	327.487	-0.062836
Rsl1d1		S	339	1.07096	L	A	S	S	A	P	A	K	S	P	G	A	Q	K	K	K	T	SLLTQSGLASSAPAKSPGAQKKKTNKAHKKQ	Q3UL54;Q8K235;Q3TH37;Q3TS64;Q8BVY0;Q9CSF9;E9Q0A1;Q3TAJ5;Q3TGI9;Q3TN25	339;326;326;326;326;326;260;260;260;260	ERK1,2 kinase substrate motif;Growth associated histone HI kinase substrate motif;GSK-3, ERK1, ERK2, CDK5 substrate motif;WW domain binding motif	ATSLLT(0.004)QS(0.003)GLAS(0.006)S(0.004)APAKS(0.983)PGAQK	73.057	0.982758	0.216858	-0.11796	0.129655	0.167053	0.0989018	7.44511	73.057	3	751.049	0.032122
Srrm2	Serine/arginine repetitive matrix protein 2	S	1068	1.07056	K	G	S	L	S	R	S	S	S	P	V	T	E	L	T	A	R	SKSQTSPKGSLSRSSSPVTELTARSPVKQDK	Q8BTI8	1068	14-3-3 domain binding motif;Calmodulin-dependent protein kinase II substrate motif;Calmodulin-dependent protein kinase IV substrate motif;Casein kinase I substrate motif;Casein kinase II substrate motif;Chk1 kinase substrate motif;ERK1,2 kinase substrate motif;GSK-3, ERK1, ERK2, CDK5 substrate motif;MAPKAPK2 kinase substrate motif;MDC1 BRCT domain binding motif;PKA kinase substrate motif;PKC kina…	S(0.001)S(0.001)S(0.999)PVTELTAR	177.42	0.998775	-0.0715425	0.388024	-0.0754641	0.152436	0.0983633	9.14067	192.14	2	614.284	-0.52401
Bclaf1	Bcl-2-associated transcription factor 1	S	395	1.07043	S	A	K	Q	K	F	H	D	S	E	G	D	D	T	E	E	T	DYFSDKESAKQKFHDSEGDDTEETEDYRQFR	Q8K019;F8WI22;Q3UDL9;Q3UR37;H7BX81;Q3TSZ0;Q3TRC6;E9Q5V0;Q05C67	395;395;395;393;395;395;395;395;395	b-Adrenergic Receptor kinase substrate motif;Casein kinase II substrate motif;G protein-coupled receptor kinase 1 substrate motif;PKA kinase substrate motif;Pyruvate dehydrogenase kinase substrate motif	FHDS(1)EGDDTEETEDYRQFR	173.56	1	0.125387	0.12075	0.10538	0.041239	0.0981889	9.25074	342.19	2	1228.47	0.68525
Helb	DNA helicase B	T	992	1.07034	A	S	V	N	D	D	V	D	T	D	E	E	S	A	Q	L	R	GDERWLSASVNDDVDTDEESAQLRGSKRIGD	G5E835;Q6NVF4	992;992	b-Adrenergic Receptor kinase substrate motif;Casein kinase I substrate motif;Casein kinase II substrate motif;G protein-coupled receptor kinase 1 substrate motif	WLSASVNDDVDT(1)DEESAQLR	210.98	0.999999	-0.258719	-0.0336877	0.155534	0.529156	0.0980709	7.77577	210.98	3	777.332	0.90471
Klf3	Krueppel-like factor 3	S	249	1.07025	G	K	R	P	L	P	V	E	S	P	D	T	Q	R	K	R	R	PSVIVQPGKRPLPVESPDTQRKRRIHRCDYD	Q545J5;Q60980;F8WIC9;Q8BV07	249;249;221;179	b-Adrenergic Receptor kinase substrate motif;Casein kinase I substrate motif;Casein kinase II substrate motif;ERK1,2 kinase substrate motif;GSK-3, ERK1, ERK2, CDK5 substrate motif;WW domain binding motif	RPLPVES(1)PDTQR	154.88	0.999999	0.0945064	-0.038347	0.161492	0.174133	0.0979461	8.21458	155.56	2	737.856	-0.16406
Dync1li2	Cytoplasmic dynein 1 light intermediate chain 2	S	194	1.07023	E	P	E	E	G	C	Q	G	S	P	Q	R	R	G	P	L	T	KEFQDYIEPEEGCQGSPQRRGPLTSGSDEDS	Q6PDL0	194	Cdc2 kinase substrate motif;CDK kinase substrate motif;CDK1,2,4,6 kinase substrate motif;ERK1,2 kinase substrate motif;GSK-3, ERK1, ERK2, CDK5 substrate motif;WW domain binding motif	EFQDYIEPEEGCQGS(1)PQRR	105.96	1	0.189793	0.1129	0.000447258	0.0885461	0.0979216	8.8291	245.97	2	1203	-0.078556
Wbp7	Histone-lysine N-methyltransferase MLL4	S	866	1.06972	R	D	R	A	S	G	P	E	S	P	L	Q	G	P	R	I	K	DESMEAKRDRASGPESPLQGPRIKHVCRHAA	F8WJ40;O08550;E9Q6J1;F6W623;Q6PHU4	866;866;310;158;157	b-Adrenergic Receptor kinase substrate motif;ERK1,2 kinase substrate motif;GSK-3, ERK1, ERK2, CDK5 substrate motif;MAPKAPK2 kinase substrate motif;WW domain binding motif	ASGPES(1)PLQGPR	103.14	0.999999	0.0890913	NaN	0.198361	0.00424773	0.0972334	7.15433	103.83	2	638.29	-0.053299
Chaf1b	Chromatin assembly factor 1 subunit B	T	439	1.06953	T	Q	D	P	S	S	P	C	T	T	P	S	P	T	T	Q	S	EGTPSNRTQDPSSPCTTPSPTTQSPAPSAIK	Q9D0N7	439	Casein kinase I substrate motif;Casein kinase II substrate motif;G protein-coupled receptor kinase 1 substrate motif;MAPKAPK2 kinase substrate motif	TQDPSS(0.001)PCT(0.999)T(0.001)PSPTTQSPAPSAIK	166.21	0.998692	0.207893	-0.0767215	0.195566	0.0611798	0.0969794	7.57888	166.21	3	846.047	-0.10255
Phf10	PHD finger protein 10	S	326	1.06951	S	D	S	S	S	G	N	V	S	E	G	D	S	P	P	D	S	KRKNKGTSDSSSGNVSEGDSPPDSQEDTFHG	Q9D8M7;E9QLX5	326;239	Casein kinase II substrate motif;G protein-coupled receptor kinase 1 substrate motif;GSK3 kinase substrate motif;MAPKAPK2 kinase substrate motif;Pyruvate dehydrogenase kinase substrate motif	GTSDSSS(0.001)GNVS(0.999)EGDSPPDSQEDTFHGR	173.43	0.99919	0.0329472	0.098689	NaN	0.159202	0.0969462	8.05633	173.43	3	944.7	-0.26315
Pcbp2	Poly(rC)-binding protein 2	Y	178	1.06939	P	P	K	G	V	T	I	P	Y	R	P	K	P	S	S	S	P	CVVMLESPPKGVTIPYRPKPSSSPVIFAGGQ	Q61990;B2M1R7;Q3TF69	178;178;178		GVT(0.011)IPY(0.799)RPKPS(0.187)S(0.002)S(0.001)PVIFAGGQDR	88.574	0.798527	0.156397	0.0734089	0.0737577	0.083615	0.0967946	8.56739	99.059	4	628.07	0.12025
Svil	Supervillin	S	220	1.06933	A	F	F	S	E	R	S	I	S	F	P	E	V	P	R	S	P	LGEDGSSAFFSERSISFPEVPRSPKQIPSSP	E3VVQ8;E9Q983;E9Q3Z5;Q8K4L3;Q8K4L2;E9PVA9;Q8C9L0;A1A5A1	220;220;220;220;220;220;220;133	14-3-3 domain binding motif;Calmodulin-dependent protein kinase II substrate motif;Casein kinase II substrate motif;PKA kinase substrate motif;PKC kinase substrate motif	S(0.016)IS(0.983)FPEVPRS(0.001)PK	61.435	0.983463	0.196607	-0.119197	0.243933	0.0654911	0.0967086	7.5171	83.499	2	712.353	-0.91177
Srrm2	Serine/arginine repetitive matrix protein 2	S	982	1.0691	P	P	D	Q	N	L	S	G	S	K	S	P	C	P	Q	K	S	LKSMLQTPPDQNLSGSKSPCPQKSRDSPTGS	Q8BTI8	982	Casein kinase II substrate motif	S(0.006)MLQT(0.994)PPDQNLS(0.071)GS(0.805)KS(0.124)PCPQK	84.674	0.804823	NaN	0.0604624	0.0991699	0.12956	0.0963976	7.63621	93.446	3	820.683	-0.54844
Usp11	Ubiquitin carboxyl-terminal hydrolase 11	Y	882	1.06881	N	Q	I	E	S	K	A	A	Y	V	L	F	Y	Q	R	Q	D	SVSPVNENQIESKAAYVLFYQRQDVGRRQSQ	Q99K46;Q8C0C2;Q3TFK2;Q3T9X4	882;660;509;257	3BP2 SH2 domain binding motif	DS(0.137)GQWHY(0.314)FDDNS(0.547)VS(0.033)PVNENQIES(0.225)KAAY(0.812)VLFY(0.931)QR	45.192	0.812425	0.177216	0.0982848	0.236538	-0.128029	0.0960023	8.50717	45.192	4	1037.43	0.83782
Zcrb1	Zinc finger CCHC-type and RNA-binding motif-containing protein 1	S	155	1.06877	E	E	I	E	E	V	E	V	S	E	E	E	G	E	D	P	A	RKLPEPEEEIEEVEVSEEEGEDPALDSLSQA	Q9CZ96	155	BARD1 BRCT domain binding motif;Casein kinase II substrate motif;G protein-coupled receptor kinase 1 substrate motif	KLPEPEEEIEEVEVS(1)EEEGEDPALDSLSQAIAFQQAK	96.505	0.999908	-0.0925248	0.0221902	0.165111	0.289016	0.0959481	8.44253	114.79	4	1048.99	0.20313
Bclaf1	Bcl-2-associated transcription factor 1	S	387	1.06857	L	D	Y	F	S	D	K	E	S	A	K	Q	K	F	H	D	S	DWDDQEVLDYFSDKESAKQKFHDSEGDDTEE	Q8K019;F8WI22;Q3UDL9;Q3UR37;H7BX81;Q3TSZ0;Q3TRC6;E9Q5V0;Q05C67	387;387;387;385;387;387;387;387;387	b-Adrenergic Receptor kinase substrate motif;Casein kinase I substrate motif;MAPKAPK2 kinase substrate motif;PKA kinase substrate motif;PKC kinase substrate motif	ADGDWDDQEVLDYFS(0.002)DKES(0.998)AK	156.13	0.997854	NaN	0.00532815	0.19856	0.0831565	0.0956815	8.08059	174.59	3	838.339	0.24383
Ddx47	Probable ATP-dependent RNA helicase DDX47	S	9	1.06843	M	A	A	D	E	E	P	D	S	P	S	G	A	L	Q	T	A	_______MAADEEPDSPSGALQTAAEEEETK	Q4VBG1;Q9CWX9;D3YWF9	9;9;9	b-Adrenergic Receptor kinase substrate motif;Casein kinase I substrate motif;Casein kinase II substrate motif;ERK1,2 kinase substrate motif;G protein-coupled receptor kinase 1 substrate motif;GSK-3, ERK1, ERK2, CDK5 substrate motif;WW domain binding motif	AADEEPDS(0.99)PS(0.009)GALQT(0.001)AAEEEETK	110.38	0.990499	0.0461418	0.223546	-0.0298416	0.142099	0.0954863	8.07357	194.25	3	833.009	-0.41437
Nup35	Nucleoporin NUP53	S	73	1.06837	R	S	P	L	L	A	G	G	S	P	P	Q	P	V	V	P	A	SVGVMEMRSPLLAGGSPPQPVVPAHKDKSGA	Q8R4R6;A2ATJ2	73;73	ERK1,2 kinase substrate motif;G protein-coupled receptor kinase 1 substrate motif;GSK-3, ERK1, ERK2, CDK5 substrate motif;WW domain binding motif	SPLLAGGS(1)PPQPVVPAHKDK	68.42	0.999979	0.222928	0.126576	0.104449	-0.0723115	0.0954105	7.3286	68.42	3	692.361	-0.75792
[truncated: 2,139 more rows]

## Sheet: B. GO analysis, 3T3
Category name	Category type	Mean dephosphorylation score	Category size	Mean (log2)	p-value	Score	Benj. Hoch. FDR
[truncated: 88 more rows]

[truncated: 3 more sheets: C. MS2 TMT raw data, D. MS3 TMT raw data, E. Dephosphorylation, neurons]
